# Supplementary material for: Regioisomeric branched trisaccharides: a combined synthetic, biological, and computational approach to understand details of FimH-mediated bacterial adhesion
Source: Royal Society of Chemistry journal article supplement (doi:10.1039/d5ob00927h), 2025-01-01
Supplement: d5ob00927h1.pdf [file d5ob00927h1.pdf]

## Electronic Supplementary Information (ESI)

for

# Regioisomeric Branched Trisaccharides: A Combined Synthetic, Biological, and Computational Approach to Understand Details of FimH-Mediated Bacterial Adhesion

Ingo vom Sondern,<sup>[1]</sup> Thisbe K. Lindhorst<sup>[1]\*</sup>

[1] Otto Diels Institute of Organic Chemistry, Christiana Albertina University of Kiel, Otto-Hahn-Platz 3-4, 24118 Kiel, Germany

### Table of Contents

|                                                                                                                                                                           |          |
|---------------------------------------------------------------------------------------------------------------------------------------------------------------------------|----------|
| <b>1. General Synthetic Methods .....</b>                                                                                                                                 | <b>3</b> |
| <b>2. Synthesis of Oligosaccharides .....</b>                                                                                                                             | <b>4</b> |
| 2.1. 2,3-Di- O-acetyl-4,6- O-benzyliden-β-D-glucopyranosyl azide ( <b>2</b> ) <sup>[3]</sup> .....                                                                        | 4        |
| 2.2. 2,3-Di- O-acetyl-6- O-benzyl-β-D-glucopyranosyl azide ( <b>3</b> ) .....                                                                                             | 5        |
| 2.3. 2,3,4,6-Tetra- O-acetyl-β-D-glucopyranosyl-(1→4)-2,3-di- O-acetyl-6- O-benzyl-β-D-glucopyranosyl azide ( <b>4</b> ) ...                                              | 6        |
| 2.4. 2,3,4,6-Tetra- O-acetyl-α-D-mannopyranosyl-(1→4)-2,3-di- O-acetyl-6- O-benzyl-β-D-glucopyranosyl azide ( <b>5</b> ) .                                                | 7        |
| 2.5. 2,3,4,6-Tetra- O-acetyl-β-D-glucopyranosyl-(1→4)-2,3-di- O-acetyl-β-D-glucopyranosyl azide ( <b>6</b> ) .....                                                        | 8        |
| 2.6. 2,3,4,6-Tetra- O-acetyl-α-D-mannopyranosyl-(1→4)-2,3-di- O-acetyl-β-D-glucopyranosyl azide ( <b>7</b> ) .....                                                        | 9        |
| 2.7. 2,3,4,6-Tetra- O-acetyl-β-D-glucopyranosyl-(1→4)-[2,3,4,6-tetra- O-acetyl-α-D-mannopyranosyl-(1→6)]-2,3-di- O-acetyl-β-D-glucopyranosyl azide ( <b>8</b> ) .....     | 10       |
| 2.8. 2,3,4,6-Tetra- O-acetyl-α-D-mannopyranosyl-(1→4)-[2,3,4,6-tetra- O-acetyl-β-D-glucopyranosyl-(1→6)]-2,3-di- O-acetyl-β-D-glucopyranosyl azide ( <b>9</b> ) .....     | 11       |
| 2.9. β-D-Glucopyranosyl-(1→4)-[α-D-mannopyranosyl-(1→6)]-β-D-glucopyranosyl azide ( <b>10</b> ) .....                                                                     | 12       |
| 2.10. α-D-Mannopyranosyl-(1→4)-[β-D-glucopyranosyl-(1→6)]-β-D-glucopyranosyl azide ( <b>11</b> ) .....                                                                    | 13       |
| 2.11. 2,3-Di- O-acetyl-6- O-benzyl-β-D-galactopyranosyl azide ( <b>13</b> ) .....                                                                                         | 14       |
| 2.12. 2,3,4,6-Tetra- O-acetyl-β-D-glucopyranosyl-(1→4)-2,3-di- O-acetyl-6- O-benzyl-β-D-galactopyranosyl azide ( <b>14</b> ) .....                                        | 15       |
| 2.13. 2,3,4,6-Tetra- O-acetyl-α-D-mannopyranosyl-(1→4)-2,3-di- O-acetyl-6- O-benzyl-β-D-galactopyranosyl azide ( <b>15</b> ) .....                                        | 16       |
| 2.14. 2,3,4,6-Tetra- O-acetyl-β-D-glucopyranosyl-(1→4)-2,3-di- O-acetyl-β-D-galactopyranosyl azide ( <b>16</b> ) .....                                                    | 17       |
| 2.15. 2,3,4,6-Tetra- O-acetyl-α-D-mannopyranosyl-(1→4)-2,3-di- O-acetyl-β-D-galactopyranosyl azide ( <b>17</b> ) .....                                                    | 18       |
| 2.16. 2,3,4,6-Tetra- O-acetyl-β-D-glucopyranosyl-(1→4)-[2,3,4,6-tetra- O-acetyl-α-D-mannopyranosyl-(1→6)]-2,3-di- O-acetyl-β-D-galactopyranosyl azide ( <b>18</b> ) ..... | 19       |
| 2.17. 2,3,4,6-Tetra- O-acetyl-α-D-mannopyranosyl-(1→4)-[2,3,4,6-tetra- O-acetyl-β-D-glucopyranosyl-(1→6)]-2,3-di- O-acetyl-β-D-galactopyranosyl azide ( <b>19</b> ) ..... | 20       |
| 2.18. β-D-Glucopyranosyl-(1→4)-[α-D-mannopyranosyl-(1→6)]-β-D-galactopyranosyl azide ( <b>20</b> ) .....                                                                  | 21       |
| 2.19. α-D-Mannopyranosyl-(1→4)-[β-D-glucopyranosyl-(1→6)]-β-D-galactopyranosyl azide ( <b>21</b> ) .....                                                                  | 22       |
| 2.20. 2,3-Di- O-acetyl-β-D-glucopyranosyl azide ( <b>22</b> ) <sup>[6]</sup> .....                                                                                        | 23       |
| 2.21. 2,3-Di- O-acetyl-β-D-galactopyranosyl azide ( <b>23</b> ) .....                                                                                                     | 23       |

|           |                                                                                                                                                                                                                           |            |
|-----------|---------------------------------------------------------------------------------------------------------------------------------------------------------------------------------------------------------------------------|------------|
| 2.22.     | 2,3,4,6-Tetra- O-acetyl- $\alpha$ -D-mannopyranosyl-(1 $\rightarrow$ 4)-[2,3,4,6-tetra-O-acetyl- $\alpha$ -D-mannopyranosyl-(1 $\rightarrow$ 6)]-2,3-di-O-acetyl- $\beta$ -D-glucopyranosyl azide ( <b>24</b> ).....      | 24         |
| 2.23.     | 2,3,4,6-Tetra- O-acetyl- $\alpha$ -D-mannopyranosyl-(1 $\rightarrow$ 4)-[2,3,4,6-tetra-O-acetyl- $\alpha$ -D-mannopyranosyl-(1 $\rightarrow$ 6)]-2,3-di-O-acetyl- $\beta$ -D-galactopyranosyl azide ( <b>25</b> ).....    | 25         |
| 2.24.     | $\alpha$ -D-Mannopyranosyl-(1 $\rightarrow$ 4)-[ $\alpha$ -D-mannopyranosyl-(1 $\rightarrow$ 6)]- $\beta$ -D-glucopyranosyl azide ( <b>26</b> ) .....                                                                     | 26         |
| 2.25.     | $\alpha$ -D-Mannopyranosyl-(1 $\rightarrow$ 4)-[ $\alpha$ -D-mannopyranosyl-(1 $\rightarrow$ 6)]- $\beta$ -D-galactopyranosyl azide ( <b>27</b> ) .....                                                                   | 27         |
| 2.26.     | 2,3,4,6-Tetra- O-benzoyl- $\alpha$ -D-glucopyranosyl-(1 $\rightarrow$ 4)-1,6-di- O-acetyl-2,3-di- O-benzoyl- $\alpha,\beta$ -D-glucopyranose ( <b>28</b> ) .....                                                          | 27         |
| 2.27.     | 2,3,4,6-Tetra- O-benzoyl- $\alpha$ -D-glucopyranosyl-(1 $\rightarrow$ 4)-6- O-acetyl-2,3-di- O-benzoyl- $\beta$ -D-glucopyranosyl azide ( <b>29</b> ) .....                                                               | 29         |
| 2.28.     | 2,3,4,6-Tetra- O-benzoyl- $\alpha$ -D-glucopyranosyl-(1 $\rightarrow$ 4)-2,3-di- O-benzoyl- $\beta$ -D-glucopyranosyl azide ( <b>30</b> ) .....                                                                           | 30         |
| 2.29.     | 2,3,4,6-Tetra- O-benzoyl- $\alpha$ -D-glucopyranosyl-(1 $\rightarrow$ 4)-[2,3,4,6-tetra- O-acetyl- $\alpha$ -D-mannopyranosyl-(1 $\rightarrow$ 6)]-2,3-di- O-benzoyl- $\beta$ -D-glucopyranosyl azide ( <b>31</b> ) ..... | 31         |
| 2.30.     | $\alpha$ -D-glucopyranosyl-(1 $\rightarrow$ 4)-[ $\alpha$ -D-mannopyranosyl-(1 $\rightarrow$ 6)]- $\beta$ -D-glucopyranosyl azide ( <b>32</b> ).....                                                                      | 32         |
| 2.31.     | 2,3,4,6-Tetra- O-benzoyl- $\beta$ -D-glucopyranosyl-(1 $\rightarrow$ 3)-6- O-acetyl-2,4-di- O-benzoyl- $\beta$ -D-glucopyranosyl azide ( <b>34</b> ) .....                                                                | 33         |
| 2.32.     | 2,3,4,6-Tetra- O-benzoyl- $\beta$ -D-glucopyranosyl-(1 $\rightarrow$ 3)-2,4-di- O-benzoyl- $\beta$ -D-glucopyranosyl azide ( <b>35</b> ) .....                                                                            | 34         |
| 2.33.     | 2,3,4,6-Tetra- O-benzoyl- $\beta$ -D-glucopyranosyl-(1 $\rightarrow$ 3)-[2,3,4,6-tetra-O-acetyl- $\alpha$ -D-mannopyranosyl-(1 $\rightarrow$ 6)]-2,4-di- O-benzoyl- $\beta$ -D-glucopyranosyl azide ( <b>36</b> ) .....   | 35         |
| 2.34.     | $\beta$ -D-Glucopyranosyl-(1 $\rightarrow$ 3)-[ $\alpha$ -D-mannopyranosyl-(1 $\rightarrow$ 6)]- $\beta$ -D-glucopyranosyl azide ( <b>37</b> ) .....                                                                      | 36         |
| 2.35.     | 2,4-Di- O-benzoyl- $\beta$ -D-mannopyranosyl azide ( <b>39</b> ) and 3,4-di- O-benzoyl- $\beta$ -D-manno-pyranosyl azide ( <b>S4</b> ) and 4,6-di- O-benzoyl- $\beta$ -D-mannopyranosyl azide ( <b>S5</b> ) .....         | 37         |
| 2.36.     | 2,3,4,6-Tetra- O-acetyl- $\alpha$ -D-mannopyranosyl-(1 $\rightarrow$ 3)-[2,3,4,6-tetra- O-acetyl- $\alpha$ -D-mannopyranosyl-(1 $\rightarrow$ 6)]-2,4-di- O-benzoyl- $\beta$ -D-mannopyranosyl azide ( <b>40</b> ) .....  | 38         |
| 2.37.     | $\alpha$ -D-Mannopyranosyl-(1 $\rightarrow$ 3)-[ $\alpha$ -D-mannopyranosyl-(1 $\rightarrow$ 6)]- $\beta$ -D-mannopyranosyl azide ( <b>41</b> ) .....                                                                     | 40         |
| 2.38.     | 2,3,4-Tri- O-acetyl-6- O-benzyl- $\beta$ -D-galactopyranosyl azide ( <b>42</b> ).....                                                                                                                                     | 40         |
| 2.39.     | 2,3,4-Tri- O-acetyl- $\beta$ -D-galactopyranosyl azide ( <b>43</b> ) .....                                                                                                                                                | 41         |
| 2.40.     | 2,3,4,6-Tetra- O-acetyl- $\alpha$ -D-mannopyranosyl-(1 $\rightarrow$ 6)-2,3,4-tri- O-acetyl- $\beta$ -D-galactopyranosyl azide ( <b>44</b> ) .....                                                                        | 42         |
| 2.41.     | $\alpha$ -D-Mannopyranosyl-(1 $\rightarrow$ 6)- $\beta$ -D-galactopyranosyl azide ( <b>45</b> ) .....                                                                                                                     | 43         |
| 2.42.     | $\alpha$ -D-Mannopyranosyl-(1 $\rightarrow$ 4)- $\beta$ -D-glucopyranosyl azide ( <b>S6</b> ) .....                                                                                                                       | 43         |
| 2.43.     | $\alpha$ -D-Mannopyranosyl-(1 $\rightarrow$ 4)- $\beta$ -D-galactopyranosyl azide ( <b>S7</b> ) .....                                                                                                                     | 44         |
| 2.44.     | 2,3,4,6-Tetra- O-benzoyl- $\alpha$ -D-glucopyranosyl-(1 $\rightarrow$ 4)-2,3-di- O-benzoyl-1,6-anhydro- $\beta$ -D-glucopyranose ( <b>S9</b> ) .                                                                          | 45         |
| <b>3.</b> | <b>Biological Testing .....</b>                                                                                                                                                                                           | <b>47</b>  |
| <b>4.</b> | <b>Molecular Modelling .....</b>                                                                                                                                                                                          | <b>58</b>  |
| <b>5.</b> | <b>NMR Spectra of synthesized saccharides .....</b>                                                                                                                                                                       | <b>77</b>  |
| <b>6.</b> | <b>Literature.....</b>                                                                                                                                                                                                    | <b>123</b> |

## 1. General Synthetic Methods

Unless otherwise stated, reactions were carried out under atmospheric conditions. Moisture or oxygen sensitive reactions were performed in oven-dried glassware under a positive pressure of nitrogen. Analytical thin layer chromatography (TLC) was performed on silica gel plates (Alugram<sup>®</sup> Xtra Sil G/UV<sub>254</sub>). Visualization of developed TLC plates was achieved by UV light and/or 10% sulfuric acid in ethanol or vanillin stain (900 mg vanillin, 12 mL H<sub>2</sub>SO<sub>4</sub>, 90 mL H<sub>2</sub>O, 90 mL EtOH) or ninhydrin stain (200 mg ninhydrin, 1 mL acidic acid, 200 mL acetone), followed by heating at approx. 200 °C. Purification of products by flash chromatography was performed on silica gel (Merck, 230–400 mesh, particle size 0.040–0.063 mm) or prepacked silica columns (Interchim<sup>®</sup>, 30 µm spherical particle size, 4-80 g) in combination with a puriFlash 450 or puriFlash 5.020 automated flash chromatography system. Automated reverse phase flash chromatography was performed on prepacked columns (C18AQ, particle size 15 µm, Interchim<sup>®</sup>). The solvents MeOH and DMF were dried over molecular sieves (3Å) under a nitrogen atmosphere. CH<sub>2</sub>Cl<sub>2</sub> was dried over aluminum oxide columns utilizing a PureSolv MD5 solvent purification system from Inert Corporation<sup>®</sup>. Infrared (IR) spectra were recorded on a PerkinElmer FT-IR Paragon 1000 (ATR) spectrometer. Optical rotation values were measured on an Anton Paar MCP5100 polarimeter at 20 °C with a sodium D-line (589 nm) and a cuvette of 10 cm path length in the indicated solvents. Proton (<sup>1</sup>H) or Carbon (<sup>13</sup>C) nuclear magnetic resonance (NMR) spectra were recorded on a Bruker<sup>®</sup> AvanceNeo 500 or Bruker<sup>®</sup> Avance 600 spectrometer at 298 K. NMR spectra were referenced to tetramethylsilane (TMS) as an internal standard. Multiplets (multiplicity s=singlet, d=doublet, t=triplet, q=quartet, m=multiplet) are listed according to chemical shift, coupling constants are given in Hertz (Hz). Full assignment of the signals was achieved by using 2D NMR techniques (<sup>1</sup>H-<sup>1</sup>H COSY, <sup>1</sup>H-<sup>1</sup>H TOCSY, <sup>1</sup>H-<sup>1</sup>H NOESY, <sup>1</sup>H-<sup>13</sup>C HMBC and <sup>1</sup>H-<sup>13</sup>C HSQC). HR-ESI mass spectra were recorded on a ThermoFischer Orbitrap using MeCN, MeOH, CH<sub>2</sub>Cl<sub>2</sub> or a solvent mixture of MeCN/H<sub>2</sub>O-80/20 with 1.3 mM ammonium formate additive as a solvent.

## 2. Synthesis of Oligosaccharides

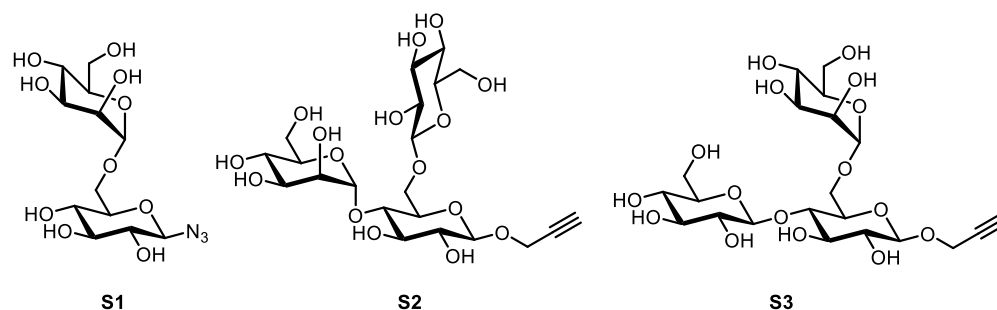

**Figure S1.** Literature-known saccharides **S1**,<sup>[1]</sup> **S2**<sup>[2]</sup> and **S3**<sup>[2]</sup> were synthesized according to literature procedures and utilized in the biological assay.

### 2.1. 2,3-Di-O-acetyl-4,6-O-benzyliden-β-D-glucopyranosyl azide (**2**)<sup>[3]</sup>

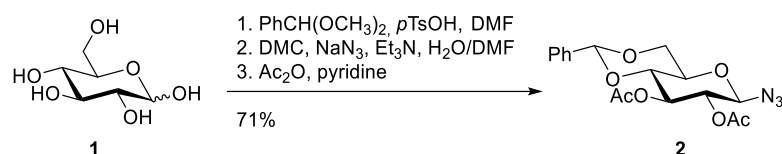

D-Glucose (**1**) (5.00 g, 27.8 mmol, 1 equiv) was suspended in dry DMF (114 mL). Benzaldehyde dimethyl acetal (6.27 mL, 41.6 mmol, 1.5 equiv) and a catalytic amount of *p*-toluenesulfonic acid monohydrate (52.8 mg, 278 μmol, 0.01 equiv) were added and the reaction mixture was stirred under vacuum (100 mbar) at 60 °C for 6 h. Afterwards, triethylamine (38.5 mL, 278 mmol, 10 equiv) and water (114 mL) were added at room temperature. The reaction mixture was cooled to 0 °C and first sodium azide (18.0 g, 278 mmol, 10 eq.), then 2-chloro-1,3-dimethylimidazolinium chloride (DMC, 14.1 g, 83.3 mmol, 3 equiv) were added. The reaction mixture was stirred and allowed to warm to room temperature slowly over a period of 18 h. Afterwards, the reaction mixture was extracted with ethyl acetate (800 mL and 100 mL subsequently), the organic phases were combined and the solvent was removed under reduced pressure. The residue was co-evaporated with toluene (10 mL) and purified on silica gel via flash chromatography (cyclohexane:ethyl acetate, 3:1 → 1:1). To the crude intermediate pyridine (20 mL) and acetic anhydride (10 mL, 106 mmol, 3.8 equiv) were added and stirred at room temperature for 18 h. The solvent was removed under reduced pressure and co-evaporated with toluene (20 mL). The crude was recrystallized from acetone:water (31 mL:14 mL) to yield the product **2**<sup>[3]</sup> as a colorless solid (7.42 g, 19.7 mmol, 71%).

$R_F$  (cyclohexane:ethyl acetate, 3:1) = 0.60.

$[\alpha]_D^{20} = -75.7$  ( $c = 1.04$  in  $\text{CHCl}_3$ ).

**IR (ATR):**  $\tilde{\nu} = 2941$  (w), 2116 (m), 1748 (s), 1394 (m), 1373 (m), 1268 (m), 1235 (s), 1215 (s), 1097 (m), 1075 (s), 1031 (s), 1008 (s), 967 (s), 759 (m), 696 (m)  $\text{cm}^{-1}$ .

**<sup>1</sup>H NMR** (500 MHz,  $\text{CDCl}_3$ , 298 K)  $\delta = 7.47 - 7.33$  (m, 5H, Ar-H), 5.52 (s, 1H, H-7), 5.34 (t,  $^3J_{3,4} = ^3J_{2,3} = 9.5$  Hz, 1H, H-3), 4.95 (dd,  $^3J_{2,3} = 9.1$  Hz,  $^3J_{1,2} = 8.9$  Hz, 1H, H-2), 4.74 (d,  $^3J_{1,2} = 8.8$  Hz, 1H, H-1), 4.41 (dd,  $^2J_{6a,6b} = 10.6$  Hz,  $^3J_{5,6a} = 4.9$  Hz, 1H, H-6a), 3.82 (t,  $^2J_{6b,6a} = ^3J_{6b,5} = 10.2$  Hz,



$^1\text{H}$ , H-6b), 3.72 (t,  $^3J_{3,4} = ^3J_{4,5} = 9.6$  Hz, 1H, H-4), 3.63 (td,  $^3J_{4,5} = ^3J_{5,6b} = 9.6$  Hz,  $^3J_{5,6a} = 4.9$  Hz, 1H, H-5), 2.10 (s, 3H, CH<sub>3</sub>), 2.06 (s, 3H, CH<sub>3</sub>) ppm.

**$^{13}\text{C}$  NMR** (126 MHz, CDCl<sub>3</sub>, 298 K)  $\delta$  = 170.2 (C(O)CH<sub>3</sub>), 169.6 (C(O)CH<sub>3</sub>), 136.7 (C-8), 129.4 (C-11), 128.4 (C-10, C-10'), 126.3 (C-9, C-9'), 101.8 (C-7), 88.7 (C-1), 78.2 (C-4), 71.73 (C-2/C-3), 71.69 (C-2/C-3), 68.7 (C-5), 68.4 (C-6), 20.9 (CH<sub>3</sub>), 20.8 (CH<sub>3</sub>) ppm.

**ESI-HRMS:**  $m/z$  = 400.11082 [M+Na]<sup>+</sup> (calculated  $m/z$  = 400.11152).

## 2.2. 2,3-Di-O-acetyl-6-O-benzyl- $\beta$ -D-glucopyranosyl azide (3)

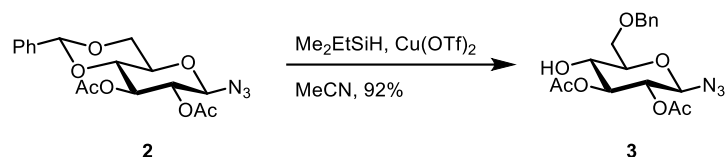

The benzylidene-protected glucosyl azide **2** (3.30 g, 8.74 mmol, 1 equiv) was dissolved in dry acetonitrile (28 mL) under a nitrogen atmosphere. At room temperature, ethyldimethylsilane (2.31 mL, 17.5 mmol, 2 equiv) was added and then cooled to 0°C. Freshly dried (vacuum, ~200°C, 10 min) copper(II) trifluoromethanesulfonate (35 mg, 95.4  $\mu$ mol, 0.01 equiv) was added to the reaction mixture, stirred at 0°C for 1 h and at room temperature for 2 h. Ethyl acetate (70 mL) was added and vigorously stirred under air atmosphere for 2 h. The reaction mixture was washed with satd. aq. NaHCO<sub>3</sub> solution (50 mL) and the separated organic phase was dried over MgSO<sub>4</sub>. It was filtrated and the solvent removed under reduced pressure. The crude was purified on silica gel via automated flash chromatography (cyclohexane:ethyl acetate, 80:20→50:50 over 16 CV) to yield the product **3** as a colorless syrup (3.04 g, 8.01 mmol, 92%).

$R_F$  (cyclohexane:ethyl acetate, 2:1) = 0.29.

$[\alpha]_D^{20}$  = -70.8 ( $c$  = 0.07 in CH<sub>2</sub>Cl<sub>2</sub>).

**IR (ATR):**  $\tilde{\nu}$  = 3457 (br, w), 2870 (w), 2116 (s), 1751 (s), 1367 (m), 1231 (s), 1062 (s), 1032 (s) cm<sup>-1</sup>.

**$^1\text{H}$  NMR** (500 MHz, CDCl<sub>3</sub>, 298 K)  $\delta$  = 7.39 – 7.28 (m, 5H, Ar-H), 5.06 (t,  $^3J_{2,3} = ^3J_{3,4} = 9.5$  Hz, 1H, H-3), 4.88 (dd,  $^3J_{2,3} = 9.6$  Hz,  $^3J_{1,2} = 8.9$  Hz, 1H, H-2), 4.65 – 4.54 (m, 3H, H-1, Ph-CH<sub>2</sub>), 3.86 – 3.75 (m, 3H, H-4, H-6a, H-6b), 3.62 (dt,  $^3J_{4,5} = 9.2$  Hz,  $^3J_{5,6a} = ^3J_{5,6b} = 4.6$  Hz, 1H, H-5), 2.95 (d,  $^3J_{OH,4} = 3.0$  Hz, 1H, OH), 2.09 (s, 3H, CH<sub>3</sub>), 2.08 (s, 3H, CH<sub>3</sub>) ppm.

**$^{13}\text{C}$  NMR** (126 MHz, CDCl<sub>3</sub>, 298 K)  $\delta$  = 171.2 (C(O)CH<sub>3</sub>), 169.5 (C(O)CH<sub>3</sub>), 137.3 (OBn<sub>ipso</sub>), 128.6 (2 Ar-CH), 128.0 (Ar-CH), 127.8 (2 Ar-CH), 87.9 (C-1), 76.4 (C-5), 75.3 (C-3), 73.9 (Ph-CH<sub>2</sub>), 70.7 (C-2), 70.2 (C-4), 69.5 (C-6), 20.8 (CH<sub>3</sub>), 20.6 (CH<sub>3</sub>) ppm.

**ESI-HRMS:**  $m/z$  = 402.12748 [M+Na]<sup>+</sup> (calculated  $m/z$  = 402.12717).

### 2.3. 2,3,4,6-Tetra-O-acetyl- $\beta$ -D-glucopyranosyl-(1 $\rightarrow$ 4)-2,3-di-O-acetyl-6-O-benzyl- $\beta$ -D-glucopyranosyl azide (**4**)

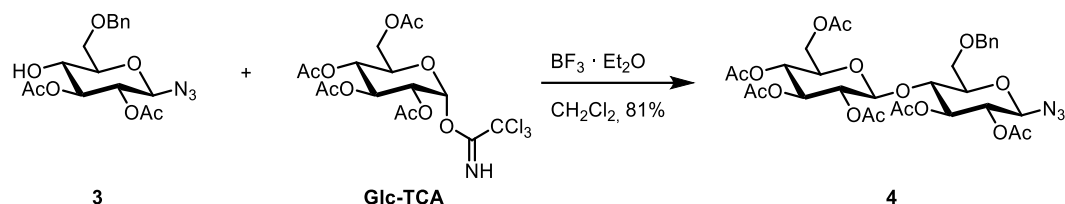

The acceptor glucosyl azide **3** (1.52 g, 4.01 mmol, 1 equiv) was dissolved in dry dichloromethane (6 mL) under a nitrogen atmosphere, freshly activated molecular sieve (3 Å, ~200 mg) was added and a solution of glucosyl donor Glc-TCA (2.37 g, 4.81 mmol, 1.2 equiv) in dry dichloromethane (10 mL) was added. The reaction mixture was stirred at room temperature for 15 min. After cooling to 0 °C boron trifluoride diethyl etherate (102  $\mu$ L, 801  $\mu$ mol, 0.2 equiv) was added and the reaction mixture was stirred at 0 °C for 2 h, followed by stirring at room temperature for 13 h. Triethylamine (500  $\mu$ L, 3.61 mmol, 0.9 equiv) was added and the reaction mixture stirred for 15 min at room temperature, then filtrated over celite. The solvent was removed under reduced pressure and the crude product was purified on silica gel via automated flash chromatography (cyclohexane:ethyl acetate, 80:20 $\rightarrow$ 66:33) to yield the product **4** as a colorless amorphous solid (2.30 g, 3.25 mmol, 81%).

$R_F$  (cyclohexane:ethyl acetate, 2:1) = 0.16.

$[\alpha]_D^{20} = -27.5$  ( $c = 0.76$  in  $\text{CH}_2\text{Cl}_2$ ).

**IR (ATR):**  $\tilde{\nu} = 2942$  (w), 2119 (m), 1745 (s), 1367 (m), 1211 (s), 1035 (s), 904 (m), 599 (m)  $\text{cm}^{-1}$ .

**$^1\text{H}$  NMR** (500 MHz,  $\text{CDCl}_3$ , 298 K)  $\delta = 7.47 - 7.33$  (m, 5H, Ar-H), 5.13 (t,  $^3J_{2,3} = ^3J_{3,4} = 9.5$  Hz, 1H, H-3 $_{\text{Glc}}$ ), 5.05 – 4.96 (m, 2H, H-3 $_{\text{Glc}'}$ , H-4 $_{\text{Glc}'}$ ), 4.89 (dd,  $^3J_{2,3} = 9.7$  Hz,  $^3J_{1,2} = 8.8$  Hz, 1H, H-2 $_{\text{Glc}}$ ), 4.84 (dd,  $^3J_{2,3} = 9.4$  Hz,  $^3J_{1,2} = 8.1$  Hz, 1H, H-2 $_{\text{Glc}'}$ ), 4.78 (d,  $^2J = 12.0$  Hz, 1H, Ph-CHH'), 4.57 (d,  $^3J_{1,2} = 8.8$  Hz, 1H, H-1 $_{\text{Glc}}$ ), 4.50 (d,  $^2J = 12.0$  Hz, 1H, Ph-CHH'), 4.47 (d,  $^3J_{1,2} = 8.1$  Hz, 1H, H-1 $_{\text{Glc}'}$ ), 4.33 (dd,  $^2J_{6a,6b} = 12.5$  Hz,  $^3J_{5,6a} = 4.3$  Hz, 1H, H-6 $_{\text{Glc}'}$ ), 4.03 – 3.95 (m, 2H, H-4 $_{\text{Glc}}$ , H-6b $_{\text{Glc}'}$ ), 3.76 (m, 2H, H-6a $_{\text{Glc}}$ , H-6b $_{\text{Glc}}$ ), 3.54 – 3.49 (m, 1H, H-5 $_{\text{Glc}}$ ), 3.42 (ddd,  $^3J_{4,5} = 9.9$  Hz,  $^3J_{5,6a} = 4.3$  Hz,  $^3J_{5,6b} = 2.1$  Hz, 1H, H-5 $_{\text{Glc}'}$ ), 2.07, 2.06, 2.02, 2.00, 1.98, 1.94 (each s, each 3H, 6  $\text{CH}_3$ ) ppm.

**$^{13}\text{C}$  NMR** (126 MHz,  $\text{CDCl}_3$ , 298 K)  $\delta = 170.6$ , 170.4, 170.0, 169.6, 169.5, 168.9 (6  $\text{C}(\text{O})\text{CH}_3$ ), 137.6 (Ar- $\text{C}_{\text{quart}}$ ), 128.9, 128.9, 128.4, 128.3, 128.3 (5 Ar- $\text{CH}$ ), 100.2 (C-1 $_{\text{Glc}'}$ ), 88.2 (C-1 $_{\text{Glc}}$ ), 77.0 (C-5 $_{\text{Glc}}$ ), 74.6 (C-4 $_{\text{Glc}}$ ), 73.9 (Ph- $\text{CH}_2$ ), 73.2 (C-3 $_{\text{Glc'}}$ /C-4 $_{\text{Glc'}}$ ), 72.5 (C-3 $_{\text{Glc}}$ ), 71.9 (C-5 $_{\text{Glc'}}$ ), 71.7 (C-2 $_{\text{Glc'}}$ ), 71.0 (C-2 $_{\text{Glc}}$ ), 68.0 (C-3 $_{\text{Glc'}}$ /C-4 $_{\text{Glc'}}$ ), 66.9 (C-6 $_{\text{Glc}}$ ), 61.7 (C-6 $_{\text{Glc'}}$ ), 20.8, 20.8, 20.8, 20.7, 20.7, 20.6 (6  $\text{CH}_3$ ) ppm.

**ESI-HRMS:**  $m/z = 710.23937$  [ $\text{M}+\text{Na}$ ] $^+$  (calculated  $m/z = 710.24031$ ).

## 2.4. 2,3,4,6-Tetra-O-acetyl- $\alpha$ -D-mannopyranosyl-(1 $\rightarrow$ 4)-2,3-di-O-acetyl-6-O-benzyl- $\beta$ -D-glucopyranosyl azide (**5**)

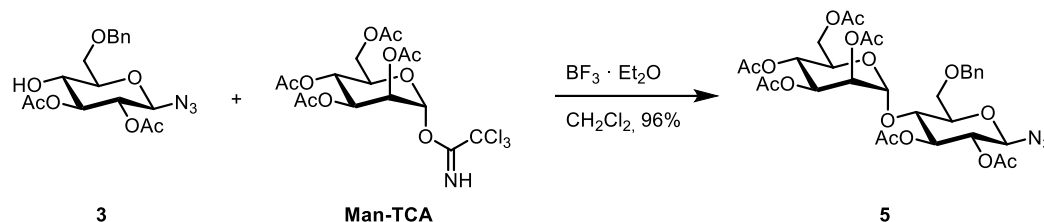

The acceptor glucosyl azide **3** (1.52 g, 4.01 mmol, 1 equiv) was dissolved in dry dichloromethane (6 mL) under a nitrogen atmosphere, freshly activated molecular sieve (3Å, ~200 mg) was added and a solution of mannosyl donor Man-TCA (2.37 g, 4.81 mmol, 1.2 equiv) in dry dichloromethane (10 mL) was added. The reaction mixture was stirred at room temperature for 15 min. After cooling to 0 °C boron trifluoride diethyl etherate (102  $\mu$ L, 801  $\mu$ mol, 0.2 equiv) was added and the reaction mixture was stirred at 0 °C for 2 h, followed by stirring at room temperature for 13 h. Triethylamine (500  $\mu$ L, 3.61 mmol, 0.9 equiv) was added and the reaction mixture stirred for 15 min at room temperature, then filtrated over celite. The solvent was removed under reduced pressure and the crude product was purified on silica gel via automated flash chromatography (cyclohexane:ethyl acetate, 80:20 $\rightarrow$ 66:33) to yield the product **5** as a pale yellow oil (2.74 g, 3.86 mmol, 96%).

$R_F$  (cyclohexane:ethyl acetate, 2:1) = 0.17.

$[\alpha]_D^{20}$  = -11.5 ( $c$  = 0.09 in  $\text{CH}_2\text{Cl}_2$ ).

**IR (ATR):**  $\tilde{\nu}$  = 2119 (m), 1754 (m), 1371 (w), 971 (s), 751 (m)  $\text{cm}^{-1}$ .

**$^1\text{H}$  NMR** (500 MHz,  $\text{CDCl}_3$ , 298 K)  $\delta$  = 7.37 – 7.27 (m, 5H, Ar-H), 5.27 – 5.17 (m, 3H, H-3<sub>Glc</sub>, H-3<sub>Man</sub>, H-4<sub>Man</sub>), 5.05 (dd,  $^3J_{1,2}$  = 1.9 Hz,  $^3J_{2,3}$  = 3.2 Hz, 1H, H-2<sub>Man</sub>), 5.03 (d,  $^3J_{1,2}$  = 1.9 Hz, 1H, H-1<sub>Man</sub>), 4.83 (dd,  $^3J_{1,2}$  = 8.8 Hz,  $^3J_{2,3}$  = 9.6 Hz, 1H, H-2<sub>Glc</sub>), 4.66 – 4.57 (m, 3H, Ph-CH<sub>2</sub>, H-1<sub>Glc</sub>), 4.17 (dd,  $^2J_{6a,6b}$  = 12.4 Hz,  $^3J_{5,6a}$  = 5.2 Hz, 1H, H-6a<sub>Man</sub>), 4.01 – 3.93 (m, 3H, H-4<sub>Glc</sub>, H-5<sub>Man</sub>, H-6b<sub>Man</sub>), 3.87 – 3.78 (m, 2H, H-6a<sub>Glc</sub>, H-6b<sub>Glc</sub>), 3.66 (ddd,  $^3J_{4,5}$  = 9.7 Hz,  $^3J_{5,6a}$  = 4.0 Hz,  $^3J_{5,6b}$  = 2.1 Hz, 1H, H-5<sub>Glc</sub>), 2.13, 2.08, 2.07, 2.05, 2.03, 1.98 (each s, each 3H, 6 CH<sub>3</sub>) ppm.

**$^{13}\text{C}$  NMR** (151 MHz,  $\text{CDCl}_3$ , 298 K)  $\delta$  = 170.6 ( $\underline{\text{C}}(\text{O})\text{CH}_3$ ), 170.3 ( $\underline{\text{C}}(\text{O})\text{CH}_3$ ), 170.0 ( $\underline{\text{C}}(\text{O})\text{CH}_3$ ), 169.79 ( $\underline{\text{C}}(\text{O})\text{CH}_3$ ), 169.75 ( $\underline{\text{C}}(\text{O})\text{CH}_3$ ), 169.68 ( $\underline{\text{C}}(\text{O})\text{CH}_3$ ), 137.9 (Ar- $\underline{\text{C}}_{\text{ipso}}$ ), 128.6 (2 Ar- $\underline{\text{CH}}$ ), 128.0 (Ar- $\underline{\text{CH}}$ ), 127.8 (2 Ar- $\underline{\text{CH}}$ ), 99.4 (C-1<sub>Man</sub>), 87.8 (C-1<sub>Glc</sub>), 77.0 (C-5<sub>Glc</sub>), 76.1 (C-4<sub>Glc</sub>), 74.2\*, 73.8 (Ph- $\underline{\text{CH}}_2$ ), 71.5 (C-2<sub>Glc</sub>), 69.8 (C-2<sub>Man</sub>, C-5<sub>Man</sub>), 68.6 (C-3<sub>Man</sub>), 68.2 (C-6<sub>Glc</sub>), 65.9\*, 62.5 (C-6<sub>Man</sub>), 20.96, 20.88, 20.86, 20.83, 20.76, 20.76 (6 CH<sub>3</sub>) ppm.

\*Assignment is ambiguous due to signal overlap (C-3<sub>Glc</sub>, C-4<sub>Man</sub>).

**ESI-HRMS:**  $m/z$  = 727.26590 [ $\text{M}+\text{NH}_4$ ]<sup>+</sup> (calculated  $m/z$  = 727.26686).

## 2.5. 2,3,4,6-Tetra-O-acetyl- $\beta$ -D-glucopyranosyl-(1 $\rightarrow$ 4)-2,3-di-O-acetyl- $\beta$ -D-glucopyranosyl azide (**6**)

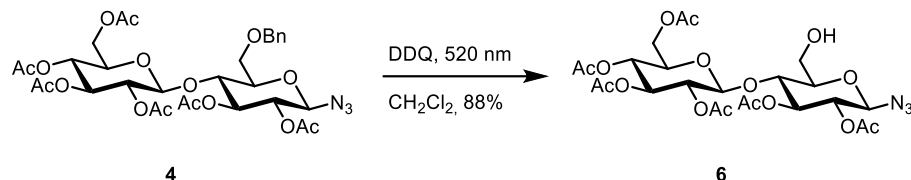

Following the procedure from Cavedon<sup>[4]</sup> et al., the disaccharide **4** (2.30 g, 3.24 mmol, 1 equiv) and 2,3-dichloro-5,6-dicyano-1,4-benzoquinone (1.10 g, 4.86 mmol, 1.5 equiv) were dissolved in dry dichloromethane (166 mL) under a nitrogen atmosphere and water (1.7 mL) was added. During strong stirring the reaction mixture was irradiated with 520 nm green light for 7 h at room temperature. The reaction mixture was diluted with dichloromethane (200 mL) and washed with satd. aq. NaHCO<sub>3</sub> solution (200 mL). The aq. phase was extracted with dichloromethane (100 mL). All organic phases were combined and dried over MgSO<sub>4</sub>, filtrated and the solvent was removed under reduced pressure. The crude was purified on silica gel via automated flash chromatography (cyclohexane:ethyl acetate, 80:20 $\rightarrow$ 45:55) to yield the product **6** as a colorless amorphous solid (1.77 g, 2.86 mmol, 88%).

$R_F$  (cyclohexane:ethyl acetate, 1:1) = 0.24.

$[\alpha]_D^{20} = -36.7$  ( $c = 0.28$  in CH<sub>2</sub>Cl<sub>2</sub>).

**IR (ATR):**  $\tilde{\nu} = 2119$  (m), 1742 (s), 1369 (m), 1219 (s), 1039 (s), 904 (m), 601 (m) cm<sup>-1</sup>.

**<sup>1</sup>H NMR** (500 MHz, CDCl<sub>3</sub>, 298 K)  $\delta = 5.22 - 5.13$  (m, 2H, H-3<sub>Glc</sub>, H-3<sub>Glc'</sub>), 5.07 (t,  $^3J_{3,4} = ^3J_{4,5} = 9.7$  Hz, 1H, H-4<sub>Glc'</sub>), 4.93 (dd,  $^3J_{2,3} = 9.5$  Hz,  $^3J_{1,2} = 8.1$  Hz, 1H, H-2<sub>Glc'</sub>), 4.85 (dd,  $^3J_{2,3} = 9.7$  Hz,  $^3J_{1,2} = 8.9$  Hz, 1H, H-2<sub>Glc</sub>), 4.66 – 4.63 (m, 2H, H-1<sub>Glc</sub>, H-1<sub>Glc'</sub>), 4.37 (dd,  $^2J_{6a,6b} = 12.5$  Hz,  $^3J_{5,6a} = 4.3$  Hz, 1H, H-6a<sub>Glc'</sub>), 4.04 (dd,  $^2J_{6b,6a} = 12.5$  Hz,  $^3J_{5,6b} = 2.2$  Hz, 1H, H-6b<sub>Glc'</sub>), 4.01 – 3.92 (m, 2H, H-4<sub>Glc</sub>, H-6a<sub>Glc</sub>), 3.84 – 3.76 (m, 1H, H-6b<sub>Glc</sub>), 3.69 (ddd,  $^3J_{4,5} = 9.7$  Hz,  $^3J_{5,6a} = 4.3$  Hz,  $^3J_{5,6b} = 2.2$  Hz, 1H, H-5<sub>Glc'</sub>), 3.48 (dt,  $^3J_{4,5} = 9.7$  Hz,  $^3J_{5,6a} = ^3J_{5,6b} = 2.4$  Hz, 1H, H-5<sub>Glc</sub>), 1.92 (m, 1H, OH), 2.08, 2.07, 2.04, 2.02, 2.01, 1.98 (each s, each 3H, 6 CH<sub>3</sub>) ppm.

**<sup>13</sup>C NMR** (126 MHz, CDCl<sub>3</sub>, 298 K)  $\delta = 170.7$ , 170.4, 170.0, 169.6, 169.5, 169.1 (6  $\underline{C}(O)CH_3$ ), 100.7 (C-1<sub>Glc'</sub>), 88.2 (C-1<sub>Glc</sub>), 77.3 (C-5<sub>Glc</sub>), 74.6 (C-4<sub>Glc</sub>), 73.1 (C-3<sub>Glc/Glc'</sub>), 72.5 (C-3<sub>Glc/Glc'</sub>), 72.1 (C-5<sub>Glc'</sub>), 71.8 (C-2<sub>Glc'</sub>), 71.1 (C-2<sub>Glc</sub>), 67.9 (C-4<sub>Glc'</sub>), 61.7 (C-6<sub>Glc'</sub>), 60.1 (C-6<sub>Glc</sub>), 20.8, 20.8, 20.8, 20.7, 20.7, 20.6 (6 CH<sub>3</sub>) ppm.

**ESI-HRMS:**  $m/z = 642.17472$  [M+Na]<sup>+</sup> (calculated  $m/z = 642.17530$ ).

## 2.6. 2,3,4,6-Tetra-O-acetyl- $\alpha$ -D-mannopyranosyl-(1 $\rightarrow$ 4)-2,3-di-O-acetyl- $\beta$ -D-glucopyranosyl azide (**7**)

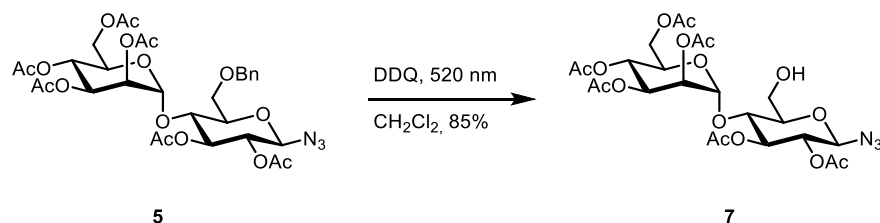

Following the procedure from Cavedon<sup>[4]</sup> et al., the disaccharide **5** (2.74 g, 3.86 mmol, 1 equiv) and 2,3-dichloro-5,6-dicyano-1,4-benzoquinone (1.32 g, 5.79 mmol, 1.5 equiv) were dissolved in dry dichloromethane (198 mL) under a nitrogen atmosphere and water (2 mL) was added. During strong stirring the reaction mixture was irradiated with 520 nm green light for 7 h at room temperature. The reaction mixture was diluted with dichloromethane (200 mL) and washed with satd. aq. NaHCO<sub>3</sub> solution (200 mL). The aq. phase was extracted with dichloromethane (100 mL). All organic phases were combined and dried over MgSO<sub>4</sub>, filtrated and the solvent was removed under reduced pressure. The crude was purified on silica gel via automated flash chromatography (cyclohexane:ethyl acetate, 80:20 $\rightarrow$ 45:55) to yield the product **7** as a colorless foam (2.04 g, 3.29 mmol, 85%).

$R_F$  (cyclohexane:ethyl acetate, 1:1) = 0.37.

$[\alpha]_D^{20} = -13.2$  ( $c = 0.44$  in CH<sub>2</sub>Cl<sub>2</sub>).

**IR (ATR):**  $\tilde{\nu} = 3504$  (w), 2942 (w), 2119 (m), 1743 (s), 1369 (m), 1231 (s), 1036 (s) cm<sup>-1</sup>.

**<sup>1</sup>H NMR** (500 MHz, CDCl<sub>3</sub>, 298 K)  $\delta = 5.28$  (t,  $^3J_{2,3} = ^3J_{3,4} = 9.5$  Hz, 1H, H-3<sub>Glc</sub>), 5.26 – 5.19 (m, 2H, H-4<sub>Man</sub>, H-3<sub>Man</sub>), 5.06 (d,  $^3J_{1,2} = 2.1$  Hz, 1H, H-1<sub>Man</sub>), 5.03 (t,  $^3J_{1,2} = ^3J_{2,3} = 2.5$  Hz, 1H, H-2<sub>Man</sub>), 4.81 (dd,  $^3J_{1,2} = 8.8$  Hz,  $^3J_{2,3} = 9.5$  Hz, 1H, H-2<sub>Glc</sub>), 4.70 (d,  $^3J_{1,2} = 8.8$  Hz, 1H, H-1<sub>Glc</sub>), 4.23 (dd,  $^2J_{6a,6b} = 12.2$  Hz,  $^3J_{5,6a} = 6.5$  Hz, 1H, H-6a<sub>Man</sub>), 4.14 (dd,  $^2J_{6b,6a} = 12.2$  Hz,  $^3J_{5,6b} = 2.4$  Hz, 1H, H-6b<sub>Man</sub>), 4.07 – 3.95 (m, 2H, H-6a<sub>Glc</sub>, H-5<sub>Man</sub>), 4.01 (t,  $^3J_{4,5} = ^3J_{3,4} = 9.5$  Hz, 1H, H-4<sub>Glc</sub>), 3.88 (dd,  $^2J_{6b,6a} = 12.8$  Hz,  $^3J_{5,6b} = 3.7$  Hz, 1H, H-6b<sub>Glc</sub>), 3.58 (ddd,  $^3J_{4,5} = 9.7$  Hz,  $^3J_{5,6a} = 3.7$  Hz,  $^3J_{5,6b} = 2.0$  Hz, 1H, H-5<sub>Glc</sub>), 2.13, 2.12, 2.09, 2.07, 2.05, 2.00 (each s, each 3H, 6 CH<sub>3</sub>), 1.63 (s, 1H, OH) ppm.

**<sup>13</sup>C NMR** (126 MHz, CDCl<sub>3</sub>, 298 K)  $\delta = 170.8, 170.3, 170.0, 169.8, 169.8, 169.6$  (6 C(O)CH<sub>3</sub>), 99.4 (C-1<sub>Man</sub>), 88.0 (C-1<sub>Glc</sub>), 76.9 (C-5<sub>Glc</sub>), 75.4 (C-4<sub>Glc</sub>), 74.3 (C-3<sub>Glc</sub>), 71.5 (C-2<sub>Glc</sub>), 70.1 (C-5<sub>Man</sub>), 69.9 (C-2<sub>Man</sub>), 68.4 (C-3<sub>Man</sub>), 66.3 (C-4<sub>Man</sub>), 63.0 (C-6<sub>Man</sub>), 61.2 (C-6<sub>Glc</sub>), 20.9, 20.8, 20.8, 20.8, 20.8, 20.7 (6 CH<sub>3</sub>) ppm.

**ESI-HRMS:**  $m/z = 642.17513$  [M+Na]<sup>+</sup> (calculated  $m/z = 642.17530$ ).

**2.7. 2,3,4,6-Tetra-O-acetyl- $\beta$ -D-glucopyranosyl-(1 $\rightarrow$ 4)-[2,3,4,6-tetra-O-acetyl- $\alpha$ -D-mannopyranosyl-(1 $\rightarrow$ 6)]-2,3-di-O-acetyl- $\beta$ -D-glucopyranosyl azide (**8**)**

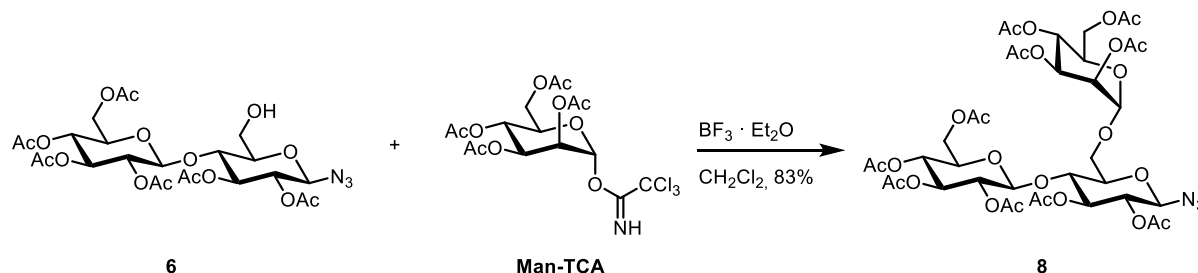

The acceptor disaccharide **6** (1.77 g, 2.86 mmol, 1 equiv) and the mannosyl donor Man-TCA (1.69 g, 3.43 mmol, 1.2 equiv) were dissolved in dry dichloromethane (11.5 mL) under a nitrogen atmosphere, freshly activated molecular sieve (3Å, ~500 mg) was added and the reaction mixture was stirred at room temperature for 20 min. After cooling to 0 °C boron trifluoride diethyl etherate (72  $\mu$ L, 571  $\mu$ mol, 0.2 equiv) was added and the reaction mixture was stirred at 0 °C for 2 h, followed by stirring at room temperature for 21 h. Triethylamine (500  $\mu$ L, 3.61 mmol, 0.9 equiv) was added and the reaction mixture stirred for 15 min at room temperature, then filtrated over celite and diluted with dichloromethane (90 mL). The organic phase was washed with brine (30 mL) and the separated aq. phase was extracted with dichloromethane (30 mL). The combined org. phases were dried over  $\text{MgSO}_4$ , filtrated and the solvent was removed under reduced pressure. The crude product was purified on silica gel via automated flash chromatography (cyclohexane:ethyl acetate, 90:10 $\rightarrow$ 45:55) to yield the product **8** as a colorless foam (2.24 g, 2.36 mmol, 83%).

$R_F$  (cyclohexane:ethyl acetate, 1:1) = 0.22.

$[\alpha]_D^{20} = +0.80$  ( $c = 0.49$  in  $\text{CH}_2\text{Cl}_2$ ).

**IR (ATR):**  $\tilde{\nu} = 2942$  (w), 2122 (m), 1741 (s), 1367 (m), 1209 (s), 1035 (s), 904 (m), 601 (m)  $\text{cm}^{-1}$ .

**$^1\text{H}$  NMR** (500 MHz,  $\text{CDCl}_3$ , 298 K)  $\delta = 5.42 - 5.32$  (m, 2H, H-3<sub>Man</sub>, H-4<sub>Man</sub>), 5.29 (dd,  $^3J_{2,3} = 3.2$  Hz,  $^3J_{1,2} = 1.8$  Hz, 1H, H-2<sub>Man</sub>), 5.21 (t,  $^3J_{3,4} = ^3J_{2,3} = 9.5$  Hz, 1H, H-3<sub>Glc'</sub>), 5.18 (t,  $^3J_{3,4} = ^3J_{2,3} = 9.5$  Hz, 1H, H-3<sub>Glc</sub>), 5.11 (t,  $^3J_{4,5} = ^3J_{3,4} = 9.8$  Hz, 1H, H-4<sub>Glc'</sub>), 5.04 (d,  $^3J_{1,2} = 1.7$  Hz, 1H, H-1<sub>Man</sub>), 4.95 (dd,  $^3J_{2,3} = 9.5$  Hz,  $^3J_{1,2} = 8.2$  Hz, 1H, H-2<sub>Glc'</sub>), 4.92 – 4.88 (m, 1H, H-2<sub>Glc</sub>), 4.68 (d,  $^3J_{1,2} = 8.1$  Hz, 1H, H-1<sub>Glc'</sub>), 4.57 (d,  $^3J_{1,2} = 8.9$  Hz, 1H, H-1<sub>Glc</sub>), 4.49 (dd,  $^2J_{6a,6b} = 12.8$  Hz,  $^3J_{5,6a} = 3.8$  Hz, 1H, H-6a<sub>Glc'</sub>), 4.40 (dd,  $^2J_{6a,6b} = 12.4$  Hz,  $^3J_{5,6a} = 4.3$  Hz, 1H, H-6a<sub>Man</sub>), 4.17 (dd,  $^2J_{6b,6a} = 12.4$  Hz,  $^3J_{5,6b} = 2.5$  Hz, 1H, H-6b<sub>Man</sub>), 4.12 – 4.06 (m, 2H, H-5<sub>Man</sub>, H-6b<sub>Glc'</sub>), 3.96 – 3.86 (m, 4H, H-4<sub>Glc</sub>, H-5<sub>Glc'</sub>, H-6a<sub>Glc</sub>, H-6b<sub>Glc</sub>), 3.60 (ddd,  $^3J_{4,5} = 10.0$  Hz,  $^3J_{5,6a} = 2.9$  Hz,  $^3J_{5,6b} = 1.3$  Hz, 1H, H-5<sub>Glc</sub>), 2.18, 2.12, 2.08, 2.08, 2.07, 2.05, 2.04, 2.02, 1.98, 1.98 (each s, each 3H, 10  $\text{CH}_3$ ) ppm.

**$^{13}\text{C}$  NMR** (126 MHz,  $\text{CDCl}_3$ , 298 K)  $\delta = 170.6$ , 170.6, 170.3, 170.0, 169.9, 169.9, 169.7, 169.3, 169.2, 168.6 (10  $\text{C}(\text{O})\text{CH}_3$ ), 100.3 (C-1<sub>Glc'</sub>), 98.2 (C-1<sub>Man</sub>), 88.0 (C-1<sub>Glc</sub>), 76.4 (C-5<sub>Glc</sub>), 74.8 (C-5<sub>Glc'</sub>), 72.9 (C-3<sub>Glc'</sub>), 72.0 (C-4<sub>Glc</sub>), 71.9 (C-3<sub>Glc</sub>), 71.9 (C-2<sub>Glc'</sub>), 70.7 (C-2<sub>Glc</sub>), 69.2 (C-5<sub>Man</sub>), 69.0 (C-2<sub>Man</sub>), 68.7 (C-3<sub>Man</sub>/C-4<sub>Man</sub>), 67.4 (C-4<sub>Glc'</sub>), 65.9 (C-3<sub>Man</sub>/C-4<sub>Man</sub>), 65.0 (C-6<sub>Glc</sub>), 62.1 (C-6<sub>Man</sub>), 61.3 (C-6<sub>Glc'</sub>), 20.8, 20.7, 20.7, 20.7, 20.7, 20.6, 20.5, 20.5, 20.5, 20.4 (10  $\text{CH}_3$ ) ppm.

**ESI-HRMS:**  $m/z = 927.26964$  [ $\text{M}+\text{Na}$ ] $^+$  (calculated  $m/z = 972.27038$ ).

**2.8. 2,3,4,6-Tetra-O-acetyl- $\alpha$ -D-mannopyranosyl-(1 $\rightarrow$ 4)-[2,3,4,6-tetra-O-acetyl- $\beta$ -D-glucopyranosyl-(1 $\rightarrow$ 6)]-2,3-di-O-acetyl- $\beta$ -D-glucopyranosyl azide (**9**)**

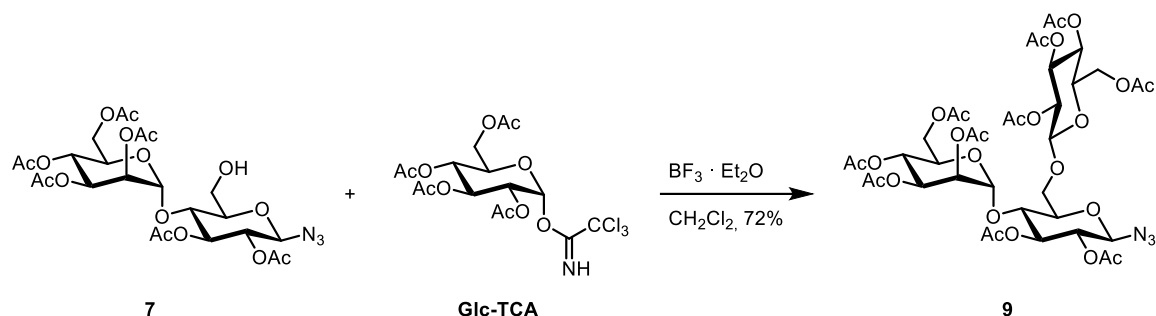

The acceptor disaccharide **7** (2.04 g, 3.29 mmol, 1 equiv) and the glucosyl donor Glc-TCA (1.95 g, 3.95 mmol, 1.2 equiv) were dissolved in dry dichloromethane (13 mL) under a nitrogen atmosphere, freshly activated molecular sieve (3Å, ~500 mg) was added and the reaction mixture was stirred at room temperature for 20 min. After cooling to 0 °C boron trifluoride diethyl etherate (84  $\mu$ L, 659  $\mu$ mol, 0.2 equiv) was added and the reaction mixture was stirred at 0 °C for 2 h, followed by stirring at room temperature for 21 h. Triethylamine (500  $\mu$ L, 3.61 mmol, 0.9 equiv) was added and the reaction mixture stirred for 15 min at room temperature, then filtrated over celite and diluted with dichloromethane (90 mL). The organic phase was washed with brine (30 mL) and the separated aq. phase was extracted with dichloromethane (30 mL). The combined org. phases were dried over  $\text{MgSO}_4$ , filtrated and the solvent was removed under reduced pressure. The crude product was purified on silica gel via automated flash chromatography (cyclohexane:ethyl acetate, 90:10 $\rightarrow$ 45:55) to yield the product **9** as a colorless foam (2.26 g, 2.38 mmol, 72%).

$R_F$  (cyclohexane:ethyl acetate, 4:6) = 0.31.

$[\alpha]_D^{20} = -13.0$  ( $c = 0.35$  in  $\text{CH}_2\text{Cl}_2$ ).

**IR (ATR):**  $\tilde{\nu} = 2120$  (m), 1743 (s), 1434 (w), 1368 (m), 1211 (s), 1136 (m), 1035 (s), 901 (m), 601 (m)  $\text{cm}^{-1}$ .

**$^1\text{H}$  NMR** (500 MHz,  $\text{CDCl}_3$ , 298 K)  $\delta = 5.29 - 5.17$  (m, 4H, H-3<sub>Man</sub>, H-3<sub>Glc</sub>, H-3<sub>Glc'</sub>, H-4<sub>Man</sub>), 5.11 (t,  $^3J_{3,4} = ^3J_{4,5} = 9.7$  Hz, 1H, H-4<sub>Glc'</sub>), 5.06 – 4.97 (m, 2H, H-2<sub>Man</sub>, H-2<sub>Glc'</sub>), 4.91 (d,  $^3J_{1,2} = 1.9$  Hz, 1H, H-1<sub>Man</sub>), 4.79 (dd,  $^3J_{2,3} = 9.5$  Hz,  $^3J_{1,2} = 8.8$  Hz, 1H, H-2<sub>Glc</sub>), 4.70 (d,  $^3J_{1,2} = 7.9$  Hz, 1H, H-1<sub>Glc'</sub>), 4.66 (d,  $^3J_{1,2} = 8.8$  Hz, 1H, H-1<sub>Glc</sub>), 4.30 – 4.21 (m, 2H, H-6a<sub>Glc'</sub>, H-6a<sub>Man</sub>), 4.19 – 4.12 (m, 3H, H-6b<sub>Man</sub>, H-6a<sub>Glc</sub>, H-6b<sub>Glc'</sub>), 4.02 (ddd,  $^3J_{4,5} = 9.7$  Hz,  $^3J_{5,6a} = 5.3$  Hz,  $^3J_{5,6b} = 2.4$  Hz, 1H, H-5<sub>Man</sub>), 3.83 (dd,  $^2J_{6b,6a} = 11.7$  Hz,  $^3J_{5,6b} = 5.6$  Hz, 1H, H-6b<sub>Glc</sub>), 3.78 – 3.65 (m, 3H, H-5<sub>Glc</sub>, H-5<sub>Glc'</sub>, H-4<sub>Glc</sub>), 2.14, 2.11, 2.09, 2.09, 2.06, 2.06, 2.06, 2.02, 2.01, 1.99 (each s, each 3H, 10  $\text{CH}_3$ ) ppm.

**$^{13}\text{C}$  NMR** (126 MHz,  $\text{CDCl}_3$ , 298 K)  $\delta = 170.8, 170.6, 170.4, 170.2, 169.9, 169.8, 169.7, 169.6, 169.5, 169.3$  (10  $\text{C}(\text{O})\text{CH}_3$ ), 101.0 (C-1<sub>Glc'</sub>), 100.0 (C-1<sub>Man</sub>), 87.7 (C-1<sub>Glc</sub>), 77.7 (C-4<sub>Glc</sub>), 76.7 (C-5<sub>Glc</sub>), 74.0\*, 72.9\*, 72.1 (C-5<sub>Glc'</sub>), 71.4 (C-2<sub>Glc'</sub>), 71.3 (C-2<sub>Glc</sub>), 69.9 (C-5<sub>Man</sub>), 69.7 (C-2<sub>Man</sub>), 68.5\*, 68.3 (C-4<sub>Glc'</sub>), 68.1 (C-6<sub>Glc</sub>), 65.9\*, 62.4 (C-6<sub>Glc'</sub>/C-6<sub>Man</sub>), 61.8 (C-6<sub>Glc</sub>/C-6<sub>Man</sub>), 20.9, 20.8, 20.8, 20.8, 20.8, 20.7, 20.7, 20.7, 20.7, 20.7 (10  $\text{CH}_3$ ) ppm.

\*Assignment is ambiguous due to signal overlap (C-3<sub>Man</sub>, C-3<sub>Glc</sub>, C-3<sub>Glc'</sub>, C-4<sub>Man</sub>).

**ESI-HRMS:**  $m/z = 950.28809$   $[M+H]^+$  (calculated  $m/z = 950.28844$ ).

**2.9.  $\beta$ -D-Glucopyranosyl-(1 $\rightarrow$ 4)-[ $\alpha$ -D-mannopyranosyl-(1 $\rightarrow$ 6)]- $\beta$ -D-glucopyranosyl azide (10)**

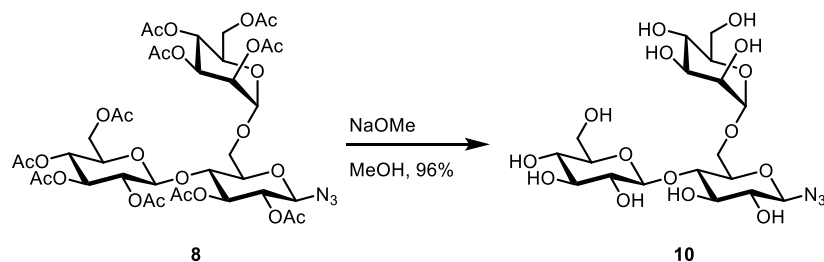

The protected trisaccharide **8** (476 mg, 501  $\mu$ mol, 1 equiv) was suspended in methanol (10 mL) and a solution of sodium methoxide in methanol (25  $\mu$ L, 125  $\mu$ mol, 5 M, 0.25 equiv) was added at room temperature. The reaction mixture was stirred at room temperature for 18 h. It was neutralized by addition of Amberlite®-IRC 120 H<sup>+</sup> resin and stirring for 15 min. The resin was filtered off and the filtrate was concentrated under reduced pressure. The crude was purified on reversed phase silica gel via automated flash chromatography (H<sub>2</sub>O:MeCN, 100:0 1 CV, 100:0  $\rightarrow$  0:100 over 16 CV) to obtain the title compound **10** after lyophilization (255 mg, 482  $\mu$ mol, 96%).

$[\alpha]_D^{20} = +11.4$  ( $c = 0.11$  in MeOH).

**IR (ATR):**  $\tilde{\nu} = 3329$  (m, br), 2920 (w), 2119 (m), 1638 (w), 1369 (w), 1250 (m), 1017 (s), 573 (m)  $\text{cm}^{-1}$ .

**<sup>1</sup>H NMR** (500 MHz, D<sub>2</sub>O, 298 K)  $\delta = 4.92$  (d,  $^3J_{1,2} = 1.7$  Hz, 1H, H-1<sub>Man</sub>), 4.78 (d,  $^3J_{1,2} = 8.7$  Hz, 1H, H-1<sub>Glc</sub>), 4.49 (d,  $^3J_{1,2} = 7.9$  Hz, 1H, H-1<sub>Glc'</sub>), 4.04 – 3.98 (m, 2H, H-2<sub>Man</sub>, H-6a<sub>Man</sub>), 3.94 – 3.87 (m, 3H, H-6a<sub>Glc</sub>, H-6a<sub>Glc'</sub>, H-6b<sub>Man</sub>), 3.84 – 3.62 (m, 8H, H-3<sub>Man</sub>, H-3<sub>Glc'</sub>, H-4<sub>Man</sub>, H-4<sub>Glc'</sub>, H-5<sub>Man</sub>, H-5<sub>Glc'</sub>, H-6b<sub>Glc</sub>, H-6b<sub>Glc'</sub>), 3.53 – 3.44 (m, 2H, H-3<sub>Glc</sub>, H-5<sub>Glc</sub>), 3.43 – 3.37 (m, 1H, H-4<sub>Glc</sub>), 3.33 – 3.27 (m, 2H, H-2<sub>Glc</sub>, H-2<sub>Glc'</sub>) ppm.

**<sup>13</sup>C NMR** (126 MHz, D<sub>2</sub>O, 298 K)  $\delta = 105.3$  (C-1<sub>Glc'</sub>), 103.2 (C-1<sub>Man</sub>), 92.8 (C-1<sub>Glc</sub>), 80.7\*, 78.9 (C-5<sub>Glc'</sub>), 78.2 (C-3<sub>Glc'</sub>), 78.1\*, 76.9 (C-3<sub>Glc</sub>), 75.9 (C-2<sub>Glc/Glc'</sub>), 75.8\*, 75.3 (C-2<sub>Glc/Glc'</sub>), 73.3\*, 72.6 (C-2<sub>Man</sub>), 72.3 (C-4<sub>Glc'</sub>), 69.3\*, 68.3 (C-6<sub>Man</sub>), 63.7 (C-6<sub>Glc/Glc'</sub>), 63.4 (C-6<sub>Glc/Glc'</sub>) ppm.

\*Assignment is ambiguous due to signal overlap (C-3<sub>Man</sub>, C-4<sub>Glc</sub>, C-4<sub>Man</sub>, C-5<sub>Glc</sub>, C-5<sub>Man</sub>).

**ESI-HRMS:**  $m/z = 530.18314$   $[M+H]^+$  (calculated  $m/z = 530.18279$ ).



**2.10.  $\alpha$ -D-Mannopyranosyl-(1 $\rightarrow$ 4)-[ $\beta$ -D-glucopyranosyl-(1 $\rightarrow$ 6)]- $\beta$ -D-glucopyranosyl azide (11)**

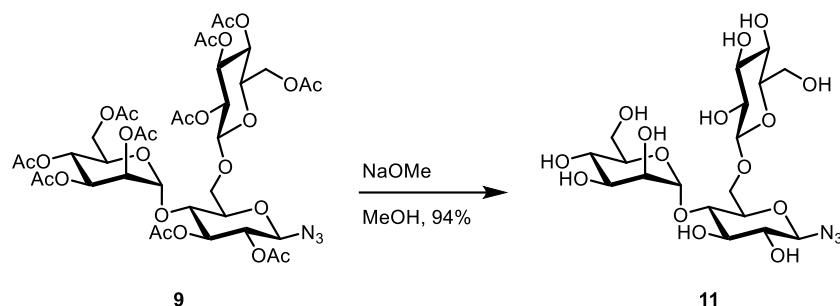

The protected trisaccharide **9** (957 mg, 1.01 mmol, 1 equiv) was suspended in methanol (20 mL) and a solution of sodium methoxide in methanol (100  $\mu$ L, 500  $\mu$ mol, 5 M, 0.5 equiv) was added at room temperature. The reaction mixture was stirred at room temperature for 5 h. It was neutralized by addition of Amberlite<sup>®</sup>-IRC 120 H<sup>+</sup> resin and stirring for 15 min. The resin was filtered off and the filtrate was concentrated under reduced pressure. The crude was purified on reversed phase silica gel via automated flash chromatography (H<sub>2</sub>O:MeCN, 100:0 1 CV, 100:0  $\rightarrow$  0:100 over 16 CV) to obtain the title compound **11** after lyophilization (501 mg, 946  $\mu$ mol, 94%).

$[\alpha]_D^{20} = +20.1$  ( $c = 0.88$  in MeOH).

**IR (ATR):**  $\tilde{\nu} = 3324$  (m, br), 2892 (w), 2119 (m), 1251 (w), 1019 (s), 814 (w)  $\text{cm}^{-1}$ .

**<sup>1</sup>H NMR** (600 MHz, D<sub>2</sub>O, 298 K)  $\delta = 5.21$  (d,  $^3J_{1,2} = 1.7$  Hz, 1H, H-1<sub>Man</sub>), 4.75 (d,  $^3J_{1,2} = 8.8$  Hz, 1H, H-1<sub>Glc</sub>), 4.53 (d,  $^3J_{1,2} = 8.0$  Hz, 1H, H-1<sub>Glc'</sub>), 4.21 (dd,  $^2J_{6a,6b} = 11.5$  Hz,  $^3J_{5,6a} = 1.8$  Hz, 1H, H-6a<sub>Man</sub>), 4.06 (dd,  $^3J_{2,3} = 3.2$  Hz,  $^3J_{1,2} = 2.0$  Hz, 1H, H-2<sub>Man</sub>), 3.93 – 3.86 (m, 3H, H-6a<sub>Glc</sub>, H-6a<sub>Glc'</sub>, H-6b<sub>Man</sub>), 3.81 (m, 2H, H-3<sub>Man</sub>, H-4<sub>Man</sub>), 3.77 – 3.61 (m, 6H, H-3<sub>Glc'</sub>, H-4<sub>Glc'</sub>, H-5<sub>Man</sub>, H-5<sub>Glc'</sub>, H-6b<sub>Glc</sub>, H-6b<sub>Glc'</sub>), 3.49 (t,  $^3J_{3,4} = ^3J_{2,3} = 9.0$  Hz, 1H, H-3<sub>Glc</sub>), 3.46 – 3.37 (m, 2H, H-4<sub>Glc</sub>, H-5<sub>Glc</sub>), 3.32 – 3.25 (m, 2H, H-2<sub>Glc</sub>, H-2<sub>Glc'</sub>) ppm.

**<sup>13</sup>C NMR** (151 MHz, D<sub>2</sub>O, 298 K)  $\delta = 102.8$  (C-1<sub>Glc'</sub>), 101.9 (C-1<sub>Man</sub>), 90.0 (C-1<sub>Glc</sub>), 77.1\*, 76.0\*, 75.9\*, 75.7\*, 75.7\*, 73.9\*, 73.1 (C-2<sub>Glc/Glc'</sub>), 72.8 (C-2<sub>Glc/Glc'</sub>), 70.3\*, 70.2\*, 69.6 (C-4<sub>Glc</sub>), 68.9 (C-6<sub>Man</sub>), 66.6\*, 61.0 (C-6<sub>Glc/Glc'</sub>), 60.7 (C-6<sub>Glc/Glc'</sub>) ppm.

\*Assignment is ambiguous due to signal overlap (C-2<sub>Man</sub>, C-3<sub>Glc</sub>, C-3<sub>Glc'</sub>, C-3<sub>Man</sub>, C-4<sub>Glc'</sub>, C-4<sub>Man</sub>, C-5<sub>Glc</sub>, C-5<sub>Glc'</sub>, C-5<sub>Man</sub>).

**ESI-HRMS:**  $m/z = 552.16449$  [M+Na]<sup>+</sup> (calculated  $m/z = 552.16474$ ).

## 2.11. 2,3-Di-O-acetyl-6-O-benzyl-β-D-galactopyranosyl azide (**13**)

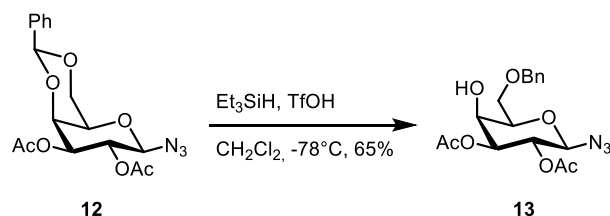

The benzylidene-protected galactosyl azide **12**<sup>[5]</sup> (1.90 g, 5.04 mmol, 1 equiv) was dissolved in dry dichloromethane (34 mL) under nitrogen atmosphere, freshly activated molecular sieve (3Å, ~200 mg) was added and the reaction mixture was stirred at room temperature for 30 min. After cooling to -78 °C triethylsilane (804 μL, 5.04 mmol, 1 equiv) and triflic acid (223 μL, 2.52 mmol, 0.5 equiv) were added and the reaction mixture stirred for 15 min. Afterwards, additional triethylsilane (804 μL, 5.04 mmol, 1 equiv) and triflic acid (223 μL, 2.52 mmol, 0.5 equiv) were added at -78 °C. After 15 min, additional triethylsilane (402 μL, 2.52 mmol, 0.5 equiv) and triflic acid (223 μL, 2.52 mmol, 0.5 equiv) were added and stirred for 15 min. Finally, triflic acid (223 μL, 2.52 mmol, 0.5 equiv) was added and the reaction mixture stirred at -78 °C for further 30 min. It was diluted with dichloromethane (20 mL) and satd. aq. NaHCO<sub>3</sub> solution (50 mL) was added. After strong stirring for 10 min the reaction mixture was filtrated over celite and extracted with dichloromethane (3x50 mL). The combined org. phases were dried over MgSO<sub>4</sub>, filtrated and the solvent was removed under reduced pressure. The crude product was purified on silica gel via automated flash chromatography twice (cyclohexane:ethyl acetate, 9:1→6:4 then toluene:ethyl acetate 90:10→75:25) to yield the product **13** as a viscous light yellow oil (1.25 g, 3.30 mmol, 65%).

$R_F$  (toluene:ethyl acetate, 3:1) = 0.34.

$[\alpha]_D^{20} = -9.8$  ( $c = 1.00$  in CHCl<sub>3</sub>).

**IR (ATR):**  $\tilde{\nu} = 3449$  (br, w), 2875 (w), 2116 (m), 1747 (m), 1368 (m), 1216 (s), 1056 (s), 1003 (m), 781 (w), 738 (m), 698 (m) cm<sup>-1</sup>.

**<sup>1</sup>H NMR** (500 MHz, CDCl<sub>3</sub>, 298 K)  $\delta = 7.39 - 7.28$  (m, 5H, 5 Ar-H), 5.28 (dd,  $^3J_{2,3} = 10.1$  Hz,  $^3J_{1,2} = 8.7$  Hz, 1H, H-2), 4.95 (dd,  $^3J_{2,3} = 10.1$  Hz,  $^3J_{3,4} = 3.1$  Hz, 1H, H-3), 4.63 – 4.54 (m, 3H, H-1, PhCH<sub>2</sub>), 4.20 (t,  $^3J_{3,4} = ^3J_{4,5} = 3.0$  Hz, 1H, H-4), 3.86 – 3.74 (m, 3H, H-5, H-6a, H-6b), 2.83 (d,  $^3J_{4,\text{OH}} = 3.3$  Hz, 1H, OH), 2.10 (s, 3H, OAc), 2.08 (s, 3H, OAc) ppm.

**<sup>13</sup>C NMR** (126 MHz, CDCl<sub>3</sub>, 298 K)  $\delta = 170.1$  (C(O)CH<sub>3</sub>), 169.5 (C(O)CH<sub>3</sub>), 137.3 (OBn<sub>ipso</sub>), 128.6 (2 Ar-CH), 128.0 (Ar-CH), 127.8 (2 Ar-CH), 88.4 (C-1), 75.1 (C-5), 73.9 (PhCH<sub>2</sub>), 73.2 (C-3), 69.1 (C-6), 68.6 (C-2), 68.0 (C-4), 20.8 (CH<sub>3</sub>), 20.7 (CH<sub>3</sub>) ppm.

**ESI-HRMS:**  $m/z = 402.12662$  [M+Na]<sup>+</sup> (calculated  $m/z = 402.12717$ ).

## 2.12. 2,3,4,6-Tetra-O-acetyl- $\beta$ -D-glucopyranosyl-(1 $\rightarrow$ 4)-2,3-di-O-acetyl-6-O-benzyl- $\beta$ -D-galactopyranosyl azide (**14**)

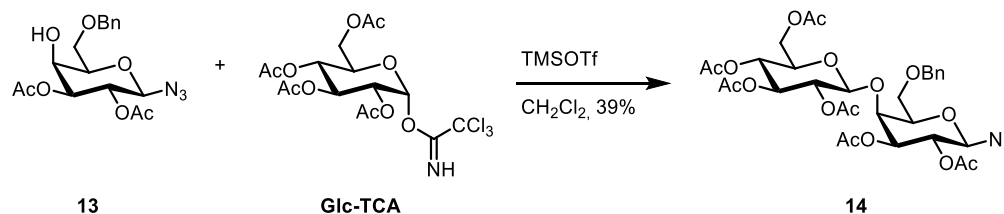

The acceptor galactosyl azide **13** (21.0 mg, 55.4  $\mu\text{mol}$ , 1 equiv) and the glucosyl donor Glc-TCA (40.0 mg, 81.2  $\mu\text{mol}$ , 1.5 equiv) were dissolved in dry dichloromethane (500  $\mu\text{L}$ ) under nitrogen atmosphere, freshly activated molecular sieve (3 $\text{\AA}$ , ~50 mg) was added and the reaction mixture stirred at room temperature for 15 min. At 0  $^\circ\text{C}$  trimethylsilyl trifluoromethanesulfonate (5  $\mu\text{L}$ , 27.7  $\mu\text{mol}$ , 0.5 equiv) was added and the reaction mixture was stirred at 0  $^\circ\text{C}$  for 2 h, followed by stirring at room temperature for 14.5 h. The reaction mixture was diluted with dichloromethane (10 mL) and triethylamine (50  $\mu\text{L}$ ) was added. After filtration over celite<sup>®</sup> the solvent was removed under reduced pressure. The crude product was purified on silica gel via automated flash chromatography twice (cyclohexane:ethyl acetate, 66:33 $\rightarrow$ 55:45 then toluene:ethyl acetate 75:25 $\rightarrow$ 66:33) to yield the product **14** as a colorless oil (15.5 mg, 21.8  $\mu\text{mol}$ , 39%).

$R_F$  (cyclohexane:ethyl acetate, 2:1) = 0.18.

$[\alpha]_{\text{D}}^{20} = -11.5$  ( $c = 0.24$  in  $\text{CHCl}_3$ ).

**IR (ATR):**  $\tilde{\nu} = 2944$  (br, w), 2122 (m), 1747 (s), 1363 (m), 1219 (s), 1094 (m), 1034 (s), 980 (m), 912 (m), 751 (m), 699 (m)  $\text{cm}^{-1}$ .

**$^1\text{H}$  NMR** (500 MHz,  $\text{CDCl}_3$ , 298 K)  $\delta = 7.41 - 7.27$  (m, 5H, Ar-H), 5.22 (t,  $^3J_{2,3} = ^3J_{3,4} = 9.6$  Hz, 1H, H-3<sub>Glc</sub>), 5.10 – 4.98 (m, 3H, H-2<sub>Gal</sub>, H-2<sub>Glc</sub>, H-4<sub>Glc</sub>), 4.94 (dd,  $^3J_{2,3} = 10.2$  Hz,  $^3J_{3,4} = 2.9$  Hz, 1H, H-3<sub>Gal</sub>), 4.59 – 4.48 (m, 4H, H-1<sub>Gal</sub>, H-1<sub>Glc</sub>, PhCH<sub>2</sub>), 4.20 – 4.13 (m, 2H, H-4<sub>Gal</sub>, H-6a<sub>Glc</sub>), 4.04 (dd,  $^2J = 12.4$  Hz,  $^3J_{5,6b} = 2.4$  Hz, 1H, H-6b<sub>Glc</sub>), 3.79 (ddd,  $^3J = 6.2$  Hz,  $^3J = 5.0$  Hz,  $^3J = 1.0$  Hz, 1H, H-5<sub>Gal</sub>), 3.76 – 3.64 (m, 2H, H-6a<sub>Gal</sub>, H-6b<sub>Gal</sub>), 3.60 (ddd,  $^3J_{4,5} = 10.0$  Hz,  $^3J_{5,6a} = 4.6$  Hz,  $^3J_{5,6b} = 2.4$  Hz, 1H, H-5<sub>Glc</sub>), 2.15 (s, 3H, OAc), 2.12 (s, 3H, OAc), 2.06 (s, 3H, OAc), 2.03 (s, 3H, OAc), 2.02 (s, 3H, OAc), 2.02 (s, 3H, OAc) ppm.

**$^{13}\text{C}$  NMR** (126 MHz,  $\text{CDCl}_3$ , 298 K)  $\delta = 170.6$  ( $\underline{\text{C}}(\text{O})\text{CH}_3$ ), 170.5 ( $\underline{\text{C}}(\text{O})\text{CH}_3$ ), 170.2 ( $\underline{\text{C}}(\text{O})\text{CH}_3$ ), 169.6 ( $\underline{\text{C}}(\text{O})\text{CH}_3$ ), 169.5 ( $\underline{\text{C}}(\text{O})\text{CH}_3$ ), 169.4 ( $\underline{\text{C}}(\text{O})\text{CH}_3$ ), 138.0 (OBn<sub>ipso</sub>), 128.6 (2 Ar- $\underline{\text{C}}\text{H}$ ), 127.9 (Ar- $\underline{\text{C}}\text{H}$ ), 127.7 (2 Ar- $\underline{\text{C}}\text{H}$ ), 101.2 (C-1<sub>Glc</sub>), 88.1 (C-1<sub>Gal</sub>), 75.8 (C-5<sub>Gal</sub>), 73.8 (C-4<sub>Gal</sub>), 73.6 (Ph $\underline{\text{C}}\text{H}_2$ ), 73.3 (C-3<sub>Gal</sub>), 72.6 (C-3<sub>Glc</sub>), 72.0 (C-5<sub>Glc</sub>), 71.3 (C-2<sub>Glc</sub>), 69.0 (C-6<sub>Gal</sub>), 68.8 (C-2<sub>Gal</sub>/C-4<sub>Glc</sub>), 68.4 (C-2<sub>Gal</sub>/C-4<sub>Glc</sub>), 61.8 (C-6<sub>Glc</sub>), 20.9 (CH<sub>3</sub>), 20.8 (2 CH<sub>3</sub>), 20.8 (CH<sub>3</sub>), 20.7 (CH<sub>3</sub>), 20.6 (CH<sub>3</sub>) ppm.

**ESI-HRMS:**  $m/z = 727.26623$  [ $\text{M} + \text{NH}_4$ ]<sup>+</sup> (calculated  $m/z = 727.26686$ ).

### 2.13. 2,3,4,6-Tetra-O-acetyl- $\alpha$ -D-mannopyranosyl-(1 $\rightarrow$ 4)-2,3-di-O-acetyl-6-O-benzyl- $\beta$ -D-galactopyranosyl azide (**15**)

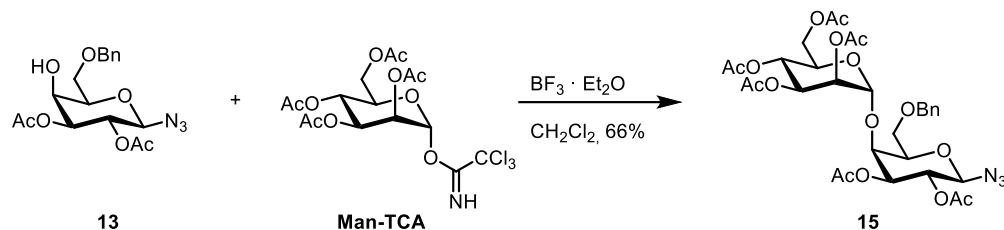

The acceptor galactosyl azide **13** (122 mg, 322  $\mu\text{mol}$ , 1 equiv) was dissolved in dry dichloromethane (2 mL) under a nitrogen atmosphere, freshly activated molecular sieve (3 $\text{\AA}$ , ~50 mg) was added and a solution of mannosyl donor Man-TCA (317 mg, 643  $\mu\text{mol}$ , 2 equiv) in dry dichloromethane (600  $\mu\text{L}$ ) was added. The reaction mixture was stirred at room temperature for 15 min. After cooling to 0  $^{\circ}\text{C}$  boron trifluoride diethyl etherate (20  $\mu\text{L}$ , 161  $\mu\text{mol}$ , 0.5 equiv) was added and the reaction mixture was stirred at 0  $^{\circ}\text{C}$  for 2 h, followed by stirring at room temperature for 16 h. The reaction mixture was diluted with dichloromethane (10 mL) and satd. aq.  $\text{NaHCO}_3$  solution (10 mL) and vigorously stirred for 10 min. It was filtrated over celite and the separated aq. phase was extracted with dichloromethane (3x50 mL). The combined org. phases were washed with brine (20 mL), dried over  $\text{MgSO}_4$ , filtrated and the solvent was removed under reduced pressure. The crude was purified on silica gel via automated flash chromatography (cyclohexane:ethyl acetate, 70:30 $\rightarrow$ 55:45) to yield the product **15** as a colorless oil (150 mg, 211  $\mu\text{mol}$ , 66%).

$R_F$  (cyclohexane:ethyl acetate, 2:1) = 0.19.

$[\alpha]_{\text{D}}^{20} = +16.9$  ( $c = 0.76$  in  $\text{CHCl}_3$ ).

**IR (ATR):**  $\tilde{\nu} = 2925$  (w), 2118 (m), 1742 (s), 1368 (m), 1213 (s), 1132 (m), 1081 (m), 1039 (s), 983 (m), 908 (m), 739 (w), 699 (m), 599 (m)  $\text{cm}^{-1}$ .

**$^1\text{H}$  NMR** (500 MHz,  $\text{CDCl}_3$ , 298 K)  $\delta = 7.36 - 7.27$  (m, 5H, Ar-H), 5.43 – 5.31 (m, 3H, H-2<sub>Man</sub>, H-3<sub>Man</sub>, H-4<sub>Man</sub>), 5.16 (dd,  $^3J_{2,3} = 10.6$  Hz,  $^3J_{1,2} = 8.6$  Hz, 1H, H-2<sub>Gal</sub>), 4.95 (dd,  $^3J_{2,3} = 10.6$  Hz,  $^3J_{3,4} = 3.0$  Hz, 1H, H-3<sub>Gal</sub>), 4.88 (d,  $^3J_{1,2} = 1.8$  Hz, 1H, H-1<sub>Man</sub>), 4.64 – 4.56 (m, 2H, H-1<sub>Gal</sub>, PhCH<sub>2</sub>H'), 4.45 (d,  $^2J = 11.8$  Hz, 1H, PhCH<sub>2</sub>H'), 4.34 (dd,  $^2J = 12.3$  Hz,  $^3J_{5,6a} = 3.9$  Hz, 1H, H-6a<sub>Man</sub>), 4.30 – 4.24 (m, 2H, H-4<sub>Gal</sub>, H-5<sub>Man</sub>), 4.10 (dd,  $^2J = 12.2$  Hz,  $^3J_{5,6b} = 2.3$  Hz, 1H, H-6b<sub>Man</sub>), 3.84 (t,  $^3J_{4,5} = ^3J_{5,6} = 7.2$  Hz, 1H, H-5<sub>Gal</sub>), 3.76 – 3.67 (m, 2H, H-6a<sub>Gal</sub>, H-6b<sub>Gal</sub>), 2.11 (s, 3H, OAc), 2.10 (s, 3H, OAc), 2.09 (s, 6H, 2x OAc), 2.08 (s, 3H, OAc), 2.02 (s, 3H, OAc) ppm.

**$^{13}\text{C}$  NMR** (126 MHz,  $\text{CDCl}_3$ , 298 K)  $\delta = 170.8$  ( $\text{C}(\text{O})\text{CH}_3$ ), 170.3 ( $\text{C}(\text{O})\text{CH}_3$ ), 170.1 ( $\text{C}(\text{O})\text{CH}_3$ ), 170.0 ( $\text{C}(\text{O})\text{CH}_3$ ), 169.9 ( $\text{C}(\text{O})\text{CH}_3$ ), 169.4 ( $\text{C}(\text{O})\text{CH}_3$ ), 137.6 (OBn<sub>ipso</sub>), 128.6 (2 Ar-CH), 128.0 (Ar-CH), 128.0 (2 Ar-CH), 100.0 (C-1<sub>Man</sub>), 88.4 (C-1<sub>Gal</sub>), 76.2 (C-4<sub>Gal</sub>/C-5<sub>Man</sub>), 74.7 (C-5<sub>Gal</sub>), 73.4 (PhCH<sub>2</sub>), 72.3 (C-3<sub>Gal</sub>), 69.5 (C-2<sub>Man</sub>, C-4<sub>Gal</sub>/C-5<sub>Man</sub>), 69.2 (C-3<sub>Man</sub>/C-4<sub>Man</sub>), 68.7 (C-2<sub>Gal</sub>), 66.6 (C-6<sub>Gal</sub>), 65.7 (C-3<sub>Man</sub>/C-4<sub>Man</sub>), 62.2 (C-6<sub>Man</sub>), 21.1 ( $\text{CH}_3$ ), 21.0 ( $\text{CH}_3$ ), 20.9 ( $\text{CH}_3$ ), 20.9 (2  $\text{CH}_3$ ), 20.8 ( $\text{CH}_3$ ) ppm.

**ESI-HRMS:**  $m/z = 732.22144$  [ $\text{M}+\text{Na}$ ] $^+$  (calculated  $m/z = 732.22225$ ).

## 2.14. 2,3,4,6-Tetra-O-acetyl- $\beta$ -D-glucopyranosyl-(1 $\rightarrow$ 4)-2,3-di-O-acetyl- $\beta$ -D-galactopyranosyl azide (**16**)

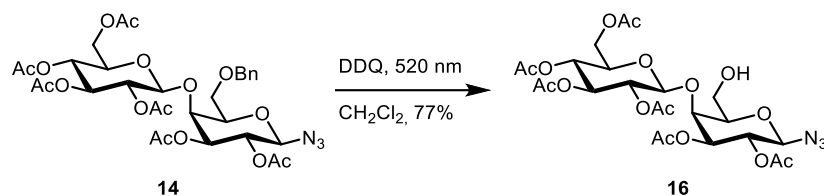

Following the procedure from Cavedon<sup>[4]</sup> et al., the disaccharide **14** (89 mg, 126  $\mu$ mol, 1 equiv) and 2,3-dichloro-5,6-dicyano-1,4-benzoquinone (43 mg, 189  $\mu$ mol, 1.5 equiv) were dissolved in dry dichloromethane (6.45 mL) under nitrogen atmosphere and water (65  $\mu$ L) was added. During strong stirring the reaction mixture was irradiated with 520 nm green light for 4 h at room temperature. The reaction mixture was diluted with dichloromethane (80 mL) and washed with satd. aq.  $\text{NaHCO}_3$  solution (50 mL). The separated aq. phase was extracted with dichloromethane (2 x 50 mL). All organic phases were combined and dried over  $\text{MgSO}_4$ , filtrated and the solvent was removed under reduced pressure. The crude was purified on silica gel via automated flash chromatography (cyclohexane:ethyl acetate, 60:40 $\rightarrow$ 20:80) to yield the product **16** as a colorless solid (60 mg, 96.8  $\mu$ mol, 77%).

$R_F$  (cyclohexane:ethyl acetate, 1:2) = 0.25.

$[\alpha]_D^{20} = -8.6$  ( $c = 0.70$  in  $\text{CHCl}_3$ ).

**IR (ATR):**  $\tilde{\nu} = 3562$  (m), 2961 (w), 2915 (w), 2106 (m), 1747 (s), 1736 (s), 1366 (m), 1216 (s), 1167 (m), 1064 (s), 1029 (s), 953 (m)  $\text{cm}^{-1}$ .

**$^1\text{H}$  NMR** (600 MHz,  $\text{CDCl}_3$ , 298 K)  $\delta = 5.25$  (dd,  $^3J_{2,3} = 9.9$  Hz,  $^3J_{3,4} = 9.3$  Hz, 1H, H-3<sub>Glc</sub>), 5.07 (dd,  $^3J_{2,3} = 9.9$  Hz,  $^3J_{1,2} = 8.1$  Hz, 1H, H-2<sub>Glc</sub>), 5.04 – 4.94 (m, 3H, H-2<sub>Gal</sub>, H-3<sub>Gal</sub>, H-4<sub>Glc</sub>), 4.56 – 4.51 (m, 2H, H-1<sub>Gal</sub>, H-1<sub>Glc</sub>), 4.38 (dd,  $^2J = 12.3$  Hz,  $^3J_{5,6a} = 2.4$  Hz, 1H, H-6a<sub>Glc</sub>), 4.25 (dd,  $^3J_{3,4} = 3.0$  Hz,  $^3J_{4,5} = 0.9$  Hz, 1H, H-4<sub>Gal</sub>), 3.96 (dd,  $^2J = 12.3$  Hz,  $^3J_{5,6b} = 7.0$  Hz, 1H, H-6b<sub>Glc</sub>), 3.82 (ddd,  $^2J = 12.6$  Hz,  $^3J_{5,6a} = 10.7$  Hz,  $^3J_{\text{OH},6a} = 6.7$  Hz, 1H, H-6a<sub>Gal</sub>), 3.75 – 3.66 (m, 3H, H-5<sub>Gal</sub>, H-5<sub>Glc</sub>, H-6b<sub>Gal</sub>), 2.93 (t,  $^3J_{\text{OH},6} = 6.9$  Hz, 1H, OH), 2.16 (s, 3H, OAc), 2.13 (s, 3H, OAc), 2.10 (s, 3H, OAc), 2.06 (s, 3H, OAc), 2.05 (s, 3H, OAc), 2.03 (s, 3H, OAc) ppm.

**$^{13}\text{C}$  NMR** (151 MHz,  $\text{CDCl}_3$ , 298 K)  $\delta = 170.7$  ( $\underline{\text{C}}(\text{O})\text{CH}_3$ ), 170.4 ( $\underline{\text{C}}(\text{O})\text{CH}_3$ ), 170.3 ( $\underline{\text{C}}(\text{O})\text{CH}_3$ ), 169.5 (2  $\underline{\text{C}}(\text{O})\text{CH}_3$ ), 169.3 ( $\underline{\text{C}}(\text{O})\text{CH}_3$ ), 102.0 (C-1<sub>Glc</sub>), 88.2 (C-1<sub>Gal</sub>), 75.6 (C-5<sub>Glc/Gal</sub>), 73.7 (C-4<sub>Gal</sub>), 73.1\*, 72.3 (C-3<sub>Glc</sub>), 72.2 (C-5<sub>Glc/Gal</sub>), 70.9 (C-2<sub>Glc</sub>), 68.8\*, 68.7\*, 62.3 (C-6<sub>Glc</sub>), 59.1 (C-6<sub>Gal</sub>), 20.9 ( $\text{CH}_3$ ), 20.8 ( $\text{CH}_3$ ), 20.7 (2  $\text{CH}_3$ ), 20.7 ( $\text{CH}_3$ ), 20.6 ( $\text{CH}_3$ ) ppm.

\*Assignment is ambiguous due to signal overlap (C-2<sub>Gal</sub>, C-3<sub>Gal</sub>, C-4<sub>Glc</sub>)

**ESI-HRMS:**  $m/z = 637.21922$  [ $\text{M}+\text{NH}_4$ ]<sup>+</sup> (calculated  $m/z = 637.21991$ ).

## 2.15. 2,3,4,6-Tetra-O-acetyl- $\alpha$ -D-mannopyranosyl-(1 $\rightarrow$ 4)-2,3-di-O-acetyl- $\beta$ -D-galactopyranosyl azide (**17**)

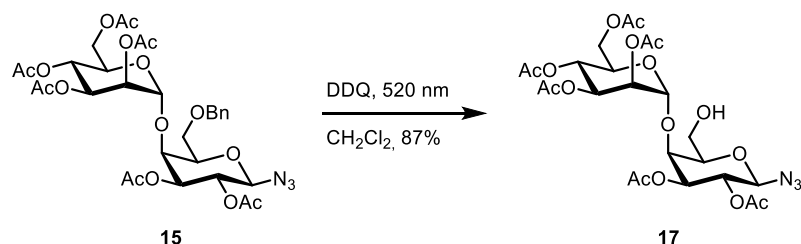

Following the procedure from Cavedon<sup>[4]</sup> et al., the disaccharide **15** (122 mg, 172  $\mu$ mol, 1 equiv) and 2,3-dichloro-5,6-dicyano-1,4-benzoquinone (58.5 mg, 258  $\mu$ mol, 1.5 equiv) were dissolved in dry dichloromethane (8.5 mL) under a nitrogen atmosphere and water (85  $\mu$ L) was added. During strong stirring the reaction mixture was irradiated with 520 nm green light for 6.5 h at room temperature. The reaction mixture was diluted with dichloromethane (50 mL) and washed with satd. aq.  $\text{NaHCO}_3$  solution (50 mL). The aq. phases were extracted with dichloromethane (2 x 50 mL). All organic phases were combined and dried over  $\text{MgSO}_4$ , filtrated and the solvent was removed under reduced pressure. The crude was purified on silica gel via automated flash chromatography (cyclohexane:ethyl acetate, 50:50 $\rightarrow$ 40:60) to yield the product **17** as a colorless solid (92.3 mg, 149  $\mu$ mol, 87%).

$R_F$  (cyclohexane:ethyl acetate, 1:1) = 0.16.

$[\alpha]_D^{20} = +15.8$  ( $c = 0.82$  in  $\text{CHCl}_3$ ).

**IR (ATR):**  $\tilde{\nu} = 2945$  (w), 2121 (m), 1749 (s), 1735 (s), 1368 (m), 1215 (s), 1142 (m), 1107 (m), 1082 (m), 1042 (s), 899 (m)  $\text{cm}^{-1}$ .

**$^1\text{H}$  NMR** (500 MHz,  $\text{CDCl}_3$ , 298 K)  $\delta = 5.39$  (t,  $^3J_{3,4} = ^3J_{4,5} = 10.0$  Hz, 1H, H-4<sub>Man</sub>), 5.33 (dd,  $^3J_{3,4} = 10.1$  Hz,  $^3J_{2,3} = 3.3$  Hz, 1H, H-3<sub>Man</sub>), 5.28 (dd,  $^3J_{2,3} = 3.3$  Hz,  $^3J_{1,2} = 1.9$  Hz, 1H, H-2<sub>Man</sub>), 5.18 (dd,  $^3J_{2,3} = 10.6$  Hz,  $^3J_{1,2} = 8.6$  Hz, 1H, H-2<sub>Gal</sub>), 4.98 (dd,  $^3J_{2,3} = 10.6$  Hz,  $^3J_{3,4} = 3.1$  Hz, 1H, H-3<sub>Gal</sub>), 4.93 (d,  $^3J_{1,2} = 1.9$  Hz, 1H, H-1<sub>Man</sub>), 4.62 (d,  $^3J_{1,2} = 8.7$  Hz, 1H, H-1<sub>Gal</sub>), 4.34 (dd,  $^2J = 12.4$  Hz,  $^3J_{5,6a} = 3.9$  Hz, 1H, H-6a<sub>Man</sub>), 4.29 – 4.21 (m, 2H, H-4<sub>Gal</sub>, H-5<sub>Man</sub>), 4.11 (dd,  $^2J = 12.4$  Hz,  $^3J_{5,6b} = 2.4$  Hz, 1H, H-6b<sub>Man</sub>), 3.97 – 3.89 (m, 1H, H-6a<sub>Gal</sub>), 3.87 – 3.78 (m, 2H, H-5<sub>Gal</sub>, H-6b<sub>Gal</sub>), 2.16 (s, 3H, OAc), 2.10 (s, 3H, OAc), 2.09 (s, 9H, 3xOAc), 2.02 (s, 3H, OAc) ppm.

**$^{13}\text{C}$  NMR** (126 MHz,  $\text{CDCl}_3$ , 298 K)  $\delta = 170.8$  (2 x  $\underline{\text{C}}(\text{O})\text{CH}_3$ ), 170.3 ( $\underline{\text{C}}(\text{O})\text{CH}_3$ ), 170.2 ( $\underline{\text{C}}(\text{O})\text{CH}_3$ ), 169.9 ( $\underline{\text{C}}(\text{O})\text{CH}_3$ ), 169.5 ( $\underline{\text{C}}(\text{O})\text{CH}_3$ ), 99.8 (C-1<sub>Man</sub>), 88.5 (C-1<sub>Gal</sub>), 76.0 (C-5<sub>Gal</sub>), 75.9 (C-4<sub>Gal</sub>), 72.4 (C-3<sub>Gal</sub>), 69.8 (C-2<sub>Man</sub>), 69.6 (C-5<sub>Man</sub>), 69.1 (C-3<sub>Man</sub>), 68.7 (C-2<sub>Gal</sub>), 65.5 (C-4<sub>Man</sub>), 62.1 (C-6<sub>Man</sub>), 60.0 (C-6<sub>Gal</sub>), 21.1 ( $\text{CH}_3$ ), 21.0 ( $\text{CH}_3$ ), 20.9 ( $\text{CH}_3$ ), 20.9 (2  $\text{CH}_3$ ), 20.8 ( $\text{CH}_3$ ) ppm.

**ESI-HRMS:**  $m/z = 642.17428$  [ $\text{M}+\text{Na}$ ] $^+$  (calculated  $m/z = 642.17530$ ).

**2.16. 2,3,4,6-Tetra-O-acetyl- $\beta$ -D-glucopyranosyl-(1 $\rightarrow$ 4)-[2,3,4,6-tetra-O-acetyl- $\alpha$ -D-mannopyranosyl-(1 $\rightarrow$ 6)]-2,3-di-O-acetyl- $\beta$ -D-galactopyranosyl azide (**18**)**

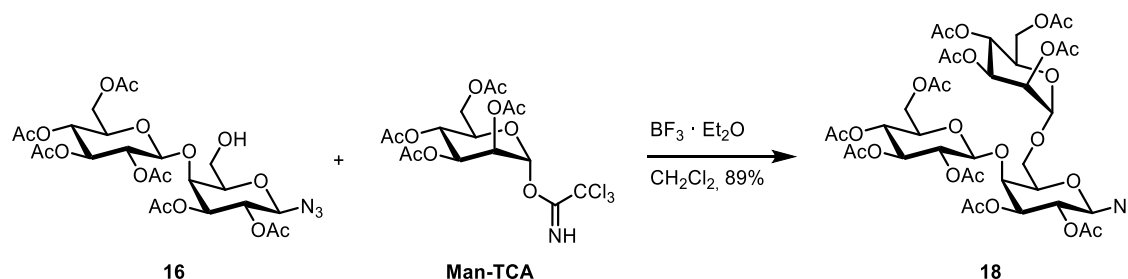

The acceptor disaccharide **16** (25 mg, 40.5  $\mu$ mol, 1 equiv) and the mannosyl donor Man-TCA (27 mg, 55.0  $\mu$ mol, 1.4 equiv) were dissolved in dry dichloromethane (500  $\mu$ L) under nitrogen atmosphere, freshly activated molecular sieve (3 $\text{\AA}$ , ~20 mg) was added and the reaction mixture stirred at room temperature for 20 min. At 0  $^{\circ}\text{C}$  boron trifluoride diethyl etherate (5  $\mu$ L, 39.5  $\mu$ mol, 1 equiv) was added and the reaction mixture was stirred at 0  $^{\circ}\text{C}$  for 2 h, followed by stirring at room temperature for 22 h. Triethylamine (50  $\mu$ L) was added and the reaction mixture was filtered over celite<sup>®</sup>. The solvent was removed under reduced pressure and the crude product was purified on silica gel via automated flash chromatography (cyclohexane:ethyl acetate, 70:30 $\rightarrow$ 30:70) to yield the product **18** as a colorless oil (34 mg, 36.0  $\mu$ mol, 89%).

$R_F$  (cyclohexane:ethyl acetate, 1:2) = 0.41.

$[\alpha]_D^{20} = +10.5$  ( $c = 0.37$  in  $\text{CHCl}_3$ ).

**IR (ATR):**  $\tilde{\nu} = 2941$  (w), 2119 (m), 1745 (s), 1434 (w), 1368 (m), 1215 (s), 1038 (s), 903 (m)  $\text{cm}^{-1}$ .

**$^1\text{H}$  NMR** (600 MHz,  $\text{CDCl}_3$ , 298 K)  $\delta = 5.30$  (dd,  $^3J_{3,4} = 10.0$  Hz,  $^3J_{2,3} = 3.5$  Hz, 1H, H-3<sub>Man</sub>), 5.26 – 5.18 (m, 3H, H-2<sub>Man</sub>, H-3<sub>Glc</sub>, H-4<sub>Man</sub>), 5.05 (dd,  $^3J_{4,5} = 10.1$  Hz,  $^3J_{3,4} = 9.4$  Hz, 1H, H-4<sub>Glc</sub>), 5.02 – 4.94 (m, 3H, H-2<sub>Gal</sub>, H-2<sub>Glc</sub>, H-3<sub>Gal</sub>), 4.82 (d,  $^3J_{1,2} = 1.7$  Hz, 1H, H-1<sub>Man</sub>), 4.62 (d,  $^3J_{1,2} = 8.5$  Hz, 1H, H-1<sub>Gal</sub>), 4.53 (d,  $^3J_{1,2} = 8.0$  Hz, 1H, H-1<sub>Glc</sub>), 4.26 (dd,  $^2J = 12.2$  Hz,  $^3J_{5,6a} = 5.7$  Hz, 1H, H-6a<sub>Man</sub>), 4.19 (dd,  $^2J = 12.2$  Hz,  $^3J_{5,6b} = 2.4$  Hz, 1H, H-6b<sub>Man</sub>), 4.15 – 4.10 (m, 3H, H-4<sub>Gal</sub>, H-6a<sub>Glc</sub>, H-6b<sub>Glc</sub>), 4.09 – 4.05 (m, 1H, H-5<sub>Man</sub>), 3.88 (dd,  $^2J = 10.3$  Hz,  $^3J_{5,6a} = 6.7$  Hz, 1H, H-6a<sub>Gal</sub>), 3.82 (ddd,  $^3J_{5,6a} = 6.9$  Hz,  $^3J_{5,6b} = 4.0$  Hz,  $^3J_{4,5} = 1.1$  Hz, 1H, H-5<sub>Gal</sub>), 3.69 (dd,  $^2J = 10.4$  Hz,  $^3J_{5,6b} = 4.0$  Hz, 1H, H-6b<sub>Gal</sub>), 3.61 (dt,  $^3J_{4,5} = 10.0$  Hz,  $^3J_{5,6a} = ^3J_{5,6b} = 3.4$  Hz, 1H, H-5<sub>Glc</sub>), 2.15 (s, 3H, OAc), 2.14 (s, 3H, OAc), 2.14 (s, 3H, OAc), 2.12 (s, 3H, OAc), 2.08 (s, 3H, OAc), 2.07 (s, 3H, OAc), 2.02 (s, 3H, OAc), 2.02 (s, 3H, OAc), 1.99 (s, 3H, OAc) ppm.

**$^{13}\text{C}$  NMR** (151 MHz,  $\text{CDCl}_3$ , 298 K)  $\delta = 170.9$  ( $\underline{\text{C}}(\text{O})\text{CH}_3$ ), 170.6 ( $\underline{\text{C}}(\text{O})\text{CH}_3$ ), 170.5 ( $\underline{\text{C}}(\text{O})\text{CH}_3$ ), 170.3 ( $\underline{\text{C}}(\text{O})\text{CH}_3$ ), 170.2 ( $\underline{\text{C}}(\text{O})\text{CH}_3$ ), 170.1 ( $\underline{\text{C}}(\text{O})\text{CH}_3$ ), 170.0 ( $\underline{\text{C}}(\text{O})\text{CH}_3$ ), 169.5 ( $\underline{\text{C}}(\text{O})\text{CH}_3$ ), 169.5 ( $\underline{\text{C}}(\text{O})\text{CH}_3$ ), 169.4 ( $\underline{\text{C}}(\text{O})\text{CH}_3$ ), 101.2 (C-1<sub>Glc</sub>), 97.1 (C-1<sub>Man</sub>), 88.0 (C-1<sub>Gal</sub>), 75.1 (C-5<sub>Gal</sub>), 73.8 (C-4<sub>Gal</sub>), 73.1\*, 72.5 (C-3<sub>Glc</sub>), 72.0 (C-5<sub>Glc</sub>), 71.2\*, 69.4 (C-3<sub>Man</sub>/C-4<sub>Man</sub>), 69.3 (C-3<sub>Man</sub>/C-4<sub>Man</sub>), 68.8 (C-5<sub>Man</sub>), 68.6\*, 68.3 (C-4<sub>Glc</sub>), 66.8 (C-6<sub>Gal</sub>), 66.1 (C-2<sub>Man</sub>), 62.5 (C-6<sub>Man</sub>), 61.3 (C-6<sub>Glc</sub>), 21.0 ( $\text{CH}_3$ ), 20.9 ( $\text{CH}_3$ ), 20.9 ( $\text{CH}_3$ ), 20.9 ( $\text{CH}_3$ ), 20.8 (2  $\text{CH}_3$ ), 20.8 (2  $\text{CH}_3$ ), 20.7 ( $\text{CH}_3$ ), 20.6 ( $\text{CH}_3$ ) ppm.

\*Assignment is ambiguous due to signal overlap (C-2<sub>Gal</sub>, C-2<sub>Glc</sub>, C-3<sub>Gal</sub>)

**ESI-HRMS:**  $m/z = 967.31341$  [ $\text{M}+\text{NH}_4$ ]<sup>+</sup> (calculated  $m/z = 967.31499$ ).

**2.17. 2,3,4,6-Tetra-O-acetyl- $\alpha$ -D-mannopyranosyl-(1 $\rightarrow$ 4)-[2,3,4,6-tetra-O-acetyl- $\beta$ -D-glucopyranosyl-(1 $\rightarrow$ 6)]-2,3-di-O-acetyl- $\beta$ -D-galactopyranosyl azide (**19**)**

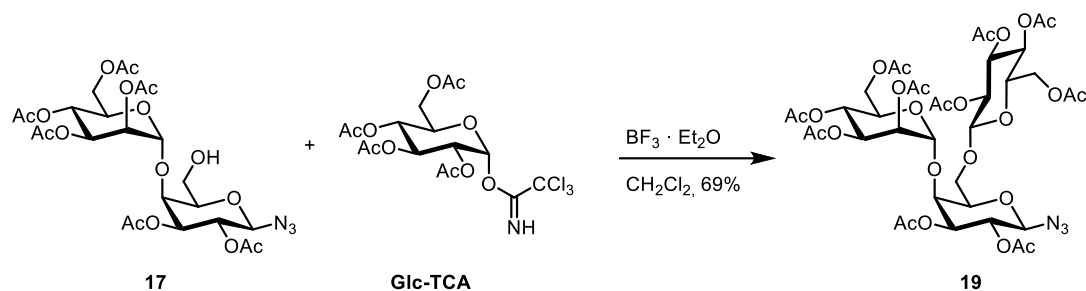

The acceptor disaccharide **17** (63.5 mg, 102  $\mu$ mol, 1 equiv) and the glucosyl donor Glc-TCA (60.6 mg, 123  $\mu$ mol, 1.2 equiv) were dissolved in dry dichloromethane (5 mL) under nitrogen atmosphere, freshly activated molecular sieve (3 $\text{\AA}$ , ~100 mg) was added and the reaction mixture stirred at room temperature for 30 min. At 0  $^{\circ}\text{C}$  boron trifluoride diethyl etherate (6.5  $\mu$ L, 51.2  $\mu$ mol, 0.5 equiv) was added and the reaction mixture was stirred at 0  $^{\circ}\text{C}$  for 1 h, followed by stirring at room temperature for 15 h. Triethylamine (25  $\mu$ L) was added and the reaction mixture was filtered over celite. The solvent was removed under reduced pressure and the crude product was purified on silica gel via automated flash chromatography (cyclohexane:ethyl acetate, 65:35 $\rightarrow$ 40:60 over 12 CV) to yield the product **19** as a colorless solid (67.5 mg, 71.1  $\mu$ mol, 69%).

$R_F$  (cyclohexane:ethyl acetate, 1:1) = 0.17.

$[\alpha]_D^{20} = +14.3$  ( $c = 0.28$  in  $\text{CHCl}_3$ ).

**IR (ATR):**  $\tilde{\nu} = 2925$  (w), 2120 (m), 1743 (s), 1434 (m), 1368 (m), 1214 (s), 1036 (s), 906 (m)  $\text{cm}^{-1}$ .

**$^1\text{H}$  NMR** (500 MHz,  $\text{CDCl}_3$ , 298 K)  $\delta = 5.39$  (t,  $^3J_{3,4} = ^3J_{4,5} = 10.0$  Hz, 1H, H-4<sub>Man</sub>), 5.30 (dd,  $^3J_{3,4} = 10.1$  Hz,  $^3J_{2,3} = 3.2$  Hz, 1H, H-3<sub>Man</sub>), 5.26 (dd,  $^3J_{2,3} = 3.3$  Hz,  $^3J_{1,2} = 2.0$  Hz, 1H, H-2<sub>Man</sub>), 5.21 (t,  $^3J_{2,3} = ^3J_{3,4} = 9.5$  Hz, 1H, H-3<sub>Glc</sub>), 5.17 – 5.07 (m, 2H, H-2<sub>Gal</sub>, H-4<sub>Glc</sub>), 4.99 (dd,  $^3J_{2,3} = 9.7$  Hz,  $^3J_{1,2} = 8.0$  Hz, 1H, H-2<sub>Glc</sub>), 4.89 (dd,  $^3J_{2,3} = 10.6$  Hz,  $^3J_{3,4} = 3.0$  Hz, 1H, H-3<sub>Gal</sub>), 4.79 (d,  $^3J_{1,2} = 2.0$  Hz, 1H, H-1<sub>Man</sub>), 4.65 – 4.60 (m, 2H, H-1<sub>Gal</sub>, H-1<sub>Glc</sub>), 4.30 (dd,  $^2J = 12.4$  Hz,  $^3J_{5,6a} = 3.8$  Hz, 1H, H-6a<sub>Man</sub>), 4.25 (dd,  $^2J = 12.3$  Hz,  $^3J_{5,6a} = 4.5$  Hz, 1H, H-6a<sub>Glc</sub>), 4.21 (dt,  $^3J_{4,5} = 10.0$  Hz,  $^3J_{5,6a} = ^3J_{5,6b} = 3.1$  Hz, 1H, H-5<sub>Man</sub>), 4.18 – 4.14 (m, 1H, H-6b<sub>Glc</sub>), 4.16 – 4.08 (m, 2H, H-4<sub>Gal</sub>, H-6b<sub>Man</sub>), 4.06 – 3.97 (m, 1H, H-6a<sub>Gal</sub>), 3.89 – 3.81 (m, 2H, H-5<sub>Gal</sub>, H-6b<sub>Gal</sub>), 3.74 (ddd,  $^3J_{4,5} = 10.1$  Hz,  $^3J_{5,6a} = 4.5$  Hz,  $^3J_{5,6b} = 2.4$  Hz, 1H, H-5<sub>Glc</sub>), 2.15 (s, 3H, OAc), 2.10 (s, 3H, OAc), 2.09 (s, 3H, OAc), 2.09 (s, 3H, OAc), 2.08 (s, 6H, 2 OAc), 2.05 (s, 3H, OAc), 2.02 (s, 3H, OAc), 2.00 (s, 3H, OAc), 2.00 (s, 3H, OAc) ppm.

**$^{13}\text{C}$  NMR** (126 MHz,  $\text{CDCl}_3$ , 298 K)  $\delta = 170.9$  ( $\underline{\text{C}}(\text{O})\text{CH}_3$ ), 170.8 ( $\underline{\text{C}}(\text{O})\text{CH}_3$ ), 170.43 ( $\underline{\text{C}}(\text{O})\text{CH}_3$ ), 170.41 ( $\underline{\text{C}}(\text{O})\text{CH}_3$ ), 170.1 ( $\underline{\text{C}}(\text{O})\text{CH}_3$ ), 170.0 ( $\underline{\text{C}}(\text{O})\text{CH}_3$ ), 169.9 ( $\underline{\text{C}}(\text{O})\text{CH}_3$ ), 169.6 (2  $\underline{\text{C}}(\text{O})\text{CH}_3$ ), 169.4 ( $\underline{\text{C}}(\text{O})\text{CH}_3$ ), 100.9 (C-1<sub>Glc</sub>), 100.1 (C-1<sub>Man</sub>), 88.3 (C-1<sub>Gal</sub>), 76.8 (C-4<sub>Gal</sub>), 75.2 (C-5<sub>Gal</sub>), 72.9 (C-3<sub>Glc</sub>), 72.3 (C-3<sub>Gal</sub>), 72.1 (C-5<sub>Glc</sub>), 71.2 (C-2<sub>Glc</sub>), 69.8 (C-5<sub>Man</sub>), 69.5 (C-2<sub>Man</sub>), 69.2 (C-3<sub>Man</sub>), 68.5 (C-2<sub>Gal</sub>/C-4<sub>Glc</sub>), 68.4 (C-2<sub>Gal</sub>/C-4<sub>Glc</sub>), 67.5 (C-6<sub>Gal</sub>), 65.5 (C-4<sub>Man</sub>), 62.1 (C-6<sub>Glc/Man</sub>), 61.9 (C-6<sub>Glc/Man</sub>), 21.05 ( $\text{CH}_3$ ), 20.92 ( $\text{CH}_3$ ), 20.88 ( $\text{CH}_3$ ), 20.86 ( $\text{CH}_3$ ), 20.81 ( $\text{CH}_3$ ), 20.79 (3  $\text{CH}_3$ ), 20.76 (2  $\text{CH}_3$ ) ppm.

**ESI-HRMS:**  $m/z = 967.31341$  [ $\text{M} + \text{NH}_4$ ] $^+$  (calculated  $m/z = 967.31499$ ).



**2.18.  $\beta$ -D-Glucopyranosyl-(1 $\rightarrow$ 4)-[ $\alpha$ -D-mannopyranosyl-(1 $\rightarrow$ 6)]- $\beta$ -D-galactopyranosyl azide (**20**)**

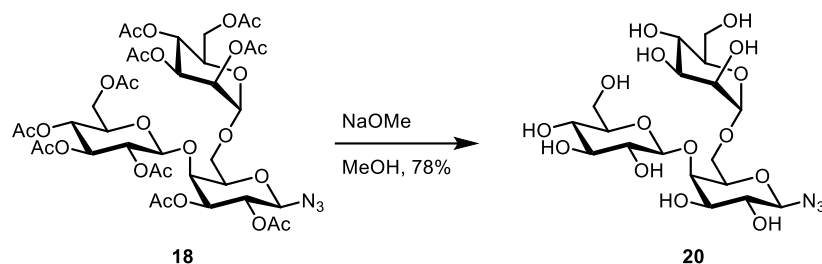

The protected trisaccharide **18** (29 mg, 30.7  $\mu$ mol, 1 equiv) was suspended in methanol (3 mL) and a solution of sodium methoxide in methanol (15  $\mu$ L, 75.0  $\mu$ mol, 5 M, 2.4 equiv) was added at room temperature. The reaction mixture was stirred at room temperature for 19 h. It was neutralized by addition of Amberlite®-IRC 120 H<sup>+</sup> resin and stirring for 20 min. The resin was filtered off and the filtrate was concentrated under reduced pressure. The crude was purified on reversed phase silica gel via automated flash chromatography (H<sub>2</sub>O:MeCN, 100:0 1 CV, 100:0  $\rightarrow$  0:100 over 16 CV) and lyophilized to obtain the product **20** as a lyophilizate (13 mg, 24.0  $\mu$ mol, 78%).

$[\alpha]_D^{20} = +47.3$  ( $c = 0.41$  in CH<sub>3</sub>OH).

**IR (ATR):**  $\tilde{\nu} = 3309$  (br, m), 2894 (w), 2117 (m), 1638 (w), 1412 (w), 1364 (m), 1248 (m), 1162 (m), 1132 (m), 1017 (s), 888 (m), 811 (m) cm<sup>-1</sup>.

**<sup>1</sup>H NMR** (600 MHz, D<sub>2</sub>O, 298 K)  $\delta = 4.92$  (d,  $^3J_{1,2} = 1.7$  Hz, 1H, H-1<sub>Man</sub>), 4.74 (d,  $^3J_{1,2} = 8.7$  Hz, 1H, H-1<sub>Gal</sub>), 4.67 (d,  $^3J_{1,2} = 7.9$  Hz, 1H, H-1<sub>Glc</sub>), 4.24 (d,  $^3J_{3,4} = 3.2$  Hz, 1H, H-4<sub>Gal</sub>), 4.00 (dd,  $^3J_{5,6a} = 7.5$  Hz,  $^3J_{5,6b} = 4.6$  Hz, 1H, H-5<sub>Gal</sub>), 3.96 (dd,  $^3J_{2,3} = 3.6$  Hz,  $^3J_{1,2} = 1.7$  Hz, 1H, H-2<sub>Man</sub>), 3.96 – 3.88 (m, 3H, H-6a<sub>Gal</sub>, H-6a<sub>Glc</sub>, H-6a<sub>Man</sub>), 3.85 – 3.74 (m, 5H, H-3<sub>Gal</sub>, H-3<sub>Man</sub>, H-6b<sub>Gal</sub>, H-6b<sub>Glc</sub>, H-6b<sub>Man</sub>), 3.70 – 3.64 (m, 2H, H-4<sub>Man</sub>, H-5<sub>Man</sub>), 3.58 (dd,  $^3J_{2,3} = 9.8$  Hz,  $^3J_{1,2} = 8.9$  Hz, 1H, H-2<sub>Gal</sub>), 3.53 – 3.47 (m, 1H, H-3<sub>Glc</sub>), 3.46 – 3.39 (m, 2H, H-4<sub>Glc</sub>, H-5<sub>Glc</sub>), 3.37 – 3.31 (m, 1H, H-2<sub>Glc</sub>) ppm.

**<sup>13</sup>C NMR** (151 MHz, D<sub>2</sub>O, 298 K)  $\delta = 103.7$  (C-1<sub>Glc</sub>), 99.7 (C-1<sub>Man</sub>), 90.5 (C-1<sub>Gal</sub>), 77.6 (C-4<sub>Gal</sub>), 75.9 (C-4<sub>Glc</sub>/C-5<sub>Glc</sub>), 75.7 (C-3<sub>Glc</sub>), 74.5 (C-5<sub>Gal</sub>), 73.8 (C-2<sub>Glc</sub>), 73.0 (C-3<sub>Gal/Man</sub>), 72.8 (C-4<sub>Man</sub>/C-5<sub>Man</sub>), 70.7 (C-2<sub>Gal</sub>), 70.5 (C-3<sub>Gal/Man</sub>), 70.0 (C-2<sub>Man</sub>), 69.3 (C-4<sub>Glc</sub>/C-5<sub>Glc</sub>), 66.6 (C-4<sub>Man</sub>/C-5<sub>Man</sub>), 66.3 (C-6<sub>Gal</sub>), 60.8 (C-6<sub>Glc/Man</sub>), 60.5 (C-6<sub>Glc/Man</sub>) ppm.

**ESI-HRMS:**  $m/z = 547.20933$  [M+NH<sub>4</sub>]<sup>+</sup> (calculated  $m/z = 547.20934$ ).

**2.19.  $\alpha$ -D-Mannopyranosyl-(1 $\rightarrow$ 4)-[ $\beta$ -D-glucopyranosyl-(1 $\rightarrow$ 6)]- $\beta$ -D-galactopyranosyl azide (21)**

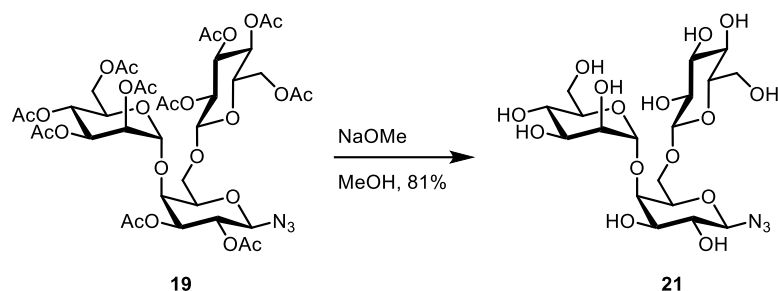

The protected trisaccharide **19** (58 mg, 60.9  $\mu$ mol, 1 equiv) was suspended in methanol (6 mL) and a solution of sodium methoxide in methanol (30  $\mu$ L, 150  $\mu$ mol, 5 M, 2.5 equiv) was added at room temperature. The reaction mixture was stirred at room temperature for 19 h. It was neutralized by addition of Amberlite®-IRC 120 H<sup>+</sup> resin and stirring for 20 min. The resin was filtered off and the filtrate was concentrated under reduced pressure. The crude was purified on reversed phase silica gel via automated flash chromatography (H<sub>2</sub>O:MeCN, 100:0 1 CV, 100:0  $\rightarrow$  0:100 over 16 CV) and lyophilized to obtain the product **21** as a lyophilizate (26.2 mg, 49.5  $\mu$ mol, 81%).

$[\alpha]_{\text{D}}^{20} = -5.7$  ( $c = 0.46$  in CH<sub>3</sub>OH).

**IR (ATR):**  $\tilde{\nu} = 3326$  (br, m), 2925 (w), 2118 (m), 1639 (w), 1364 (m), 1249 (m), 1016 (s), 899 (m), 809 (m) cm<sup>-1</sup>.

**<sup>1</sup>H NMR** (600 MHz, D<sub>2</sub>O, 298 K)  $\delta = 4.92$  (d,  $^3J_{1,2} = 1.7$  Hz, 1H, H-1<sub>Man</sub>), 4.80 – 4.78 (m, 1H, H-1<sub>Gal</sub>), 4.52 (d,  $^3J_{1,2} = 8.0$  Hz, 1H, H-1<sub>Glc</sub>), 4.12 (d,  $^3J_{3,4} = 3.2$  Hz, 1H, H-4<sub>Gal</sub>), 4.10 – 4.01\* (m, 4H, H-2<sub>Man</sub>, H-5<sub>Gal</sub>, H-6a<sub>Gal</sub>), 3.94 (dd,  $^2J = 12.3$  Hz,  $^3J_{5,6a} = 1.8$  Hz, 1H, H-6a<sub>Glc</sub>), 3.89 – 3.69\* (m, 7H, H-3<sub>Gal</sub>, H-6b<sub>Gal</sub>, H-6a<sub>Man</sub>, H-6b<sub>Man</sub>, H-6b<sub>Glc</sub>), 3.53 – 3.43 (m, 3H, H-2<sub>Gal</sub>, H-3<sub>Glc</sub>, H-5<sub>Glc</sub>), 3.44 – 3.37 (m, 1H, H-4<sub>Glc</sub>), 3.33 – 3.29 (m, 1H, H-2<sub>Glc</sub>) ppm.

\*Assignment is ambiguous due to signal overlap (H-3<sub>Man</sub>, H-4<sub>Man</sub>, H-5<sub>Man</sub>).

**<sup>13</sup>C NMR** (151 MHz, D<sub>2</sub>O, 298 K)  $\delta = 102.5$  (C-1<sub>Glc</sub>), 101.6 (C-1<sub>Man</sub>), 90.9 (C-1<sub>Gal</sub>), 77.2 (C-4<sub>Gal</sub>), 75.9\*\*, 75.6\*\*, 75.2\*\*, 73.0\*\*, 73.0 (C-2<sub>Glc</sub>), 72.0\*\*, 70.4\*\*, 70.3\*\*, 70.1\*\*, 69.5 (C-4<sub>Glc</sub>), 67.6 (C-6<sub>Gal</sub>), 66.4\*\*, 60.6 (C-6<sub>Glc/Man</sub>), 60.5 (C-6<sub>Glc/Man</sub>) ppm.

\*\*Assignment is ambiguous due to signal overlap (C-2<sub>Gal</sub>, C-2<sub>Man</sub>, C-3<sub>Gal</sub>, C-3<sub>Man</sub>, C-3<sub>Glc</sub>, C-4<sub>Man</sub>, C-5<sub>Gal</sub>, C-5<sub>Man</sub>, C-5<sub>Glc</sub>)

**ESI-HRMS:**  $m/z = 547.20913$  [M+NH<sub>4</sub>]<sup>+</sup> (calculated  $m/z = 547.20934$ ).

## 2.20. 2,3-Di-O-acetyl- $\beta$ -D-glucopyranosyl azide (**22**)<sup>[6]</sup>

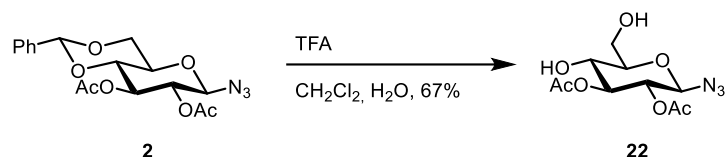

The benzylidene-protected glucosyl azide **2**<sup>[3]</sup> (141 mg, 374  $\mu\text{mol}$ , 1 equiv) was dissolved in a pre-chilled mixture of dichloromethane/water/trifluoroacetic acid (10:0.5:1 v/v, 1.15 mL) at 0°C and stirred at 0°C for 3 h, then stirred at room temperature for 1 h. Pyridine (300  $\mu\text{L}$ , 3.72 mmol, 10 equiv) was added and the solvent was removed under reduced pressure. The crude was purified on silica gel via automated flash chromatography (cyclohexane:ethyl acetate, 4:6) to yield the product **22** as a colorless foam (76 mg, 249  $\mu\text{mol}$ , 67%).

$R_F$  (cyclohexane:ethyl acetate, 4:6) = 0.39.

**<sup>1</sup>H NMR** (500 MHz,  $\text{CDCl}_3$ , 298 K)  $\delta$  = 5.05 (t,  $^3J_{2,3} = ^3J_{3,4} = 9.5$  Hz, 1H, H-3), 4.88 (dd,  $^3J_{2,3} = 9.6$  Hz,  $^3J_{1,2} = 8.8$  Hz, 1H, H-2), 4.67 (d,  $^3J_{1,2} = 8.8$  Hz, 1H, H-1), 3.98 (dd,  $^2J = 12.2$  Hz,  $^3J_{5,6a} = 3.3$  Hz, 1H, H-6a), 3.88 (dd,  $^2J = 12.1$  Hz,  $^3J_{5,6b} = 4.5$  Hz, 1H, H-6b), 3.80 (t,  $^3J_{3,4} = ^3J_{4,5} = 9.5$  Hz, 1H, H-4), 3.54 (ddd,  $^3J_{4,5} = 9.7$  Hz,  $^3J_{5,6b} = 4.5$  Hz,  $^3J_{5,6a} = 3.3$  Hz, 1H, H-5), 2.11 (s, 3H, OAc), 2.09 (s, 3H, OAc) ppm.

**<sup>13</sup>C NMR** (126 MHz,  $\text{CDCl}_3$ , 298 K)  $\delta$  = 171.7 ( $\underline{\text{C}}(\text{O})\text{CH}_3$ ), 169.6 ( $\underline{\text{C}}(\text{O})\text{CH}_3$ ), 88.1 (C-1), 78.0 (C-5), 75.9 (C-3), 70.8 (C-2), 69.2 (C-4), 62.0 (C-6), 21.0 ( $\text{CH}_3$ ), 20.8 ( $\text{CH}_3$ ) ppm.

## 2.21. 2,3-Di-O-acetyl- $\beta$ -D-galactopyranosyl azide (**23**)

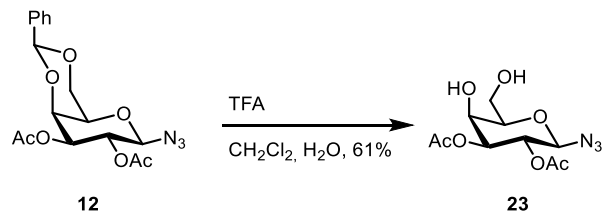

The benzylidene-protected galactosyl azide **12**<sup>[5]</sup> (515 mg, 1.36 mmol, 1 equiv) was dissolved in a pre-chilled mixture of dichloromethane/water/trifluoroacetic acid (10:0.5:1 v/v, 3.75 mL) at 0°C and stirred at 0°C for 3 h, then stirred at room temperature for 1 h. Pyridine (300  $\mu\text{L}$ , 3.72 mmol, 2.7 equiv) was added and the solvent was removed under reduced pressure. The crude was purified on silica gel via automated flash chromatography (cyclohexane:ethyl acetate, 4:6) to yield the product **23** as a viscous oil (239 mg, 826  $\mu\text{mol}$ , 61%).

$R_F$  (cyclohexane:ethyl acetate, 4:6) = 0.30.

$[\alpha]_D^{20} = -8.9$  ( $c = 0.66$  in  $\text{CH}_2\text{Cl}_2$ ).

**IR (ATR):**  $\tilde{\nu}$  = 3448 (m), 3298 (m), 2947 (w), 2106 (s), 1741 (s), 1714 (s), 1371 (m), 1256 (s), 1235 (s), 1217 (s), 1052 (s), 1027 (s), 950 (s)  $\text{cm}^{-1}$ .

**<sup>1</sup>H NMR** (500 MHz,  $\text{CDCl}_3$ , 298 K)  $\delta$  = 5.28 (dd,  $^3J_{2,3} = 10.2$  Hz,  $^3J_{1,2} = 8.8$  Hz, 1H, H-2), 4.98 (dd,  $^3J_{2,3} = 10.1$  Hz,  $^3J_{3,4} = 3.1$  Hz, 1H, H-3), 4.61 (d,  $^3J_{1,2} = 8.7$  Hz, 1H, H-1), 4.24 – 4.19 (m, 1H, H-4),

4.01 (dd,  $^2J = 12.0$  Hz,  $^3J_{5,6a} = 5.4$  Hz, 1H, H-6a), 3.97 – 3.90 (m, 1H, H-6b), 3.71 (ddd,  $^3J_{5,6a} = 5.4$  Hz,  $^3J_{5,6b} = 4.3$  Hz,  $^3J_{4,5} = 1.1$ , 1H, H-5), 2.11 (s, 3H, OAc), 2.09 (s, 3H, OAc) ppm.

**$^{13}\text{C}$  NMR** (126 MHz,  $\text{CDCl}_3$ , 298 K)  $\delta = 170.2$  ( $\underline{\text{C}}(\text{O})\text{CH}_3$ ), 169.7 ( $\underline{\text{C}}(\text{O})\text{CH}_3$ ), 88.6 (C-1), 76.1 (C-5), 73.2 (C-3), 68.6 (C-2/C-4), 68.6 (C-2/C-4), 62.9 (C-6), 21.0 ( $\text{CH}_3$ ), 20.8 ( $\text{CH}_3$ ) ppm.

**ESI-HRMS:**  $m/z = 307.12461$  [ $\text{M} + \text{NH}_4$ ] $^+$  (calculated  $m/z = 307.12483$ ).

**2.22. 2,3,4,6-Tetra-O-acetyl- $\alpha$ -D-mannopyranosyl-(1 $\rightarrow$ 4)-[2,3,4,6-tetra-O-acetyl- $\alpha$ -D-mannopyranosyl-(1 $\rightarrow$ 6)]-2,3-di-O-acetyl- $\beta$ -D-glucopyranosyl azide (**24**)**

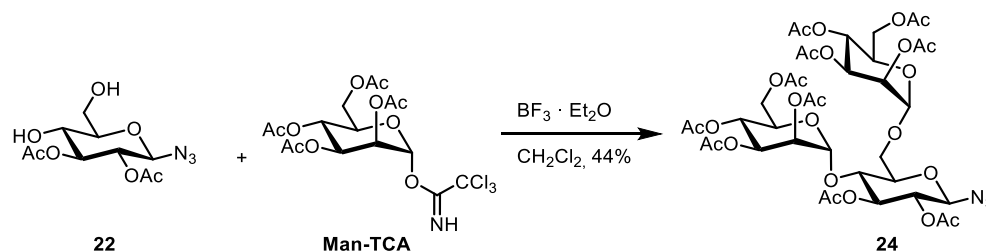

The acceptor glucosyl azide **22**<sup>[6]</sup> (72 mg, 249  $\mu\text{mol}$ , 1 equiv) and the mannosyl donor Man-TCA (338 mg, 686  $\mu\text{mol}$ , 2.8 equiv) were dissolved in dry dichloromethane (12 mL) under nitrogen atmosphere, freshly activated molecular sieve (3Å, ~330 mg) was added and the reaction mixture stirred at room temperature for 15 min. At 0 °C boron trifluoride diethyl etherate (30  $\mu\text{L}$ , 237  $\mu\text{mol}$ , 0.95 equiv) was added and the reaction mixture was stirred at 0 °C for 2 h, followed by stirring at room temperature for 16 h. The reaction mixture was diluted with dichloromethane (150 mL) and satd. aq.  $\text{NaHCO}_3$  solution (5 mL) and strongly stirred for 10 min. After filtration over celite® the phases were separated and the organic phase was washed with satd. aq.  $\text{NaHCO}_3$  solution (20 mL), water (2 x 25 mL) and brine (20 mL). It was dried over  $\text{MgSO}_4$ , filtrated and the solvent was removed under reduced pressure. The crude product was purified on silica gel via automated flash chromatography twice (first cyclohexane:ethyl acetate, 6:4 $\rightarrow$ 1:1, then toluene:ethyl acetate 1:1) to yield the product **24** as a colorless foam (105 mg, 111  $\mu\text{mol}$ , 44%).

$R_F$  (cyclohexane:ethyl acetate, 1:1) = 0.30.

$[\alpha]_D^{20} = +10.0$  ( $c = 0.47$  in  $\text{CH}_2\text{Cl}_2$ ).

**IR (ATR):**  $\tilde{\nu} = 2921$  (m), 2851 (w), 2119 (m), 1743 (s), 1434 (w), 1369 (m), 1218 (s), 1138 (m), 1081 (m), 1040 (s), 981 (m)  $\text{cm}^{-1}$ .

**$^1\text{H}$  NMR** (500 MHz,  $\text{CDCl}_3$ , 298 K)  $\delta = 5.36 - 5.19$  (m, 6H, H-2 $_{\text{Man'}}$ , H-3 $_{\text{Glc}}$ , H-3 $_{\text{Man}}$ , H-3 $_{\text{Man'}}$ , H-4 $_{\text{Man}}$ , H-4 $_{\text{Man'}}$ ), 5.08 – 5.03 (m, 1H, H-2 $_{\text{Man}}$ ), 4.99 (d,  $^3J_{1,2} = 2.2$  Hz, 1H, H-1 $_{\text{Man}}$ ), 4.97 (d,  $^3J_{1,2} = 1.6$  Hz, 1H, H-1 $_{\text{Man'}}$ ), 4.80 (dd,  $^3J_{2,3} = 9.5$  Hz,  $^3J_{1,2} = 8.9$  Hz, 1H, H-2 $_{\text{Glc}}$ ), 4.71 (d,  $^3J_{1,2} = 8.8$  Hz, 1H, H-1 $_{\text{Glc}}$ ), 4.35 – 4.24 (m, 2H, H-6a $_{\text{Man}}$ , H-6a $_{\text{Man'}}$ ), 4.17 – 4.06 (m, 3H, H-5 $_{\text{Man/Man'}}$ , H-6b $_{\text{Man}}$ , H-6b $_{\text{Man'}}$ ), 4.02 (ddd,  $^3J_{4,5} = 8.9$  Hz,  $^3J_{5,6a} = 5.6$  Hz,  $^3J_{5,6b} = 2.9$  Hz, 1H, H-5 $_{\text{Man/Man'}}$ ), 3.98 – 3.89 (m, 2H, H-6a $_{\text{Glc}}$ , H-6b $_{\text{Glc}}$ ), 3.80 – 3.70 (m, 2H, H-4 $_{\text{Glc}}$ , H-5 $_{\text{Glc}}$ ), 2.16 (s, 3H, OAc), 2.14 (s, 3H, OAc), 2.11 (s, 3H, OAc), 2.09 (s, 6H, 2 OAc), 2.07 (s, 3H, OAc), 2.06 (s, 3H, OAc), 2.03 (s, 3H, OAc), 2.00 (s, 3H, OAc), 1.99 (s, 3H, OAc) ppm.

**$^{13}\text{C}$  NMR** (126 MHz,  $\text{CDCl}_3$ , 298 K)  $\delta = 170.7$  ( $\underline{\text{C}}(\text{O})\text{CH}_3$ ), 170.6 ( $\underline{\text{C}}(\text{O})\text{CH}_3$ ), 170.3 ( $\underline{\text{C}}(\text{O})\text{CH}_3$ ), 170.1 ( $\underline{\text{C}}(\text{O})\text{CH}_3$ ), 170.0 ( $\underline{\text{C}}(\text{O})\text{CH}_3$ ), 169.9 ( $\underline{\text{C}}(\text{O})\text{CH}_3$ ), 169.9 ( $\underline{\text{C}}(\text{O})\text{CH}_3$ ), 169.9 ( $\underline{\text{C}}(\text{O})\text{CH}_3$ ), 169.7

(C(O)CH<sub>3</sub>), 169.6 (C(O)CH<sub>3</sub>), 99.5 (C-1<sub>Man</sub>), 97.8 (C-1<sub>Man'</sub>), 87.6 (C-1<sub>Glc</sub>), 76.8 (C-4<sub>Glc</sub>/C-5<sub>Glc</sub>), 76.3 (C-4<sub>Glc</sub>/C-5<sub>Glc</sub>), 74.1\*, 71.3 (C-2<sub>Glc</sub>), 70.0 (C-5<sub>Man/Man'</sub>), 69.6 (C-2<sub>Man</sub>), 69.3\*, 69.1\*, 69.0 (C-5<sub>Man/Man'</sub>), 68.5\*, 66.4 (C-6<sub>Glc</sub>), 66.3\*, 66.1\*, 62.8 (C-6<sub>Man/Man'</sub>), 62.4 (C-6<sub>Man/Man'</sub>), 21.0 (CH<sub>3</sub>), 20.9 (2 CH<sub>3</sub>), 20.9 (CH<sub>3</sub>), 20.8 (2 CH<sub>3</sub>), 20.8 (2 CH<sub>3</sub>), 20.7 (CH<sub>3</sub>), 20.7 (CH<sub>3</sub>) ppm.

\*Assignment is ambiguous due to signal overlap (C-2<sub>Man'</sub>, C-3<sub>Glc</sub>, C-3<sub>Man</sub>, C-3<sub>Man'</sub>, C-4<sub>Man</sub>, C-4<sub>Man'</sub>)

**ESI-HRMS:**  $m/z$  = 967.31435 [M+NH<sub>4</sub>]<sup>+</sup> (calculated  $m/z$  = 967.31499).

## 2.23. 2,3,4,6-Tetra-O-acetyl- $\alpha$ -D-mannopyranosyl-(1 $\rightarrow$ 4)-[2,3,4,6-tetra-O-acetyl- $\alpha$ -D-mannopyranosyl-(1 $\rightarrow$ 6)]-2,3-di-O-acetyl- $\beta$ -D-galactopyranosyl azide (**25**)

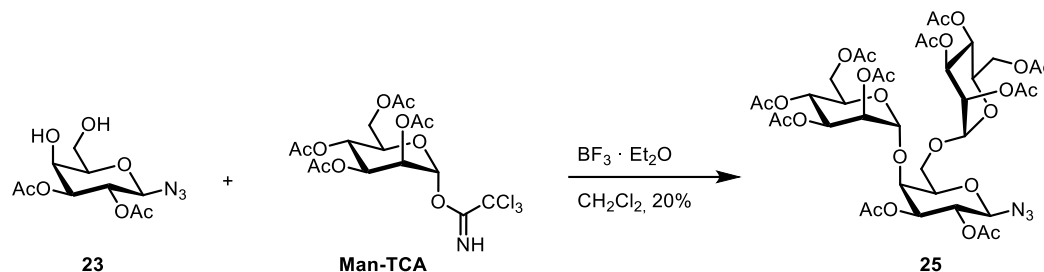

The acceptor galactosyl azide **23** (108 mg, 373  $\mu$ mol, 1 equiv) and the mannosyl donor Man-TCA (630 mg, 1.28  $\mu$ mol, 3.4 equiv) were dissolved in dry dichloromethane (12 mL) under nitrogen atmosphere, freshly activated molecular sieve (3Å, ~800 mg) was added and the reaction mixture stirred at room temperature for 15 min. At 0 °C boron trifluoride diethyl etherate (50  $\mu$ L, 395  $\mu$ mol, 1.1 equiv) was added and the reaction mixture was stirred at 0 °C for 2 h, followed by stirring at room temperature for 16 h. The reaction mixture was diluted with dichloromethane (150 mL) and satd. aq. NaHCO<sub>3</sub> solution (5 mL) and strongly stirred for 10 min. After filtration over celite® the phases were separated and the organic phase was washed with satd. aq. NaHCO<sub>3</sub> solution (20 mL), water (2 x 25 mL) and brine (20 mL). It was dried over MgSO<sub>4</sub>, filtrated and the solvent was removed under reduced pressure. The crude product was purified on silica gel via automated flash chromatography twice (first cyclohexane:ethyl acetate, 6:4 $\rightarrow$ 1:1, then toluene:ethyl acetate 4:6) to yield the product **25** as a colorless foam (71 mg, 74.8  $\mu$ mol, 20%).

$R_F$  (cyclohexane:ethyl acetate, 1:1) = 0.29.

$[\alpha]_D^{20}$  = +32.7 ( $c$  = 1.00 in CH<sub>2</sub>Cl<sub>2</sub>).

**IR (ATR):**  $\tilde{\nu}$  = 2940 (w), 2119 (m), 1743 (s), 1369 (m), 1218 (s), 1138 (m), 1084 (m), 1041 (s), 981 (m) cm<sup>-1</sup>.

**<sup>1</sup>H NMR** (500 MHz, CDCl<sub>3</sub>, 298 K)  $\delta$  = 5.41 (t, <sup>3</sup> $J_{3,4}$  = <sup>3</sup> $J_{4,5}$  = 10.1 Hz, 1H, H-4<sub>Man/Man'</sub>), 5.35 – 5.23 (m, 3H, H-3<sub>Man</sub>, H-3<sub>Man'</sub>, H-4<sub>Man/Man'</sub>), 5.19 – 5.11 (m, 3H, H-2<sub>Gal</sub>, H-2<sub>Man</sub>, H-2<sub>Man'</sub>), 5.00 (dd, <sup>3</sup> $J_{2,3}$  = 10.6 Hz, <sup>3</sup> $J_{3,4}$  = 2.9 Hz, 1H, H-3<sub>Gal</sub>), 4.96 (d, <sup>3</sup> $J_{1,2}$  = 1.7 Hz, 1H, H-1<sub>Man'</sub>), 4.79 (d, <sup>3</sup> $J_{1,2}$  = 2.0 Hz, 1H, H-1<sub>Man</sub>), 4.69 (d, <sup>3</sup> $J_{1,2}$  = 8.7 Hz, 1H, H-1<sub>Gal</sub>), 4.35 – 4.28 (m, 2H, H-6a<sub>Man</sub>, H-6a<sub>Man'</sub>), 4.22 (dt, <sup>3</sup> $J_{4,5}$  = 9.9 Hz, <sup>3</sup> $J_{5,6a}$  = <sup>3</sup> $J_{5,6b}$  = 2.9 Hz, 1H, H-5<sub>Man/Man'</sub>), 4.21 – 4.11 (m, 3H, H-4<sub>Gal</sub>, H-6b<sub>Man</sub>, H-6b<sub>Man'</sub>), 4.02 – 3.95 (m, 2H, H-5<sub>Man/Man'</sub>, H-6a<sub>Gal</sub>), 3.90 (dd, <sup>3</sup> $J_{5,6b}$  = 7.4 Hz, <sup>3</sup> $J_{5,6a}$  = 6.1 Hz, 1H, H-5<sub>Gal</sub>), 3.71 (dd, <sup>2</sup> $J$  = 9.4 Hz, <sup>3</sup> $J_{5,6b}$  = 7.6 Hz, 1H, H-6b<sub>Gal</sub>), 2.14 (s, 3H, OAc), 2.12 (s, 3H, OAc), 2.11 (s, 3H, OAc), 2.10 (s, 3H, OAc), 2.10 (s, 3H, OAc), 2.09 (s, 3H, OAc), 2.08 (s, 3H, OAc), 2.04 (s, 3H, OAc), 2.00 (s, 3H, OAc), 1.98 (s, 3H, OAc) ppm.

**<sup>13</sup>C NMR** (126 MHz, CDCl<sub>3</sub>, 298 K)  $\delta$  = 170.8 (C(O)CH<sub>3</sub>), 170.8 (C(O)CH<sub>3</sub>), 170.5 (C(O)CH<sub>3</sub>), 170.2 (C(O)CH<sub>3</sub>), 170.0 (C(O)CH<sub>3</sub>), 169.9 (C(O)CH<sub>3</sub>), 169.9 (C(O)CH<sub>3</sub>), 169.9 (C(O)CH<sub>3</sub>), 169.8 (C(O)CH<sub>3</sub>), 169.4 (C(O)CH<sub>3</sub>), 100.1 (C-1<sub>Man</sub>), 97.6 (C-1<sub>Man'</sub>), 88.3 (C-1<sub>Gal</sub>), 76.7 (C-4<sub>Gal</sub>), 74.5 (C-5<sub>Gal</sub>), 72.0 (C-3<sub>Gal</sub>), 69.8 (C-5<sub>Man/Man'</sub>), 69.5 (C-2<sub>Man/Man'</sub>), 69.1 (C-2<sub>Man/Man'</sub>), 69.1 (C-3<sub>Man/Man'</sub>), 68.9 (C-3<sub>Man/Man'</sub>), 68.8 (C-5<sub>Man/Man'</sub>), 68.5 (C-2<sub>Gal</sub>), 66.2 (C-4<sub>Man/Man'</sub>), 65.5 (C-4<sub>Man/Man'</sub>), 64.5 (C-6<sub>Gal</sub>), 62.5 (C-6<sub>Man/Man'</sub>), 62.0 (C-6<sub>Man/Man'</sub>), 21.0 (CH<sub>3</sub>), 21.0 (CH<sub>3</sub>), 20.9 (CH<sub>3</sub>), 20.9 (2 CH<sub>3</sub>), 20.8 (CH<sub>3</sub>), 20.8 (CH<sub>3</sub>), 20.8 (2 CH<sub>3</sub>) ppm.

**ESI-HRMS:**  $m/z$  = 967.31413 [M+NH<sub>4</sub>]<sup>+</sup> (calculated  $m/z$  = 967.31499).

## 2.24. $\alpha$ -D-Mannopyranosyl-(1 $\rightarrow$ 4)-[ $\alpha$ -D-mannopyranosyl-(1 $\rightarrow$ 6)]- $\beta$ -D-glucopyranosyl azide (**26**)

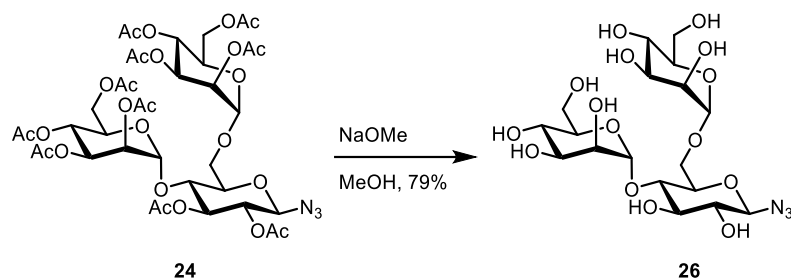

The protected trisaccharide **24** (36 mg, 37.9  $\mu$ mol, 1 equiv) was suspended in methanol (3 mL) and a solution of sodium methoxide in methanol (15  $\mu$ L, 75.0  $\mu$ mol, 5 M, 2 equiv) was added at room temperature. The reaction mixture was stirred at room temperature for 18 h. It was neutralized by addition of Amberlite®-IRC 120 H<sup>+</sup> resin and stirring for 15 min. The resin was filtered off and the filtrate was concentrated under reduced pressure. The crude was purified on reversed phase silica gel via automated flash chromatography (H<sub>2</sub>O:MeCN, 100:0 1 CV, 100:0  $\rightarrow$  0:100 over 16 CV) and lyophilized to obtain the product **26** as a lyophilizate (15.9 mg, 30.0  $\mu$ mol, 79%).

$[\alpha]_D^{20}$  = +61.7 ( $c$  = 0.08 in CH<sub>3</sub>OH).

**IR (ATR):**  $\tilde{\nu}$  = 3359 (br, m), 2924 (m), 2853 (m), 2122 (m), 1658 (m), 1632 (m), 1468 (w), 1411 (w), 1134 (m), 1052 (s), 972 (m), 811 (m) cm<sup>-1</sup>.

**<sup>1</sup>H NMR** (600 MHz, D<sub>2</sub>O, 298 K)  $\delta$  = 5.26 (d, <sup>3</sup> $J_{1,2}$  = 1.9 Hz, 1H, H-1<sub>Man</sub>), 4.94 (d, <sup>3</sup> $J_{1,2}$  = 1.8 Hz, 1H, H-1<sub>Man'</sub>), 4.74 (d, <sup>3</sup> $J_{1,2}$  = 8.8 Hz, 1H, H-1<sub>Glc</sub>), 4.07 – 4.03 (m, 1H, H-2<sub>Man</sub>), 4.02 – 3.98 (m, 1H, H-2<sub>Man'</sub>), 3.97 – 3.86 (m, 4H, H-6a<sub>Glc</sub>, H-6b<sub>Glc</sub>, H-6a<sub>Man</sub>, H-6a<sub>Man'</sub>), 3.85 – 3.74 (m, 5H, H-3<sub>Man</sub>, H-3<sub>Man'</sub>, H-5<sub>Glc</sub>, H-6b<sub>Man</sub>, H-6b<sub>Man'</sub>), 3.74 – 3.62 (m, 6H, H-3<sub>Glc</sub>, H-4<sub>Glc</sub>, H-4<sub>Man</sub>, H-4<sub>Man'</sub>, H-5<sub>Man</sub>, H-5<sub>Man'</sub>), 3.32 – 3.26 (m, 1H, H-2<sub>Glc</sub>) ppm.

**<sup>13</sup>C NMR** (151 MHz, D<sub>2</sub>O, 298 K)  $\delta$  = 101.1 (C-1<sub>Man</sub>), 100.1 (C-1<sub>Man'</sub>), 89.8 (C-1<sub>Glc</sub>), 76.3 (C-4<sub>Glc</sub>), 75.8\*, 75.2\*, 73.7\*, 72.8\*, 72.8 (C-2<sub>Glc</sub>), 70.5\*, 70.2\*, 70.2 (C-2<sub>Man</sub>), 69.9 (C-2<sub>Man'</sub>), 66.6\*, 66.5\*, 66.2 (C-6<sub>Glc</sub>), 60.9 (C-6<sub>Man/Man'</sub>), 60.8 (C-6<sub>Man/Man'</sub>) ppm.

\*Assignment is ambiguous due to signal overlap (C-3<sub>Glc</sub>, C-3<sub>Man</sub>, C-3<sub>Man'</sub>, C-4<sub>Man</sub>, C-4<sub>Man'</sub>, C-5<sub>Glc</sub>, C-5<sub>Man</sub>, C-5<sub>Man'</sub>).

**ESI-HRMS:**  $m/z$  = 547.17185 [M+NH<sub>4</sub>]<sup>+</sup> (calculated  $m/z$  = 547.20934).

## 2.25. $\alpha$ -D-Mannopyranosyl-(1 $\rightarrow$ 4)-[ $\alpha$ -D-mannopyranosyl-(1 $\rightarrow$ 6)]- $\beta$ -D-galactopyranosyl azide (**27**)

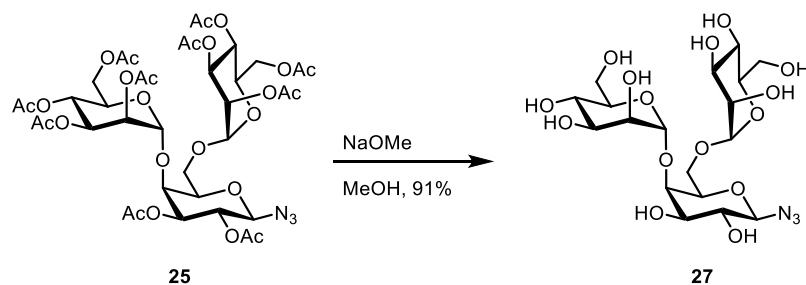

The protected trisaccharide **25** (51 mg, 53.7  $\mu\text{mol}$ , 1 equiv) was suspended in methanol (3 mL) and a solution of sodium methoxide in methanol (15  $\mu\text{L}$ , 75.0  $\mu\text{mol}$ , 5 M, 1.4 equiv) was added at room temperature. The reaction mixture was stirred at room temperature for 18 h. It was neutralized by addition of Amberlite<sup>®</sup>-IRC 120 H<sup>+</sup> resin and stirring for 15 min. The resin was filtered off and the filtrate was concentrated under reduced pressure. The crude was purified on reversed phase silica gel via automated flash chromatography (H<sub>2</sub>O:MeCN, 100:0 1 CV, 100:0  $\rightarrow$  0:100 over 16 CV) and lyophilized to obtain the product **27** as a lyophilizate (26 mg, 49.1  $\mu\text{mol}$ , 91%).

$[\alpha]_{\text{D}}^{20} = +46.6$  ( $c = 0.25$  in CH<sub>3</sub>OH).

**IR (ATR):**  $\tilde{\nu} = 3351$  (br, m), 2929 (w), 2120 (m), 1248 (m), 1131 (m), 1092 (s), 1047 (s), 1023 (s), 810 (m) cm<sup>-1</sup>.

**<sup>1</sup>H NMR** (500 MHz, D<sub>2</sub>O, 298 K)  $\delta = 4.89$  (d,  $^3J_{1,2} = 1.8$  Hz, 1H, H-1<sub>Man'</sub>), 4.85 (d,  $^3J_{1,2} = 1.9$ , 1H, H-1<sub>Man</sub>), 4.76 (d,  $^3J_{1,2} = 8.6$  Hz, 1H, H-1<sub>Gal</sub>), 4.10 (d,  $^3J_{3,4} = 3.2$  Hz, 1H, H-4<sub>Gal</sub>), 4.07 – 3.98 (m, 3H, H-2<sub>Man</sub>, H-5<sub>Man</sub>, H-5<sub>Man'</sub>), 3.96 (dd,  $^3J_{2,3} = 3.5$  Hz,  $^3J_{1,2} = 1.7$  Hz, 1H, H-2<sub>Man'</sub>), 3.93 – 3.86 (m, 2H, H-6a<sub>Gal</sub>, H-6a<sub>Man/Man'</sub>), 3.86 – 3.61 (m, 10H, H-3<sub>Gal</sub>, H-3<sub>Man</sub>, H-3<sub>Man'</sub>, H-4<sub>Man</sub>, H-4<sub>Man'</sub>, H-5<sub>Gal</sub>, H-6a<sub>Man/Man'</sub>, H-6b<sub>Man</sub>, H-6b<sub>Man'</sub>, H-6b<sub>Gal</sub>), 3.48 (dd,  $^3J_{2,3} = 10.2$  Hz,  $^3J_{1,2} = 8.6$  Hz, 1H, H-2<sub>Gal</sub>) ppm.

**<sup>13</sup>C NMR** (126 MHz, D<sub>2</sub>O, 298 K)  $\delta = 104.5$  (C-1<sub>Man</sub>), 102.6 (C-1<sub>Man'</sub>), 93.6 (C-1<sub>Gal</sub>), 80.1 (C-4<sub>Gal</sub>), 77.5 (C-5<sub>Man/Man'</sub>), 75.9 (C-5<sub>Man/Man'</sub>), 75.8 (C-5<sub>Gal</sub>), 74.8\*, 73.2\*, 73.2\*, 73.1 (C-2<sub>Gal</sub>), 72.9 (C-2<sub>Man</sub>), 72.7 (C-2<sub>Man'</sub>), 69.5\*, 69.2\*, 68.2 (C-6<sub>Gal</sub>), 63.7 (C-6<sub>Man/Man'</sub>), 63.4 (C-6<sub>Man/Man'</sub>) ppm.

\*Assignment is ambiguous due to signal overlap (C-3<sub>Gal</sub>, C-3<sub>Man</sub>, C-3<sub>Man'</sub>, C-4<sub>Man</sub>, C-4<sub>Man'</sub>)

**ESI-HRMS:**  $m/z = 547.20912$  [M+NH<sub>4</sub>]<sup>+</sup> (calculated  $m/z = 547.20934$ ).

## 2.26. 2,3,4,6-Tetra-O-benzoyl- $\alpha$ -D-glucopyranosyl-(1 $\rightarrow$ 4)-1,6-di-O-acetyl-2,3-di-O-benzoyl- $\alpha,\beta$ -D-glucopyranose (**28**)

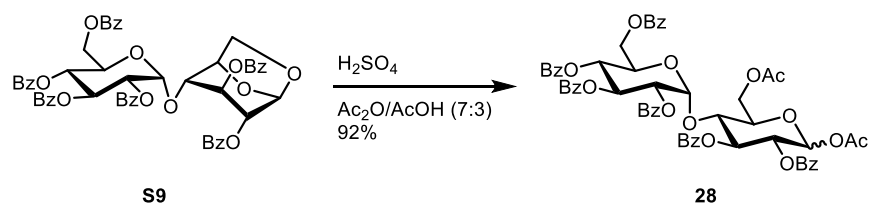

The benzoyl-protected disaccharide **S9** (960 mg, 1.01 mmol, 1 equiv) was dissolved in a mixture of acetic anhydride (9.9 mL) and acetic acid (4.2 mL). While stirring at room temperature,

concentrated sulfuric acid (175  $\mu$ L, 3.31 mmol, 3.3 equiv) was added and stirred for 1 h. Ethyl acetate (50 mL) was added and the reaction mixture was poured into a satd. aq. NaHCO<sub>3</sub> solution (100 mL) at 0 °C. The mixture was vigorously stirred for 2h, then the phases were separated. The organic phase was washed with water (50 mL) and brine (20 mL), dried over MgSO<sub>4</sub>, filtrated and the solvent was removed under reduced pressure. The residue was codistilled with toluene (4 x 25 mL) to yield the product **28** as a colorless foam (980 mg, 932  $\mu$ mol, 92%).

Ratio  $\alpha$ : $\beta$  (83:17) deduced from <sup>1</sup>H NMR signals of H-1<sub>Glc- $\alpha$</sub>  and H-2<sub>Glc- $\beta$</sub> .

*R*<sub>F</sub> (cyclohexane:ethyl acetate, 4:1) = 0.18.

[ $\alpha$ ]<sub>D</sub><sup>20</sup> = +85.1 (*c* = 1.00 in CH<sub>2</sub>Cl<sub>2</sub>).

**IR (ATR):**  $\tilde{\nu}$  = 2959 (w), 1725 (s), 1602 (m), 1584 (w), 1451 (m), 1371 (w), 1262 (s), 1177 (m), 1092 (s), 1068 (s), 1025 (s) cm<sup>-1</sup>.

$\alpha$ -Anomer:

**<sup>1</sup>H NMR** (600 MHz, CDCl<sub>3</sub>, 298 K)  $\delta$  = 8.10 – 7.18 (m, 30H, OBz), 6.49 (d, <sup>3</sup>*J*<sub>1,2</sub> = 3.6 Hz, 1H, H-1<sub>Glc</sub>), 6.08 (dd, <sup>3</sup>*J*<sub>2,3</sub> = 10.6 Hz, <sup>3</sup>*J*<sub>3,4</sub> = 9.6 Hz, 1H, H-3<sub>Glc'</sub>), 6.02 (dd, <sup>3</sup>*J*<sub>2,3</sub> = 10.2 Hz, <sup>3</sup>*J*<sub>3,4</sub> = 8.9 Hz, 1H, H-3<sub>Glc</sub>), 5.75 (d, <sup>3</sup>*J*<sub>1,2</sub> = 3.9 Hz, 1H, H-1<sub>Glc'</sub>), 5.72 (t, <sup>3</sup>*J*<sub>3,4</sub> = <sup>3</sup>*J*<sub>4,5</sub> = 9.8 Hz, 1H, H-4<sub>Glc'</sub>), 5.27 (dd, <sup>3</sup>*J*<sub>2,3</sub> = 10.6 Hz, <sup>3</sup>*J*<sub>1,2</sub> = 3.9 Hz, 1H, H-2<sub>Glc'</sub>), 5.23 (dd, <sup>3</sup>*J*<sub>2,3</sub> = 10.2 Hz, <sup>3</sup>*J*<sub>1,2</sub> = 3.6 Hz, 1H, H-2<sub>Glc</sub>), 4.71 – 4.62 (m, 2H, H-6a<sub>Glc</sub>, H-6a<sub>Glc'</sub>), 4.48 – 4.37 (m, 4H, H-4<sub>Glc</sub>, H-5<sub>Glc'</sub>, H-6b<sub>Glc</sub>, H-6b<sub>Glc'</sub>), 4.35 (ddd, <sup>3</sup>*J*<sub>4,5</sub> = 9.9 Hz, <sup>3</sup>*J*<sub>5,6a</sub> = 3.9 Hz, <sup>3</sup>*J*<sub>5,6b</sub> = 2.5 Hz, 1H, H-5<sub>Glc</sub>), 2.21 (s, 3H, OAc), 2.20 (s, 3H, OAc) ppm.

**<sup>13</sup>C NMR** (151 MHz, CDCl<sub>3</sub>, 298 K)  $\delta$  = 170.8 (C(O)CH<sub>3</sub>), 169.0 (C(O)CH<sub>3</sub>), 166.2 (PhCO), 165.9 (PhCO), 165.6 (PhCO), 165.6 (PhCO), 165.2 (PhCO), 165.1 (PhCO), 133.6 (OBz<sub>para</sub>), 133.5 (OBz<sub>para</sub>), 133.4 (2 OBz<sub>para</sub>), 133.4 (OBz<sub>para</sub>), 133.3 (OBz<sub>para</sub>), 130.1 (OBz), 130.0 (OBz), 130.0 (OBz), 129.9 (OBz), 129.7 (OBz), 129.7 (OBz), 128.9 (OBz), 128.6 (OBz), 128.6 (OBz), 128.5 (OBz), 128.5 (OBz), 128.4 (OBz), 128.3 (OBz), 128.2 (OBz), 97.2 (C-1<sub>Glc'</sub>), 89.1 (C-1<sub>Glc</sub>), 73.5 (C-4<sub>Glc</sub>), 72.1 (C-3<sub>Glc</sub>), 71.1 (C-2<sub>Glc'</sub>), 70.9 (C-2<sub>Glc</sub>), 70.7 (C-5<sub>Glc</sub>), 69.9 (C-3<sub>Glc'</sub>), 69.4 (C-5<sub>Glc'</sub>), 69.2 (C-4<sub>Glc'</sub>), 62.8 (C-6<sub>Glc/Glc'</sub>), 62.4 (C-6<sub>Glc/Glc'</sub>), 21.1 (CH<sub>3</sub>), 21.0 (CH<sub>3</sub>) ppm.

$\beta$ -Anomer:

**<sup>1</sup>H NMR** (600 MHz, CDCl<sub>3</sub>, 298 K)  $\delta$  = 8.10 – 7.18 (m, 30H, OBz), 6.07 – 5.98 (m, 2H, H-1<sub>Glc</sub>, H-3<sub>Glc'</sub>), 5.78 – 5.66 (m, 3H, H-1<sub>Glc'</sub>, H-3<sub>Glc</sub>, H-4<sub>Glc'</sub>), 5.38 (dd, <sup>3</sup>*J*<sub>2,3</sub> = 9.4 Hz, <sup>3</sup>*J*<sub>1,2</sub> = 7.9 Hz, 1H, H-2<sub>Glc</sub>), 5.30 – 5.20 (m, 1H, H-2<sub>Glc'</sub>), 4.71 – 4.62 (m, 2H, H-6a<sub>Glc</sub>, H-6a<sub>Glc'</sub>), 4.48 – 4.38 (m, 4H, H-4<sub>Glc</sub>, H-5<sub>Glc'</sub>, H-6b<sub>Glc</sub>, H-6b<sub>Glc'</sub>), 4.14 – 4.09 (m, 1H, H-5<sub>Glc</sub>), 2.19 (s, 3H, OAc), 2.04 (s, 3H, OAc) ppm.

**ESI-HRMS:** *m/z* = 1068.32808 [M+NH<sub>4</sub>]<sup>+</sup> (calculated *m/z* = 1068.32845).



**2.27. 2,3,4,6-Tetra-O-benzoyl- $\alpha$ -D-glucopyranosyl-(1 $\rightarrow$ 4)-6-O-acetyl-2,3-di-O-benzoyl- $\beta$ -D-glucopyranosyl azide (**29**)**

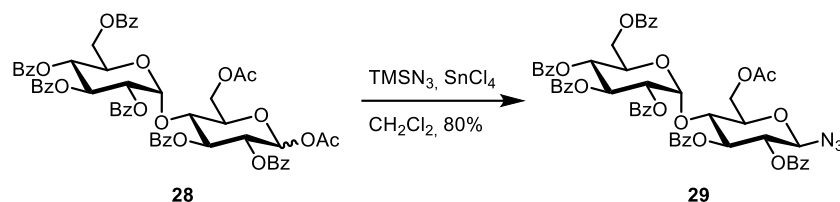

The protected maltose **28** (3.54 g, 3.37 mmol, 1 equiv) was dissolved in dry dichloromethane (34 mL) under a nitrogen atmosphere. At room temperature trimethylsilyl azide (1.75 mL, 13.3 mmol, 3.6 equiv) and a solution of tin(IV) chloride in dichloromethane (1.45 mL, 1 M, 1.45 mmol, 0.43 equiv) were added and stirred for 22 h. The reaction mixture was diluted with dichloromethane (50 mL) and satd. aq. NaHCO<sub>3</sub> solution (25 mL) and strongly stirred for 15 min. The separated org. phase was washed with satd. aq. NaHCO<sub>3</sub> solution (2 x 100 mL), water (100 mL) and brine (100 mL). The organic phase was dried over MgSO<sub>4</sub>, filtrated and the solvent was removed under reduced pressure. The crude product was purified on silica gel (cyclohexane:ethyl acetate, 3:1) to yield the product **29** as colorless foam (2.79 g, 2.70 mmol, 80%).

$R_F$  (cyclohexane:ethyl acetate, 3:1) = 0.22

$[\alpha]_D^{20} = +35.2$  ( $c = 0.72$  in CH<sub>2</sub>Cl<sub>2</sub>).

**IR (ATR):**  $\tilde{\nu} = 2955$  (w), 2119 (m), 1723 (s), 1603 (w), 1452 (m), 1248 (s), 1091 (s), 1068 (s), 1025 (s), 704 (s) cm<sup>-1</sup>.

**<sup>1</sup>H NMR** (600 MHz, CDCl<sub>3</sub>, 298 K)  $\delta = 8.11 - 7.16$  (m, 30H, 6 OBz), 6.05 (dd,  $^3J_{2,3} = 10.5$  Hz,  $^3J_{3,4} = 9.6$  Hz, 1H, H-3<sub>Glc'</sub>), 5.77 – 5.65 (m, 3H, H-1<sub>Glc'</sub>, H-3<sub>Glc</sub>, H-4<sub>Glc'</sub>), 5.25 (dd,  $^3J_{2,3} = 10.5$  Hz,  $^3J_{1,2} = 4.0$  Hz, 1H, H-2<sub>Glc'</sub>), 5.22 (dd,  $^3J_{2,3} = 9.5$  Hz,  $^3J_{1,2} = 8.5$  Hz, 1H, H-2<sub>Glc</sub>), 4.86 (d,  $^3J_{1,2} = 8.5$  Hz, 1H, H-1<sub>Glc</sub>), 4.76 (dd,  $^2J = 12.2$  Hz,  $^3J_{5,6a} = 2.6$  Hz, 1H, H-6a<sub>Glc</sub>), 4.69 – 4.61 (m, 1H, H-6a<sub>Glc'</sub>), 4.48 – 4.41 (m, 3H, H-5<sub>Glc'</sub>, H-6b<sub>Glc</sub>, H-6b<sub>Glc'</sub>), 4.39 (t,  $^3J_{3,4} = ^3J_{4,5} = 9.2$  Hz, 1H, H-4<sub>Glc</sub>), 4.05 (ddd,  $^3J_{4,5} = 9.6$  Hz,  $^3J_{5,6b} = 4.5$  Hz,  $^3J_{5,6a} = 2.6$  Hz, 1H, H-5<sub>Glc</sub>), 2.20 (s, 3H, OAc) ppm.

**<sup>13</sup>C NMR** (151 MHz, CDCl<sub>3</sub>, 298 K)  $\delta = 170.7$  (C(O)CH<sub>3</sub>), 166.2 (PhC=O), 165.8 (PhC=O), 165.6 (PhC=O), 165.2 (PhC=O), 165.2 (PhC=O), 165.0 (PhC=O), 133.6 (OBz<sub>para</sub>), 133.5 (OBz<sub>para</sub>), 133.5 (OBz<sub>para</sub>), 133.4 (OBz<sub>para</sub>), 133.4 (OBz<sub>para</sub>), 133.3 (OBz<sub>para</sub>), 130.1 (OBz), 130.0 (OBz), 130.0 (OBz), 129.9 (OBz), 129.8 (OBz), 129.7 (OBz), 129.6 (OBz), 129.7 (OBz), 129.6 (OBz), 129.0 (OBz), 128.8 (OBz), 128.7 (OBz), 128.7 (OBz), 128.6 (OBz), 128.6 (OBz), 128.5 (OBz), 128.5 (OBz), 128.4 (OBz), 128.3 (OBz), 128.2 (OBz), 96.7 (C-1<sub>Glc'</sub>), 87.9 (C-1<sub>Glc</sub>), 74.9 (C-5<sub>Glc</sub>), 74.8 (C-3<sub>Glc</sub>), 73.1 (C-4<sub>Glc</sub>), 71.7 (C-2<sub>Glc</sub>), 71.0 (C-2<sub>Glc'</sub>), 70.0 (C-3<sub>Glc'</sub>), 69.4 (C-5<sub>Glc'</sub>), 69.2 (C-4<sub>Glc'</sub>), 62.8 (C-6<sub>Glc</sub>), 62.5 (C-6<sub>Glc'</sub>), 21.0 (CH<sub>3</sub>) ppm.

**ESI-HRMS:**  $m/z = 1051.32361$  [M+NH<sub>4</sub>]<sup>+</sup> (calculated  $m/z = 1051.32437$ ).

**2.28. 2,3,4,6-Tetra-O-benzoyl- $\alpha$ -D-glucopyranosyl-(1 $\rightarrow$ 4)-2,3-di-O-benzoyl- $\beta$ -D-glucopyranosyl azide (**30**)**

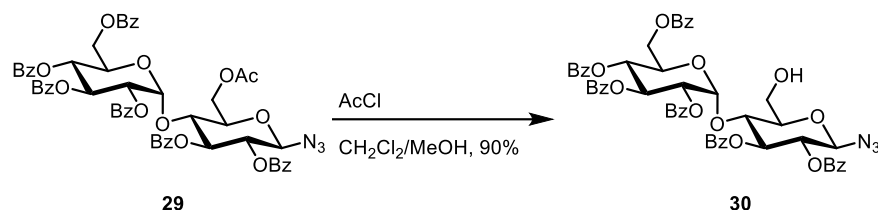

The maltosyl azide **29** (2.72 g, 2.63 mmol, 1 equiv) was dissolved in a mixture of dichloromethane/methanol (1:1 v/v, 50 mL) and cooled to 0 °C. Acetyl chloride (1.7 mL, 23.8 mmol, 9 equiv) was added dropwise over a period of 5 min and stirred for 2 h at 0 °C, followed by stirring at room temperature for 16 h. Triethylamine (5 mL) was added and the solvent removed under reduced pressure. The crude was suspended in ethyl acetate (50 mL), filtrated and the filtrate evaporated to dryness under reduced pressure. The filtrate was purified on silica gel (cyclohexane:ethyl acetate, 3:1) to yield the product **30** as colorless amorphous solid (2.33 g, 2.35 mmol, 90%).

$R_F$  (cyclohexane:ethyl acetate, 3:1) = 0.18.

$[\alpha]_D^{20} = +24.4$  ( $c = 1.00$  in CH<sub>2</sub>Cl<sub>2</sub>).

**IR (ATR):**  $\tilde{\nu} = 3512$  (w), 2928 (w), 2118 (m), 1723 (s), 1602 (m), 1451 (m), 1263 (s), 1090 (s), 1067 (s), 1025 (s), 704 (s) cm<sup>-1</sup>.

**<sup>1</sup>H NMR** (500 MHz, CDCl<sub>3</sub>, 298 K)  $\delta = 8.10 - 7.17$  (m, 30H, 6 OBz), 6.04 (dd,  $^3J_{2,3} = 10.4$  Hz,  $^3J_{3,4} = 9.6$  Hz, 1H, H-3<sub>Glc'</sub>), 5.79 – 5.71 (m, 2H, H-1<sub>Glc'</sub>, H-3<sub>Glc</sub>), 5.66 (t,  $^3J_{3,4} = ^3J_{4,5} = 9.8$  Hz, 1H, H-4<sub>Glc'</sub>), 5.26 – 5.19 (m, 2H, H-2<sub>Glc</sub>, H-2<sub>Glc'</sub>), 4.87 (d,  $^3J_{1,2} = 8.6$  Hz, 1H, H-1<sub>Glc</sub>), 4.70 – 4.63 (m, 1H, H-6a<sub>Glc'</sub>), 4.58 – 4.46 (m, 3H, H-4<sub>Glc</sub>, H-5<sub>Glc'</sub>, H-6b<sub>Glc'</sub>), 4.21 – 4.06 (m, 2H, H-6a<sub>Glc</sub>, H-6b<sub>Glc</sub>), 3.87 (dt,  $^3J_{4,5} = 9.6$  Hz,  $^3J_{5,6a} = ^3J_{5,6b} = 2.8$  Hz, 1H, H-5<sub>Glc</sub>), 2.25 (dd,  $^3J_{OH,6a} = 8.3$  Hz,  $^3J_{OH,6b} = 5.1$  Hz, 1H, OH) ppm.

**<sup>13</sup>C NMR** (126 MHz, CDCl<sub>3</sub>, 298 K)  $\delta = 166.5$  (PhC=O), 165.9 (PhC=O), 165.5 (PhC=O), 165.3 (PhC=O), 165.2 (PhC=O), 165.2 (PhC=O), 133.6 (OBz<sub>para</sub>), 133.5 (OBz<sub>para</sub>), 133.5 (OBz<sub>para</sub>), 133.4 (OBz<sub>para</sub>), 133.4 (OBz<sub>para</sub>), 133.3 (OBz<sub>para</sub>), 130.1 (OBz), 130.0 (OBz), 130.0 (OBz), 129.9 (OBz), 129.8 (OBz), 129.7 (OBz), 129.0 (OBz), 128.9 (OBz), 128.7 (OBz), 128.7 (OBz), 128.6 (OBz), 128.5 (OBz), 128.5 (OBz), 128.4 (OBz), 128.4 (OBz), 128.4 (OBz), 128.3 (OBz), 96.3 (C-1<sub>Glc'</sub>), 88.3 (C-1<sub>Glc</sub>), 77.3 (C-5<sub>Glc</sub>), 75.0 (C-3<sub>Glc</sub>), 71.8 (C-2<sub>Glc/Glc'</sub>), 71.0 (C-2<sub>Glc/Glc'</sub>), 70.9 (C-4<sub>Glc</sub>), 70.1 (C-3<sub>Glc'</sub>), 69.5 (C-4<sub>Glc'</sub>), 69.0 (C-5<sub>Glc'</sub>), 63.1 (C-6<sub>Glc'</sub>), 61.5 (C-6<sub>Glc</sub>) ppm.

**ESI-HRMS:**  $m/z = 1009.31262$  [M+NH<sub>4</sub>]<sup>+</sup> (calculated  $m/z = 1009.31381$ ).

**2.29. 2,3,4,6-Tetra-O-benzoyl- $\alpha$ -D-glucoopyranosyl-(1 $\rightarrow$ 4)-[2,3,4,6-tetra-O-acetyl- $\alpha$ -D-mannopyranosyl-(1 $\rightarrow$ 6)]-2,3-di-O-benzoyl- $\beta$ -D-glucopyranosyl azide (**31**)**

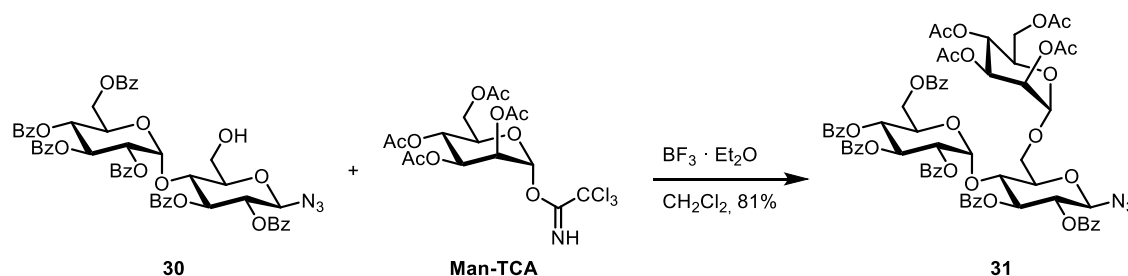

The acceptor maltosyl azide **30** (497 mg, 501  $\mu$ mol, 1 equiv) and the mannosyl donor Man-TCA (362 mg, 734  $\mu$ mol, 1.5 equiv) were dissolved in dry dichloromethane (15 mL) under nitrogen atmosphere, freshly activated molecular sieve (3Å, ~600 mg) was added and the reaction mixture stirred at room temperature for 15 min. At 0 °C boron trifluoride diethyl etherate (70  $\mu$ L, 552  $\mu$ mol, 1.1 equiv) was added and the reaction mixture was stirred at 0 °C for 2 h, followed by stirring at room temperature for 16 h. The reaction mixture was diluted with dichloromethane (50 mL) and satd. aq. NaHCO<sub>3</sub> solution (10 mL) and strongly stirred for 30 min. After filtration over celite® the phases were separated and the organic phase was washed with water (75 mL) and brine (75 mL). The organic phase was dried over MgSO<sub>4</sub>, it was filtrated and the solvent was removed under reduced pressure. The crude product was purified on silica gel (cyclohexane:ethyl acetate, 2:1) to yield the product **31** as a colorless foam (534 mg, 404  $\mu$ mol, 81%).

$R_F$  (cyclohexane:ethyl acetate, 2:1) = 0.28.

$[\alpha]_D^{20}$  = +18.8 ( $c$  = 0.16 in CH<sub>2</sub>Cl<sub>2</sub>).

**IR (ATR):**  $\tilde{\nu}$  = 2950 (w), 2119 (m), 1725 (s), 1452 (m), 1368 (m), 1247 (s), 1089 (s), 1067 (s), 1025 (s), 706 (s) cm<sup>-1</sup>.

**<sup>1</sup>H NMR** (600 MHz, CDCl<sub>3</sub>, 298 K)  $\delta$  = 8.06 – 7.13 (m, 30H, 6 OBz), 6.05 (dd,  $^3J_{2,3}$  = 10.4 Hz,  $^3J_{3,4}$  = 9.6 Hz, 1H, H-3<sub>Glc'</sub>), 5.76 – 5.71 (m, 2H, H-1<sub>Glc'</sub>, H-3<sub>Glc</sub>), 5.63 (t,  $^3J_{3,4}$  =  $^3J_{4,5}$  = 9.8 Hz, 1H, H-4<sub>Glc'</sub>), 5.43 – 5.37 (m, 2H, H-2<sub>Man</sub>, H-3<sub>Man</sub>), 5.32 (t,  $^3J_{3,4}$  =  $^3J_{4,5}$  = 9.9 Hz, 1H, H-4<sub>Man</sub>), 5.26 (dd,  $^3J_{2,3}$  = 10.4 Hz,  $^3J_{1,2}$  = 4.0 Hz, 1H, H-2<sub>Glc'</sub>), 5.21 (dd,  $^3J_{2,3}$  = 9.4 Hz,  $^3J_{1,2}$  = 8.5 Hz, 1H, H-2<sub>Glc</sub>), 5.08 (d,  $^3J_{1,2}$  = 1.7 Hz, 1H, H-1<sub>Man</sub>), 4.89 (d,  $^3J_{1,2}$  = 8.5 Hz, 1H, H-1<sub>Glc'</sub>), 4.62 – 4.54 (m, 2H, H-6a<sub>Glc'</sub>, H-6b<sub>Glc'</sub>), 4.49 (dt,  $^3J_{4,5}$  = 10.0 Hz,  $^3J_{5,6a}$  =  $^3J_{5,6b}$  = 4.0 Hz, 1H, H-5<sub>Glc'</sub>), 4.35 – 4.31 (m, 1H, H-4<sub>Glc</sub>), 4.29 (dd,  $^2J$  = 12.3 Hz,  $^3J_{5,6a}$  = 4.7 Hz, 1H, H-6a<sub>Man</sub>), 4.22 – 4.17 (m, 2H, H-5<sub>Man</sub>, H-6a<sub>Glc</sub>), 4.17 – 4.09 (m, 2H, H-6b<sub>Glc</sub>, H-6b<sub>Man</sub>), 4.04 (ddd,  $^3J_{4,5}$  = 9.7 Hz,  $^3J_{5,6a}$  = 5.6 Hz,  $^3J_{5,6b}$  = 2.1 Hz, 1H, H-5<sub>Glc</sub>), 2.15 (s, 3H, OAc), 2.11 (s, 3H, OAc), 1.99 (s, 3H, OAc), 1.94 (s, 3H, OAc) ppm.

**<sup>13</sup>C NMR** (151 MHz, CDCl<sub>3</sub>, 298 K)  $\delta$  = 170.8 (C(O)CH<sub>3</sub>), 170.0 (2 C(O)CH<sub>3</sub>), 170.0 (C(O)CH<sub>3</sub>), 166.1 (PhCO), 165.8 (PhCO), 165.6 (PhCO), 165.3 (PhCO), 165.1 (PhCO), 165.1 (PhCO), 133.5 (OBz<sub>para</sub>), 133.5 (OBz<sub>para</sub>), 133.5 (OBz<sub>para</sub>), 133.4 (OBz<sub>para</sub>), 133.3 (OBz<sub>para</sub>), 133.3 (OBz<sub>para</sub>), 130.1 (OBz), 130.0 (OBz), 130.0 (OBz), 129.9 (OBz), 129.8 (OBz), 129.7 (OBz), 129.6 (OBz), 129.0 (OBz), 128.9 (OBz), 128.8 (OBz), 128.7 (OBz), 128.6 (OBz), 128.5 (OBz), 128.5 (OBz), 128.4 (OBz), 128.3 (OBz), 128.3 (OBz), 98.0 (C-1<sub>Man</sub>), 96.5 (C-1<sub>Glc'</sub>), 87.8 (C-1<sub>Glc</sub>), 76.5 (C-5<sub>Glc</sub>), 74.6 (C-3<sub>Glc</sub>), 73.3 (C-4<sub>Glc</sub>), 71.6 (C-2<sub>Glc</sub>), 71.0 (C-2<sub>Glc'</sub>), 69.9 (C-3<sub>Glc</sub>/C-4<sub>Glc</sub>), 69.9 (C-3<sub>Glc'</sub>/C-4<sub>Glc'</sub>), 69.3

(C-2<sub>Man</sub>/C-3<sub>Man</sub>), 69.3 (C-2<sub>Man</sub>/C-3<sub>Man</sub>), 69.1 (C-5<sub>Man</sub>), 69.0 (C-5<sub>Glc</sub>'), 66.4 (C-6<sub>Glc</sub>'), 66.0 (C-4<sub>Man</sub>), 63.2 (C-6<sub>Glc</sub>'), 62.5 (C-6<sub>Man</sub>), 21.0 (CH<sub>3</sub>), 20.9 (CH<sub>3</sub>), 20.8 (CH<sub>3</sub>), 20.7 (CH<sub>3</sub>) ppm.

**ESI-HRMS:**  $m/z$  = 1339.40881 [M+NH<sub>4</sub>]<sup>+</sup> (calculated  $m/z$  = 1339.40889).

### 2.30. $\alpha$ -D-glucopyranosyl-(1 $\rightarrow$ 4)-[ $\alpha$ -D-mannopyranosyl-(1 $\rightarrow$ 6)]- $\beta$ -D-glucopyranosyl azide (**32**)

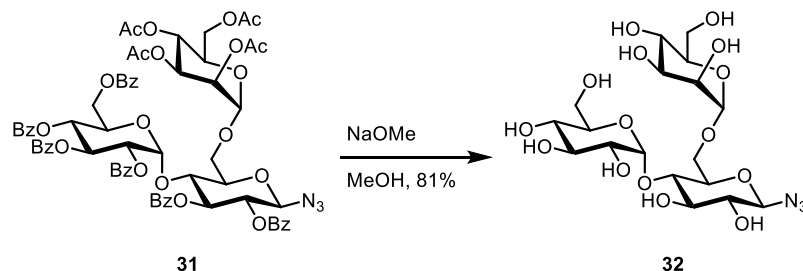

The protected trisaccharide **31** (200 mg, 152  $\mu$ mol, 1 equiv) was suspended in methanol (10 mL) and a solution of sodium methoxide in methanol (50  $\mu$ L, 250  $\mu$ mol, 5 M, 1.6 equiv) was added at room temperature. The reaction mixture was stirred at room temperature for 18 h. It was neutralized by addition of Amberlite®-IRC 120 H<sup>+</sup> resin and stirring for 20 min. The resin was filtered off and the filtrate was concentrated under reduced pressure. The crude was purified on reversed phase silica gel via automated flash chromatography (H<sub>2</sub>O:MeCN, 100:0 1 CV, 100:0  $\rightarrow$  0:100 over 16 CV) and lyophilized to obtain the product **32** as a lyophilizate (64.8 mg, 122  $\mu$ mol, 81%).

$[\alpha]_{\text{D}}^{20}$  = +73.1 ( $c$  = 0.74 in CH<sub>3</sub>OH).

**IR (ATR):**  $\tilde{\nu}$  = 3304 (br, m), 2929 (w), 2120 (m), 1361 (w), 1139 (m), 1019 (s) cm<sup>-1</sup>.

**<sup>1</sup>H NMR** (600 MHz, CD<sub>3</sub>OD, 298 K)  $\delta$  = 5.14 (d, <sup>3</sup> $J_{1,2}$  = 3.8 Hz, 1H, H-1<sub>Glc</sub>'), 4.85\* (m, 1H, H-1<sub>Man</sub>), 4.52 (d, <sup>3</sup> $J_{1,2}$  = 8.7 Hz, 1H, H-1<sub>Glc</sub>), 4.04 (dd, <sup>2</sup> $J$  = 11.8 Hz, <sup>3</sup> $J_{5,6a}$  = 4.5 Hz, 1H, H-6a<sub>Glc</sub>), 3.89 – 3.79 (m, 4H, H-2<sub>Man</sub>, H-6b<sub>Glc</sub>, H-6a<sub>Glc</sub>', H-6a<sub>Man</sub>), 3.74 – 3.51 (m, 10H, H-3<sub>Glc</sub>, H-3<sub>Glc</sub>', H-3<sub>Man</sub>, H-4<sub>Glc</sub>, H-4<sub>Glc</sub>', H-4<sub>Man</sub>, H-5<sub>Glc</sub>, H-5<sub>Glc</sub>'/Man, H-6b<sub>Glc</sub>', H-6b<sub>Man</sub>), 3.44 (dd, <sup>3</sup> $J_{2,3}$  = 9.7 Hz, <sup>3</sup> $J_{1,2}$  = 3.7 Hz, 1H, H-2<sub>Glc</sub>'), 3.27 (m, 1H, H-5<sub>Glc</sub>'/Man), 3.17 (t, <sup>3</sup> $J_{1,2}$  = <sup>3</sup> $J_{2,3}$  = 8.9 Hz, 1H, H-2<sub>Glc</sub>) ppm.

\*Signal shift was determined by <sup>1</sup>H-<sup>13</sup>C HSQC NMR due to signal overlap with HDO.

**<sup>13</sup>C NMR** (151 MHz, CD<sub>3</sub>OD, 298 K)  $\delta$  = 102.9 (C-1<sub>Glc</sub>'), 102.3 (C-1<sub>Man</sub>), 91.8 (C-1<sub>Glc</sub>), 81.1\*\*, 77.6\*\*, 77.4\*\*, 75.1\*\*, 74.9\*\*, 74.6\*\*, 74.4 (C-2<sub>Glc</sub>), 74.3 (C-2<sub>Glc</sub>'), 72.6\*\*, 72.0 (C-2<sub>Man</sub>), 71.4 (C-5<sub>Glc</sub>'/Man), 68.7\*\*, 67.6 (C-6<sub>Glc</sub>'), 63.1 (C-6<sub>Glc</sub>'/Man), 62.6 (C-6<sub>Glc</sub>'/Man) ppm.

\*\* Assignment is ambiguous due to signal overlap (C-3<sub>Glc</sub>, C-3<sub>Glc</sub>', C-3<sub>Man</sub>, C-4<sub>Glc</sub>, C-4<sub>Glc</sub>', C-4<sub>Man</sub>, C-5<sub>Glc</sub>, C-5<sub>Glc</sub>'/Man).

**ESI-HRMS:**  $m/z$  = 547.20911 [M+NH<sub>4</sub>]<sup>+</sup> (calculated  $m/z$  = 547.20934).

**2.31. 2,3,4,6-Tetra-O-benzoyl- $\beta$ -D-glucopyranosyl-(1 $\rightarrow$ 3)-6-O-acetyl-2,4-di-O-benzoyl- $\beta$ -D-glucopyranosyl azide (**34**)**

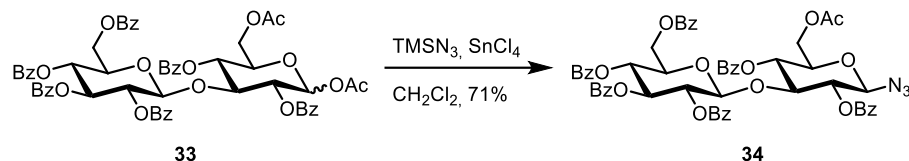

The protected disaccharide **33**<sup>[7]</sup> (868 mg, 826  $\mu$ mol, 1 equiv) was dissolved in dry dichloromethane (20 mL) under a nitrogen atmosphere. At room temperature trimethylsilyl azide (440  $\mu$ L, 3.35 mmol, 4 equiv) and a solution of tin(IV) chloride in dichloromethane (370  $\mu$ L, 1 M, 370  $\mu$ mol, 0.45 equiv) were added and stirred for 18 h. The reaction mixture was diluted with dichloromethane (50 mL) and washed with satd. aq. NaHCO<sub>3</sub> solution (3 x 50 mL), water (2 x 50 mL) and brine (50 mL). The organic phase was dried over MgSO<sub>4</sub>, filtrated and the solvent was removed under reduced pressure. The crude was purified on silica gel via automated flash chromatography (cyclohexane:ethyl acetate, 80:20 $\rightarrow$ 70:30) to yield the product **34** as a colorless foam (605 mg, 585  $\mu$ mol, 71%).

$R_F$  (cyclohexane:ethyl acetate, 3:1) = 0.18.

$[\alpha]_D^{20}$  = -59.7 ( $c$  = 0.91 in CH<sub>2</sub>Cl<sub>2</sub>).

**IR (ATR):**  $\tilde{\nu}$  = 2118 (m), 1732 (s), 1602 (m), 1451 (m), 1259 (s), 1089 (s), 1067 (s), 705 (s) cm<sup>-1</sup>.

**<sup>1</sup>H NMR** (600 MHz, CDCl<sub>3</sub>, 298 K)  $\delta$  = 8.13 – 7.15 (m, 30H, 6 OBz), 5.62 (t, <sup>3</sup> $J_{2,3}$  = <sup>3</sup> $J_{3,4}$  = 9.6 Hz, 1H, H-3<sub>Glc'</sub>), 5.42 (t, <sup>3</sup> $J_{3,4}$  = <sup>3</sup> $J_{4,5}$  = 9.3 Hz, 1H, H-4<sub>Glc</sub>), 5.38 (dd, <sup>3</sup> $J_{2,3}$  = 9.8 Hz, <sup>3</sup> $J_{1,2}$  = 7.8 Hz, 1H, H-2<sub>Glc'</sub>), 5.31 (t, <sup>3</sup> $J_{3,4}$  = <sup>3</sup> $J_{4,5}$  = 9.7 Hz, 1H, H-4<sub>Glc'</sub>), 5.27 (t, <sup>3</sup> $J_{1,2}$  = <sup>3</sup> $J_{2,3}$  = 8.9 Hz, 1H, H-2<sub>Glc</sub>), 4.97 (d, <sup>3</sup> $J_{1,2}$  = 7.8 Hz, 1H, H-1<sub>Glc'</sub>), 4.60 (d, <sup>3</sup> $J_{1,2}$  = 8.7 Hz, 1H, H-1<sub>Glc</sub>), 4.41 (t, <sup>3</sup> $J_{2,3}$  = <sup>3</sup> $J_{3,4}$  = 9.0 Hz, 1H, H-3<sub>Glc</sub>), 4.32 – 4.21 (m, 2H, H-6a<sub>Glc</sub>, H-6b<sub>Glc</sub>), 4.12 – 4.03 (m, 2H, H-6a<sub>Glc'</sub>, H-6b<sub>Glc'</sub>), 4.02 – 3.96 (m, 2H, H-5<sub>Glc</sub>, H-5<sub>Glc'</sub>), 2.05 (s, 3H, OAc) ppm.

**<sup>13</sup>C NMR** (151 MHz, CDCl<sub>3</sub>, 298 K)  $\delta$  = 170.8 (C(O)CH<sub>3</sub>), 166.0 (PhC=O), 165.8 (PhC=O), 165.2 (PhC=O), 165.1 (PhC=O), 164.9 (PhC=O), 164.4 (PhC=O), 133.8 (OBz<sub>para</sub>), 133.7 (OBz<sub>para</sub>), 133.5 (OBz<sub>para</sub>), 133.3 (2 OBz<sub>para</sub>), 133.0 (OBz<sub>para</sub>), 130.0 (OBz), 129.9 (OBz), 129.8 (OBz), 129.7 (OBz), 129.6 (OBz), 129.4 (OBz), 129.1 (OBz), 128.8 (OBz), 128.8 (OBz), 128.7 (OBz), 128.7 (OBz), 128.6 (OBz), 128.5 (OBz), 128.5 (OBz), 128.4 (OBz), 128.3 (OBz), 101.2 (C-1<sub>Glc'</sub>), 88.0 (C-1<sub>Glc</sub>), 78.5 (C-3<sub>Glc</sub>), 74.4 (C-5<sub>Glc/Glc'</sub>), 72.9 (C-3<sub>Glc'</sub>), 72.7 (C-2<sub>Glc</sub>), 72.1 (C-5<sub>Glc/Glc'</sub>), 71.9 (C-2<sub>Glc'</sub>), 70.0 (C-4<sub>Glc'</sub>), 69.1 (C-4<sub>Glc</sub>), 63.4 (C-6<sub>Glc'</sub>), 62.6 (C-6<sub>Glc</sub>), 20.9 (CH<sub>3</sub>) ppm.

**ESI-HRMS:**  $m/z$  = 1056.27956 [M+Na]<sup>+</sup> (calculated  $m/z$  = 1056.27977).

### 2.32. 2,3,4,6-Tetra-O-benzoyl- $\beta$ -D-glucopyranosyl-(1 $\rightarrow$ 3)-2,4-di-O-benzoyl- $\beta$ -D-glucopyranosyl azide (**35**)

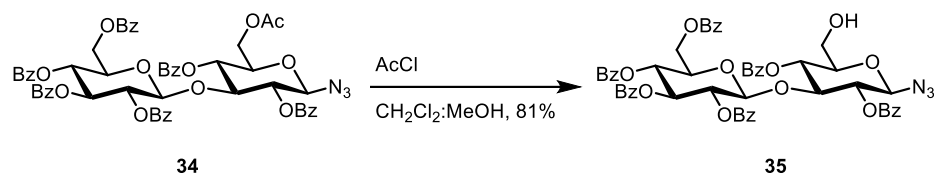

The disaccharide **34** (528 mg, 511  $\mu\text{mol}$ , 1 equiv) was dissolved in a mixture of dichloromethane/methanol (1:1 v/v, 10 mL) and cooled to 0 °C. Acetyl chloride (330  $\mu\text{L}$ , 4.60 mmol, 9 equiv) was added dropwise over a period of 5 min and stirred for 2 h at 0 °C, followed by stirring at room temperature for 16 h. Triethylamine (1 mL) was added and the solvent removed under reduced pressure. The crude was suspended in ethyl acetate (50 mL), filtrated and the filtrate evaporated to dryness under reduced pressure. The filtrate was purified on silica gel via automated flash chromatography (cyclohexane:ethyl acetate, 80:20 $\rightarrow$ 60:40) to yield the product **35** as a colorless foam (413 mg, 416  $\mu\text{mol}$ , 81%).

$R_F$  (cyclohexane:ethyl acetate, 2:1) = 0.18.

$[\alpha]_D^{20} = -65.1$  ( $c = 0.54$  in  $\text{CH}_2\text{Cl}_2$ ).

**IR (ATR):**  $\tilde{\nu} = 2116$  (m), 1732 (s), 1602 (m), 1451 (m), 1259 (s), 1178 (m), 1089 (s), 1067 (s), 1026 (s), 705 (s)  $\text{cm}^{-1}$ .

**$^1\text{H}$  NMR** (500 MHz,  $\text{CDCl}_3$ , 298 K)  $\delta = 8.15 - 7.13$  (m, 30H, 6 OBz), 5.62 (t,  $^3J_{2,3} = ^3J_{3,4} = 9.6$  Hz, 1H, H-3 $_{\text{Glc}}$ ), 5.41 – 5.32 (m, 3H, H-2 $_{\text{Glc}}$ , H-4 $_{\text{Glc}}$ , H-4 $_{\text{Glc'}}$ ), 5.26 (t,  $^3J_{1,2} = ^3J_{2,3} = 9.0$  Hz, 1H, H-2 $_{\text{Glc}}$ ), 5.01 (d,  $^3J_{1,2} = 7.8$  Hz, 1H, H-1 $_{\text{Glc'}}$ ), 4.61 (d,  $^3J_{1,2} = 8.7$  Hz, 1H, H-1 $_{\text{Glc}}$ ), 4.45 (t,  $^3J_{2,3} = ^3J_{3,4} = 9.0$  Hz, 1H, H-3 $_{\text{Glc}}$ ), 4.28 – 4.18 (m, 2H, H-6a $_{\text{Glc'}}$ , H-6b $_{\text{Glc'}}$ ), 4.01 (ddd,  $^3J_{4,5} = 9.5$  Hz,  $^3J_{5,6a} = 5.2$  Hz,  $^3J_{5,6b} = 4.1$  Hz, 1H, H-5 $_{\text{Glc}}$ ), 3.87 – 3.79 (m, 1H, H-6a $_{\text{Glc}}$ ), 3.77 – 3.67 (m, 2H, H-5 $_{\text{Glc}}$ , H-6b $_{\text{Glc}}$ ), 2.46 (dd,  $^3J_{\text{OH},6a} = 8.9$  Hz,  $^3J_{\text{OH},6b} = 4.8$  Hz, 1H, OH) ppm.

**$^{13}\text{C}$  NMR** (126 MHz,  $\text{CDCl}_3$ , 298 K)  $\delta = 166.1$  (Ph $\underline{\text{C}}\text{O}$ ), 165.8 (Ph $\underline{\text{C}}\text{O}$ ), 165.8 (Ph $\underline{\text{C}}\text{O}$ ), 165.2 (Ph $\underline{\text{C}}\text{O}$ ), 165.1 (Ph $\underline{\text{C}}\text{O}$ ), 164.4 (Ph $\underline{\text{C}}\text{O}$ ), 133.9 (OBz $_{\text{para}}$ ), 133.8 (OBz $_{\text{para}}$ ), 133.5 (OBz $_{\text{para}}$ ), 133.4 (OBz $_{\text{para}}$ ), 133.3 (OBz $_{\text{para}}$ ), 133.0 (OBz $_{\text{para}}$ ), 130.0 (OBz), 130.0 (OBz), 129.9 (OBz), 129.8 (OBz), 129.7 (OBz), 129.5 (OBz), 129.1 (OBz), 128.8 (OBz), 128.8 (OBz), 128.7 (OBz), 128.6 (OBz), 128.5 (OBz), 128.5 (OBz), 128.4 (OBz), 128.3 (OBz), 101.1 (C-1 $_{\text{Glc'}}$ ), 88.1 (C-1 $_{\text{Glc}}$ ), 78.2 (C-3 $_{\text{Glc}}$ ), 77.2 (C-5 $_{\text{Glc}}$ ), 72.9 (C-3 $_{\text{Glc'}}$ , C-2 $_{\text{Glc}}$ ), 72.2 (C-5 $_{\text{Glc'}}$ ), 71.9 (C-2 $_{\text{Glc'}}$ ), 70.0 (C-4 $_{\text{Glc'}}$ ), 69.1 (C-4 $_{\text{Glc}}$ ), 63.5 (C-6 $_{\text{Glc'}}$ ), 61.6 (C-6 $_{\text{Glc}}$ ) ppm.

**ESI-HRMS:**  $m/z = 1014.26917$   $[\text{M}+\text{Na}]^+$  (calculated  $m/z = 1014.26920$ ).

**2.33. 2,3,4,6-Tetra-O-benzoyl- $\beta$ -D-glucopyranosyl-(1 $\rightarrow$ 3)-[2,3,4,6-tetra-O-acetyl- $\alpha$ -D-mannopyranosyl-(1 $\rightarrow$ 6)]-2,4-di-O-benzoyl- $\beta$ -D-glucopyranosyl azide (**36**)**

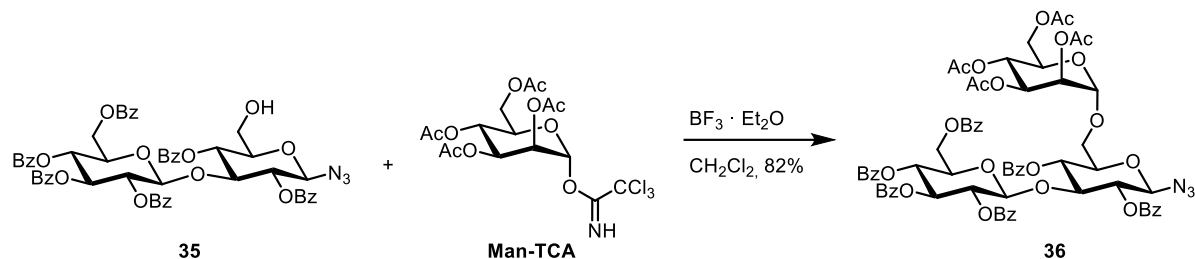

The acceptor disaccharide **35** (341 mg, 344  $\mu$ mol, 1 equiv) and the mannosyl donor Man-TCA (262 mg, 532  $\mu$ mol, 1.55 equiv) were dissolved in dry dichloromethane (15 mL) under nitrogen atmosphere, freshly activated molecular sieve (3 $\text{\AA}$ , ~200 mg) was added and the reaction mixture stirred at room temperature for 15 min. At 0  $^{\circ}\text{C}$  boron trifluoride diethyl etherate (70  $\mu$ L, 552  $\mu$ mol, 1.6 equiv) was added and the reaction mixture was stirred at 0  $^{\circ}\text{C}$  for 2 h, followed by stirring at room temperature for 1 h. The reaction mixture was diluted with dichloromethane (40 mL) and satd. aq.  $\text{NaHCO}_3$  solution (20 mL) and strongly stirred for 30 min. After filtration over celite<sup>®</sup> the phases were separated and the organic phase was washed with water (2 x 30 mL) and brine (30 mL). The combined aq. phases were extracted with ethyl acetate (2 x 30 mL) and the combined organic phases were dried over  $\text{MgSO}_4$ , it was filtrated and the solvent was removed under reduced pressure. The crude product was purified on silica gel via automated flash chromatography (cyclohexane:ethyl acetate, 83:17 $\rightarrow$ 50:50) to yield the product **36** as a colorless foam (371 mg, 281  $\mu$ mol, 82%).

$R_F$  (cyclohexane:ethyl acetate, 1:1) = 0.32.

$[\alpha]_{\text{D}}^{20} = -31.4$  ( $c = 0.57$  in  $\text{CH}_2\text{Cl}_2$ ).

**IR (ATR):**  $\tilde{\nu} = 2117$  (m), 1732 (s), 1602 (m), 1452 (m), 1247 (s), 1178 (m), 1008 (s), 1068 (s), 1026 (s), 750 (m), 707 (s)  $\text{cm}^{-1}$ .

**$^1\text{H}$  NMR** (600 MHz,  $\text{CDCl}_3$ , 298 K)  $\delta = 8.10 - 7.16$  (m, 30, 6 OBz), 5.61 (t,  $^3J_{2,3} = ^3J_{3,4} = 9.6$  Hz, 1H, H-3 $_{\text{Glc}}$ ), 5.39 – 5.20 (m, 7H, H-2 $_{\text{Glc}}$ , H-2 $_{\text{Glc'}}$ , H-2 $_{\text{Man}}$ , H-3 $_{\text{Man}}$ , H-4 $_{\text{Glc}}$ , H-4 $_{\text{Glc'}}$ , H-4 $_{\text{Man}}$ ), 4.97 (d,  $^3J_{1,2} = 7.9$  Hz, 1H, H-1 $_{\text{Glc}}$ ), 4.77 (d,  $^3J_{1,2} = 1.7$  Hz, 1H, H-1 $_{\text{Man}}$ ), 4.67 (d,  $^3J_{1,2} = 8.8$  Hz, 1H, H-1 $_{\text{Glc}}$ ), 4.41 (t,  $^3J_{2,3} = ^3J_{3,4} = 9.0$  Hz, 1H, H-3 $_{\text{Glc}}$ ), 4.24 (dd,  $^2J = 12.3$  Hz,  $^3J_{5,6a} = 5.2$  Hz, 1H, H-6a $_{\text{Glc'}}$ ), 4.15 (dd,  $^2J = 12.0$  Hz,  $^3J_{5,6a} = 3.8$  Hz, 1H, H-6a $_{\text{Man}}$ ), 4.10 – 4.04 (m, 2H, H-5 $_{\text{Glc'}}$ , H-6b $_{\text{Man}}$ ), 4.03 – 3.95 (m, 3H, H-5 $_{\text{Glc}}$ , H-5 $_{\text{Man}}$ , H-6b $_{\text{Glc'}}$ ), 3.88 (dd,  $^2J = 10.8$  Hz,  $^3J_{5,6a} = 7.4$  Hz, 1H, H-6a $_{\text{Glc}}$ ), 3.64 (dd,  $^2J = 10.8$  Hz,  $^3J_{5,6b} = 2.1$  Hz, 1H, H-6b $_{\text{Glc}}$ ), 2.12 (s, 3H, OAc), 2.07 (s, 3H, OAc), 2.01 (s, 3H, OAc), 1.98 (s, 3H, OAc) ppm.

**$^{13}\text{C}$  NMR** (151 MHz,  $\text{CDCl}_3$ , 298 K)  $\delta = 170.8$  ( $\text{C}(\text{O})\text{CH}_3$ ), 170.1 ( $\text{C}(\text{O})\text{CH}_3$ ), 170.0 ( $\text{C}(\text{O})\text{CH}_3$ ), 169.9 ( $\text{C}(\text{O})\text{CH}_3$ ), 166.0 (Ph $\text{C}(\text{O})$ ), 165.8 (Ph $\text{C}(\text{O})$ ), 165.2 (Ph $\text{C}(\text{O})$ ), 165.1 (Ph $\text{C}(\text{O})$ ), 165.1 (Ph $\text{C}(\text{O})$ ), 164.3 (Ph $\text{C}(\text{O})$ ), 133.8 (2 OBz $_{\text{para}}$ ), 133.5 (OBz $_{\text{para}}$ ), 133.4 (OBz $_{\text{para}}$ ), 133.3 (OBz $_{\text{para}}$ ), 133.0 (OBz $_{\text{para}}$ ), 130.0 (OBz), 130.0 (OBz), 129.9 (OBz), 129.8 (OBz), 129.7 (OBz), 129.6 (OBz), 129.2 (OBz), 129.1 (OBz), 128.8 (OBz), 128.8 (OBz), 128.7 (OBz), 128.6 (OBz), 128.5 (OBz), 128.5 (OBz), 128.3 (OBz), 128.2 (OBz), 101.2 (C-1 $_{\text{Glc'}}$ ), 97.2 (C-1 $_{\text{Man}}$ ), 87.8 (C-1 $_{\text{Glc}}$ ), 78.5 (C-3 $_{\text{Glc}}$ ), 75.5 (C-5 $_{\text{Glc}}$ ), 72.9 (C-3 $_{\text{Glc'}}$ ), 72.7\*, 72.1 (C-5 $_{\text{Man}}$ ), 71.9\*, 69.9\*, 69.4\*, 69.4\*, 69.2\*, 68.7 (C-5 $_{\text{Glc'}}$ ), 66.8 (C-6 $_{\text{Glc}}$ ), 66.0\*, 63.4 (C-6 $_{\text{Man}}$ ), 62.3 (C-6 $_{\text{Glc'}}$ ), 21.0 ( $\text{CH}_3$ ), 20.9 ( $\text{CH}_3$ ), 20.8 ( $\text{CH}_3$ ), 20.8 ( $\text{CH}_3$ ) ppm.

\*Assignment is ambiguous due to signal overlap (C-2<sub>Glc</sub>, C-2<sub>Glc'</sub>, C-2<sub>Man</sub>, C-3<sub>Man</sub>, C-4<sub>Glc</sub>, C-4<sub>Glc'</sub>, C-4<sub>Man</sub>.)

**ESI-HRMS:**  $m/z = 1344.36380$   $[M+Na]^+$  (calculated  $m/z = 1344.36429$ ).

**2.34.  $\beta$ -D-Glucopyranosyl-(1 $\rightarrow$ 3)-[ $\alpha$ -D-mannopyranosyl-(1 $\rightarrow$ 6)]- $\beta$ -D-glucopyranosyl azide (**37**)**

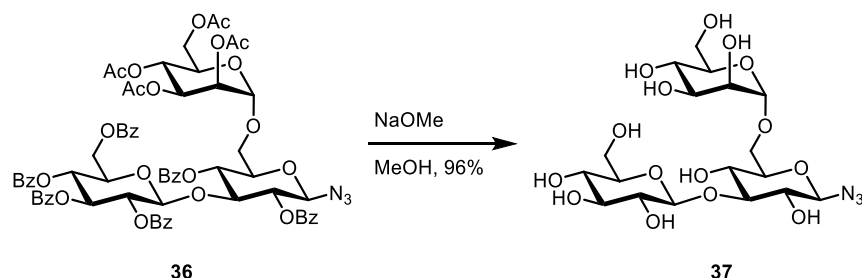

The protected trisaccharide **36** (213 mg, 161  $\mu$ mol, 1 equiv) was suspended in methanol (10 mL) and a solution of sodium methoxide in methanol (50  $\mu$ L, 250  $\mu$ mol, 5 M, 1.55 equiv) was added at room temperature. The reaction mixture was stirred at room temperature for 18 h. It was neutralized by addition of Amberlite®-IRC 120 H<sup>+</sup> resin and stirring for 15 min. The resin was filtered off and the filtrate was concentrated under reduced pressure. The crude was purified on reversed phase silica gel via automated flash chromatography (H<sub>2</sub>O:MeCN, 100:0 1 CV, 100:0  $\rightarrow$  0:100 over 16 CV) and lyophilized to obtain the product **37** as a lyophilizate (82.2 mg, 155  $\mu$ mol, 96%).

$[\alpha]_D^{20} = +13.6$  ( $c = 0.91$  in CH<sub>3</sub>OH).

**IR (ATR):**  $\tilde{\nu} = 3343$  (br, m), 2895 (w), 2118 (m), 1736 (m), 1247 (s), 1067 (s), 1027 (s), 707 (s) cm<sup>-1</sup>.

**<sup>1</sup>H NMR** (600 MHz, D<sub>2</sub>O, 298 K)  $\delta = 4.81$  (d,  $^3J_{1,2} = 1.8$  Hz, 1H, H-1<sub>Man</sub>), 4.73 (d,  $^3J_{1,2} = 8.9$  Hz, 1H, H-1<sub>Glc</sub>), 4.65 (d,  $^3J_{1,2} = 8.0$  Hz, 1H, H-1<sub>Glc'</sub>), 3.93 – 3.88 (m, 2H, H-2<sub>Man</sub>, H-6a<sub>Glc</sub>), 3.86 – 3.76 (m, 2H, H-6a<sub>Glc'</sub>, H-6a<sub>Man</sub>), 3.76 – 3.52 (m, 9H, H-3<sub>Glc</sub>, H-3<sub>Man</sub>, H-4<sub>Glc</sub>, H-4<sub>Man</sub>, H-5<sub>Glc</sub>, H-5<sub>Man</sub>, H-6b<sub>Glc</sub>, H-6b<sub>Glc'</sub>, H-6b<sub>Man</sub>), 3.43 (t,  $^3J_{2,3} = ^3J_{3,4} = 9.2$  Hz, 1H, H-3<sub>Glc'</sub>), 3.42 – 3.35 (m, 2H, H-2<sub>Glc</sub>, H-5<sub>Glc'</sub>), 3.32 (t,  $^3J_{3,4} = ^3J_{4,5} = 9.4$  Hz, 1H, H-4<sub>Glc'</sub>), 3.26 (dd,  $^3J_{2,3} = 9.4$  Hz,  $^3J_{1,2} = 8.0$  Hz, 1H, H-2<sub>Glc'</sub>) ppm.

**<sup>13</sup>C NMR** (151 MHz, D<sub>2</sub>O, 298 K)  $\delta = 102.8$  (C-1<sub>Man</sub>), 99.5 (C-1<sub>Glc</sub>), 90.0 (C-1<sub>Glc'</sub>), 84.2 (C-3<sub>Glc</sub>), 75.9\*, 75.8\*, 75.5 (C-3<sub>Glc'</sub>), 73.4 (C-2<sub>Glc'</sub>), 72.7\*, 72.5\*, 70.5\*, 69.8 (C-2<sub>Man</sub>), 69.5 (C-4<sub>Glc'</sub>), 67.5\*, 66.6\*, 65.0 (C-6<sub>Glc</sub>), 60.8 (C-6<sub>Glc'/Man</sub>), 60.6 (C-6<sub>Glc'/Man</sub>) ppm.

\*Assignment is ambiguous due to signal overlap (C-2<sub>Glc</sub>, C-3<sub>Man</sub>, C-4<sub>Glc</sub>, C-4<sub>Man</sub>, C-5<sub>Glc</sub>, C-5<sub>Glc'</sub>, C-5<sub>Man</sub>)

**ESI-HRMS:**  $m/z = 552.16494$   $[M+Na]^+$  (calculated  $m/z = 552.16474$ ).



**2.35. 2,4-Di-O-benzoyl- $\beta$ -D-mannopyranosyl azide (**39**) and 3,4-di-O-benzoyl- $\beta$ -D-mannopyranosyl azide (**S4**) and 4,6-di-O-benzoyl- $\beta$ -D-mannopyranosyl azide (**S5**)**

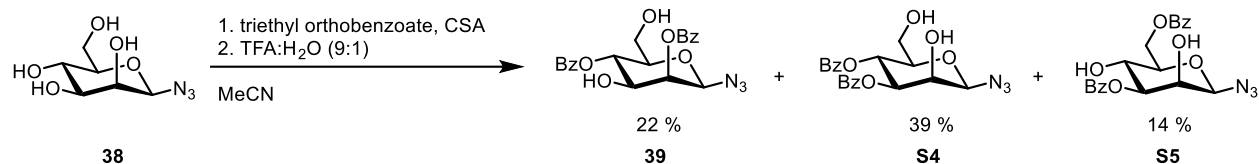

$\beta$ -D-Mannopyranosyl azide (**38**)<sup>[8]</sup> (360 mg, 1.75 mmol, 1 equiv) was suspended in dry acetonitrile (18 mL) under a nitrogen atmosphere and triethyl orthobenzoate (1.8 mL, 8.05 mmol, 4.6 equiv) was added at room temperature. Then, (+)-10-camphorsulfonic acid (76.8 mg, 330  $\mu$ mol, 0.19 equiv) was added and the reaction mixture stirred at room temperature for 5 h. Triethylamine (180  $\mu$ L, 1.30 mmol, 0.74 equiv) was added and the solvent removed under reduced pressure. The crude was dissolved in acetonitrile (18 mL) and while stirring a mixture of trifluoroacetic acid/water (9:1 v/v, 1.13 mL) was added slowly over a period of 5 min at 0 °C. The reaction mixture was kept at 0 °C for further 5 min, then allowed to warm to room temperature over a period of 10 min. Toluene (12 mL) was added and the solvent removed under reduced pressure. The crude was dissolved in dichloromethane (50 mL) and washed with satd. aq.  $\text{NaHCO}_3$  solution (20 mL). The organic phase was dried over  $\text{MgSO}_4$ , filtrated and the solvent was removed under reduced pressure. The crude was purified on silica gel via automated flash chromatography (cyclohexane:ethyl acetate, 9:1 $\rightarrow$ 2:1) to yield the 2,4-di-O-benzoyl- $\beta$ -D-mannopyranosyl azide **39** as a colorless solid (160 mg, 387  $\mu$ mol, 22%), the 3,4-di-O-benzoyl- $\beta$ -D-mannopyranosyl azide **S4** as a colorless solid (282 mg, 682  $\mu$ mol, 39%) and the 3,6-di-O-benzoyl- $\beta$ -D-mannopyranosyl azide **S5** as a colorless solid (101 mg, 245  $\mu$ mol, 14%).

2,4-Di-O-benzoyl- $\beta$ -D-mannopyranosyl azide **39**:

$R_F$  (cyclohexane:ethyl acetate, 2:1) = 0.17.

$[\alpha]_D^{20} = -86.7$  ( $c = 0.96$  in  $\text{CHCl}_3$ ).

**IR (ATR):**  $\tilde{\nu} = 3443$  (br, w), 2927 (w), 2117 (m), 1714 (m), 1602 (w), 1451 (w), 1260 (s), 1094 (s), 1069 (s), 1027 (s), 1001 (m), 707 (s)  $\text{cm}^{-1}$ .

**$^1\text{H}$  NMR** (500 MHz,  $\text{CDCl}_3$ , 298 K)  $\delta = 8.17 - 8.11$  (m, 2H, OBz), 8.07 – 8.01 (m, 2H, OBz), 7.66 – 7.58 (m, 2H, OBz), 7.54 – 7.44 (m, 4H, OBz), 5.72 (dd,  $^3J_{2,3} = 3.4$  Hz,  $^3J_{1,2} = 1.2$  Hz, 1H, H-2), 5.45 (t,  $^3J_{3,4} = ^3J_{4,5} = 9.7$  Hz, 1H, H-4), 4.95 (d,  $^3J_{1,2} = 1.3$  Hz, 1H, H-1), 4.22 – 4.16 (m, 1H, H-3), 3.98 – 3.89 (m, 1H, H-6a), 3.85 – 3.77 (m, 2H, H-5, H-6b), 2.80 (d,  $J = 6.2$ , 1H, OH), 2.42 (s, 1H, OH) ppm.

**$^{13}\text{C}$  NMR** (126 MHz,  $\text{CDCl}_3$ , 298 K)  $\delta = 167.2$  ( $\text{Ph}\text{C=O}$ ), 166.3 ( $\text{Ph}\text{C=O}$ ), 134.1 ( $\text{OBz}_{\text{para}}$ ), 133.9 ( $\text{OBz}_{\text{para}}$ ), 130.3 ( $\text{OBz}_{\text{ortho}}$ ), 130.1 ( $\text{OBz}_{\text{ortho}}$ ), 128.8 ( $\text{OBz}_{\text{meta}}$ ), 128.8 ( $\text{OBz}_{\text{meta}}$ ), 86.1 (C-1), 77.4 (C-5), 72.1 (C-2), 71.8 (C-3), 69.8 (C-4), 61.6 (C-6) ppm.

**ESI-HRMS:**  $m/z = 431.15571$  [ $\text{M} + \text{NH}_4$ ] $^+$  (calculated  $m/z = 431.15613$ ).

3,4-Di-O-benzoyl- $\beta$ -D-mannopyranosyl azide **S4**:

$R_F$  (cyclohexane:ethyl acetate, 2:1) = 0.23.

$[\alpha]_D^{20} = -112.5$  ( $c = 0.23$  in  $\text{CH}_2\text{Cl}_2$ ).

**IR (ATR):**  $\tilde{\nu}$  = 3493 (br, w), 3206 (br, w), 2919 (w), 2114 (m), 1715 (s), 1450 (m), 1316 (m), 1262 (s), 1131 (m), 1111 (s), 1070 (s), 1026 (s), 921 (m)  $\text{cm}^{-1}$ .

**$^1\text{H}$  NMR** (500 MHz,  $\text{CDCl}_3$ , 298 K)  $\delta$  = 8.01 – 7.91 (m, 4H,  $\text{OBz}_{\text{ortho}}$ ), 7.56 – 7.45 (m, 2H,  $\text{OBz}_{\text{para}}$ ), 7.41 – 7.31 (m, 4H,  $\text{OBz}_{\text{meta}}$ ), 5.84 (t,  $^3J_{3,4} = ^3J_{4,5} = 9.7$  Hz, 1H, H-4), 5.43 (dd,  $^3J_{3,4} = 10.1$  Hz,  $^3J_{2,3} = 3.0$  Hz, 1H, H-3), 4.96 (d,  $^3J_{1,2} = 1.1$  Hz, 1H, H-1), 4.35 (dd,  $^3J_{2,3} = 3.1$  Hz,  $^3J_{1,2} = 1.1$  Hz, 1H, H-2), 3.93 – 3.86 (m, 1H, H-6a), 3.81 – 3.74 (m, 2H, H-5, H-6b) ppm.

**$^{13}\text{C}$  NMR** (126 MHz,  $\text{CDCl}_3$ , 298 K)  $\delta$  = 166.2 ( $\text{PhCO}$ ), 165.9 ( $\text{PhCO}$ ), 133.7 ( $\text{OBz}_{\text{para}}$ ), 133.6 ( $\text{OBz}_{\text{para}}$ ), 129.9 ( $\text{OBz}_{\text{ortho}}$ ), 129.8 ( $\text{OBz}_{\text{ortho}}$ ), 128.5 ( $\text{OBz}_{\text{meta}}$ ), 128.5 ( $\text{OBz}_{\text{meta}}$ ), 87.3 (C-1), 77.0 (C-5), 73.6 (C-3), 69.7 (C-2), 66.0 (C-4), 61.3 (C-6) ppm.

**ESI-HRMS:**  $m/z$  = 431.15636 [ $\text{M} + \text{NH}_4$ ] $^+$  (calculated  $m/z$  = 431.15613).

3,6-Di-O-benzoyl- $\beta$ -D-mannopyranosyl azide **S5**:

$R_F$  (cyclohexane:ethyl acetate, 2:1) = 0.35.

$[\alpha]_{\text{D}}^{20}$  = -66.5 ( $c$  = 0.42 in  $\text{CH}_2\text{Cl}_2$ ).

**IR (ATR):**  $\tilde{\nu}$  = 3453 (br, s), 2924 (w), 2118 (s), 1704 (s), 1602 (w), 1452 (m), 1317 (m), 1274 (s), 1117 (m), 1097 (s), 1071 (s), 711 (s)  $\text{cm}^{-1}$ .

**$^1\text{H}$  NMR** (500 MHz,  $\text{CDCl}_3$ , 298 K)  $\delta$  = 8.13 – 8.06 (m, 4H,  $\text{OBz}_{\text{ortho}}$ ), 7.63 – 7.56 (m, 2H,  $\text{OBz}_{\text{para}}$ ), 7.53 – 7.42 (m, 4H,  $\text{OBz}_{\text{meta}}$ ), 5.10 (dd,  $^3J_{3,4} = 9.8$  Hz,  $^3J_{2,3} = 3.0$  Hz, 1H, H-3), 4.92 (d,  $^3J_{1,2} = 1.1$  Hz, 1H, H-1), 4.82 (dd,  $^2J = 12.3$  Hz,  $^3J_{5,6a} = 4.5$  Hz, 1H, H-6a), 4.65 (dd,  $^2J = 12.2$  Hz,  $^3J_{5,6b} = 2.3$  Hz, 1H, H-6b), 4.24 (dd,  $^3J_{2,3} = 3.1$  Hz,  $^3J_{1,2} = 1.1$  Hz, 1H, H-2), 4.19 (t,  $^3J_{3,4} = ^3J_{4,5} = 9.8$  Hz, 1H, H-4), 3.77 (ddd,  $^3J_{4,5} = 9.7$  Hz,  $^3J_{5,6a} = 4.5$  Hz,  $^3J_{5,6b} = 2.3$  Hz, 1H, H-5) ppm.

**$^{13}\text{C}$  NMR** (126 MHz,  $\text{CDCl}_3$ , 298 K)  $\delta$  = 167.4 ( $\text{PhCO}$ ), 166.5 ( $\text{PhCO}$ ), 133.8 ( $\text{OBz}_{\text{para}}$ ), 133.6 ( $\text{OBz}_{\text{para}}$ ), 130.1 (2  $\text{OBz}_{\text{ortho}}$ ), 128.7 ( $\text{OBz}_{\text{meta}}$ ), 128.6 ( $\text{OBz}_{\text{meta}}$ ), 87.5 (C-1), 77.0 (C-5), 76.0 (C-3), 69.6 (C-2), 64.9 (C-4), 63.6 (C-6) ppm.

**ESI-HRMS:**  $m/z$  = 431.15605 [ $\text{M} + \text{NH}_4$ ] $^+$  (calculated  $m/z$  = 431.15613).

## 2.36. 2,3,4,6-Tetra-O-acetyl- $\alpha$ -D-mannopyranosyl-(1 $\rightarrow$ 3)-[2,3,4,6-tetra-O-acetyl- $\alpha$ -D-mannopyranosyl-(1 $\rightarrow$ 6)]-2,4-di-O-benzoyl- $\beta$ -D-mannopyranosyl azide (**40**)

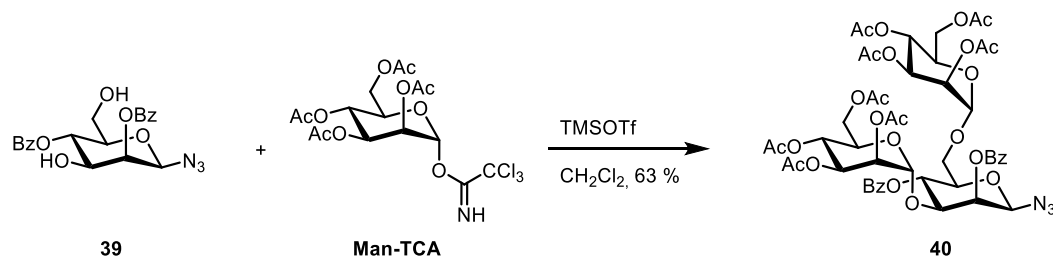

The acceptor mannosyl azide **39** (110 mg, 265  $\mu\text{mol}$ , 1 equiv) and mannosyl donor Man-TCA (225 mg, 457  $\mu\text{mol}$ , 1.73 equiv) were dissolved in dry dichloromethane (4.5 mL) under a nitrogen atmosphere, freshly activated molecular sieve (3Å, ~300 mg) was added and the reaction mixture stirred at room temperature for 15 min. At 0 °C trimethylsilyl trifluoromethanesulfonate (9.6  $\mu\text{L}$ , 53.0  $\mu\text{mol}$ , 0.2 equiv) was added and the reaction mixture was stirred at 0 °C for 1 h. Afterwards,

a solution of mannosyl donor Man-TCA (225 mg, 457  $\mu\text{mol}$ , 1.73 equiv) in dry dichloromethane (4.5 mL) and trimethylsilyl trifluoromethanesulfonate (9.6  $\mu\text{L}$ , 53.0  $\mu\text{mol}$ , 0.2 equiv) were added at 0 °C and stirred for 1 h, followed by stirring at room temperature for 9 h. Triethylamine (200  $\mu\text{L}$ ) was added at room temperature and the reaction mixture was filtrated over celite®. The solvent was removed under reduced pressure and the crude was purified on silica gel via automated flash chromatography (cyclohexane:ethyl acetate, 2:1→1:2) to yield the product **40** as a colorless foam (180 mg, 168  $\mu\text{mol}$ , 63%).

$R_F$  (cyclohexane:ethyl acetate, 1:2) = 0.69.

$[\alpha]_D^{20} = -25.8$  ( $c = 1.01$  in  $\text{CHCl}_3$ ).

**IR (ATR):**  $\tilde{\nu} = 2955$  (w), 2121 (m), 1738 (s), 1732 (s), 1368 (m), 1216 (s), 1139 (m), 1084 (s), 1068 (s), 1041 (s), 896 (m), 711 (s)  $\text{cm}^{-1}$ .

**$^1\text{H}$  NMR** (600 MHz,  $\text{CDCl}_3$ , 298 K)  $\delta = 8.17 - 8.12$  (m, 2H, OBz), 8.01 – 7.97 (m, 2H, OBz), 7.66 – 7.51 (m, 4H, OBz), 7.48 – 7.42 (m, 2H, OBz), 5.74 (dd,  $^3J_{2,3} = 3.3$  Hz,  $^3J_{1,2} = 1.3$  Hz, 1H, H-2<sub>Man</sub>), 5.54 (t,  $^3J_{3,4} = ^3J_{4,5} = 9.7$  Hz, 1H, H-4<sub>Man</sub>), 5.35 (dd,  $^3J_{3,4} = 10.0$  Hz,  $^3J_{2,3} = 3.5$  Hz, 1H, H-3<sub>Man''</sub>), 5.27 (t,  $^3J_{3,4} = ^3J_{4,5} = 10.1$  Hz, 1H, H-4<sub>Man''</sub>), 5.23 (dd,  $^3J_{2,3} = 3.5$  Hz,  $^3J_{1,2} = 1.8$  Hz, 1H, H-2<sub>Man''</sub>), 5.15 (t,  $^3J_{3,4} = ^3J_{4,5} = 9.8$  Hz, 1H, H-4<sub>Man'</sub>), 5.04 (dd,  $^3J_{3,4} = 9.6$  Hz,  $^3J_{2,3} = 3.5$  Hz, 1H, H-3<sub>Man'</sub>), 4.99 (d,  $^3J_{1,2} = 1.3$  Hz, 1H, H-1<sub>Man</sub>), 4.95 (d,  $^3J_{1,2} = 1.9$  Hz, 1H, H-1<sub>Man'</sub>), 4.86 (dd,  $^3J_{2,3} = 3.5$  Hz,  $^3J_{1,2} = 1.9$  Hz, 1H, H-2<sub>Man'</sub>), 4.81 (d,  $^3J_{1,2} = 1.8$  Hz, 1H, H-1<sub>Man''</sub>), 4.29 (dd,  $^2J = 12.3$  Hz,  $^3J_{5,6a} = 4.7$  Hz, 1H, H-6a<sub>Man'</sub>), 4.26 – 4.21 (m, 3H, H-3<sub>Man</sub>, H-5<sub>Man'</sub>, H-6a<sub>Man''</sub>), 4.17 (dd,  $^2J = 12.2$  Hz,  $^3J_{5,6b} = 2.2$  Hz, 1H, H-6b<sub>Man'</sub>), 4.10 (ddd,  $^3J_{4,5} = 10.0$  Hz,  $^3J_{5,6a} = 5.2$  Hz,  $^3J_{5,6b} = 2.3$  Hz, 1H, H-5<sub>Man''</sub>), 4.06 (dd,  $^2J = 12.1$  Hz,  $^3J_{5,6b} = 2.4$  Hz, 1H, H-6b<sub>Man''</sub>), 4.02 – 3.94 (m, 2H, H-5<sub>Man</sub>, H-6a<sub>Man</sub>), 3.69 (dd,  $^2J = 10.3$  Hz,  $^3J_{5,6b} = 1.8$  Hz, 1H, H-6b<sub>Man</sub>), 2.13, 2.13, 2.03, 2.02, 2.01, 1.99, 1.82, 1.81 (each s, each 3H, 8 x OAc) ppm.

**$^{13}\text{C}$  NMR** (151 MHz,  $\text{CDCl}_3$ , 298 K)  $\delta = 170.8$  ( $\underline{\text{C}}(\text{O})\text{CH}_3$ ), 170.7 ( $\underline{\text{C}}(\text{O})\text{CH}_3$ ), 170.1 ( $\underline{\text{C}}(\text{O})\text{CH}_3$ ), 170.0 ( $\underline{\text{C}}(\text{O})\text{CH}_3$ ), 169.9 ( $\underline{\text{C}}(\text{O})\text{CH}_3$ ), 169.9 ( $\underline{\text{C}}(\text{O})\text{CH}_3$ ), 169.2 ( $\underline{\text{C}}(\text{O})\text{CH}_3$ ), 169.1 ( $\underline{\text{C}}(\text{O})\text{CH}_3$ ), 166.0 ( $\text{Ph}\underline{\text{C}}\text{O}$ ), 165.2 ( $\text{Ph}\underline{\text{C}}\text{O}$ ), 133.9 (OBz<sub>para</sub>), 133.9 (OBz<sub>para</sub>), 130.3 (OBz), 130.1 (OBz), 129.0 (OBz), 128.9 (OBz), 128.7 (OBz), 128.5 (OBz), 99.8 (C-1<sub>Man'</sub>), 97.3 (C-1<sub>Man''</sub>), 85.8 (C-1<sub>Man</sub>), 76.7 (C-3<sub>Man</sub>), 75.7 (C-5<sub>Man</sub>), 71.0 (C-2<sub>Man</sub>), 69.7 (C-5<sub>Man'</sub>), 69.4 (C-2<sub>Man''</sub>), 69.2 (C-3<sub>Man''</sub>), 69.2 (C-2<sub>Man'</sub>), 68.7 (C-4<sub>Man/5Man''</sub>), 68.7 (C-4<sub>Man/5Man''</sub>), 68.3 (C-3<sub>Man'</sub>), 66.7 (C-6<sub>Man</sub>), 66.1 (C-4<sub>Man'/Man''</sub>), 66.0 (C-4<sub>Man'/Man''</sub>), 62.5 (C-6<sub>Man'/Man''</sub>), 62.4 (C-6<sub>Man'/Man''</sub>), 21.0 ( $\text{CH}_3$ ), 20.9 ( $\text{CH}_3$ ), 20.9 ( $\text{CH}_3$ ), 20.8 ( $\text{CH}_3$ ), 20.8 (2  $\text{CH}_3$ ), 20.6 ( $\text{CH}_3$ ), 20.5 ( $\text{CH}_3$ ) ppm.

**ESI-HRMS:**  $m/z = 1091.34491$  [ $\text{M}+\text{NH}_4$ ]<sup>+</sup> (calculated  $m/z = 1091.34629$ ).

### 2.37. $\alpha$ -D-Mannopyranosyl-(1 $\rightarrow$ 3)-[ $\alpha$ -D-mannopyranosyl-(1 $\rightarrow$ 6)]- $\beta$ -D-mannopyranosyl azide (**41**)

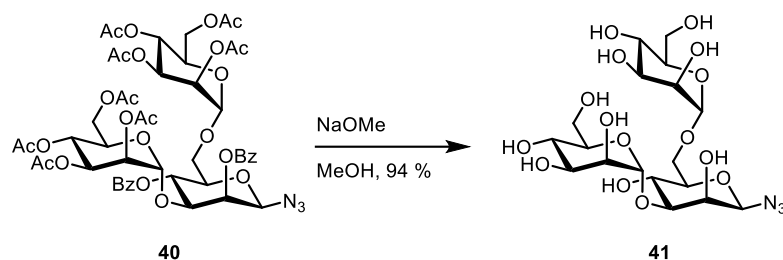

The protected trisaccharide **40** (139 mg, 129  $\mu$ mol, 1 equiv) was suspended in methanol (10 mL) and a solution of sodium methoxide in methanol (50  $\mu$ L, 250  $\mu$ mol, 5 M, 1.9 equiv) was added at room temperature. The reaction mixture was stirred at room temperature for 23 h. It was neutralized by addition of Amberlite®-IRC 120 H<sup>+</sup> resin and stirring for 15 min. The resin was filtered off and the filtrate was concentrated under reduced pressure. The crude was purified on reversed phase silica gel via automated flash chromatography (H<sub>2</sub>O:MeCN, 100:0 1 CV, 100:0  $\rightarrow$  0:100 over 16 CV) and lyophilized to obtain the product **41** as a lyophilizate (64.6 mg, 122  $\mu$ mol, 94%).

$[\alpha]_{\text{D}}^{20} = +23.9$  ( $c = 0.35$  in CH<sub>3</sub>OH).

**IR (ATR):**  $\tilde{\nu} = 3336$  (br, m), 2924 (w), 2119 (m), 1637 (w), 1249 (m), 1134 (m), 1052 (s), 1024 (s), 975 (m), 810 (m) cm<sup>-1</sup>.

**<sup>1</sup>H NMR** (500 MHz, CD<sub>3</sub>OD, 298 K)  $\delta = 5.07$  (d,  $^3J_{1,2} = 1.7$  Hz, 1H, H-1<sub>Man'</sub>), 4.85 (d,  $^3J_{1,2} = 1.9$  Hz, 1H, H-1<sub>Man''</sub>), 4.56 (d,  $^3J_{1,2} = 1.1$  Hz, 1H, H-1<sub>Man</sub>), 4.11 (dd,  $^3J_{2,3} = 3.1$  Hz,  $^3J_{1,2} = 1.1$  Hz, 1H, H-2<sub>Man</sub>), 3.98 – 3.93 (m, 2H, H-2<sub>Man'</sub>, H-6a<sub>Man</sub>), 3.90 – 3.85 (m, 2H, H-2<sub>Man''</sub>, H-6a<sub>Man'/Man''</sub>), 3.84 – 3.62 (m, 10H, H-3<sub>Man'</sub>, H-3<sub>Man''</sub>, H-4<sub>Man</sub>, H-4<sub>Man'/Man''</sub>, H-5<sub>Man'</sub>, H-5<sub>Man''</sub>, H-6b<sub>Man</sub>, H-6a<sub>Man'/Man''</sub>, H-6b<sub>Man'</sub>, H-6b<sub>Man''</sub>), 3.61 – 3.53 (m, 2H, H-3<sub>Man</sub>, H-4<sub>Man'/Man''</sub>), 3.47 (ddd,  $^3J_{4,5} = 9.8$  Hz,  $^3J_{5,6a} = 5.4$  Hz,  $^3J_{5,6b} = 1.8$  Hz, 1H, H-5<sub>Man</sub>) ppm.

**<sup>13</sup>C NMR** (151 MHz, CD<sub>3</sub>OD, 298 K)  $\delta = 103.9$  (C-1<sub>Man'</sub>), 101.6 (C-1<sub>Man''</sub>), 88.3 (C-1<sub>Man</sub>), 82.6 (C-3<sub>Man</sub>), 79.1 (C-5<sub>Man</sub>), 75.1\*, 74.4\*, 72.7 (C-2<sub>Man</sub>), 72.5\*, 72.5\*, 72.0 (C-2<sub>Man'</sub>, C-2<sub>Man''</sub>), 68.9 (C-4<sub>Man'/Man''</sub>), 68.5\*, 67.2 (C-6<sub>Man</sub>), 66.9\*, 63.1 (C-6<sub>Man'/Man''</sub>), 62.8 (C-6<sub>Man'/Man''</sub>) ppm.

\*Assignment is ambiguous due to signal overlap (C-3<sub>Man'</sub>, C-3<sub>Man''</sub>, C-4<sub>Man</sub>, C-4<sub>Man'/Man''</sub>, C-5<sub>Man'</sub>, C-5<sub>Man''</sub>).

**ESI-HRMS:**  $m/z = 547.20836$  [M+NH<sub>4</sub>]<sup>+</sup> (calculated  $m/z = 547.20934$ ).

### 2.38. 2,3,4-Tri-O-acetyl-6-O-benzyl- $\beta$ -D-galactopyranosyl azide (**42**)

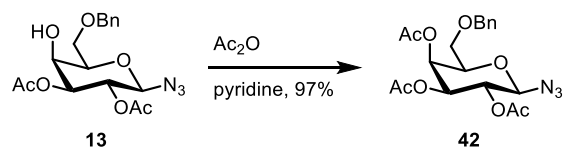

The partially protected galactosyl azide **13** (169 mg, 444  $\mu$ mol, 1 equiv) was dissolved in pyridine (2 mL), acetic anhydride (1 mL, 10.6 mmol, 24 equiv) was added and the reaction mixture was

stirred at room temperature for 20 h. The reaction mixture was diluted with ethyl acetate (50 mL) and washed with aq. 1 M HCl solution (3 x 30 mL), satd. aq. NaHCO<sub>3</sub> solution (30 mL) and brine (20 mL). The separated organic phase was dried over MgSO<sub>4</sub>, filtrated and the solvent was removed under reduced pressure to yield the product **42** as a colorless oil (182 mg, 432 μmol, 97%).

$R_F$  (cyclohexane:ethyl acetate, 2:1) = 0.38.

$[\alpha]_D^{20} = -38.8$  ( $c = 1.00$  in CHCl<sub>3</sub>).

**IR (ATR):**  $\tilde{\nu} = 2871$  (w), 2116 (m), 1746 (s), 1368 (m), 1211 (s), 1086 (m), 1056 (s), 1017 (m), 952 (m), 900 (m), 740 (m), 699 (m) cm<sup>-1</sup>.

**<sup>1</sup>H NMR** (600 MHz, CDCl<sub>3</sub>, 298 K)  $\delta = 7.38 - 7.27$  (m, 5H, Ar-H), 5.49 (dd,  $^3J_{3,4} = 3.4$  Hz,  $^3J_{4,5} = 1.2$  Hz, 1H, H-4), 5.14 (dd,  $^3J_{2,3} = 10.3$  Hz,  $^3J_{1,2} = 8.8$  Hz, 1H, H-2), 5.03 (dd,  $^3J_{2,3} = 10.3$  Hz,  $^3J_{3,4} = 3.4$  Hz, 1H, H-3), 4.59 (d,  $^3J_{1,2} = 8.8$  Hz, 1H, H-1), 4.57 (d,  $^2J = 11.9$  Hz, 1H, PhCHH'), 4.44 (d,  $^2J = 12.0$  Hz, 1H, PhCHH'), 3.99 – 3.92 (m, 1H, H-5), 3.59 (dd,  $^2J = 9.7$  Hz,  $^3J_{5,6a} = 6.1$  Hz, 1H, H-6a), 3.50 (dd,  $^2J = 9.7$  Hz,  $^3J_{5,6b} = 6.6$  Hz, 1H, H-6b), 2.08 (s, 3H, OAc), 2.07 (s, 3H, OAc), 1.98 (s, 3H, OAc) ppm.

**<sup>13</sup>C NMR** (151 MHz, CDCl<sub>3</sub>, 298 K)  $\delta = 170.1$  (C(O)CH<sub>3</sub>), 170.0 (C(O)CH<sub>3</sub>), 169.4 (C(O)CH<sub>3</sub>), 137.3 (OBn<sub>ipso</sub>), 128.5 (2 Ar-CH), 128.0 (3 Ar-CH), 88.3 (C-1), 74.3 (C-5), 73.6 (PhCH<sub>2</sub>), 70.9 (C-3), 68.3 (C-2), 67.3 (C-4/C-6), 67.2 (C-4/C-6), 20.7 (CH<sub>3</sub>), 20.6 (CH<sub>3</sub>), 20.6 (CH<sub>3</sub>) ppm.

**ESI-HRMS:**  $m/z = 439.18197$  [M+NH<sub>4</sub>]<sup>+</sup> (calculated  $m/z = 439.18234$ ).

### 2.39. 2,3,4-Tri-O-acetyl-β-D-galactopyranosyl azide (**43**)

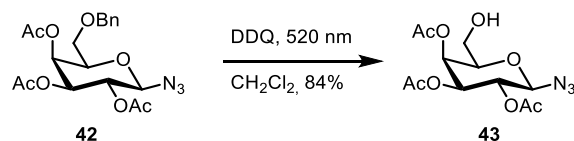

Following the procedure from Cavedon<sup>[4]</sup> et al., the disaccharide **42** (166 mg, 394 μmol, 1 equiv) and 2,3-dichloro-5,6-dicyano-1,4-benzoquinone (134 mg, 591 μmol, 1.5 equiv) were dissolved in dry dichloromethane (20 mL) under nitrogen atmosphere and water (200 μL) was added. During strong stirring the reaction mixture was irradiated with 520 nm green light for 4 h at room temperature. The reaction mixture was diluted with dichloromethane (125 mL) and washed with satd. aq. NaHCO<sub>3</sub> solution (100 mL). The aq. phase was extracted with dichloromethane (2x50 mL). All organic phases were combined and dried over MgSO<sub>4</sub>, filtrated and the solvent was removed under reduced pressure. The crude was purified on silica gel via automated flash chromatography (cyclohexane:ethyl acetate, 66:33→40:60) to yield the product **43** as a colorless oil (110 mg, 332 μmol, 84%).

$R_F$  (cyclohexane:ethyl acetate, 1:1) = 0.13.

$[\alpha]_D^{20} = -5.7$  ( $c = 0.65$  in CHCl<sub>3</sub>).

**IR (ATR):**  $\tilde{\nu} = 3495$  (w), 2118 (m), 1742 (s), 1369 (m), 1245 (s), 1217 (s), 1162 (w), 1112 (m), 1085 (m), 1047 (s), 954 (m) cm<sup>-1</sup>.

**<sup>1</sup>H NMR** (600 MHz, CDCl<sub>3</sub>, 298 K) δ = 5.41 (dd, <sup>3</sup>J<sub>3,4</sub> = 3.4 Hz, <sup>3</sup>J<sub>4,5</sub> = 1.0 Hz, 1H, H-4), 5.20 (dd, <sup>3</sup>J<sub>2,3</sub> = 10.4 Hz, <sup>3</sup>J<sub>1,2</sub> = 8.8 Hz, 1H, H-2), 5.07 (dd, <sup>3</sup>J<sub>2,3</sub> = 10.3 Hz, <sup>3</sup>J<sub>3,4</sub> = 3.4 Hz, 1H, H-3), 4.62 (d, <sup>3</sup>J<sub>1,2</sub> = 8.8 Hz, 1H, H-1), 3.85 (ddd, <sup>3</sup>J<sub>5,6b</sub> = 7.2 Hz, <sup>3</sup>J<sub>5,6a</sub> = 6.3 Hz, <sup>3</sup>J<sub>4,5</sub> = 1.1 Hz, 1H, H-5), 3.78 (dt, <sup>2</sup>J = 11.7 Hz, <sup>3</sup>J<sub>5,6a</sub> = <sup>3</sup>J<sub>OH,6a</sub> = 6.6 Hz, 1H, H-6a), 3.55 (ddd, <sup>2</sup>J = 11.7 Hz, <sup>3</sup>J<sub>5,6b</sub> = 7.3 Hz, <sup>3</sup>J<sub>OH,6b</sub> = 6.2 Hz, 1H, H-6b), 2.20 (s, 3H, OAc), 2.19 – 2.16 (m, 1H, OH), 2.10 (s, 3H, OAc), 2.01 (s, 3H, OAc) ppm.

**<sup>13</sup>C NMR** (151 MHz, CDCl<sub>3</sub>, 298 K) δ = 171.2 (C(O)CH<sub>3</sub>), 170.1 (C(O)CH<sub>3</sub>), 169.6 (C(O)CH<sub>3</sub>), 88.6 (C-1), 75.9 (C-5), 70.9 (C-3), 68.6 (C-2), 67.8 (C-4), 60.7 (C-6), 20.8 (CH<sub>3</sub>), 20.7 (CH<sub>3</sub>) ppm.

**ESI-HRMS:** *m/z* = 349.13514 [M+NH<sub>4</sub>]<sup>+</sup> (calculated *m/z* = 349.13539).

#### 2.40. 2,3,4,6-Tetra-O-acetyl-α-D-mannopyranosyl-(1→6)-2,3,4-tri-O-acetyl-β-D-galactopyranosyl azide (**44**)

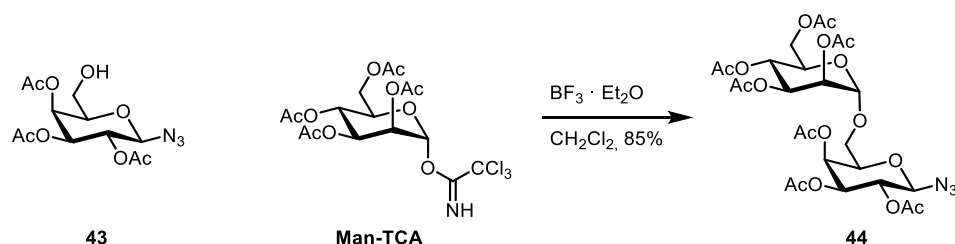

The acceptor galactosyl azide **43** (44 mg, 133 μmol, 1 equiv) and the mannosyl donor Man-TCA (79 mg, 159 μmol, 1.2 equiv) were dissolved in dry dichloromethane (530 μL) under nitrogen atmosphere, freshly activated molecular sieve (3Å, ~40 mg) was added and the reaction mixture stirred at room temperature for 20 min. At 0 °C boron trifluoride diethyl etherate (5 μL, 39.5 μmol, 0.3 equiv) was added and the reaction mixture was stirred at 0 °C for 2 h, followed by stirring at room temperature for 20 h. The reaction mixture was diluted with dichloromethane (10 mL) and triethylamine (50 μL) was added at room temperature. After filtration over celite® the solvent was removed under reduced pressure. The crude product was purified on silica gel via automated flash chromatography (cyclohexane:ethyl acetate, 80:20→45:55) to yield the product **44** as a colorless solid (75 mg, 113 μmol, 85%).

*R<sub>F</sub>* (cyclohexane:ethyl acetate, 1:2) = 0.76.

[α]<sub>D</sub><sup>20</sup> = +28.0 (*c* = 0.48 in CHCl<sub>3</sub>).

**IR (ATR):**  $\tilde{\nu}$  = 2935 (w), 2122 (m), 1748 (s), 1366 (m), 1217 (s), 1134 (m), 1077 (m), 1054 (s), 1045 (s), 973 (m), 907 (m) cm<sup>-1</sup>.

**<sup>1</sup>H NMR** (600 MHz, CDCl<sub>3</sub>, 298 K) δ = 5.43 (dd, <sup>3</sup>J<sub>3,4</sub> = 3.3 Hz, <sup>3</sup>J<sub>4,5</sub> = 1.0 Hz, 1H, H-4<sub>Gal</sub>), 5.34 – 5.26 (m, 2H, H-3<sub>Man</sub>, H-4<sub>Man</sub>), 5.21 (dd, <sup>3</sup>J<sub>2,3</sub> = 3.3 Hz, <sup>3</sup>J<sub>1,2</sub> = 1.8 Hz, 1H, H-2), 5.14 (dd, <sup>3</sup>J<sub>2,3</sub> = 10.4 Hz, <sup>3</sup>J<sub>1,2</sub> = 8.7 Hz, 1H, H-2<sub>Gal</sub>), 5.06 (dd, <sup>3</sup>J<sub>2,3</sub> = 10.4 Hz, <sup>3</sup>J<sub>3,4</sub> = 3.4 Hz, 1H, H-3<sub>Gal</sub>), 4.77 (d, <sup>3</sup>J<sub>1,2</sub> = 1.8 Hz, 1H, H-1<sub>Man</sub>), 4.70 (d, <sup>3</sup>J<sub>1,2</sub> = 8.7 Hz, 1H, H-1<sub>Gal</sub>), 4.28 (dd, <sup>2</sup>J = 12.3 Hz, <sup>3</sup>J<sub>5,6a</sub> = 5.1 Hz, 1H, H-6a<sub>Man</sub>), 4.16 (dd, <sup>2</sup>J = 12.3 Hz, <sup>3</sup>J<sub>5,6b</sub> = 2.4 Hz, 1H, H-6b<sub>Man</sub>), 4.07 (ddd, <sup>3</sup>J<sub>4,5</sub> = 9.5 Hz, <sup>3</sup>J<sub>5,6a</sub> = 5.1 Hz, <sup>3</sup>J<sub>5,6b</sub> = 2.4 Hz, 1H, H-5<sub>Man</sub>), 4.01 (ddd, <sup>3</sup>J<sub>5,6a</sub> = 7.3 Hz, <sup>3</sup>J<sub>5,6b</sub> = 4.3 Hz, <sup>3</sup>J<sub>4,5</sub> = 1.2 Hz, 1H, H-5<sub>Gal</sub>), 3.84 (dd, <sup>2</sup>J = 10.4 Hz, <sup>3</sup>J<sub>5,6a</sub> = 7.3 Hz, 1H, H-6a<sub>Gal</sub>), 3.54 (dd, <sup>2</sup>J = 10.4 Hz, <sup>3</sup>J<sub>5,6b</sub> = 4.2 Hz, 1H, H-6b<sub>Gal</sub>), 2.17 (s, 3H, OAc), 2.15 (s, 3H, OAc), 2.12 (s, 3H, OAc), 2.10 (s, 3H, OAc), 2.03 (s, 3H, OAc), 2.00 (s, 3H, OAc), 1.99 (s, 3H, OAc) ppm.

**$^{13}\text{C}$  NMR** (151 MHz,  $\text{CDCl}_3$ , 298 K)  $\delta$  = 170.7 ( $\text{C}(\text{O})\text{CH}_3$ ), 170.2 ( $\text{C}(\text{O})\text{CH}_3$ ), 170.1 ( $\text{C}(\text{O})\text{CH}_3$ ), 170.0 ( $\text{C}(\text{O})\text{CH}_3$ ), 170.0 ( $\text{C}(\text{O})\text{CH}_3$ ), 169.9 ( $\text{C}(\text{O})\text{CH}_3$ ), 169.6 ( $\text{C}(\text{O})\text{CH}_3$ ), 97.6 (C-1<sub>Man</sub>), 88.3 (C-1<sub>Gal</sub>), 74.2 (C-5<sub>Gal</sub>), 70.8 (C-3<sub>Gal</sub>), 69.4 (C-2<sub>Man</sub>), 69.0 (C-3<sub>Man</sub>/C-5<sub>Man</sub>), 69.0 (C-3<sub>Man</sub>/C-5<sub>Man</sub>), 68.3 (C-2<sub>Gal</sub>), 67.7 (C-4<sub>Gal</sub>), 66.4 (C-6<sub>Gal</sub>), 66.0 (C-4<sub>Man</sub>), 62.4 (C-6<sub>Man</sub>), 21.0 ( $\text{CH}_3$ ), 20.9 ( $\text{CH}_3$ ), 20.9 ( $\text{CH}_3$ ), 20.8 ( $\text{CH}_3$ ), 20.8 ( $\text{CH}_3$ ), 20.7 ( $\text{CH}_3$ ), 20.7 ( $\text{CH}_3$ ) ppm.

**ESI-HRMS:**  $m/z$  = 679.22971 [ $\text{M}+\text{NH}_4$ ] $^+$  (calculated  $m/z$  = 679.23047).

#### 2.41. $\alpha$ -D-Mannopyranosyl-(1 $\rightarrow$ 6)- $\beta$ -D-galactopyranosyl azide (**45**)

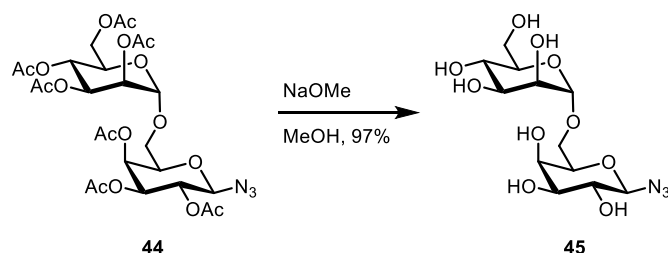

The protected disaccharide **44** (68 mg, 103  $\mu\text{mol}$ , 1 equiv) was suspended in methanol (6 mL) and a solution of sodium methoxide in methanol (30  $\mu\text{L}$ , 150  $\mu\text{mol}$ , 5 M, 1.5 equiv) was added at room temperature. The reaction mixture was stirred at room temperature for 19 h. It was neutralized by addition of Amberlite<sup>®</sup>-IRC 120 H $^+$  resin and stirring for 20 min. The resin was filtered off and the filtrate was concentrated under reduced pressure. The crude was purified on reversed phase silica gel via automated flash chromatography ( $\text{H}_2\text{O}:\text{MeCN}$ , 100:0 1 CV, 100:0  $\rightarrow$  0:100 over 16 CV) and lyophilized to obtain the product **45** as a lyophilizate (36 mg, 99.1  $\mu\text{mol}$ , 97%).

$[\alpha]_{\text{D}}^{20}$  = +47.3 ( $c$  = 0.41 in  $\text{CH}_3\text{OH}$ ).

**IR (ATR):**  $\tilde{\nu}$  = 3327 (br, m), 2926 (w), 2118 (m), 1639 (w), 1408 (w), 1368 (m), 1245 (m), 1134 (m), 1047 (s), 1024 (s), 972 (m), 810 (m)  $\text{cm}^{-1}$ .

**$^1\text{H}$  NMR** (600 MHz,  $\text{D}_2\text{O}$ , 298 K)  $\delta$  = 4.91 (d,  $^3J_{1,2}$  = 1.8 Hz, 1H, H-1<sub>Man</sub>), 4.67 (d,  $^3J_{1,2}$  = 8.7 Hz, 1H, H-1<sub>Gal</sub>), 4.00 – 3.88 (m, 5H, H-2<sub>Man</sub>, H-4<sub>Gal</sub>, H-5<sub>Gal</sub>, H-6a<sub>Gal</sub>, H-6a<sub>Man</sub>), 3.84 – 3.63 (m, 6H, H-3<sub>Gal</sub>, H-3<sub>Man</sub>, H-4<sub>Man</sub>, H-5<sub>Man</sub>, H-6b<sub>Gal</sub>, H-6b<sub>Man</sub>), 3.54 – 3.50 (m, 1H, H-2<sub>Gal</sub>) ppm.

**$^{13}\text{C}$  NMR** (151 MHz,  $\text{D}_2\text{O}$ , 298 K)  $\delta$  = 99.7 (C-1<sub>Man</sub>), 90.5 (C-1<sub>Gal</sub>), 74.9, 72.8, 72.6, 70.4, 70.2 (C-2<sub>Gal</sub>), 69.9, 68.6, 66.7, 66.2 (C-6<sub>Gal</sub>), 60.8 (C-6<sub>Man</sub>) ppm.

**ESI-HRMS:**  $m/z$  = 385.15637 [ $\text{M}+\text{NH}_4$ ] $^+$  (calculated  $m/z$  = 385.15652).

#### 2.42. $\alpha$ -D-Mannopyranosyl-(1 $\rightarrow$ 4)- $\beta$ -D-glucopyranosyl azide (**S6**)

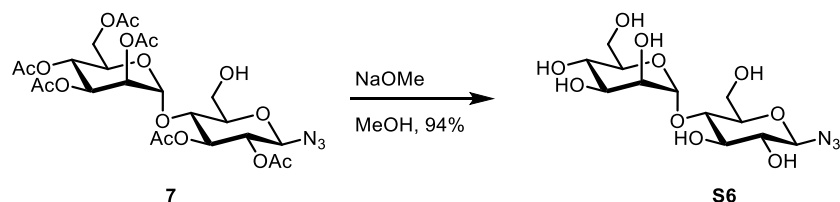

The protected disaccharide **7** (30 mg, 48.4  $\mu\text{mol}$ , 1 equiv) was suspended in methanol (4 mL) and a solution of sodium methoxide in methanol (20  $\mu\text{L}$ , 100  $\mu\text{mol}$ , 5 M, 2 equiv) was added at room temperature. The reaction mixture was stirred at room temperature for 18 h. It was neutralized by

addition of Amberlite®-IRC 120 H<sup>+</sup> resin and stirring for 15 min. The resin was filtered off and the filtrate was concentrated under reduced pressure. The crude was purified on reversed phase silica gel via automated flash chromatography (H<sub>2</sub>O:MeCN, 100:0 1 CV, 100:0 → 0:100 over 16 CV) and lyophilized to obtain the product **S6** as a lyophilizate (16.8 mg, 45.7 μmol, 94%).

$[\alpha]_{\text{D}}^{20} = +45.4$  ( $c = 0.16$  in CH<sub>3</sub>OH).

**IR (ATR):**  $\tilde{\nu} = 3324$  (br, m), 2929 (w), 2119 (m), 1248 (m), 1130 (m), 1026 (s), 968 (m), 812 (m) cm<sup>-1</sup>.

**<sup>1</sup>H NMR** (500 MHz, D<sub>2</sub>O, 298 K)  $\delta = 5.27$  (d,  $^3J_{1,2} = 1.9$  Hz, 1H, H-1<sub>Man</sub>), 4.71 (d,  $^3J_{1,2} = 8.8$  Hz, 1H, H-1<sub>Glc</sub>), 4.04 (dd,  $^3J_{2,3} = 3.3$  Hz,  $^3J_{1,2} = 1.9$  Hz, 1H, H-2<sub>Man</sub>), 3.96 – 3.84 (m, 2H, H-6a<sub>Glc</sub>, H-6a<sub>Man</sub>), 3.82 – 3.57 (m, 8H, H-3<sub>Glc</sub>, H-3<sub>Man</sub>, H-4<sub>Glc</sub>, H-4<sub>Man</sub>, H-5<sub>Glc</sub>, H-5<sub>Man</sub>, H-6b<sub>Glc</sub>, H-6b<sub>Man</sub>), 3.26 (t,  $^3J_{1,2} = ^3J_{2,3} = 8.8$  Hz, 1H, H-2<sub>Glc</sub>) ppm.

**<sup>13</sup>C NMR** (126 MHz, D<sub>2</sub>O, 298 K)  $\delta = 104.2$  (C-1<sub>Man</sub>), 92.7 (C-1<sub>Glc</sub>), 79.3\*, 79.0\*, 78.5\*, 76.5\*, 75.7 (C-2<sub>Glc</sub>), 73.1\*, 73.0 (C-2<sub>Man</sub>), 69.3\*, 63.7 (C-6<sub>Glc/Man</sub>), 63.4 (C-6<sub>Glc/Man</sub>) ppm.

\*Assignment is ambiguous due to signal overlap (C-3<sub>Glc</sub>, C-3<sub>Man</sub>, C-4<sub>Glc</sub>, C-4<sub>Man</sub>, C-5<sub>Glc</sub>, C-5<sub>Man</sub>).

**ESI-HRMS:**  $m/z = 385.15609$  [M+NH<sub>4</sub>]<sup>+</sup> (calculated  $m/z = 385.15652$ ).

## 2.43. α-D-Mannopyranosyl-(1→4)-β-D-galactopyranosyl azide (**S7**)

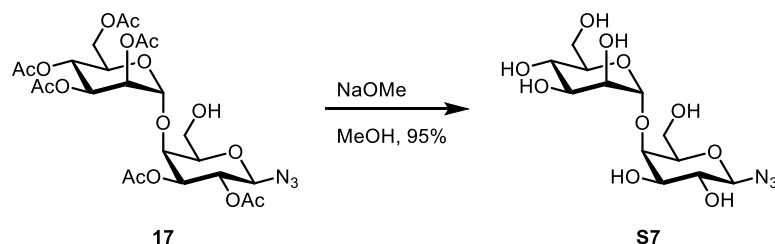

The protected disaccharide **17** (91.1 mg, 147 μmol, 1 equiv) was suspended in methanol (6 mL) and a solution of sodium methoxide in methanol (30 μL, 150 μmol, 5 M, 1 equiv) was added at room temperature. The reaction mixture was stirred at room temperature for 18 h. It was neutralized by addition of Amberlite®-IRC 120 H<sup>+</sup> resin and stirring for 15 min. The resin was filtered off and the filtrate was concentrated under reduced pressure. The crude was purified on reversed phase silica gel via automated flash chromatography (H<sub>2</sub>O:MeCN, 100:0 1 CV, 100:0 → 0:100 over 16 CV) and lyophilized to obtain the product **S7** as a lyophilizate (51.3 mg, 140 μmol, 95%).

$[\alpha]_{\text{D}}^{20} = +30.9$  ( $c = 0.53$  in CH<sub>3</sub>OH).

**IR (ATR):**  $\tilde{\nu} = 3342$  (br, m), 2930 (w), 2117 (m), 1248 (m), 1091 (s), 1044 (s), 976 (m), 679 (m) cm<sup>-1</sup>.

**<sup>1</sup>H NMR** (500 MHz, D<sub>2</sub>O, 298 K)  $\delta = 4.85$  (d,  $^3J_{1,2} = 1.9$  Hz, 1H, H-1<sub>Man</sub>), 4.76 (d,  $^3J_{1,2} = 8.6$  Hz, 1H, H-1<sub>Gal</sub>), 4.07 (d,  $^3J_{3,4} = 3.2$  Hz, 1H, H-4<sub>Gal</sub>), 4.04 – 3.99 (m, 2H, H-2<sub>Man</sub>, H-5<sub>Gal/Man</sub>), 3.88 – 3.67 (m, 8H, H-3<sub>Gal</sub>, H-3<sub>Man</sub>, H-4<sub>Man</sub>, H-5<sub>Gal/Man</sub>, H-6a<sub>Gal</sub>, H-6a<sub>Man</sub>, H-6b<sub>Gal</sub>, H-6b<sub>Man</sub>), 3.48 (dd,  $^3J_{2,3} = 10.1$  Hz,  $^3J_{1,2} = 8.6$  Hz, 1H, H-2<sub>Gal</sub>) ppm.



**$^{13}\text{C}$  NMR** (126 MHz,  $\text{D}_2\text{O}$ , 298 K)  $\delta$  = 104.4 (C-1<sub>Man</sub>), 93.7 (C-1<sub>Gal</sub>), 80.0 (C-4<sub>Gal</sub>), 79.8, 75.9 (C-5<sub>Gal/Man</sub>), 74.9, 73.2 (C-2<sub>Gal</sub>), 73.1, 72.9 (C-2<sub>Man</sub>), 69.2, 63.4 (C-6<sub>Gal/Man</sub>), 63.1 (C-6<sub>Gal/Man</sub>) ppm.

\*Assignment is ambiguous due to signal overlap (C-3<sub>Gal</sub>, C-3<sub>Man</sub>, C-4<sub>Man</sub>, C-5<sub>Gal/Man</sub>).

**ESI-HRMS:**  $m/z$  = 385.15586  $[\text{M}+\text{NH}_4]^+$  (calculated  $m/z$  = 385.15652).

#### 2.44. 2,3,4,6-Tetra-*O*-benzoyl- $\alpha$ -D-glucopyranosyl-(1 $\rightarrow$ 4)-2,3-di-*O*-benzoyl-1,6-anhydro- $\beta$ -D-glucopyranose (**S9**)

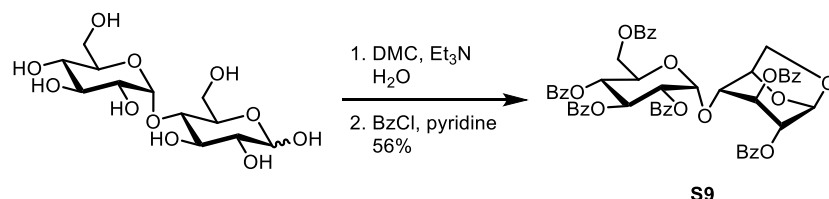

Maltose monohydrate (1.06 g, 2.94 mmol, 1 equiv) was dissolved in water (5 mL) and cooled to 0 °C. To the stirred solution triethylamine (3.7 mL, 26.4 mmol, 9 equiv) was added, followed by addition of 2-chloro-1,3-dimethylimidazolinium chloride (DMC, 1.49 g, 8.81 mmol, 3 equiv) and stirred at 0 °C for 1.5 h. The reaction mixture was diluted with water (20 mL) and washed with dichloromethane (3 x 25 mL). The aq. phase was concentrated to dryness and codistilled with toluene (3 x 25 mL). The crude was dissolved in pyridine (15 mL) and cooled to 0 °C. To the stirred solution benzoyl chloride (2.15 mL, 18.4 mmol, 6.3 equiv) was added and stirred for 1 h at 0 °C, then 18 h at room temperature. Methanol (10 mL) was added to the reaction mixture and stirred for 15 min at room temperature. Then, the mixture was diluted with ethyl acetate (100 mL) and washed with aq. 1 M HCl solution (3 x 25 mL), satd. aq.  $\text{NaHCO}_3$  solution (50 mL) and brine (20 mL). The organic phase was dried over  $\text{MgSO}_4$ , filtrated and the solvent was removed under reduced pressure. The crude was purified on silica gel via automated flash chromatography (cyclohexane:ethyl acetate, 90:10  $\rightarrow$  70:30 over 12 CV) to yield the product **S9** as a colorless foam (1.71 g, 1.80 mmol, 61%).

$R_F$  (cyclohexane:ethyl acetate, 4:1) = 0.34.

$[\alpha]_D^{20}$  = +68.0 ( $c$  = 1.00 in  $\text{CH}_2\text{Cl}_2$ ).

**IR (ATR):**  $\tilde{\nu}$  = 2968 (w), 1720 (s), 1602 (m), 1585 (w), 1492 (w), 1451 (m), 1315 (m), 1251 (s), 1092 (s), 1069 (s), 1025 (s), 705 (s)  $\text{cm}^{-1}$ .

**$^1\text{H}$  NMR** (500 MHz,  $\text{CDCl}_3$ , 298 K)  $\delta$  = 8.36 – 8.30 (m, 2H), 8.12 – 7.85 (m, 10H), 7.64 – 7.26 (m, 17H), 7.15 (dd,  $J$  = 8.4, 7.5 Hz, 2H), 6.42 (t,  $J$  = 10.0 Hz, 1H), 5.78 – 5.70 (m, 2H), 5.67 (d,  $J$  = 3.7 Hz, 1H), 5.44 (dd,  $J$  = 10.3, 3.8 Hz, 1H), 5.21 (t,  $J$  = 1.5 Hz, 1H), 5.03 (d,  $J$  = 1.2 Hz, 1H), 4.99 (d,  $J$  = 5.7 Hz, 1H), 4.94 (ddd,  $J$  = 10.3, 5.8, 2.6 Hz, 1H), 4.62 (dd,  $J$  = 12.3, 2.6 Hz, 1H), 4.52 (dd,  $J$  = 12.3, 5.9 Hz, 1H), 4.07 (dd,  $J$  = 7.7, 1.0 Hz, 1H), 3.77 – 3.73 (m, 1H), 3.69 (dd,  $J$  = 7.7, 5.8 Hz, 1H) ppm.

**$^{13}\text{C}$  NMR** (126 MHz,  $\text{CDCl}_3$ , 298 K)  $\delta$  = 166.3, 166.1, 165.8, 165.6, 165.5, 164.7, 133.7, 133.7, 133.6, 133.4, 133.3, 133.3, 130.4, 130.2, 130.0, 129.9, 129.9, 129.8, 129.8, 129.4, 129.3, 129.2, 129.1, 128.8, 128.8, 128.7, 128.6, 128.6, 128.5, 128.5, 128.4, 99.1, 98.6, 77.6, 77.4, 77.2, 76.9, 74.8, 71.7, 71.5, 70.4, 69.5, 69.0, 69.0, 65.0, 63.2, 60.5, 14.3 ppm.

**ESI-HRMS:**  $m/z = 966.29559$   $[M+NH_4]^+$  (calculated  $m/z = 966.29676$ ).

### 3. Biological Testing

#### Equipment

Test tubes for bacterial cultivation were sterilized in an autoclave before usage. The optical density of the bacterial suspension was measured on a Jenway Spectrophotometer Model 7305. Washing of black 96 well plates was performed on a HyroFlex microplate washer. Fluorescent readout of black 96 well plates was performed on an Infinite M Nano+ plate reader.

#### Buffer and Bacteria

Following buffers and media were prepared with type 1 water from a Purelab® flex 3 system. The solutions were prepared by following procedures:

LB medium: Luria/Miller powder from Roth® (trypton (10.0 g), sodium chloride (10.0 g), yeast extract (5.00 g)) was dissolved in 1 L type 1 water. The solution was autoclaved and afterwards antibiotics (ampicillin (100 mg), chloramphenicol (50.0 mg)) were added.

PBS: 4 PBS tablets (gibco™) were dissolved in 2 L type 1 water (buffer composition: sodium phosphates 10 mM, potassium chloride 2.68 mM, sodium chloride 140 mM).

PBST: Tween®20 (0.05% v/v) was added to PBS.

Carbonate buffer (pH 9.6): sodium carbonate (1.59 g) and sodium hydrogen carbonate (2.52 g) were dissolved in distilled deionized water (1.00 L).

#### Bacteria

The GFP-expressing *E. coli* bacteria strain PKL1162, produced in the laboratory of Per Klemm, was used in the adhesion inhibition assays.<sup>[9]</sup> This *E. coli* strain PKL1162 was constructed by insertion of the plasmid pPKL174 into the strain SAR18<sup>[10]</sup>. The plasmid pPKL174 contains the *fim* gene cluster, which is responsible for the expression of type 1 fimbriae. The strains SAR18 contains the *gfp* gene in its genome, which is controlled by a constitutive promoter. The final combined bacterial strain PKL1162 expresses type 1 fimbriae as the only fimbriae type in addition to green fluorescence protein (GFP), which allows fluorescence read-out.

#### Cultivation of bacteria

GFP-expressing *E. coli* bacteria (strain PKL1162) were cultivated in 20 mL LB medium and incubated overnight at 37 °C and 180 rpm. Afterwards, the mixture was centrifuged at 4 °C and 5000 rpm for 10 min. The bacteria pellet was washed twice with PBS (2 mL) and then resuspended in PBS. Finally, the suspension was adjusted to OD<sub>600</sub> = 0.4.

#### Mannan coating of microtiter plates

The published assay<sup>[9]</sup> was adapted and modified as follows: Black 96-well microtiter plates (Nunc™, Maxisorp®) were incubated with a solution of mannan from *Saccharomyces cerevisiae* (1.2 mg/mL in carbonate buffer, 120 µL/well) and desiccated overnight at 37 °C and 160 rpm. Then the plates were washed with PBST (3 x 400 µL/well) and blocked with polyvinyl alcohol (PVA) (1% in PBS, 120 µL/well) at 37 °C and 160 rpm for 2 h. Afterwards, the microtiter plates were washed with PBST (3 x 400 µL/well).

## Inhibition assay with GFP-PKL1162 *E. coli* bacteria

Inhibitor solutions of the respective glycans in PBS were prepared and serial dilutions (dilution factor 1:2, 10 steps) of each solution were performed on the mannan-coated microtiter plates (50  $\mu$ L/well final volume). Next, the prepared bacterial suspension ( $OD_{600} = 0.4$ , 50  $\mu$ L/well) was added and the microtiter plates were incubated at 37 °C and 100 rpm for 45 min. The plates were washed with PBS (3 x 400  $\mu$ L/well), then the wells were filled with PBS (100  $\mu$ L/well) and the fluorescence intensity (485 nm/535 nm) was determined. On each individual plate the standard inhibitor methyl  $\alpha$ -D-mannopyranoside (MeMan) was tested in parallel as a reference in triplicates and the respective glycans on the same plate in duplicates or triplicates, respectively.

## Inhibition curves of adhesion-inhibition assay with GFP expressing *E. coli* bacteria.

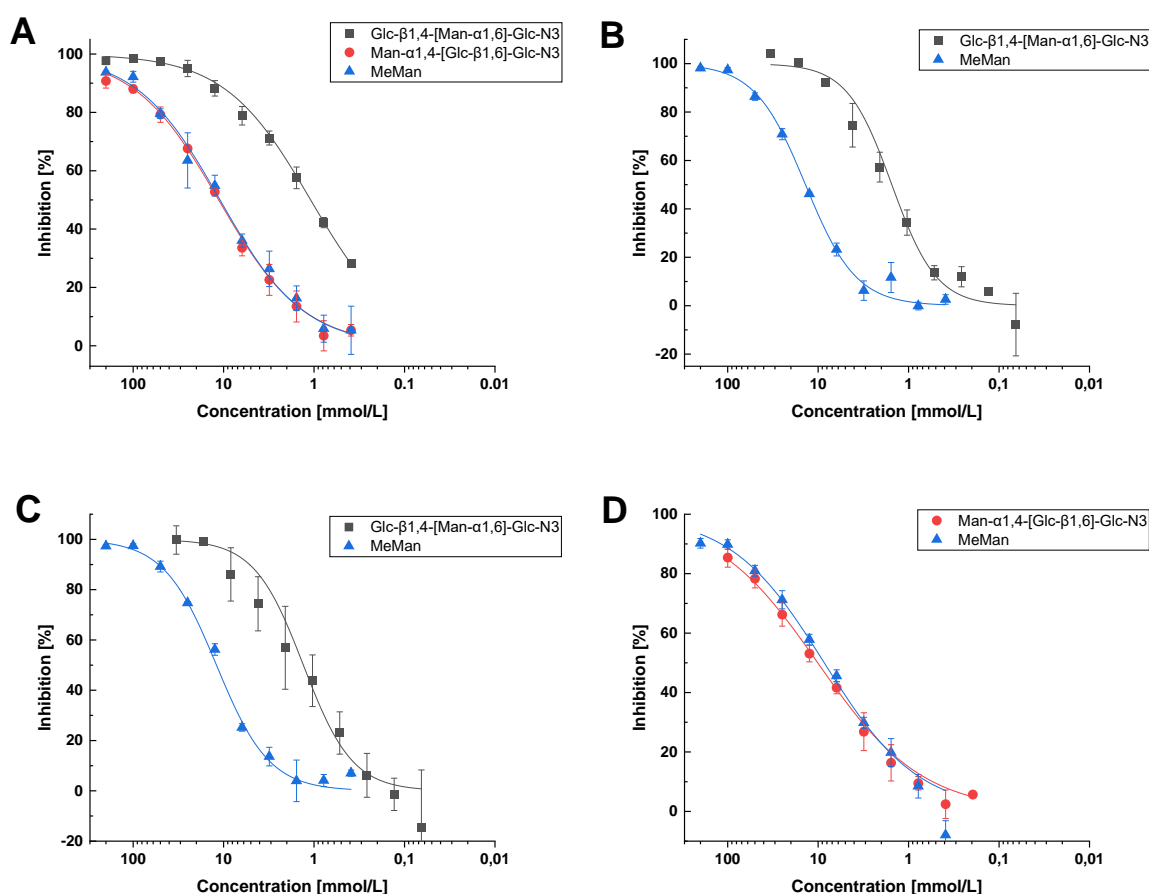

**Figure S2.** Adhesion-inhibition curves of MeMan, Man- $\alpha$ 1,4-[Glc- $\beta$ 1,6]-Glc- $\beta$ N<sub>3</sub> (**11**), Glc- $\beta$ 1,4-[Man- $\alpha$ 1,6]-Glc- $\beta$ N<sub>3</sub> (**10**) as inhibitor of type 1 fimbriae-mediated bacterial adhesion of *E. coli* bacteria (PKL1162) to mannan. As a reference MeMan was tested in parallel on the same plate. Sigmoidal dose-responsive inhibition curves were fitted by non-linear regression. Error bars are standard deviations from duplicate or triplicate results on one plate.

**Table S1** IC<sub>50</sub> values and corresponding RIP values deduced from the inhibition curves obtained with MeMan, Glc-β1,4-[Man-α1,6]-Glc-βN<sub>3</sub> (**10**) and Man-α1,4-[Glc-β1,6]-Glc-βN<sub>3</sub> (**11**) (Figure S2).

| Plate | Entry                                | MeMan         | Glc-β1,4-[Man-α1,6]-Glc-βN <sub>3</sub> ( <b>10</b> ) | Man-α1,4-[Glc-β1,6]-Glc-βN <sub>3</sub> ( <b>11</b> ) |
|-------|--------------------------------------|---------------|-------------------------------------------------------|-------------------------------------------------------|
| A     | IC <sub>50</sub> <sup>a</sup> [mmol] | 10.95 (±0.57) | 1.09 (±0.02)                                          | 11.35 (±0.30)                                         |
|       | RIP <sup>b</sup>                     | 1.00          | 10.04 (±0.75)                                         | 0.97 (±0.08)                                          |
| B     | IC <sub>50</sub> <sup>a</sup> [mmol] | 13.81 (±0.26) | 1.53 (±0.44)                                          | -                                                     |
|       | RIP <sup>b</sup>                     | 1.00          | 9.01 (±2.73)                                          | -                                                     |
| C     | IC <sub>50</sub> <sup>a</sup> [mmol] | 11.99 (±0.66) | 1.31 (±0.15)                                          | -                                                     |
|       | RIP <sup>b</sup>                     | 1.00          | 9.13 (±1.58)                                          | -                                                     |
| D     | IC <sub>50</sub> <sup>a</sup> [mmol] | 8.55 (±0.58)  | -                                                     | 10.10 (±0.60)                                         |
|       | RIP <sup>b</sup>                     | 1.00          | -                                                     | 0.85 (±0.11)                                          |
|       | Mean RIP <sup>c</sup>                | 1.00          | 9.39 (±1.08)                                          | 0.91 (±0.07)                                          |

<sup>a</sup> IC<sub>50</sub> values are average values of duplicate or triplicate results on one plate. The fitting error from non-linear regression is given in brackets.

<sup>b</sup> RIP values are based on the inhibitory potency of methyl α-D-mannopyranoside (MeMan) tested on the same 96 well microplate (IP (MeMan) ≡ 1); RIP(glycan) = IC<sub>50</sub>(MeMan)/IC<sub>50</sub>(glycan). Fitting errors in brackets are calculated by error propagation using the following formula:

$$\Delta \text{RIP} = \left| \frac{1}{\text{IC}_{50}(\text{glycan})} \cdot \Delta \text{IC}_{50}(\text{MeMan}) \right| + \left| -\frac{\text{IC}_{50}(\text{MeMan})}{\text{IC}_{50}(\text{glycan})^2} \cdot \Delta \text{IC}_{50}(\text{glycan}) \right|$$

<sup>c</sup> Mean RIP values of two or three independent experiments with error propagation using the following formula:

$$\Delta \text{Mean RIP} = \frac{1}{3} \sqrt{(\Delta \text{RIP}_A)^2 + (\Delta \text{RIP}_B)^2 + (\Delta \text{RIP}_C)^2} \text{ or } \Delta \text{Mean RIP} = \frac{1}{2} \sqrt{(\Delta \text{RIP}_A)^2 + (\Delta \text{RIP}_D)^2}$$

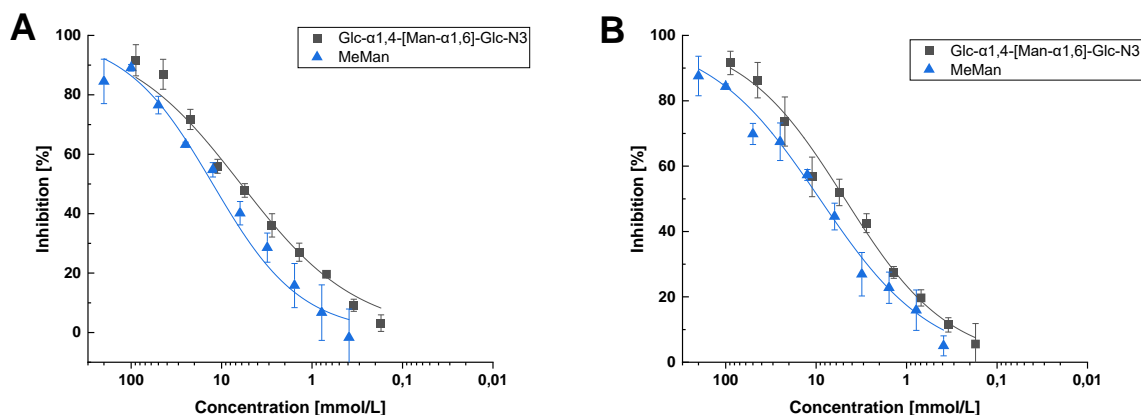

**Figure S3.** Adhesion-inhibition curves of MeMan, Glc- $\alpha$ 1,4-[Man- $\alpha$ 1,6]-Glc- $\beta$ N<sub>3</sub> (**32**) as inhibitor of type 1 fimbriae-mediated bacterial adhesion of *E. coli* bacteria (PKL1162) to mannan. As a reference MeMan was tested in parallel on the same plate. Sigmoidal dose-responsive inhibition curves were fitted by non-linear regression. Error bars are standard deviations from duplicate or triplicate results on one plate.

**Table S2** IC<sub>50</sub> values and corresponding RIP values as deduced from the inhibition curves obtained with MeMan, Glc- $\alpha$ 1,4-[Man- $\alpha$ 1,6]-Glc- $\beta$ N<sub>3</sub> (**32**) (Figure S3).

| Plate | Entry                                | MeMan               | Glc- $\alpha$ 1,4-[Man- $\alpha$ 1,6]-Glc- $\beta$ N <sub>3</sub> ( <b>32</b> ) |
|-------|--------------------------------------|---------------------|---------------------------------------------------------------------------------|
| A     | IC <sub>50</sub> <sup>a</sup> [mmol] | 12.52 ( $\pm$ 1.00) | 6.12 ( $\pm$ 0.57)                                                              |
|       | RIP <sup>b</sup>                     | 1.00                | 2.04 ( $\pm$ 0.35)                                                              |
| B     | IC <sub>50</sub> <sup>a</sup> [mmol] | 9.13 ( $\pm$ 0.75)  | 4.82 ( $\pm$ 0.31)                                                              |
|       | RIP <sup>b</sup>                     | 1.00                | 1.90 ( $\pm$ 0.28)                                                              |
|       | Mean RIP <sup>c</sup>                | 1.00                | 1.97 ( $\pm$ 0.22)                                                              |

<sup>a</sup> IC<sub>50</sub> values are average values of duplicate or triplicate results on one plate. The fitting error from non-linear regression is given in brackets.

<sup>b</sup> RIP values are based on the inhibitory potency of methyl  $\alpha$ -D-mannopyranoside (MeMan) tested on the same 96 well microplate (IP (MeMan)  $\equiv$  1); RIP(glycan) = IC<sub>50</sub>(MeMan)/IC<sub>50</sub>(glycan). Fitting errors in brackets are calculated by error propagation using the formula from table S1.

<sup>c</sup> Mean RIP values of two independent experiments with error propagation using the formula from Table S1.

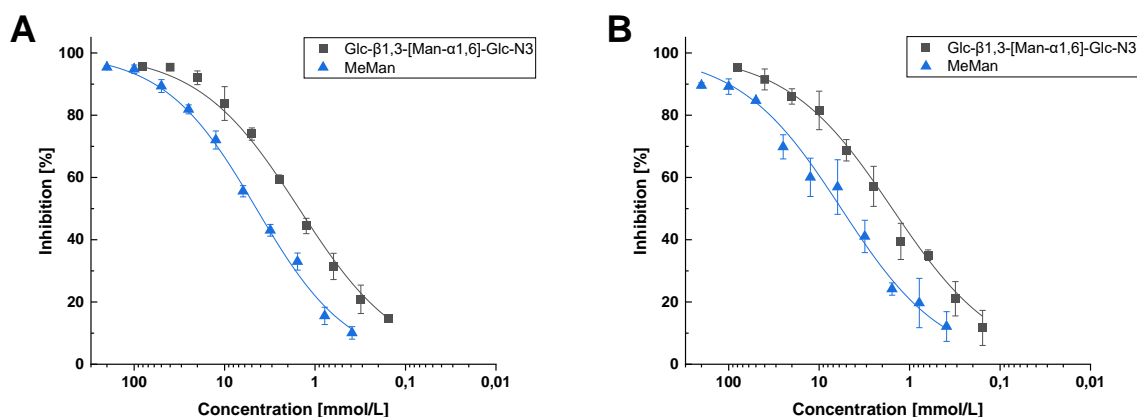

**Figure S4.** Adhesion-inhibition curves of MeMan, Glc- $\beta$ 1,3-[Man- $\alpha$ 1,6]-Glc- $\beta$ N<sub>3</sub> (**37**) as inhibitor of type 1 fimbriae-mediated bacterial adhesion of *E. coli* bacteria (PKL1162) to mannan. As a reference MeMan was tested in parallel on the same plate. Sigmoidal dose-responsive inhibition curves were fitted by non-linear regression. Error bars are standard deviations from duplicate or triplicate results on one plate.

**Table S3** IC<sub>50</sub> values and corresponding RIP values as deduced from the inhibition curves obtained with MeMan, Glc- $\beta$ 1,3-[Man- $\alpha$ 1,6]-Glc- $\beta$ N<sub>3</sub> (**37**) (Figure S4).

| Plate | Entry                                | MeMan              | Glc- $\beta$ 1,3-[Man- $\alpha$ 1,6]-Glc- $\beta$ N <sub>3</sub> ( <b>37</b> ) |
|-------|--------------------------------------|--------------------|--------------------------------------------------------------------------------|
| A     | IC <sub>50</sub> <sup>a</sup> [mmol] | 4.45 ( $\pm$ 0.21) | 1.50 ( $\pm$ 0.11)                                                             |
|       | RIP <sup>b</sup>                     | 1.00               | 2.96 ( $\pm$ 0.35)                                                             |
| B     | IC <sub>50</sub> <sup>a</sup> [mmol] | 5.69 ( $\pm$ 0.82) | 1.56 ( $\pm$ 0.08)                                                             |
|       | RIP <sup>b</sup>                     | 1.00               | 3.66 ( $\pm$ 0.71)                                                             |
|       | Mean RIP <sup>c</sup>                | 1.00               | 3.31 ( $\pm$ 0.39)                                                             |

<sup>a</sup> IC<sub>50</sub> values are average values of duplicate or triplicate results on one plate. The fitting error from non-linear regression is given in brackets.

<sup>b</sup> RIP values are based on the inhibitory potency of methyl  $\alpha$ -D-mannopyranoside (MeMan) tested on the same 96 well microplate (IP (MeMan)  $\equiv$  1); RIP(glycan) = IC<sub>50</sub>(MeMan)/IC<sub>50</sub>(glycan). Fitting errors in brackets are calculated by error propagation using the formula from table S1.

<sup>c</sup> Mean RIP values of two independent experiments with error propagation using the formula from Table S1.

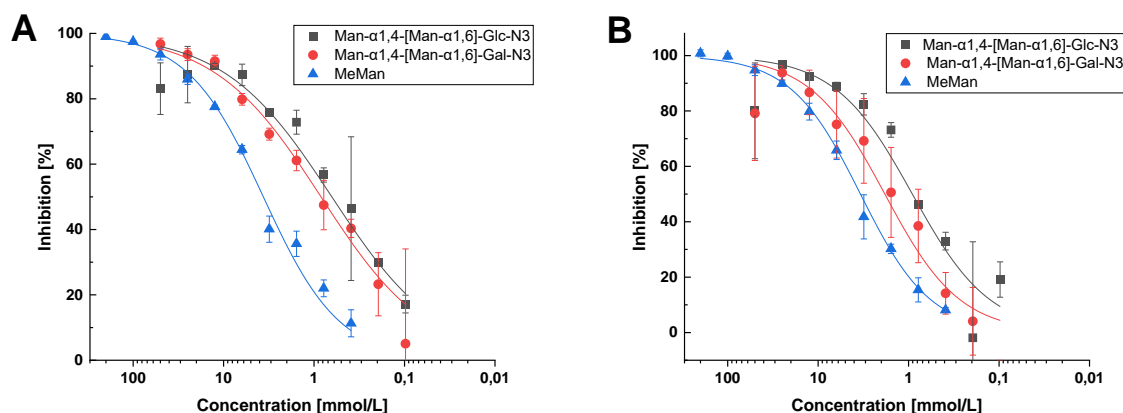

**Figure S5.** Adhesion-inhibition curves of MeMan, Man- $\alpha$ 1,4-[Man- $\alpha$ 1,6]-Glc- $\beta$ N<sub>3</sub> (**26**), Man- $\alpha$ 1,4-[Man- $\alpha$ 1,6]-Gal- $\beta$ N<sub>3</sub> (**27**) as inhibitor of type 1 fimbriae-mediated bacterial adhesion of *E. coli* bacteria (PKL1162) to mannan. As a reference MeMan was tested in parallel on the same plate. Sigmoidal dose-responsive inhibition curves were fitted by non-linear regression. Error bars are standard deviations from duplicate or triplicate results on one plate.

**Table S4** IC<sub>50</sub> values and corresponding RIP values as deduced from the inhibition curves obtained with MeMan, Man- $\alpha$ 1,4-[Man- $\alpha$ 1,6]-Glc- $\beta$ N<sub>3</sub> (**26**), Man- $\alpha$ 1,4-[Man- $\alpha$ 1,6]-Gal- $\beta$ N<sub>3</sub> (**27**) (Figure S5).

| Plate | Entry                                | MeMan              | Man- $\alpha$ 1,4-[Man- $\alpha$ 1,6]-Glc- $\beta$ N <sub>3</sub> ( <b>26</b> ) | Man- $\alpha$ 1,4-[Man- $\alpha$ 1,6]-Gal- $\beta$ N <sub>3</sub> ( <b>27</b> ) |
|-------|--------------------------------------|--------------------|---------------------------------------------------------------------------------|---------------------------------------------------------------------------------|
| A     | IC <sub>50</sub> <sup>a</sup> [mmol] | 3.64 ( $\pm$ 0.22) | 0.63 ( $\pm$ 0.02)                                                              | 0.84 ( $\pm$ 0.09)                                                              |
|       | RIP <sup>b</sup>                     | 1.00               | 5.72 ( $\pm$ 0.57)                                                              | 4.34 ( $\pm$ 0.76)                                                              |
| B     | IC <sub>50</sub> <sup>a</sup> [mmol] | 3.41 ( $\pm$ 0.14) | 0.91 ( $\pm$ 0.01)                                                              | 1.42 ( $\pm$ 0.26)                                                              |
|       | RIP <sup>b</sup>                     | 1.00               | 3.75 ( $\pm$ 0.21)                                                              | 2.41 ( $\pm$ 0.55)                                                              |
|       | Mean RIP <sup>c</sup>                | 1.00               | 4.73 ( $\pm$ 0.30)                                                              | 3.37 ( $\pm$ 0.47)                                                              |

<sup>a</sup> IC<sub>50</sub> values are average values of duplicate or triplicate results on one plate. The fitting error from non-linear regression is given in brackets.

<sup>b</sup> RIP values are based on the inhibitory potency of methyl  $\alpha$ -D-mannopyranoside (MeMan) tested on the same 96 well microplate (IP (MeMan)  $\equiv$  1); RIP(glycan) = IC<sub>50</sub>(MeMan)/IC<sub>50</sub>(glycan). Fitting errors in brackets are calculated by error propagation using the formula from table S1.

<sup>c</sup> Mean RIP values of two independent experiments with error propagation using the formula from Table S1.



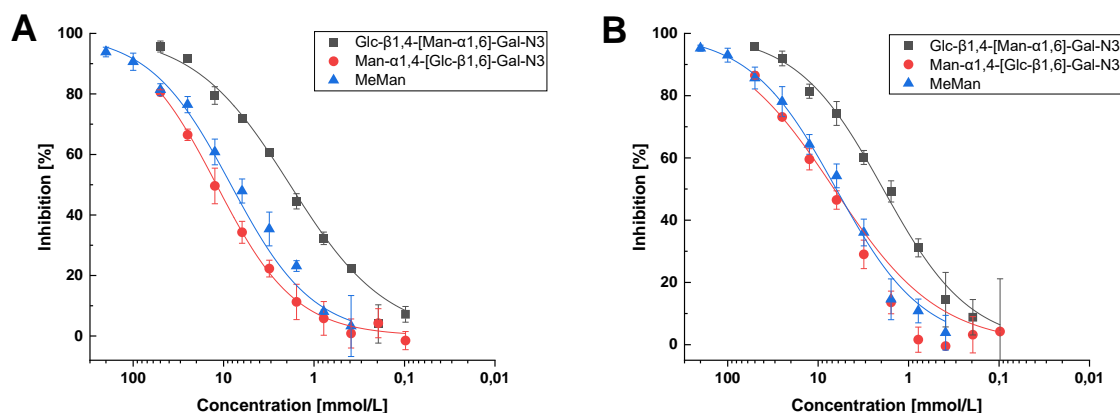

**Figure S6.** Adhesion-inhibition curves of MeMan, Glc-β1,4-[Man-α1,6]-Gal-βN<sub>3</sub> (**20**), Man-α1,4-[Glc-β1,6]-Gal-βN<sub>3</sub> (**21**) as inhibitor of type 1 fimbriae-mediated bacterial adhesion of *E. coli* bacteria (PKL1162) to mannan. As a reference MeMan was tested in parallel on the same plate. Sigmoidal dose-responsive inhibition curves were fitted by non-linear regression. Error bars are standard deviations from duplicate or triplicate results on one plate.

**Table S5** IC<sub>50</sub> values and corresponding RIP values as deduced from the inhibition curves obtained with MeMan, Glc-β1,4-[Man-α1,6]-Gal-βN<sub>3</sub> (**20**), Man-α1,4-[Glc-β1,6]-Gal-βN<sub>3</sub> (**21**) (Figure S6).

| Plate | Entry                                | MeMan         | Glc-β1,4-[Man-α1,6]-Gal-βN <sub>3</sub> ( <b>20</b> ) | Man-α1,4-[Glc-β1,6]-Gal-βN <sub>3</sub> ( <b>21</b> ) |
|-------|--------------------------------------|---------------|-------------------------------------------------------|-------------------------------------------------------|
| A     | IC <sub>50</sub> <sup>a</sup> [mmol] | 8.31 (±0.84)  | 1.85 (±0.04)                                          | 11.99 (±0.33)                                         |
|       | RIP <sup>b</sup>                     | 1.00          | 4.50 (±0.56)                                          | 0.69 (±0.09)                                          |
| B     | IC <sub>50</sub> <sup>a</sup> [mmol] | 6.30 (± 0.39) | 1.91 (±0.10)                                          | 6.65 (±0.64)                                          |
|       | RIP <sup>b</sup>                     | 1.00          | 3.30 (±0.38)                                          | 0.95 (±0.15)                                          |
|       | Mean RIP <sup>c</sup>                | 1.00          | 3.90 (±0.34)                                          | 0.82 (±0.09)                                          |

<sup>a</sup> IC<sub>50</sub> values are average values of duplicate or triplicate results on one plate. The fitting error from non-linear regression is given in brackets.

<sup>b</sup> RIP values are based on the inhibitory potency of methyl α-D-mannopyranoside (MeMan) tested on the same 96 well microplate (IP (MeMan) ≡ 1); RIP(glycan) = IC<sub>50</sub>(MeMan)/IC<sub>50</sub>(glycan). Fitting errors in brackets are calculated by error propagation using the formula from table S1.

<sup>c</sup> Mean RIP values of two independent experiments with error propagation using the formula from Table S1.

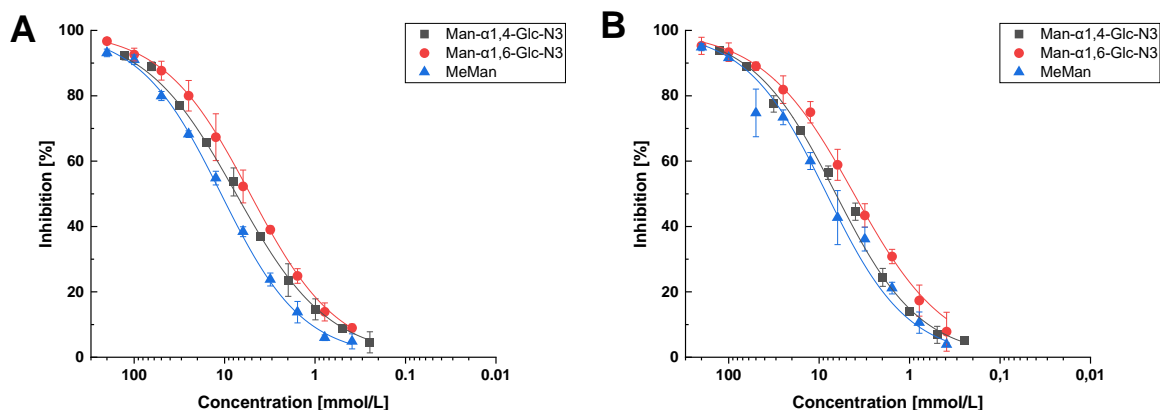

**Figure S7.** Adhesion-inhibition curves of MeMan, Man- $\alpha$ 1,4-Glc- $\beta$ N<sub>3</sub> (**S6**), Man- $\alpha$ 1,6-Glc- $\beta$ N<sub>3</sub> (**S1**) as inhibitor of type 1 fimbriae-mediated bacterial adhesion of *E. coli* bacteria (PKL1162) to mannan. As a reference MeMan was tested in parallel on the same plate. Sigmoidal dose-responsive inhibition curves were fitted by non-linear regression. Error bars are standard deviations from duplicate or triplicate results on one plate.

**Table S6** IC<sub>50</sub> values and corresponding RIP values as deduced from the inhibition curves obtained with MeMan, Man- $\alpha$ 1,4-Glc- $\beta$ N<sub>3</sub> (**S6**), Man- $\alpha$ 1,6-Glc- $\beta$ N<sub>3</sub> (**S1**) (Figure S7).

| Plate | Entry                                | MeMan               | Man- $\alpha$ 1,4-Glc- $\beta$ N <sub>3</sub> ( <b>S6</b> ) | Man- $\alpha$ 1,6-Glc- $\beta$ N <sub>3</sub> ( <b>S1</b> ) |
|-------|--------------------------------------|---------------------|-------------------------------------------------------------|-------------------------------------------------------------|
| A     | IC <sub>50</sub> <sup>a</sup> [mmol] | 10.95 ( $\pm$ 0.34) | 7.47 ( $\pm$ 0.11)                                          | 5.22 ( $\pm$ 0.08)                                          |
|       | RIP <sup>b</sup>                     | 1.00                | 1.47 ( $\pm$ 0.07)                                          | 2.10 ( $\pm$ 0.10)                                          |
| B     | IC <sub>50</sub> <sup>a</sup> [mmol] | 8.26 ( $\pm$ 0.62)  | 6.56 ( $\pm$ 0.08)                                          | 4.12 ( $\pm$ 0.14)                                          |
|       | RIP <sup>b</sup>                     | 1.00                | 1.26 ( $\pm$ 0.11)                                          | 2.00 ( $\pm$ 0.22)                                          |
|       | Mean RIP <sup>c</sup>                | 1.00                | 1.36 ( $\pm$ 0.06)                                          | 2.05 ( $\pm$ 0.12)                                          |

<sup>a</sup> IC<sub>50</sub> values are average values of duplicate or triplicate results on one plate. The fitting error from non-linear regression is given in brackets.

<sup>b</sup> RIP values are based on the inhibitory potency of methyl  $\alpha$ -D-mannopyranoside (MeMan) tested on the same 96 well microplate (IP (MeMan)  $\equiv$  1); RIP(glycan) = IC<sub>50</sub>(MeMan)/IC<sub>50</sub>(glycan). Fitting errors in brackets are calculated by error propagation using the formula from table S1.

<sup>c</sup> Mean RIP values of two independent experiments with error propagation using the formula from Table S1.

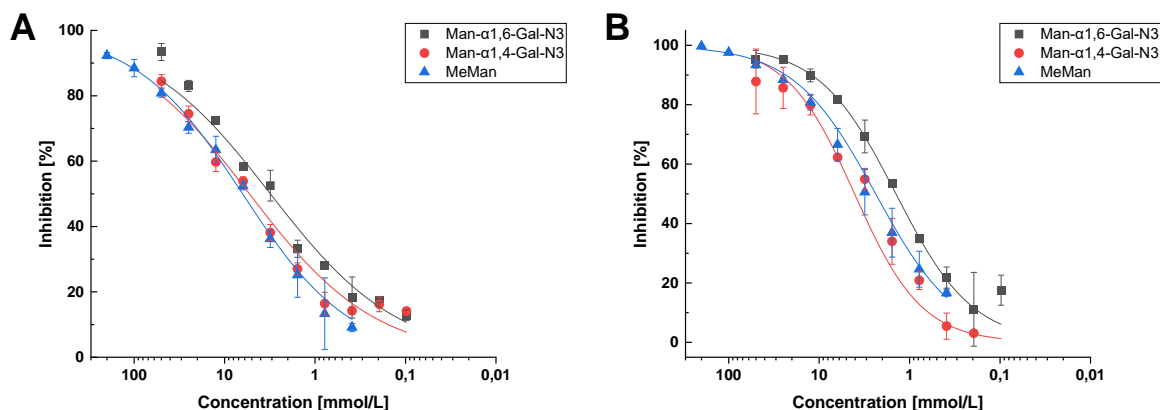

**Figure S8.** Adhesion-inhibition curves of MeMan, Man- $\alpha$ 1,6-Gal- $\beta$ N<sub>3</sub> (**45**), Man- $\alpha$ 1,4-Gal- $\beta$ N<sub>3</sub> (**S7**) as inhibitor of type 1 fimbriae-mediated bacterial adhesion of *E. coli* bacteria (PKL1162) to mannan. As a reference MeMan was tested in parallel on the same plate. Sigmoidal dose-responsive inhibition curves were fitted by non-linear regression. Error bars are standard deviations from duplicate or triplicate results on one plate.

**Table S7.** IC<sub>50</sub> values and corresponding RIP values as deduced from the inhibition curves obtained with MeMan, Man- $\alpha$ 1,6-Gal- $\beta$ N<sub>3</sub> (**45**), Man- $\alpha$ 1,4-Gal- $\beta$ N<sub>3</sub> (**S7**) (Figure S8).

| Plate | Entry                                | MeMan              | Man- $\alpha$ 1,6-Gal- $\beta$ N <sub>3</sub><br>( <b>45</b> ) | Man- $\alpha$ 1,4-Gal- $\beta$ N <sub>3</sub><br>( <b>S7</b> ) |
|-------|--------------------------------------|--------------------|----------------------------------------------------------------|----------------------------------------------------------------|
| A     | IC <sub>50</sub> <sup>a</sup> [mmol] | 6.32 ( $\pm$ 0.37) | 3.12 ( $\pm$ 0.22)                                             | 5.32 ( $\pm$ 0.78)                                             |
|       | RIP <sup>b</sup>                     | 1.00               | 2.03 ( $\pm$ 0.26)                                             | 1.19 ( $\pm$ 0.24)                                             |
| B     | IC <sub>50</sub> <sup>a</sup> [mmol] | 2.37 ( $\pm$ 0.24) | 1.41 ( $\pm$ 0.04)                                             | 4.06 ( $\pm$ 0.20)                                             |
|       | RIP <sup>b</sup>                     | 1.00               | 1.67 ( $\pm$ 0.22)                                             | 0.58 ( $\pm$ 0.09)                                             |
|       | Mean RIP <sup>c</sup>                | 1.00               | 1.85 ( $\pm$ 0.17)                                             | 0.89 ( $\pm$ 0.13)                                             |

<sup>a</sup> IC<sub>50</sub> values are average values of duplicate or triplicate results on one plate. The fitting error from non-linear regression is given in brackets.

<sup>b</sup> RIP values are based on the inhibitory potency of methyl  $\alpha$ -D-mannopyranoside (MeMan) tested on the same 96 well microplate (IP (MeMan)  $\equiv$  1); RIP(glycan) = IC<sub>50</sub>(MeMan)/IC<sub>50</sub>(glycan). Fitting errors in brackets are calculated by error propagation using the formula from table S1.

<sup>c</sup> Mean RIP values of two or three independent experiments with error propagation using the formula from Table S1.

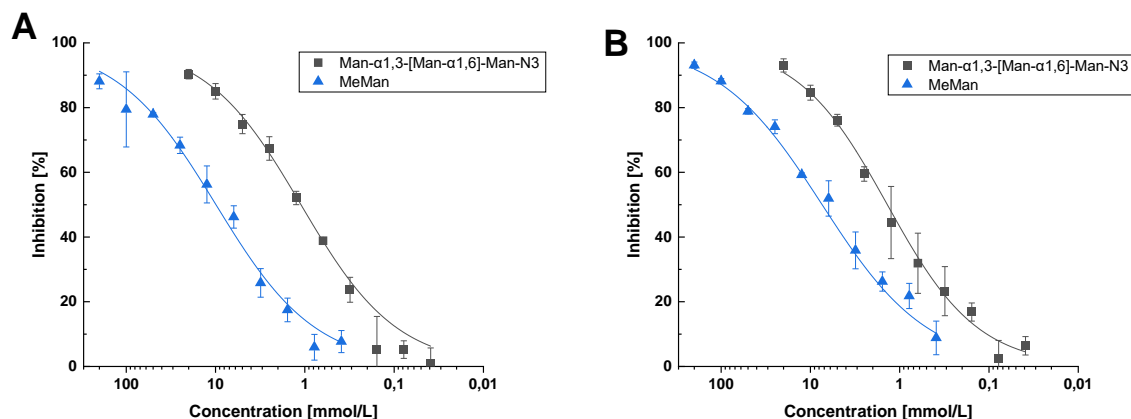

**Figure S9.** Adhesion-inhibition curves of MeMan, Man- $\alpha$ 1,3-[Man- $\alpha$ 1,6]-Man- $\beta$ N<sub>3</sub> (**41**) as inhibitor of type 1 fimbriae-mediated bacterial adhesion of *E. coli* bacteria (PKL1162) to mannan. As a reference MeMan was tested in parallel on the same plate. Sigmoidal dose-responsive inhibition curves were fitted by non-linear regression. Error bars are standard deviations from duplicate or triplicate results on one plate.

**Table S8.** IC<sub>50</sub> values and corresponding RIP values as deduced from the inhibition curves obtained with MeMan, Man- $\alpha$ 1,3-[Man- $\alpha$ 1,6]-Man- $\beta$ N<sub>3</sub> (**41**) (Figure S9).

| Plate | Entry                                | MeMan              | Man- $\alpha$ 1,3-[Man- $\alpha$ 1,6]-Man- $\beta$ N <sub>3</sub> ( <b>41</b> ) |
|-------|--------------------------------------|--------------------|---------------------------------------------------------------------------------|
| A     | IC <sub>50</sub> <sup>a</sup> [mmol] | 9.89 ( $\pm$ 0.68) | 1.11 ( $\pm$ 0.03)                                                              |
|       | RIP <sup>b</sup>                     | 1.00               | 8.95 ( $\pm$ 0.88)                                                              |
| B     | IC <sub>50</sub> <sup>a</sup> [mmol] | 7.39 ( $\pm$ 0.36) | 1.38 ( $\pm$ 0.10)                                                              |
|       | RIP <sup>b</sup>                     | 1.00               | 5.37 ( $\pm$ 0.66)                                                              |
|       | Mean RIP <sup>c</sup>                | 1.00               | 7.16 ( $\pm$ 0.55)                                                              |

<sup>a</sup> IC<sub>50</sub> values are average values of duplicate or triplicate results on one plate. The fitting error from non-linear regression is given in brackets.

<sup>b</sup> RIP values are based on the inhibitory potency of methyl  $\alpha$ -D-mannopyranoside (MeMan) tested on the same 96 well microplate (IP (MeMan)  $\equiv$  1); RIP(glycan) = IC<sub>50</sub>(MeMan)/IC<sub>50</sub>(glycan). Fitting errors in brackets are calculated by error propagation using the formula from table S1.

<sup>c</sup> Mean RIP values of two independent experiments with error propagation using the formula from Table S1.

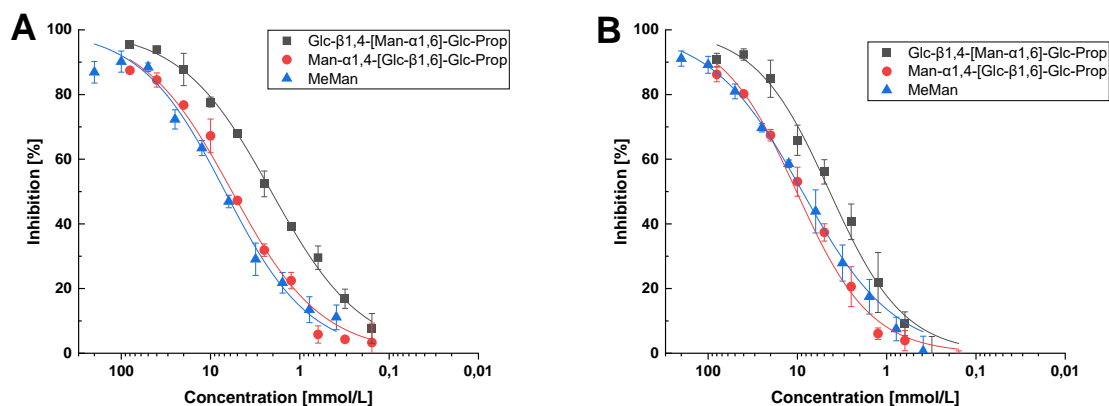

**Figure S10.** Adhesion-inhibition curves of MeMan, Glc-β1,4-[Man-α1,6]-Glc-βProp (**S3**), Man-α1,4-[Glc-β1,6]-Glc-βProp (**S2**) as inhibitor of type 1 fimbriae-mediated bacterial adhesion of *E. coli* bacteria (PKL1162) to mannan. As a reference MeMan was tested in parallel on the same plate. Sigmoidal dose-responsive inhibition curves were fitted by non-linear regression. Error bars are standard deviations from duplicate or triplicate results on one plate.

**Table S9.** IC<sub>50</sub> values and corresponding RIP values as deduced from the inhibition curves obtained with MeMan, Glc-β1,4-[Man-α1,6]-Glc-βProp (**S3**), Man-α1,4-[Glc-β1,6]-Glc-βProp (**S2**) (Figure S10).

| Plate | Entry                                | MeMan        | Glc-β1,4-[Man-α1,6]-Glc-βProp ( <b>S3</b> ) | Man-α1,4-[Glc-β1,6]-Glc-βProp ( <b>S2</b> ) |
|-------|--------------------------------------|--------------|---------------------------------------------|---------------------------------------------|
| A     | IC <sub>50</sub> <sup>a</sup> [mmol] | 6.88 (±0.52) | 2.09 (±0.04)                                | 5.75 (±0.30)                                |
|       | RIP <sup>b</sup>                     | 1.00         | 3.29 (±0.31)                                | 1.20 (±0.15)                                |
| B     | IC <sub>50</sub> <sup>a</sup> [mmol] | 8.81 (±0.41) | 4.36 (±0.54)                                | 10.24 (±0.69)                               |
|       | RIP <sup>b</sup>                     | 1.00         | 2.02 (±0.35)                                | 0.86 (±0.10)                                |
|       | Mean RIP <sup>c</sup>                | 1.00         | 2.66 (±0.23)                                | 1.03 (±0.09)                                |

<sup>a</sup> IC<sub>50</sub> values are average values of duplicate or triplicate results on one plate. The fitting error from non-linear regression is given in brackets.

<sup>b</sup> RIP values are based on the inhibitory potency of methyl α-D-mannopyranoside (MeMan) tested on the same 96 well microplate (IP (MeMan) ≡ 1); RIP(glycan) = IC<sub>50</sub>(MeMan)/IC<sub>50</sub>(glycan). Fitting errors in brackets are calculated by error propagation using the formula from table S1.

<sup>c</sup> Mean RIP values of two independent experiments with error propagation using the formula from Table S1.

## 4. Molecular Modelling

For molecular modelling the Schrödinger software package implementing the Maestro interface was used. Ligands were built using Maestro and prepared for docking using LigPrep and the OPLS4 force field. The crystal structure of FimH in its closed gate (pdb: 1UWF) conformation was constructed using the protein preparation wizard implemented in Maestro.

### Induced fit docking

Induced fit docking (IFD) was performed using the standard IFD protocol with the OPLS4 force field. The receptor protein (FimH) was defined as an outer box of 36 Å around the centroid of the ligand as complexed within the binding site of FimH (pdb: 1UWF). A constraint was added to match the mannose core structure of butyl  $\alpha$ -D-mannopyranoside in the crystal structure with a tolerance of 1.0 Å during docking. Ligands were set flexible and sampled for ring conformations with an energy window of 2.5 kcal mol<sup>-1</sup>. Non-planar amide bonds were penalized. Glide redocking was performed with extra precision (XP) for structures within 30 kcal mol<sup>-1</sup> of the best structure, employing a maximum of 20 top-ranked structures. Results are collected in Table S10.

The top five binding poses according to the IFD score ranking were subjected to a binding pose metadynamics simulation to determine the most stable protein-ligand complex. For each binding pose metadynamics simulations (10 trials of 10 ns) were performed and averaged. Then, the binding pose with the lowest metadynamics composite score was selected as the most stable one. Computed results are collected in Table S11 and in Figure S12 and graphical representations of computed binding poses are represented in Figure S11.

Calculation of binding energies was performed by subjecting the most stable binding poses from binding pose metadynamics simulations to a MM-GBSA (molecular mechanics generalized born surface area) calculation, giving the free binding energy  $\Delta G_{\text{Bind}}$  in kcal mol<sup>-1</sup>. The MM-GBSA calculations were performed using the VGSB solvation model and the OPLS4 force field. Results are reported in Table S12.

**Table S10.** Scoring values for IFD docking of glycans into the closed gate conformation of FimH (pdb: 1UWF).

| glycan                            | IFD<br>Score | docking<br>score | XP<br>HBond | glide<br>evdw | glide<br>lipo | glide<br>ecoul | glide<br>energy | glide<br>emodel |
|-----------------------------------|--------------|------------------|-------------|---------------|---------------|----------------|-----------------|-----------------|
| Man- $\alpha$ 1,4-Glc- $\beta$ N3 | -341.39      | -10.215          | -7.12       | -18.63        | -0.32         | -33.35         | -51.98          | -77.23          |
| Man- $\alpha$ 1,4-Glc- $\beta$ N3 | -341.39      | -10.203          | -7.16       | -18.05        | -0.31         | -31.22         | -49.27          | -76.01          |
| Man- $\alpha$ 1,4-Glc- $\beta$ N3 | -341.37      | -10.229          | -7.13       | -16.51        | -0.33         | -31.37         | -47.88          | -75.57          |
| Man- $\alpha$ 1,4-Glc- $\beta$ N3 | -341.37      | -10.180          | -7.15       | -18.33        | -0.32         | -35.52         | -53.85          | -78.22          |
| Man- $\alpha$ 1,4-Glc- $\beta$ N3 | -341.27      | -9.938           | -6.94       | -18.35        | -0.32         | -33.35         | -51.70          | -78.05          |
| Man- $\alpha$ 1,4-Glc- $\beta$ N3 | -341.18      | -10.085          | -7.10       | -19.11        | -0.31         | -30.60         | -49.72          | -78.75          |
| Man- $\alpha$ 1,4-Glc- $\beta$ N3 | -341.17      | -10.048          | -7.05       | -18.23        | -0.31         | -28.57         | -46.80          | -74.05          |
| Man- $\alpha$ 1,4-Glc- $\beta$ N3 | -341.17      | -10.161          | -7.16       | -19.09        | -0.20         | -34.98         | -54.07          | -78.81          |
| Man- $\alpha$ 1,4-Glc- $\beta$ N3 | -341.11      | -9.999           | -6.93       | -19.14        | -0.03         | -30.50         | -49.63          | -78.55          |
| Man- $\alpha$ 1,4-Glc- $\beta$ N3 | -341.06      | -9.982           | -6.93       | -18.86        | -0.31         | -32.84         | -51.70          | -81.31          |
| Man- $\alpha$ 1,4-Glc- $\beta$ N3 | -340.78      | -9.578           | -6.81       | -19.69        | -0.21         | -32.19         | -51.88          | -73.98          |

|                                                      |         |         |       |        |       |        |        |         |
|------------------------------------------------------|---------|---------|-------|--------|-------|--------|--------|---------|
| Man- $\alpha$ 1,4-Glc- $\beta$ N3                    | -340.73 | -9.502  | -6.98 | -14.46 | -0.26 | -36.64 | -51.11 | -72.79  |
| Man- $\alpha$ 1,4-Glc- $\beta$ N3                    | -340.73 | -9.749  | -6.79 | -19.50 | -0.31 | -37.55 | -57.05 | -82.80  |
| Man- $\alpha$ 1,4-Glc- $\beta$ N3                    | -340.63 | -9.775  | -6.71 | -21.61 | -0.30 | -34.05 | -55.66 | -73.56  |
| Man- $\alpha$ 1,4-Glc- $\beta$ N3                    | -340.56 | -9.599  | -6.63 | -17.05 | -0.21 | -35.56 | -52.60 | -72.73  |
| Man- $\alpha$ 1,4-Glc- $\beta$ N3                    | -340.50 | -9.353  | -6.62 | -16.26 | -0.32 | -35.34 | -51.60 | -76.86  |
| Man- $\alpha$ 1,4-Glc- $\beta$ N3                    | -340.47 | -9.739  | -7.33 | -13.24 | -0.18 | -39.91 | -53.15 | -81.95  |
| Man- $\alpha$ 1,4-Glc- $\beta$ N3                    | -340.29 | -9.342  | -6.81 | -15.59 | -0.19 | -36.18 | -51.77 | -83.03  |
| Man- $\alpha$ 1,4-Glc- $\beta$ N3                    | -340.00 | -9.368  | -6.27 | -18.26 | -0.33 | -36.38 | -54.65 | -73.73  |
| Man- $\alpha$ 1,6-Glc- $\beta$ N3                    | -341.97 | -10.612 | -7.35 | -21.89 | -0.05 | -39.82 | -61.72 | -92.71  |
| Man- $\alpha$ 1,6-Glc- $\beta$ N3                    | -341.48 | -9.992  | -6.73 | -21.77 | -0.14 | -33.72 | -55.48 | -80.76  |
| Man- $\alpha$ 1,6-Glc- $\beta$ N3                    | -341.40 | -10.168 | -7.43 | -19.04 | -0.10 | -37.45 | -56.49 | -79.31  |
| Man- $\alpha$ 1,6-Glc- $\beta$ N3                    | -341.10 | -9.819  | -7.31 | -17.57 | -0.04 | -37.87 | -55.45 | -77.89  |
| Man- $\alpha$ 1,6-Glc- $\beta$ N3                    | -341.09 | -9.740  | -6.90 | -20.36 | -0.12 | -33.33 | -53.69 | -82.20  |
| Man- $\alpha$ 1,6-Glc- $\beta$ N3                    | -340.94 | -9.446  | -6.36 | -20.43 | -0.41 | -34.51 | -54.94 | -79.59  |
| Man- $\alpha$ 1,6-Glc- $\beta$ N3                    | -340.84 | -9.512  | -6.92 | -20.29 | -0.07 | -34.98 | -55.27 | -79.33  |
| Man- $\alpha$ 1,6-Glc- $\beta$ N3                    | -340.79 | -9.670  | -6.61 | -22.20 | -0.17 | -32.67 | -54.87 | -83.19  |
| Man- $\alpha$ 1,6-Glc- $\beta$ N3                    | -340.79 | -9.671  | -7.22 | -16.30 | -0.42 | -38.27 | -54.56 | -85.59  |
| Man- $\alpha$ 1,6-Glc- $\beta$ N3                    | -340.74 | -9.289  | -6.43 | -21.51 | -0.01 | -38.37 | -59.88 | -93.26  |
| Man- $\alpha$ 1,6-Glc- $\beta$ N3                    | -340.68 | -9.113  | -6.25 | -16.86 | -0.26 | -40.01 | -56.86 | -82.01  |
| Man- $\alpha$ 1,6-Glc- $\beta$ N3                    | -340.63 | -9.328  | -6.26 | -18.68 | -0.16 | -38.05 | -56.72 | -87.35  |
| Man- $\alpha$ 1,6-Glc- $\beta$ N3                    | -340.61 | -9.606  | -6.44 | -20.47 | -0.19 | -35.19 | -55.66 | -81.79  |
| Man- $\alpha$ 1,6-Glc- $\beta$ N3                    | -340.50 | -9.030  | -6.21 | -19.17 | -0.26 | -37.23 | -56.40 | -80.05  |
| Man- $\alpha$ 1,6-Glc- $\beta$ N3                    | -340.45 | -8.952  | -6.21 | -19.16 | -0.08 | -37.14 | -56.30 | -81.88  |
| Man- $\alpha$ 1,6-Glc- $\beta$ N3                    | -340.17 | -9.124  | -5.99 | -19.32 | -0.07 | -33.42 | -52.74 | -80.07  |
| Man- $\alpha$ 1,6-Glc- $\beta$ N3                    | -340.06 | -8.736  | -6.13 | -23.35 | -0.04 | -32.92 | -56.27 | -77.88  |
| Man- $\alpha$ 1,6-Glc- $\beta$ N3                    | -339.99 | -9.169  | -5.97 | -23.49 | -0.25 | -34.93 | -58.43 | -88.24  |
| Man- $\alpha$ 1,6-Glc- $\beta$ N3                    | -339.99 | -9.052  | -5.97 | -19.26 | -0.20 | -37.37 | -56.63 | -81.91  |
| Man- $\alpha$ 1,6-Glc- $\beta$ N3                    | -339.75 | -8.764  | -5.96 | -17.63 | -0.47 | -34.68 | -52.31 | -75.67  |
| Man- $\alpha$ 1,4-[Glc- $\beta$ 1,6]-Glc- $\beta$ N3 | -342.25 | -10.753 | -7.40 | -22.10 | -0.47 | -38.86 | -60.96 | -86.43  |
| Man- $\alpha$ 1,4-[Glc- $\beta$ 1,6]-Glc- $\beta$ N3 | -342.19 | -10.781 | -7.96 | -20.51 | -0.25 | -37.19 | -57.70 | -92.18  |
| Man- $\alpha$ 1,4-[Glc- $\beta$ 1,6]-Glc- $\beta$ N3 | -342.17 | -10.964 | -7.46 | -25.49 | -0.62 | -36.44 | -61.92 | -91.23  |
| Man- $\alpha$ 1,4-[Glc- $\beta$ 1,6]-Glc- $\beta$ N3 | -342.12 | -10.927 | -7.89 | -25.11 | -0.28 | -41.18 | -66.28 | -93.44  |
| Man- $\alpha$ 1,4-[Glc- $\beta$ 1,6]-Glc- $\beta$ N3 | -342.10 | -10.792 | -7.34 | -26.01 | -0.26 | -39.81 | -65.82 | -90.22  |
| Man- $\alpha$ 1,4-[Glc- $\beta$ 1,6]-Glc- $\beta$ N3 | -342.04 | -10.859 | -7.45 | -25.91 | -0.43 | -41.38 | -67.29 | -95.18  |
| Man- $\alpha$ 1,4-[Glc- $\beta$ 1,6]-Glc- $\beta$ N3 | -341.98 | -10.563 | -7.20 | -25.14 | -0.38 | -39.82 | -64.96 | -90.89  |
| Man- $\alpha$ 1,4-[Glc- $\beta$ 1,6]-Glc- $\beta$ N3 | -341.96 | -10.433 | -7.07 | -22.79 | -0.30 | -39.17 | -61.96 | -87.39  |
| Man- $\alpha$ 1,4-[Glc- $\beta$ 1,6]-Glc- $\beta$ N3 | -341.88 | -10.262 | -6.73 | -28.37 | -0.29 | -34.75 | -63.12 | -86.59  |
| Man- $\alpha$ 1,4-[Glc- $\beta$ 1,6]-Glc- $\beta$ N3 | -341.78 | -11.068 | -7.55 | -27.44 | -0.37 | -36.48 | -63.92 | -93.45  |
| Man- $\alpha$ 1,4-[Glc- $\beta$ 1,6]-Glc- $\beta$ N3 | -341.71 | -10.503 | -7.27 | -24.20 | -0.43 | -38.65 | -62.85 | -86.16  |
| Man- $\alpha$ 1,4-[Glc- $\beta$ 1,6]-Glc- $\beta$ N3 | -341.64 | -10.442 | -7.62 | -19.16 | -0.29 | -35.48 | -54.64 | -90.88  |
| Man- $\alpha$ 1,4-[Glc- $\beta$ 1,6]-Glc- $\beta$ N3 | -341.61 | -10.067 | -7.30 | -20.87 | -0.47 | -44.56 | -65.42 | -97.40  |
| Man- $\alpha$ 1,4-[Glc- $\beta$ 1,6]-Glc- $\beta$ N3 | -341.46 | -10.620 | -8.07 | -21.71 | -0.16 | -45.23 | -66.95 | -102.36 |
| Man- $\alpha$ 1,4-[Glc- $\beta$ 1,6]-Glc- $\beta$ N3 | -341.43 | -10.309 | -7.42 | -20.03 | -0.36 | -40.82 | -60.85 | -92.55  |
| Man- $\alpha$ 1,4-[Glc- $\beta$ 1,6]-Glc- $\beta$ N3 | -341.41 | -10.219 | -6.80 | -28.01 | -0.42 | -40.74 | -68.74 | -96.97  |

|                                                       |         |         |       |        |       |        |        |         |
|-------------------------------------------------------|---------|---------|-------|--------|-------|--------|--------|---------|
| Man- $\alpha$ 1,4-[Glc- $\beta$ 1,6]-Glc- $\beta$ N3  | -341.38 | -9.857  | -7.43 | -15.45 | -0.30 | -47.15 | -62.60 | -95.30  |
| Man- $\alpha$ 1,4-[Glc- $\beta$ 1,6]-Glc- $\beta$ N3  | -341.31 | -10.220 | -7.77 | -18.10 | -0.51 | -41.68 | -59.78 | -90.12  |
| Man- $\alpha$ 1,4-[Glc- $\beta$ 1,6]-Glc- $\beta$ N3  | -341.12 | -10.431 | -7.13 | -25.23 | -0.07 | -36.76 | -61.99 | -89.11  |
| Glc- $\beta$ 1,4-[Man- $\alpha$ 1,6]-Glc- $\beta$ N3  | -342.93 | -11.218 | -8.11 | -27.14 | -0.02 | -47.05 | -74.19 | -113.72 |
| Glc- $\beta$ 1,4-[Man- $\alpha$ 1,6]-Glc- $\beta$ N3  | -342.59 | -10.944 | -8.08 | -22.59 | -0.02 | -49.85 | -72.43 | -112.35 |
| Glc- $\beta$ 1,4-[Man- $\alpha$ 1,6]-Glc- $\beta$ N3  | -342.57 | -10.465 | -7.64 | -23.64 | -0.30 | -40.18 | -63.82 | -87.91  |
| Glc- $\beta$ 1,4-[Man- $\alpha$ 1,6]-Glc- $\beta$ N3  | -342.24 | -10.117 | -7.26 | -23.28 | -0.30 | -42.31 | -65.58 | -100.53 |
| Glc- $\beta$ 1,4-[Man- $\alpha$ 1,6]-Glc- $\beta$ N3  | -342.21 | -10.410 | -7.59 | -19.23 | -0.27 | -37.38 | -56.61 | -91.22  |
| Glc- $\beta$ 1,4-[Man- $\alpha$ 1,6]-Glc- $\beta$ N3  | -342.11 | -10.012 | -7.39 | -19.47 | -0.63 | -41.52 | -60.99 | -86.46  |
| Glc- $\beta$ 1,4-[Man- $\alpha$ 1,6]-Glc- $\beta$ N3  | -342.04 | -10.003 | -7.29 | -22.09 | -0.58 | -41.49 | -63.58 | -91.62  |
| Glc- $\beta$ 1,4-[Man- $\alpha$ 1,6]-Glc- $\beta$ N3  | -341.99 | -10.423 | -7.66 | -20.38 | -0.03 | -49.56 | -69.94 | -110.78 |
| Glc- $\beta$ 1,4-[Man- $\alpha$ 1,6]-Glc- $\beta$ N3  | -341.85 | -10.002 | -6.71 | -22.02 | -0.30 | -39.33 | -61.34 | -100.26 |
| Glc- $\beta$ 1,4-[Man- $\alpha$ 1,6]-Glc- $\beta$ N3  | -341.75 | -10.320 | -7.80 | -23.55 | -0.32 | -35.45 | -59.00 | -89.67  |
| Glc- $\beta$ 1,4-[Man- $\alpha$ 1,6]-Glc- $\beta$ N3  | -341.60 | -9.953  | -7.77 | -12.06 | -0.30 | -43.52 | -55.57 | -91.69  |
| Glc- $\beta$ 1,4-[Man- $\alpha$ 1,6]-Glc- $\beta$ N3  | -341.57 | -10.407 | -7.48 | -25.06 | -0.15 | -35.28 | -60.34 | -96.89  |
| Glc- $\beta$ 1,4-[Man- $\alpha$ 1,6]-Glc- $\beta$ N3  | -341.29 | -9.604  | -6.14 | -24.85 | -0.43 | -34.16 | -59.01 | -93.80  |
| Glc- $\beta$ 1,4-[Man- $\alpha$ 1,6]-Glc- $\beta$ N3  | -341.28 | -9.987  | -6.67 | -24.02 | -0.20 | -35.57 | -59.59 | -92.26  |
| Glc- $\beta$ 1,4-[Man- $\alpha$ 1,6]-Glc- $\beta$ N3  | -341.26 | -9.923  | -6.86 | -25.67 | -0.02 | -40.03 | -65.70 | -106.77 |
| Glc- $\beta$ 1,4-[Man- $\alpha$ 1,6]-Glc- $\beta$ N3  | -341.23 | -9.486  | -6.77 | -23.32 | -0.25 | -37.23 | -60.55 | -85.36  |
| Glc- $\beta$ 1,4-[Man- $\alpha$ 1,6]-Glc- $\beta$ N3  | -341.10 | -9.358  | -6.83 | -23.42 | -0.22 | -38.94 | -62.35 | -88.27  |
| Glc- $\beta$ 1,4-[Man- $\alpha$ 1,6]-Glc- $\beta$ N3  | -341.07 | -9.435  | -7.14 | -15.27 | -0.32 | -44.75 | -60.03 | -80.63  |
| Glc- $\beta$ 1,4-[Man- $\alpha$ 1,6]-Glc- $\beta$ N3  | -340.88 | -9.978  | -6.77 | -23.23 | -0.36 | -33.44 | -56.67 | -93.42  |
| Glc- $\beta$ 1,4-[Man- $\alpha$ 1,6]-Glc- $\beta$ N3  | -340.43 | -8.879  | -5.85 | -26.70 | -0.21 | -39.61 | -66.30 | -97.88  |
| Man- $\alpha$ 1,4-[Man- $\alpha$ 1,6]-Glc- $\beta$ N3 | -343.39 | -11.958 | -9.46 | -17.29 | -0.21 | -47.63 | -64.93 | -96.78  |
| Man- $\alpha$ 1,4-[Man- $\alpha$ 1,6]-Glc- $\beta$ N3 | -343.18 | -11.479 | -8.49 | -20.21 | -0.17 | -42.68 | -62.89 | -101.86 |
| Man- $\alpha$ 1,4-[Man- $\alpha$ 1,6]-Glc- $\beta$ N3 | -343.18 | -11.160 | -7.93 | -22.50 | -0.09 | -40.02 | -62.52 | -109.14 |
| Man- $\alpha$ 1,4-[Man- $\alpha$ 1,6]-Glc- $\beta$ N3 | -342.95 | -11.287 | -8.65 | -11.14 | -0.49 | -37.93 | -49.07 | -91.86  |
| Man- $\alpha$ 1,4-[Man- $\alpha$ 1,6]-Glc- $\beta$ N3 | -342.55 | -10.636 | -7.75 | -21.02 | -0.06 | -44.52 | -65.54 | -108.28 |
| Man- $\alpha$ 1,4-[Man- $\alpha$ 1,6]-Glc- $\beta$ N3 | -342.43 | -11.137 | -8.45 | -18.62 | -0.32 | -37.46 | -56.08 | -85.37  |
| Man- $\alpha$ 1,4-[Man- $\alpha$ 1,6]-Glc- $\beta$ N3 | -342.35 | -10.676 | -7.80 | -15.92 | -0.52 | -36.78 | -52.70 | -93.88  |
| Man- $\alpha$ 1,4-[Man- $\alpha$ 1,6]-Glc- $\beta$ N3 | -342.28 | -10.635 | -7.59 | -22.53 | -0.15 | -39.56 | -62.09 | -104.90 |
| Man- $\alpha$ 1,4-[Man- $\alpha$ 1,6]-Glc- $\beta$ N3 | -342.23 | -10.905 | -7.91 | -31.63 | -0.25 | -40.05 | -71.69 | -102.81 |
| Man- $\alpha$ 1,4-[Man- $\alpha$ 1,6]-Glc- $\beta$ N3 | -342.18 | -10.588 | -7.22 | -26.40 | -0.10 | -38.08 | -64.48 | -107.38 |
| Man- $\alpha$ 1,4-[Man- $\alpha$ 1,6]-Glc- $\beta$ N3 | -342.10 | -11.041 | -8.29 | -12.78 | -0.34 | -38.84 | -51.62 | -84.77  |
| Man- $\alpha$ 1,4-[Man- $\alpha$ 1,6]-Glc- $\beta$ N3 | -341.80 | -10.432 | -7.45 | -24.07 | -0.23 | -36.31 | -60.38 | -90.96  |
| Man- $\alpha$ 1,4-[Man- $\alpha$ 1,6]-Glc- $\beta$ N3 | -341.79 | -10.393 | -7.38 | -25.72 | 0.00  | -41.06 | -66.78 | -121.41 |
| Man- $\alpha$ 1,4-[Man- $\alpha$ 1,6]-Glc- $\beta$ N3 | -341.77 | -9.854  | -6.92 | -19.27 | -0.04 | -40.24 | -59.50 | -107.04 |
| Man- $\alpha$ 1,4-[Man- $\alpha$ 1,6]-Glc- $\beta$ N3 | -341.62 | -9.939  | -7.23 | -20.82 | -0.46 | -39.05 | -59.88 | -91.20  |
| Man- $\alpha$ 1,4-[Man- $\alpha$ 1,6]-Glc- $\beta$ N3 | -341.59 | -9.951  | -7.25 | -21.59 | -0.41 | -39.00 | -60.59 | -94.20  |
| Man- $\alpha$ 1,4-[Man- $\alpha$ 1,6]-Glc- $\beta$ N3 | -341.46 | -9.875  | -7.67 | -3.79  | -0.48 | -41.00 | -44.79 | -98.38  |
| Man- $\alpha$ 1,4-[Man- $\alpha$ 1,6]-Glc- $\beta$ N3 | -341.09 | -9.975  | -7.62 | -14.78 | -0.30 | -43.23 | -58.01 | -88.68  |
| Man- $\alpha$ 1,4-[Man- $\alpha$ 1,6]-Glc- $\beta$ N3 | -341.00 | -9.722  | -7.08 | -21.88 | -0.06 | -38.11 | -59.99 | -104.67 |
| Man- $\alpha$ 1,4-Gal- $\beta$ N3                     | -341.42 | -10.701 | -7.73 | -20.29 | -0.21 | -37.84 | -58.12 | -86.22  |
| Man- $\alpha$ 1,4-Gal- $\beta$ N3                     | -341.32 | -10.151 | -7.20 | -21.86 | -0.22 | -32.27 | -54.14 | -75.31  |



|                                                      |         |         |       |        |       |        |        |         |
|------------------------------------------------------|---------|---------|-------|--------|-------|--------|--------|---------|
| Man- $\alpha$ 1,4-Gal- $\beta$ N3                    | -341.25 | -10.098 | -7.69 | -13.31 | -0.25 | -38.45 | -51.76 | -78.55  |
| Man- $\alpha$ 1,4-Gal- $\beta$ N3                    | -341.24 | -10.047 | -7.54 | -16.86 | -0.22 | -36.43 | -53.29 | -73.45  |
| Man- $\alpha$ 1,4-Gal- $\beta$ N3                    | -341.21 | -10.028 | -7.51 | -16.57 | -0.20 | -37.06 | -53.63 | -81.08  |
| Man- $\alpha$ 1,4-Gal- $\beta$ N3                    | -341.12 | -9.834  | -7.06 | -21.14 | -0.21 | -32.56 | -53.70 | -77.88  |
| Man- $\alpha$ 1,4-Gal- $\beta$ N3                    | -341.00 | -9.663  | -6.97 | -16.48 | -0.24 | -38.58 | -55.06 | -80.09  |
| Man- $\alpha$ 1,4-Gal- $\beta$ N3                    | -340.96 | -9.786  | -7.14 | -17.26 | -0.24 | -32.40 | -49.66 | -72.41  |
| Man- $\alpha$ 1,4-Gal- $\beta$ N3                    | -340.95 | -9.641  | -6.62 | -19.78 | -0.23 | -32.24 | -52.02 | -72.70  |
| Man- $\alpha$ 1,4-Gal- $\beta$ N3                    | -340.79 | -9.737  | -7.20 | -14.88 | -0.22 | -33.71 | -48.59 | -77.80  |
| Man- $\alpha$ 1,4-Gal- $\beta$ N3                    | -340.63 | -10.041 | -6.66 | -20.45 | -0.17 | -30.25 | -50.70 | -81.29  |
| Man- $\alpha$ 1,4-Gal- $\beta$ N3                    | -340.50 | -9.446  | -6.94 | -15.24 | -0.24 | -37.87 | -53.11 | -78.29  |
| Man- $\alpha$ 1,4-Gal- $\beta$ N3                    | -340.48 | -9.233  | -6.55 | -17.01 | -0.27 | -35.78 | -52.79 | -78.78  |
| Man- $\alpha$ 1,4-Gal- $\beta$ N3                    | -340.34 | -9.568  | -6.91 | -17.47 | -0.16 | -35.80 | -53.28 | -76.05  |
| Man- $\alpha$ 1,4-Gal- $\beta$ N3                    | -340.30 | -8.926  | -6.10 | -16.93 | -0.24 | -39.28 | -56.21 | -80.92  |
| Man- $\alpha$ 1,4-Gal- $\beta$ N3                    | -340.14 | -9.154  | -6.54 | -17.28 | -0.22 | -36.47 | -53.75 | -80.43  |
| Man- $\alpha$ 1,4-Gal- $\beta$ N3                    | -339.90 | -9.467  | -6.95 | -15.20 | -0.21 | -37.87 | -53.07 | -71.51  |
| Man- $\alpha$ 1,4-Gal- $\beta$ N3                    | -339.14 | -8.332  | -5.83 | -16.84 | -0.21 | -36.86 | -53.70 | -75.34  |
| Man- $\alpha$ 1,6-Gal- $\beta$ N3                    | -341.00 | -10.059 | -7.36 | -23.57 | 0.00  | -37.18 | -60.75 | -84.12  |
| Man- $\alpha$ 1,6-Gal- $\beta$ N3                    | -340.65 | -9.179  | -5.88 | -20.96 | -0.13 | -38.71 | -59.67 | -95.04  |
| Man- $\alpha$ 1,6-Gal- $\beta$ N3                    | -340.54 | -9.329  | -6.85 | -16.80 | -0.50 | -41.08 | -57.88 | -83.85  |
| Man- $\alpha$ 1,6-Gal- $\beta$ N3                    | -340.52 | -9.207  | -6.45 | -18.19 | -0.26 | -33.52 | -51.70 | -83.49  |
| Man- $\alpha$ 1,6-Gal- $\beta$ N3                    | -340.52 | -9.245  | -6.67 | -17.89 | -0.04 | -35.21 | -53.11 | -78.04  |
| Man- $\alpha$ 1,6-Gal- $\beta$ N3                    | -340.44 | -8.919  | -6.14 | -16.80 | -0.15 | -35.95 | -52.75 | -87.62  |
| Man- $\alpha$ 1,6-Gal- $\beta$ N3                    | -340.44 | -9.221  | -6.70 | -18.01 | -0.04 | -38.93 | -56.94 | -80.62  |
| Man- $\alpha$ 1,6-Gal- $\beta$ N3                    | -340.35 | -8.893  | -5.86 | -20.97 | -0.12 | -32.59 | -53.57 | -80.39  |
| Man- $\alpha$ 1,6-Gal- $\beta$ N3                    | -340.31 | -9.124  | -6.58 | -18.35 | -0.04 | -34.99 | -53.34 | -78.55  |
| Man- $\alpha$ 1,6-Gal- $\beta$ N3                    | -340.27 | -8.940  | -5.89 | -21.35 | -0.50 | -32.90 | -54.25 | -84.91  |
| Man- $\alpha$ 1,6-Gal- $\beta$ N3                    | -340.26 | -9.283  | -6.74 | -18.60 | -0.05 | -39.49 | -58.08 | -82.91  |
| Man- $\alpha$ 1,6-Gal- $\beta$ N3                    | -340.26 | -8.921  | -5.96 | -19.24 | -0.09 | -33.19 | -52.42 | -75.72  |
| Man- $\alpha$ 1,6-Gal- $\beta$ N3                    | -340.16 | -8.937  | -6.18 | -16.20 | -0.01 | -38.64 | -54.85 | -85.03  |
| Man- $\alpha$ 1,6-Gal- $\beta$ N3                    | -339.92 | -8.811  | -5.82 | -20.39 | -0.05 | -34.15 | -54.54 | -78.82  |
| Man- $\alpha$ 1,6-Gal- $\beta$ N3                    | -339.89 | -8.848  | -6.45 | -15.01 | -0.35 | -37.69 | -52.70 | -74.77  |
| Man- $\alpha$ 1,6-Gal- $\beta$ N3                    | -339.81 | -8.504  | -5.73 | -17.96 | -0.34 | -37.84 | -55.80 | -85.11  |
| Man- $\alpha$ 1,6-Gal- $\beta$ N3                    | -339.68 | -8.318  | -5.43 | -13.99 | -0.07 | -40.30 | -54.29 | -79.14  |
| Man- $\alpha$ 1,6-Gal- $\beta$ N3                    | -339.63 | -8.614  | -5.84 | -16.19 | 0.00  | -37.15 | -53.35 | -82.01  |
| Man- $\alpha$ 1,6-Gal- $\beta$ N3                    | -339.58 | -8.360  | -5.50 | -18.11 | -0.34 | -39.95 | -58.06 | -94.94  |
| Man- $\alpha$ 1,4-[Glc- $\beta$ 1,6]-Gal- $\beta$ N3 | -343.57 | -12.437 | -9.20 | -25.21 | -0.32 | -39.00 | -64.21 | -108.11 |
| Man- $\alpha$ 1,4-[Glc- $\beta$ 1,6]-Gal- $\beta$ N3 | -343.53 | -12.314 | -9.44 | -24.27 | -0.34 | -45.37 | -69.64 | -107.18 |
| Man- $\alpha$ 1,4-[Glc- $\beta$ 1,6]-Gal- $\beta$ N3 | -343.13 | -12.078 | -9.08 | -25.18 | -0.28 | -34.97 | -60.15 | -91.71  |
| Man- $\alpha$ 1,4-[Glc- $\beta$ 1,6]-Gal- $\beta$ N3 | -342.86 | -11.289 | -8.49 | -22.85 | -0.26 | -44.52 | -67.37 | -100.99 |
| Man- $\alpha$ 1,4-[Glc- $\beta$ 1,6]-Gal- $\beta$ N3 | -342.86 | -11.824 | -8.90 | -23.28 | -0.33 | -45.67 | -68.95 | -97.15  |
| Man- $\alpha$ 1,4-[Glc- $\beta$ 1,6]-Gal- $\beta$ N3 | -342.85 | -11.542 | -8.50 | -27.60 | -0.25 | -39.41 | -67.01 | -99.31  |
| Man- $\alpha$ 1,4-[Glc- $\beta$ 1,6]-Gal- $\beta$ N3 | -342.82 | -11.491 | -8.45 | -26.11 | -0.26 | -39.03 | -65.15 | -100.49 |
| Man- $\alpha$ 1,4-[Glc- $\beta$ 1,6]-Gal- $\beta$ N3 | -342.79 | -11.270 | -8.45 | -21.57 | -0.18 | -43.99 | -65.56 | -95.61  |
| Man- $\alpha$ 1,4-[Glc- $\beta$ 1,6]-Gal- $\beta$ N3 | -342.51 | -11.237 | -8.37 | -18.81 | -0.27 | -42.18 | -60.99 | -103.59 |

|                                                       |         |         |       |        |       |        |        |         |
|-------------------------------------------------------|---------|---------|-------|--------|-------|--------|--------|---------|
| Man- $\alpha$ 1,4-[Glc- $\beta$ 1,6]-Gal- $\beta$ N3  | -342.08 | -10.983 | -8.15 | -27.14 | -0.26 | -34.29 | -61.44 | -87.72  |
| Man- $\alpha$ 1,4-[Glc- $\beta$ 1,6]-Gal- $\beta$ N3  | -342.00 | -10.794 | -7.93 | -25.71 | -0.27 | -43.43 | -69.14 | -96.14  |
| Man- $\alpha$ 1,4-[Glc- $\beta$ 1,6]-Gal- $\beta$ N3  | -341.98 | -10.511 | -7.83 | -18.73 | -0.23 | -38.09 | -56.82 | -95.15  |
| Man- $\alpha$ 1,4-[Glc- $\beta$ 1,6]-Gal- $\beta$ N3  | -341.95 | -10.811 | -7.94 | -23.70 | -0.34 | -34.69 | -58.39 | -87.40  |
| Man- $\alpha$ 1,4-[Glc- $\beta$ 1,6]-Gal- $\beta$ N3  | -341.84 | -10.877 | -8.35 | -19.98 | -0.35 | -45.83 | -65.81 | -104.18 |
| Man- $\alpha$ 1,4-[Glc- $\beta$ 1,6]-Gal- $\beta$ N3  | -341.81 | -11.154 | -8.08 | -24.82 | -0.25 | -40.81 | -65.63 | -94.36  |
| Man- $\alpha$ 1,4-[Glc- $\beta$ 1,6]-Gal- $\beta$ N3  | -341.70 | -10.676 | -7.79 | -23.63 | -0.30 | -44.50 | -68.13 | -97.61  |
| Man- $\alpha$ 1,4-[Glc- $\beta$ 1,6]-Gal- $\beta$ N3  | -341.58 | -10.079 | -7.56 | -19.15 | -0.30 | -38.85 | -58.00 | -88.12  |
| Man- $\alpha$ 1,4-[Glc- $\beta$ 1,6]-Gal- $\beta$ N3  | -341.40 | -10.615 | -7.62 | -24.78 | -0.30 | -38.21 | -62.99 | -95.50  |
| Man- $\alpha$ 1,4-[Glc- $\beta$ 1,6]-Gal- $\beta$ N3  | -341.37 | -10.344 | -7.61 | -25.48 | -0.28 | -38.45 | -63.93 | -86.48  |
| Man- $\alpha$ 1,4-[Glc- $\beta$ 1,6]-Gal- $\beta$ N3  | -340.70 | -9.684  | -7.15 | -19.82 | -0.28 | -42.40 | -62.23 | -85.50  |
| Glc- $\beta$ 1,4-[Man- $\alpha$ 1,6]-Gal- $\beta$ N3  | -342.66 | -11.042 | -8.22 | -22.50 | -0.46 | -38.25 | -60.75 | -93.05  |
| Glc- $\beta$ 1,4-[Man- $\alpha$ 1,6]-Gal- $\beta$ N3  | -342.41 | -10.544 | -7.64 | -21.30 | -0.14 | -40.11 | -61.41 | -89.85  |
| Glc- $\beta$ 1,4-[Man- $\alpha$ 1,6]-Gal- $\beta$ N3  | -342.35 | -10.314 | -7.42 | -22.83 | -0.39 | -47.57 | -70.40 | -108.69 |
| Glc- $\beta$ 1,4-[Man- $\alpha$ 1,6]-Gal- $\beta$ N3  | -342.28 | -10.411 | -7.54 | -22.04 | -0.30 | -46.80 | -68.84 | -98.46  |
| Glc- $\beta$ 1,4-[Man- $\alpha$ 1,6]-Gal- $\beta$ N3  | -342.19 | -10.791 | -8.09 | -18.09 | -0.46 | -38.56 | -56.65 | -88.75  |
| Glc- $\beta$ 1,4-[Man- $\alpha$ 1,6]-Gal- $\beta$ N3  | -342.16 | -10.304 | -7.52 | -19.88 | -0.47 | -43.87 | -63.75 | -92.94  |
| Glc- $\beta$ 1,4-[Man- $\alpha$ 1,6]-Gal- $\beta$ N3  | -341.83 | -10.429 | -7.40 | -20.00 | -0.17 | -42.75 | -62.74 | -100.29 |
| Glc- $\beta$ 1,4-[Man- $\alpha$ 1,6]-Gal- $\beta$ N3  | -341.72 | -9.890  | -7.07 | -20.93 | -0.21 | -44.07 | -64.99 | -98.45  |
| Glc- $\beta$ 1,4-[Man- $\alpha$ 1,6]-Gal- $\beta$ N3  | -341.70 | -9.963  | -7.06 | -22.47 | -0.53 | -39.80 | -62.26 | -93.20  |
| Glc- $\beta$ 1,4-[Man- $\alpha$ 1,6]-Gal- $\beta$ N3  | -341.70 | -10.386 | -7.45 | -23.83 | -0.21 | -39.01 | -62.83 | -89.57  |
| Glc- $\beta$ 1,4-[Man- $\alpha$ 1,6]-Gal- $\beta$ N3  | -341.62 | -9.724  | -6.58 | -23.66 | -0.34 | -37.43 | -61.09 | -90.91  |
| Glc- $\beta$ 1,4-[Man- $\alpha$ 1,6]-Gal- $\beta$ N3  | -341.56 | -10.424 | -7.98 | -17.59 | -0.06 | -44.31 | -61.90 | -91.96  |
| Glc- $\beta$ 1,4-[Man- $\alpha$ 1,6]-Gal- $\beta$ N3  | -341.53 | -10.125 | -7.28 | -24.43 | -0.06 | -37.14 | -61.57 | -90.54  |
| Glc- $\beta$ 1,4-[Man- $\alpha$ 1,6]-Gal- $\beta$ N3  | -341.31 | -10.195 | -7.35 | -20.88 | -0.33 | -39.40 | -60.28 | -96.88  |
| Glc- $\beta$ 1,4-[Man- $\alpha$ 1,6]-Gal- $\beta$ N3  | -341.15 | -9.417  | -6.07 | -26.31 | -0.31 | -35.98 | -62.30 | -88.16  |
| Glc- $\beta$ 1,4-[Man- $\alpha$ 1,6]-Gal- $\beta$ N3  | -340.95 | -9.126  | -6.12 | -26.26 | -0.40 | -34.79 | -61.05 | -87.84  |
| Glc- $\beta$ 1,4-[Man- $\alpha$ 1,6]-Gal- $\beta$ N3  | -340.91 | -9.542  | -7.11 | -15.13 | -0.44 | -42.16 | -57.29 | -81.51  |
| Glc- $\beta$ 1,4-[Man- $\alpha$ 1,6]-Gal- $\beta$ N3  | -340.40 | -9.345  | -6.44 | -26.07 | -0.46 | -34.94 | -61.02 | -89.51  |
| Glc- $\beta$ 1,4-[Man- $\alpha$ 1,6]-Gal- $\beta$ N3  | -340.04 | -9.323  | -6.36 | -27.08 | -0.40 | -36.71 | -63.79 | -83.46  |
| Man- $\alpha$ 1,4-[Man- $\alpha$ 1,6]-Gal- $\beta$ N3 | -343.99 | -12.703 | -8.93 | -20.75 | -0.21 | -43.29 | -64.04 | -99.79  |
| Man- $\alpha$ 1,4-[Man- $\alpha$ 1,6]-Gal- $\beta$ N3 | -342.26 | -10.662 | -8.05 | -18.30 | -0.21 | -43.90 | -62.20 | -98.03  |
| Man- $\alpha$ 1,4-[Man- $\alpha$ 1,6]-Gal- $\beta$ N3 | -342.24 | -11.154 | -8.64 | -19.92 | -0.22 | -39.82 | -59.74 | -102.20 |
| Man- $\alpha$ 1,4-[Man- $\alpha$ 1,6]-Gal- $\beta$ N3 | -342.09 | -10.754 | -7.87 | -27.92 | -0.18 | -35.03 | -62.95 | -95.98  |
| Man- $\alpha$ 1,4-[Man- $\alpha$ 1,6]-Gal- $\beta$ N3 | -341.83 | -10.811 | -7.77 | -19.58 | -0.19 | -41.14 | -60.72 | -100.57 |
| Man- $\alpha$ 1,4-[Man- $\alpha$ 1,6]-Gal- $\beta$ N3 | -341.80 | -10.519 | -7.68 | -18.29 | -0.24 | -38.76 | -57.04 | -98.47  |
| Man- $\alpha$ 1,4-[Man- $\alpha$ 1,6]-Gal- $\beta$ N3 | -341.66 | -10.041 | -7.22 | -21.69 | -0.19 | -38.21 | -59.90 | -95.71  |
| Man- $\alpha$ 1,4-[Man- $\alpha$ 1,6]-Gal- $\beta$ N3 | -341.34 | -10.102 | -7.56 | -18.84 | -0.02 | -41.58 | -60.42 | -85.93  |
| Man- $\alpha$ 1,4-[Man- $\alpha$ 1,6]-Gal- $\beta$ N3 | -341.20 | -9.970  | -7.17 | -23.27 | -0.02 | -33.60 | -56.88 | -91.59  |
| Man- $\alpha$ 1,4-[Man- $\alpha$ 1,6]-Gal- $\beta$ N3 | -341.08 | -9.413  | -6.72 | -23.74 | -0.25 | -34.71 | -58.45 | -95.50  |
| Man- $\alpha$ 1,4-[Man- $\alpha$ 1,6]-Gal- $\beta$ N3 | -341.08 | -9.540  | -7.05 | -21.30 | -0.27 | -40.98 | -62.28 | -88.00  |
| Man- $\alpha$ 1,4-[Man- $\alpha$ 1,6]-Gal- $\beta$ N3 | -340.97 | -9.895  | -7.40 | -15.33 | -0.19 | -43.76 | -59.09 | -103.29 |
| Man- $\alpha$ 1,4-[Man- $\alpha$ 1,6]-Gal- $\beta$ N3 | -340.97 | -9.929  | -7.06 | -27.05 | -0.21 | -31.84 | -58.90 | -97.44  |
| Man- $\alpha$ 1,4-[Man- $\alpha$ 1,6]-Gal- $\beta$ N3 | -340.91 | -9.742  | -7.48 | -14.60 | -0.22 | -43.83 | -58.42 | -95.88  |

|                                                       |         |         |       |        |       |        |        |         |
|-------------------------------------------------------|---------|---------|-------|--------|-------|--------|--------|---------|
| Man- $\alpha$ 1,4-[Man- $\alpha$ 1,6]-Gal- $\beta$ N3 | -340.90 | -9.799  | -7.58 | -11.27 | -0.02 | -44.34 | -55.61 | -83.03  |
| Man- $\alpha$ 1,4-[Man- $\alpha$ 1,6]-Gal- $\beta$ N3 | -340.77 | -9.793  | -7.46 | -14.66 | -0.14 | -43.10 | -57.76 | -99.86  |
| Man- $\alpha$ 1,4-[Man- $\alpha$ 1,6]-Gal- $\beta$ N3 | -340.72 | -9.685  | -7.45 | -14.81 | -0.02 | -41.73 | -56.54 | -94.05  |
| Man- $\alpha$ 1,4-[Man- $\alpha$ 1,6]-Gal- $\beta$ N3 | -340.70 | -9.499  | -6.96 | -16.67 | -0.20 | -39.07 | -55.74 | -96.28  |
| Man- $\alpha$ 1,4-[Man- $\alpha$ 1,6]-Gal- $\beta$ N3 | -340.64 | -9.425  | -6.78 | -19.18 | -0.19 | -39.34 | -58.53 | -97.48  |
| Man- $\alpha$ 1,4-[Man- $\alpha$ 1,6]-Gal- $\beta$ N3 | -340.56 | -9.437  | -7.19 | -16.40 | -0.16 | -40.36 | -56.76 | -92.80  |
| Glc- $\alpha$ 1,4-[Man- $\alpha$ 1,6]-Glc- $\beta$ N3 | -342.49 | -10.838 | -7.64 | -18.90 | -0.25 | -49.09 | -67.99 | -114.86 |
| Glc- $\alpha$ 1,4-[Man- $\alpha$ 1,6]-Glc- $\beta$ N3 | -342.40 | -10.785 | -6.85 | -23.21 | -0.15 | -48.13 | -71.34 | -110.84 |
| Glc- $\alpha$ 1,4-[Man- $\alpha$ 1,6]-Glc- $\beta$ N3 | -342.16 | -10.364 | -6.76 | -28.26 | -0.28 | -32.88 | -61.14 | -81.24  |
| Glc- $\alpha$ 1,4-[Man- $\alpha$ 1,6]-Glc- $\beta$ N3 | -342.07 | -10.678 | -5.32 | -23.38 | -0.54 | -32.33 | -55.71 | -91.42  |
| Glc- $\alpha$ 1,4-[Man- $\alpha$ 1,6]-Glc- $\beta$ N3 | -341.62 | -9.923  | -5.92 | -26.18 | -0.31 | -30.97 | -57.15 | -82.17  |
| Glc- $\alpha$ 1,4-[Man- $\alpha$ 1,6]-Glc- $\beta$ N3 | -341.62 | -10.033 | -5.88 | -27.61 | -0.43 | -29.50 | -57.11 | -83.44  |
| Glc- $\alpha$ 1,4-[Man- $\alpha$ 1,6]-Glc- $\beta$ N3 | -341.46 | -9.924  | -6.51 | -20.19 | -0.27 | -41.20 | -61.39 | -94.00  |
| Glc- $\alpha$ 1,4-[Man- $\alpha$ 1,6]-Glc- $\beta$ N3 | -341.33 | -9.676  | -5.92 | -28.88 | -0.37 | -28.68 | -57.56 | -84.06  |
| Glc- $\alpha$ 1,4-[Man- $\alpha$ 1,6]-Glc- $\beta$ N3 | -341.30 | -9.983  | -5.84 | -21.80 | -0.43 | -37.52 | -59.33 | -87.49  |
| Glc- $\alpha$ 1,4-[Man- $\alpha$ 1,6]-Glc- $\beta$ N3 | -341.23 | -9.588  | -5.59 | -27.22 | -0.56 | -30.80 | -58.02 | -85.92  |
| Glc- $\alpha$ 1,4-[Man- $\alpha$ 1,6]-Glc- $\beta$ N3 | -341.22 | -9.517  | -6.06 | -27.25 | -0.24 | -30.26 | -57.52 | -81.10  |
| Glc- $\alpha$ 1,4-[Man- $\alpha$ 1,6]-Glc- $\beta$ N3 | -341.21 | -9.523  | -5.93 | -25.03 | -0.63 | -27.14 | -52.17 | -80.18  |
| Glc- $\alpha$ 1,4-[Man- $\alpha$ 1,6]-Glc- $\beta$ N3 | -341.21 | -9.863  | -5.56 | -29.30 | -0.40 | -30.15 | -59.46 | -85.26  |
| Glc- $\alpha$ 1,4-[Man- $\alpha$ 1,6]-Glc- $\beta$ N3 | -341.13 | -9.863  | -5.76 | -20.88 | -0.46 | -34.44 | -55.31 | -87.37  |
| Glc- $\alpha$ 1,4-[Man- $\alpha$ 1,6]-Glc- $\beta$ N3 | -341.10 | -9.410  | -5.98 | -26.88 | -0.66 | -31.90 | -58.78 | -79.69  |
| Glc- $\alpha$ 1,4-[Man- $\alpha$ 1,6]-Glc- $\beta$ N3 | -341.10 | -9.452  | -6.22 | -26.42 | -0.43 | -28.95 | -55.38 | -82.36  |
| Glc- $\alpha$ 1,4-[Man- $\alpha$ 1,6]-Glc- $\beta$ N3 | -340.81 | -9.569  | -5.62 | -27.01 | -0.46 | -35.00 | -62.00 | -89.62  |
| Glc- $\alpha$ 1,4-[Man- $\alpha$ 1,6]-Glc- $\beta$ N3 | -340.71 | -9.127  | -5.87 | -28.40 | -0.41 | -35.32 | -63.71 | -90.06  |
| Glc- $\alpha$ 1,4-[Man- $\alpha$ 1,6]-Glc- $\beta$ N3 | -340.55 | -9.708  | -7.12 | -12.29 | -0.62 | -34.06 | -46.35 | -85.61  |
| Glc- $\alpha$ 1,4-[Man- $\alpha$ 1,6]-Glc- $\beta$ N3 | -340.40 | -9.251  | -5.06 | -25.25 | -0.49 | -31.86 | -57.10 | -89.36  |
| Glc- $\beta$ 1,3-[Man- $\alpha$ 1,6]-Glc- $\beta$ N3  | -343.11 | -11.103 | -6.91 | -9.73  | -0.36 | -42.45 | -52.18 | -96.19  |
| Glc- $\beta$ 1,3-[Man- $\alpha$ 1,6]-Glc- $\beta$ N3  | -343.05 | -10.850 | -7.99 | -17.73 | -0.37 | -49.06 | -66.78 | -101.98 |
| Glc- $\beta$ 1,3-[Man- $\alpha$ 1,6]-Glc- $\beta$ N3  | -342.90 | -10.863 | -6.90 | -16.86 | -0.24 | -40.43 | -57.29 | -97.73  |
| Glc- $\beta$ 1,3-[Man- $\alpha$ 1,6]-Glc- $\beta$ N3  | -342.44 | -10.330 | -7.46 | -22.12 | -0.38 | -35.70 | -57.82 | -96.93  |
| Glc- $\beta$ 1,3-[Man- $\alpha$ 1,6]-Glc- $\beta$ N3  | -342.32 | -10.635 | -6.90 | -18.52 | -0.11 | -34.56 | -53.08 | -89.78  |
| Glc- $\beta$ 1,3-[Man- $\alpha$ 1,6]-Glc- $\beta$ N3  | -342.14 | -10.280 | -7.36 | -17.40 | -0.07 | -38.12 | -55.51 | -91.82  |
| Glc- $\beta$ 1,3-[Man- $\alpha$ 1,6]-Glc- $\beta$ N3  | -342.02 | -10.014 | -6.42 | -14.59 | -0.09 | -40.15 | -54.73 | -97.13  |
| Glc- $\beta$ 1,3-[Man- $\alpha$ 1,6]-Glc- $\beta$ N3  | -341.90 | -10.555 | -7.05 | -22.20 | -0.27 | -37.47 | -59.67 | -96.43  |
| Glc- $\beta$ 1,3-[Man- $\alpha$ 1,6]-Glc- $\beta$ N3  | -341.90 | -10.264 | -7.42 | -18.02 | -0.18 | -40.84 | -58.86 | -95.29  |
| Glc- $\beta$ 1,3-[Man- $\alpha$ 1,6]-Glc- $\beta$ N3  | -341.87 | -10.420 | -8.16 | -7.00  | -0.20 | -45.25 | -52.26 | -87.75  |
| Glc- $\beta$ 1,3-[Man- $\alpha$ 1,6]-Glc- $\beta$ N3  | -341.84 | -10.159 | -6.86 | -23.93 | -0.21 | -40.19 | -64.12 | -103.12 |
| Glc- $\beta$ 1,3-[Man- $\alpha$ 1,6]-Glc- $\beta$ N3  | -341.76 | -9.873  | -5.62 | -13.16 | -0.36 | -41.49 | -54.66 | -96.18  |
| Glc- $\beta$ 1,3-[Man- $\alpha$ 1,6]-Glc- $\beta$ N3  | -341.62 | -10.024 | -6.96 | -21.33 | -0.43 | -45.30 | -66.63 | -99.99  |
| Glc- $\beta$ 1,3-[Man- $\alpha$ 1,6]-Glc- $\beta$ N3  | -341.60 | -9.877  | -7.07 | -21.40 | -0.33 | -45.67 | -67.08 | -98.30  |
| Glc- $\beta$ 1,3-[Man- $\alpha$ 1,6]-Glc- $\beta$ N3  | -341.48 | -10.124 | -7.26 | -14.36 | -0.10 | -40.10 | -54.46 | -96.97  |
| Glc- $\beta$ 1,3-[Man- $\alpha$ 1,6]-Glc- $\beta$ N3  | -341.40 | -10.260 | -5.83 | -13.57 | -0.12 | -37.60 | -51.17 | -89.13  |
| Glc- $\beta$ 1,3-[Man- $\alpha$ 1,6]-Glc- $\beta$ N3  | -341.38 | -9.848  | -6.50 | -19.61 | -0.35 | -43.72 | -63.33 | -90.48  |
| Glc- $\beta$ 1,3-[Man- $\alpha$ 1,6]-Glc- $\beta$ N3  | -341.28 | -9.590  | -6.65 | -18.26 | -0.15 | -39.20 | -57.45 | -92.36  |

|                               |         |         |        |        |       |        |        |         |
|-------------------------------|---------|---------|--------|--------|-------|--------|--------|---------|
| Glc-β1,3-[Man-α1,6]-Glc-βN3   | -341.08 | -9.889  | -6.98  | -14.78 | -0.11 | -40.90 | -55.68 | -105.08 |
| Glc-β1,3-[Man-α1,6]-Glc-βN3   | -340.20 | -8.926  | -5.85  | -21.65 | -0.30 | -31.39 | -53.04 | -90.17  |
| Man-α1,3-[Man-α1,6]-Man-βN3   | -342.77 | -12.256 | -10.10 | -18.23 | 0.00  | -56.30 | -74.53 | -118.94 |
| Man-α1,3-[Man-α1,6]-Man-βN3   | -342.76 | -12.119 | -10.09 | -14.93 | 0.00  | -57.73 | -72.66 | -112.45 |
| Man-α1,3-[Man-α1,6]-Man-βN3   | -342.72 | -11.061 | -8.08  | -24.08 | -0.19 | -39.14 | -63.22 | -91.00  |
| Man-α1,3-[Man-α1,6]-Man-βN3   | -342.59 | -11.580 | -8.55  | -23.38 | -0.18 | -40.02 | -63.40 | -96.63  |
| Man-α1,3-[Man-α1,6]-Man-βN3   | -342.45 | -11.880 | -10.07 | -9.68  | 0.00  | -58.45 | -68.13 | -114.82 |
| Man-α1,3-[Man-α1,6]-Man-βN3   | -342.34 | -11.272 | -8.30  | -28.33 | -0.24 | -39.76 | -68.09 | -110.26 |
| Man-α1,3-[Man-α1,6]-Man-βN3   | -342.26 | -10.510 | -8.36  | -18.25 | -0.18 | -44.37 | -62.63 | -96.66  |
| Man-α1,3-[Man-α1,6]-Man-βN3   | -342.23 | -10.554 | -8.22  | -18.31 | -0.24 | -37.29 | -55.60 | -95.94  |
| Man-α1,3-[Man-α1,6]-Man-βN3   | -342.10 | -10.610 | -8.30  | -20.60 | -0.19 | -37.97 | -58.58 | -91.24  |
| Man-α1,3-[Man-α1,6]-Man-βN3   | -342.00 | -10.288 | -7.73  | -14.80 | -0.14 | -38.94 | -53.73 | -92.27  |
| Man-α1,3-[Man-α1,6]-Man-βN3   | -341.83 | -10.852 | -7.97  | -19.72 | -0.18 | -44.92 | -64.65 | -94.87  |
| Man-α1,3-[Man-α1,6]-Man-βN3   | -341.74 | -10.317 | -8.06  | -20.58 | -0.18 | -42.33 | -62.92 | -90.12  |
| Man-α1,3-[Man-α1,6]-Man-βN3   | -341.73 | -11.151 | -7.96  | -24.01 | -0.16 | -40.93 | -64.94 | -99.85  |
| Man-α1,3-[Man-α1,6]-Man-βN3   | -341.58 | -9.790  | -7.60  | -14.82 | -0.11 | -42.15 | -56.97 | -97.79  |
| Man-α1,3-[Man-α1,6]-Man-βN3   | -341.56 | -10.282 | -8.19  | -16.44 | -0.19 | -41.33 | -57.77 | -92.07  |
| Man-α1,3-[Man-α1,6]-Man-βN3   | -341.28 | -10.113 | -7.80  | -17.77 | -0.20 | -43.57 | -61.34 | -90.41  |
| Man-α1,3-[Man-α1,6]-Man-βN3   | -341.01 | -10.219 | -7.64  | -21.80 | -0.20 | -37.54 | -59.34 | -91.40  |
| Man-α1,3-[Man-α1,6]-Man-βN3   | -340.96 | -10.349 | -7.69  | -22.59 | -0.25 | -38.26 | -60.85 | -84.03  |
| Man-α1,3-[Man-α1,6]-Man-βN3   | -340.93 | -10.460 | -7.36  | -28.08 | -0.10 | -36.67 | -64.75 | -91.15  |
| Man-α1,3-[Man-α1,6]-Man-βN3   | -340.68 | -10.375 | -7.20  | -23.18 | -0.29 | -40.72 | -63.90 | -95.63  |
| Man-α1,4-[Glc-β1,6]-Glc-βProp | -343.29 | -11.520 | -7.66  | -30.30 | -0.42 | -41.26 | -71.56 | -107.84 |
| Man-α1,4-[Glc-β1,6]-Glc-βProp | -343.06 | -11.200 | -7.69  | -26.46 | -0.42 | -39.93 | -66.39 | -99.02  |
| Man-α1,4-[Glc-β1,6]-Glc-βProp | -343.05 | -11.175 | -8.07  | -22.91 | -0.58 | -37.41 | -60.32 | -98.37  |
| Man-α1,4-[Glc-β1,6]-Glc-βProp | -343.03 | -11.338 | -7.66  | -29.50 | -0.46 | -38.78 | -68.28 | -101.89 |
| Man-α1,4-[Glc-β1,6]-Glc-βProp | -342.93 | -11.354 | -7.58  | -27.91 | -0.31 | -39.00 | -66.91 | -97.50  |
| Man-α1,4-[Glc-β1,6]-Glc-βProp | -342.93 | -11.235 | -7.41  | -29.13 | -0.28 | -37.24 | -66.37 | -100.04 |
| Man-α1,4-[Glc-β1,6]-Glc-βProp | -342.69 | -11.130 | -7.74  | -25.84 | -0.35 | -41.76 | -67.60 | -97.00  |
| Man-α1,4-[Glc-β1,6]-Glc-βProp | -342.68 | -11.096 | -7.56  | -23.93 | -0.47 | -36.11 | -60.04 | -91.22  |
| Man-α1,4-[Glc-β1,6]-Glc-βProp | -342.66 | -10.931 | -7.69  | -23.53 | -0.61 | -38.83 | -62.35 | -93.91  |
| Man-α1,4-[Glc-β1,6]-Glc-βProp | -342.62 | -11.093 | -7.48  | -25.18 | -0.21 | -39.72 | -64.90 | -92.81  |
| Man-α1,4-[Glc-β1,6]-Glc-βProp | -342.57 | -10.627 | -7.65  | -21.54 | -0.45 | -41.05 | -62.59 | -97.78  |
| Man-α1,4-[Glc-β1,6]-Glc-βProp | -342.41 | -10.643 | -7.64  | -21.17 | -0.21 | -39.30 | -60.47 | -91.64  |
| Man-α1,4-[Glc-β1,6]-Glc-βProp | -342.40 | -10.467 | -7.43  | -21.78 | -0.41 | -40.94 | -62.73 | -88.19  |
| Man-α1,4-[Glc-β1,6]-Glc-βProp | -341.93 | -10.479 | -7.66  | -19.77 | -0.29 | -42.27 | -62.04 | -95.66  |
| Man-α1,4-[Glc-β1,6]-Glc-βProp | -341.92 | -9.730  | -7.35  | -16.45 | -0.57 | -41.78 | -58.24 | -90.85  |
| Man-α1,4-[Glc-β1,6]-Glc-βProp | -341.90 | -10.468 | -7.03  | -26.05 | -0.15 | -34.68 | -60.73 | -86.16  |
| Man-α1,4-[Glc-β1,6]-Glc-βProp | -341.82 | -9.973  | -6.91  | -23.21 | -0.52 | -30.94 | -54.15 | -82.75  |
| Man-α1,4-[Glc-β1,6]-Glc-βProp | -341.81 | -9.791  | -6.79  | -18.48 | -0.62 | -42.21 | -60.69 | -90.57  |
| Glc-β1,4-[Man-α1,6]-Glc-βProp | -343.55 | -11.484 | -8.14  | -26.43 | -0.13 | -42.71 | -69.13 | -99.49  |
| Glc-β1,4-[Man-α1,6]-Glc-βProp | -343.34 | -11.535 | -7.96  | -28.96 | -0.12 | -42.45 | -71.41 | -96.23  |
| Glc-β1,4-[Man-α1,6]-Glc-βProp | -343.13 | -11.045 | -7.32  | -28.94 | -0.08 | -40.63 | -69.57 | -103.43 |
| Glc-β1,4-[Man-α1,6]-Glc-βProp | -343.07 | -11.058 | -8.29  | -19.28 | -0.58 | -45.14 | -64.43 | -102.10 |

|                                                        |         |         |       |        |       |        |        |         |
|--------------------------------------------------------|---------|---------|-------|--------|-------|--------|--------|---------|
| Glc- $\beta$ 1,4-[Man- $\alpha$ 1,6]-Glc- $\beta$ Prop | -343.05 | -11.398 | -7.63 | -31.29 | -0.04 | -39.97 | -71.27 | -105.47 |
| Glc- $\beta$ 1,4-[Man- $\alpha$ 1,6]-Glc- $\beta$ Prop | -342.49 | -9.911  | -6.84 | -23.16 | -0.19 | -38.61 | -61.76 | -87.32  |
| Glc- $\beta$ 1,4-[Man- $\alpha$ 1,6]-Glc- $\beta$ Prop | -342.32 | -10.702 | -6.61 | -23.98 | -0.47 | -37.24 | -61.22 | -106.56 |
| Glc- $\beta$ 1,4-[Man- $\alpha$ 1,6]-Glc- $\beta$ Prop | -342.26 | -10.624 | -6.58 | -23.33 | -0.43 | -38.02 | -61.35 | -101.86 |
| Glc- $\beta$ 1,4-[Man- $\alpha$ 1,6]-Glc- $\beta$ Prop | -342.24 | -10.355 | -7.11 | -25.46 | -0.20 | -39.13 | -64.59 | -97.80  |
| Glc- $\beta$ 1,4-[Man- $\alpha$ 1,6]-Glc- $\beta$ Prop | -342.17 | -10.331 | -6.90 | -23.82 | -0.04 | -42.52 | -66.34 | -111.25 |
| Glc- $\beta$ 1,4-[Man- $\alpha$ 1,6]-Glc- $\beta$ Prop | -342.08 | -10.174 | -7.31 | -22.87 | -0.17 | -36.45 | -59.32 | -92.74  |
| Glc- $\beta$ 1,4-[Man- $\alpha$ 1,6]-Glc- $\beta$ Prop | -341.98 | -9.861  | -7.00 | -23.44 | -0.42 | -39.81 | -63.25 | -90.45  |
| Glc- $\beta$ 1,4-[Man- $\alpha$ 1,6]-Glc- $\beta$ Prop | -341.77 | -10.430 | -7.46 | -21.87 | -0.18 | -43.88 | -65.75 | -90.65  |
| Glc- $\beta$ 1,4-[Man- $\alpha$ 1,6]-Glc- $\beta$ Prop | -341.59 | -9.632  | -6.98 | -21.74 | -0.04 | -37.63 | -59.37 | -90.30  |
| Glc- $\beta$ 1,4-[Man- $\alpha$ 1,6]-Glc- $\beta$ Prop | -341.54 | -9.753  | -5.81 | -25.06 | -0.32 | -35.92 | -60.98 | -93.10  |
| Glc- $\beta$ 1,4-[Man- $\alpha$ 1,6]-Glc- $\beta$ Prop | -341.50 | -9.790  | -7.40 | -17.12 | -0.36 | -39.10 | -56.22 | -82.19  |
| Glc- $\beta$ 1,4-[Man- $\alpha$ 1,6]-Glc- $\beta$ Prop | -341.45 | -9.419  | -6.58 | -20.26 | -0.25 | -40.01 | -60.27 | -88.05  |

**Table S11.** Scoring values of binding pose metadynamics calculation for the top five scoring binding poses from IFD. A lower composite (comp.) score correlates to a more stable protein-ligand complex.

| Glycan                                                | IFD Score | Comp. Score | Pose Score | Persistence | Persistence Length | Persistence Sum | HBond Persistence | HBond Persistence Length | HBond Persistence Sum |
|-------------------------------------------------------|-----------|-------------|------------|-------------|--------------------|-----------------|-------------------|--------------------------|-----------------------|
| Man- $\alpha$ 1,4-Glc- $\beta$ N3                     | -341.27   | -2.707      | 1.395      | 0.820       | 8.000              | 6.564           | 0.820             | 8.000                    | 6.564                 |
| Man- $\alpha$ 1,4-Glc- $\beta$ N3                     | -341.39   | -2.580      | 1.550      | 0.826       | 8.000              | 6.609           | 0.826             | 8.000                    | 6.609                 |
| Man- $\alpha$ 1,4-Glc- $\beta$ N3                     | -341.37   | -2.525      | 1.498      | 0.805       | 8.000              | 6.436           | 0.805             | 8.000                    | 6.436                 |
| Man- $\alpha$ 1,4-Glc- $\beta$ N3                     | -341.39   | -2.300      | 1.246      | 0.709       | 9.000              | 6.382           | 0.709             | 9.000                    | 6.382                 |
| Man- $\alpha$ 1,4-Glc- $\beta$ N3                     | -341.37   | -1.947      | 1.629      | 0.715       | 9.000              | 6.436           | 0.715             | 9.000                    | 6.436                 |
| Man- $\alpha$ 1,6-Glc- $\beta$ N3                     | -341.09   | -1.819      | 2.755      | 0.915       | 8.000              | 7.318           | 0.915             | 8.000                    | 7.318                 |
| Man- $\alpha$ 1,6-Glc- $\beta$ N3                     | -341.48   | -1.296      | 2.886      | 0.836       | 8.000              | 6.691           | 0.836             | 8.000                    | 6.691                 |
| Man- $\alpha$ 1,6-Glc- $\beta$ N3                     | -341.10   | -0.839      | 3.326      | 0.833       | 8.000              | 6.664           | 0.833             | 8.000                    | 6.664                 |
| Man- $\alpha$ 1,6-Glc- $\beta$ N3                     | -341.40   | -0.655      | 3.532      | 0.838       | 8.000              | 6.700           | 0.838             | 8.000                    | 6.700                 |
| Man- $\alpha$ 1,6-Glc- $\beta$ N3                     | -341.97   | -0.574      | 2.542      | 0.623       | 11.000             | 6.855           | 0.623             | 11.000                   | 6.855                 |
| Man- $\alpha$ 1,4-[Glc- $\beta$ 1,6]-Glc- $\beta$ N3  | -342.25   | -1.788      | 2.235      | 0.805       | 8.000              | 6.436           | 0.805             | 8.000                    | 6.436                 |
| Man- $\alpha$ 1,4-[Glc- $\beta$ 1,6]-Glc- $\beta$ N3  | -342.17   | -1.220      | 2.557      | 0.756       | 9.000              | 6.800           | 0.756             | 9.000                    | 6.800                 |
| Man- $\alpha$ 1,4-[Glc- $\beta$ 1,6]-Glc- $\beta$ N3  | -342.12   | -1.130      | 2.814      | 0.789       | 9.000              | 7.100           | 0.789             | 9.000                    | 7.100                 |
| Man- $\alpha$ 1,4-[Glc- $\beta$ 1,6]-Glc- $\beta$ N3  | -342.19   | -0.730      | 3.043      | 0.755       | 9.000              | 6.791           | 0.755             | 9.000                    | 6.791                 |
| Man- $\alpha$ 1,4-[Glc- $\beta$ 1,6]-Glc- $\beta$ N3  | -342.10   | -0.049      | 3.582      | 0.726       | 9.000              | 6.536           | 0.726             | 9.000                    | 6.536                 |
| Glc- $\beta$ 1,4-[Man- $\alpha$ 1,6]-Glc- $\beta$ N3  | -342.21   | -1.690      | 2.237      | 0.785       | 10.000             | 7.855           | 0.785             | 10.000                   | 7.855                 |
| Glc- $\beta$ 1,4-[Man- $\alpha$ 1,6]-Glc- $\beta$ N3  | -342.24   | -0.731      | 2.632      | 0.673       | 10.000             | 6.727           | 0.673             | 10.000                   | 6.727                 |
| Glc- $\beta$ 1,4-[Man- $\alpha$ 1,6]-Glc- $\beta$ N3  | -342.57   | -0.126      | 3.118      | 0.649       | 11.000             | 7.136           | 0.649             | 11.000                   | 7.136                 |
| Glc- $\beta$ 1,4-[Man- $\alpha$ 1,6]-Glc- $\beta$ N3  | -342.59   | -0.073      | 3.191      | 0.653       | 11.000             | 7.182           | 0.653             | 11.000                   | 7.182                 |
| Glc- $\beta$ 1,4-[Man- $\alpha$ 1,6]-Glc- $\beta$ N3  | -342.93   | 0.350       | 3.594      | 0.649       | 11.000             | 7.136           | 0.649             | 11.000                   | 7.136                 |
| Man- $\alpha$ 1,4-[Man- $\alpha$ 1,6]-Glc- $\beta$ N3 | -342.55   | -1.943      | 1.688      | 0.726       | 10.000             | 7.264           | 0.726             | 10.000                   | 7.264                 |
| Man- $\alpha$ 1,4-[Man- $\alpha$ 1,6]-Glc- $\beta$ N3 | -343.39   | -0.869      | 2.370      | 0.648       | 11.000             | 7.127           | 0.648             | 11.000                   | 7.127                 |
| Man- $\alpha$ 1,4-[Man- $\alpha$ 1,6]-Glc- $\beta$ N3 | -343.18   | -0.845      | 2.515      | 0.672       | 11.000             | 7.391           | 0.672             | 11.000                   | 7.391                 |
| Man- $\alpha$ 1,4-[Man- $\alpha$ 1,6]-Glc- $\beta$ N3 | -343.18   | -0.806      | 2.503      | 0.662       | 10.000             | 6.618           | 0.662             | 10.000                   | 6.618                 |

|                                                        |         |        |       |       |        |       |       |        |       |
|--------------------------------------------------------|---------|--------|-------|-------|--------|-------|-------|--------|-------|
| Man- $\alpha$ 1,4-[Man- $\alpha$ 1,6]-Glc- $\beta$ N3  | -342.95 | -0.044 | 3.206 | 0.650 | 8.000  | 5.200 | 0.650 | 8.000  | 5.200 |
| Man- $\alpha$ 1,4-Gal- $\beta$ N3                      | -341.24 | -2.182 | 1.585 | 0.754 | 9.000  | 6.782 | 0.754 | 9.000  | 6.782 |
| Man- $\alpha$ 1,4-Gal- $\beta$ N3                      | -341.25 | -2.142 | 1.585 | 0.745 | 9.000  | 6.709 | 0.745 | 9.000  | 6.709 |
| Man- $\alpha$ 1,4-Gal- $\beta$ N3                      | -341.32 | -2.023 | 2.136 | 0.832 | 8.000  | 6.655 | 0.832 | 8.000  | 6.655 |
| Man- $\alpha$ 1,4-Gal- $\beta$ N3                      | -341.21 | -1.928 | 1.743 | 0.734 | 9.000  | 6.609 | 0.734 | 9.000  | 6.609 |
| Man- $\alpha$ 1,4-Gal- $\beta$ N3                      | -341.42 | -1.916 | 1.847 | 0.753 | 9.000  | 6.773 | 0.753 | 9.000  | 6.773 |
| Man- $\alpha$ 1,6-Gal- $\beta$ N3                      | -340.52 | -2.655 | 1.549 | 0.841 | 8.000  | 6.727 | 0.841 | 8.000  | 6.727 |
| Man- $\alpha$ 1,6-Gal- $\beta$ N3                      | -340.65 | -2.161 | 1.738 | 0.780 | 9.000  | 7.018 | 0.780 | 9.000  | 7.018 |
| Man- $\alpha$ 1,6-Gal- $\beta$ N3                      | -340.54 | -0.013 | 3.830 | 0.769 | 9.000  | 6.918 | 0.769 | 9.000  | 6.918 |
| Man- $\alpha$ 1,6-Gal- $\beta$ N3                      | -340.52 | 0.088  | 3.435 | 0.669 | 8.000  | 5.355 | 0.669 | 8.000  | 5.355 |
| Man- $\alpha$ 1,6-Gal- $\beta$ N3                      | -341.00 | 0.447  | 4.169 | 0.744 | 8.000  | 5.955 | 0.744 | 8.000  | 5.955 |
| Man- $\alpha$ 1,4-[Glc- $\beta$ 1,6]-Gal- $\beta$ N3   | -343.13 | -0.928 | 2.688 | 0.723 | 9.000  | 6.509 | 0.723 | 9.000  | 6.509 |
| Man- $\alpha$ 1,4-[Glc- $\beta$ 1,6]-Gal- $\beta$ N3   | -343.57 | -0.465 | 2.880 | 0.669 | 10.000 | 6.691 | 0.669 | 10.000 | 6.691 |
| Man- $\alpha$ 1,4-[Glc- $\beta$ 1,6]-Gal- $\beta$ N3   | -343.53 | -0.195 | 3.341 | 0.707 | 10.000 | 7.073 | 0.707 | 10.000 | 7.073 |
| Man- $\alpha$ 1,4-[Glc- $\beta$ 1,6]-Gal- $\beta$ N3   | -342.86 | 0.156  | 3.251 | 0.619 | 11.000 | 6.809 | 0.619 | 11.000 | 6.809 |
| Man- $\alpha$ 1,4-[Glc- $\beta$ 1,6]-Gal- $\beta$ N3   | -342.86 | 0.335  | 3.459 | 0.625 | 11.000 | 6.873 | 0.625 | 11.000 | 6.873 |
| Glc- $\beta$ 1,4-[Man- $\alpha$ 1,6]-Gal- $\beta$ N3   | -342.35 | -3.239 | 1.564 | 0.961 | 9.000  | 8.645 | 0.961 | 9.000  | 8.645 |
| Glc- $\beta$ 1,4-[Man- $\alpha$ 1,6]-Gal- $\beta$ N3   | -342.41 | -3.001 | 1.640 | 0.928 | 9.000  | 8.355 | 0.928 | 9.000  | 8.355 |
| Glc- $\beta$ 1,4-[Man- $\alpha$ 1,6]-Gal- $\beta$ N3   | -342.28 | -2.996 | 1.645 | 0.928 | 9.000  | 8.355 | 0.928 | 9.000  | 8.355 |
| Glc- $\beta$ 1,4-[Man- $\alpha$ 1,6]-Gal- $\beta$ N3   | -342.19 | -2.904 | 1.641 | 0.909 | 9.000  | 8.182 | 0.909 | 9.000  | 8.182 |
| Glc- $\beta$ 1,4-[Man- $\alpha$ 1,6]-Gal- $\beta$ N3   | -342.66 | -2.757 | 1.398 | 0.831 | 10.000 | 8.309 | 0.831 | 10.000 | 8.309 |
| Man- $\alpha$ 1,4-[Man- $\alpha$ 1,6]-Gal- $\beta$ N3  | -341.83 | -2.589 | 2.133 | 0.944 | 9.000  | 8.500 | 0.944 | 9.000  | 8.500 |
| Man- $\alpha$ 1,4-[Man- $\alpha$ 1,6]-Gal- $\beta$ N3  | -343.99 | -1.540 | 2.001 | 0.708 | 11.000 | 7.791 | 0.708 | 11.000 | 7.791 |
| Man- $\alpha$ 1,4-[Man- $\alpha$ 1,6]-Gal- $\beta$ N3  | -342.26 | -1.271 | 2.152 | 0.685 | 10.000 | 6.845 | 0.685 | 10.000 | 6.845 |
| Man- $\alpha$ 1,4-[Man- $\alpha$ 1,6]-Gal- $\beta$ N3  | -342.24 | 0.433  | 3.938 | 0.701 | 9.000  | 6.309 | 0.701 | 9.000  | 6.309 |
| Man- $\alpha$ 1,4-[Man- $\alpha$ 1,6]-Gal- $\beta$ N3  | -342.09 | 0.986  | 4.195 | 0.642 | 10.000 | 6.418 | 0.642 | 10.000 | 6.418 |
| Glc- $\alpha$ 1,4-[Man- $\alpha$ 1,6]-Glc- $\beta$ N3  | -341.46 | -2.680 | 1.120 | 0.760 | 10.000 | 7.600 | 0.760 | 10.000 | 7.600 |
| Glc- $\alpha$ 1,4-[Man- $\alpha$ 1,6]-Glc- $\beta$ N3  | -342.49 | -1.756 | 2.224 | 0.796 | 9.000  | 7.164 | 0.796 | 9.000  | 7.164 |
| Glc- $\alpha$ 1,4-[Man- $\alpha$ 1,6]-Glc- $\beta$ N3  | -342.40 | -1.674 | 1.971 | 0.729 | 10.000 | 7.291 | 0.729 | 10.000 | 7.291 |
| Glc- $\alpha$ 1,4-[Man- $\alpha$ 1,6]-Glc- $\beta$ N3  | -340.55 | -1.259 | 3.116 | 0.875 | 8.000  | 7.000 | 0.875 | 8.000  | 7.000 |
| Glc- $\alpha$ 1,4-[Man- $\alpha$ 1,6]-Glc- $\beta$ N3  | -342.07 | -0.523 | 3.326 | 0.770 | 9.000  | 6.927 | 0.770 | 9.000  | 6.927 |
| Glc- $\beta$ 1,3-[Man- $\alpha$ 1,6]-Glc- $\beta$ N3   | -342.90 | -0.011 | 3.448 | 0.692 | 10.000 | 6.918 | 0.692 | 10.000 | 6.918 |
| Glc- $\beta$ 1,3-[Man- $\alpha$ 1,6]-Glc- $\beta$ N3   | -343.05 | 0.139  | 3.205 | 0.613 | 11.000 | 6.745 | 0.613 | 11.000 | 6.745 |
| Glc- $\beta$ 1,3-[Man- $\alpha$ 1,6]-Glc- $\beta$ N3   | -342.32 | 0.437  | 4.119 | 0.736 | 9.000  | 6.627 | 0.736 | 9.000  | 6.627 |
| Glc- $\beta$ 1,3-[Man- $\alpha$ 1,6]-Glc- $\beta$ N3   | -343.11 | 0.474  | 3.527 | 0.611 | 11.000 | 6.718 | 0.611 | 11.000 | 6.718 |
| Glc- $\beta$ 1,3-[Man- $\alpha$ 1,6]-Glc- $\beta$ N3   | -342.44 | 1.664  | 5.037 | 0.675 | 10.000 | 6.745 | 0.675 | 10.000 | 6.745 |
| Man- $\alpha$ 1,3-[Man- $\alpha$ 1,6]-Man- $\beta$ N3  | -342.59 | -1.365 | 2.736 | 0.820 | 9.000  | 7.382 | 0.820 | 9.000  | 7.382 |
| Man- $\alpha$ 1,3-[Man- $\alpha$ 1,6]-Man- $\beta$ N3  | -342.72 | 0.661  | 4.134 | 0.695 | 10.000 | 6.945 | 0.695 | 10.000 | 6.945 |
| Man- $\alpha$ 1,3-[Man- $\alpha$ 1,6]-Man- $\beta$ N3  | -342.77 | 1.233  | 4.452 | 0.644 | 11.000 | 7.082 | 0.644 | 11.000 | 7.082 |
| Man- $\alpha$ 1,3-[Man- $\alpha$ 1,6]-Man- $\beta$ N3  | -342.45 | 1.675  | 4.902 | 0.645 | 11.000 | 7.100 | 0.645 | 11.000 | 7.100 |
| Man- $\alpha$ 1,3-[Man- $\alpha$ 1,6]-Man- $\beta$ N3  | -342.76 | 1.876  | 5.203 | 0.665 | 11.000 | 7.318 | 0.665 | 11.000 | 7.318 |
| Man- $\alpha$ 1,4-[Glc- $\beta$ 1,6]-Glc- $\beta$ Prop | -343.06 | -1.483 | 2.476 | 0.792 | 9.000  | 7.127 | 0.792 | 9.000  | 7.127 |
| Man- $\alpha$ 1,4-[Glc- $\beta$ 1,6]-Glc- $\beta$ Prop | -343.29 | -1.162 | 2.727 | 0.778 | 9.000  | 7.000 | 0.778 | 9.000  | 7.000 |
| Man- $\alpha$ 1,4-[Glc- $\beta$ 1,6]-Glc- $\beta$ Prop | -343.03 | -0.980 | 2.873 | 0.771 | 9.000  | 6.936 | 0.771 | 9.000  | 6.936 |

|                                                        |         |        |       |       |        |       |       |        |       |
|--------------------------------------------------------|---------|--------|-------|-------|--------|-------|-------|--------|-------|
| Man- $\alpha$ 1,4-[Glc- $\beta$ 1,6]-Glc- $\beta$ Prop | -343.05 | -0.919 | 3.581 | 0.900 | 8.000  | 7.200 | 0.900 | 8.000  | 7.200 |
| Man- $\alpha$ 1,4-[Glc- $\beta$ 1,6]-Glc- $\beta$ Prop | -342.93 | -0.710 | 3.083 | 0.759 | 9.000  | 6.827 | 0.759 | 9.000  | 6.827 |
| Glc- $\beta$ 1,4-[Man- $\alpha$ 1,6]-Glc- $\beta$ Prop | -343.55 | -1.899 | 2.212 | 0.822 | 9.000  | 7.400 | 0.822 | 9.000  | 7.400 |
| Glc- $\beta$ 1,4-[Man- $\alpha$ 1,6]-Glc- $\beta$ Prop | -343.07 | -1.788 | 2.798 | 0.917 | 9.000  | 8.255 | 0.917 | 9.000  | 8.255 |
| Glc- $\beta$ 1,4-[Man- $\alpha$ 1,6]-Glc- $\beta$ Prop | -343.05 | -0.694 | 2.922 | 0.723 | 9.000  | 6.509 | 0.723 | 9.000  | 6.509 |
| Glc- $\beta$ 1,4-[Man- $\alpha$ 1,6]-Glc- $\beta$ Prop | -343.34 | -0.555 | 2.817 | 0.675 | 10.000 | 6.745 | 0.675 | 10.000 | 6.745 |
| Glc- $\beta$ 1,4-[Man- $\alpha$ 1,6]-Glc- $\beta$ Prop | -343.13 | -0.392 | 2.517 | 0.582 | 11.000 | 6.400 | 0.582 | 11.000 | 6.400 |

**Table S12.** Values of computed binding energies  $\Delta G_{\text{Bind}}$  (in kcal mol<sup>-1</sup>) obtained from MM-GBSA calculations for the respective glycans into the closed gate (pdb: 1UWF) conformation of FimH. Most stable binding poses from IFD ranked by binding pose metadynamics simulations were selected.

| Glycan                                                            | IFD<br>Score | $\Delta G_{\text{Bind}}$ | $\Delta G_{\text{Bind}}$<br>Coulomb | $\Delta G_{\text{Bind}}$<br>Covalent | $\Delta G_{\text{Bind}}$<br>Hbond | $\Delta G_{\text{Bind}}$<br>Lipo | $\Delta G_{\text{Bind}}$<br>Solv GB | $\Delta G_{\text{Bind}}$<br>vdW | Lig Strain<br>Energy |
|-------------------------------------------------------------------|--------------|--------------------------|-------------------------------------|--------------------------------------|-----------------------------------|----------------------------------|-------------------------------------|---------------------------------|----------------------|
| Man- $\alpha$ 1,4-Glc- $\beta$ N <sub>3</sub>                     | -341.27      | -55.65                   | -55.69                              | 6.86                                 | -6.64                             | -13.17                           | 38.81                               | -25.81                          | 11.128               |
| Man- $\alpha$ 1,6-Glc- $\beta$ N <sub>3</sub>                     | -341.09      | -58.34                   | -53.86                              | 4.25                                 | -7.33                             | -12.58                           | 34.92                               | -23.74                          | 12.298               |
| Man- $\alpha$ 1,4-[Glc- $\beta$ 1,6]-Glc- $\beta$ N <sub>3</sub>  | -342.25      | -67.51                   | -56.63                              | 0.86                                 | -6.44                             | -14.09                           | 39.30                               | -30.52                          | 7.486                |
| Glc- $\beta$ 1,4-[Man- $\alpha$ 1,6]-Glc- $\beta$ N <sub>3</sub>  | -342.21      | -53.89                   | -60.21                              | 2.68                                 | -7.67                             | -11.43                           | 44.90                               | -22.15                          | 13.803               |
| Man- $\alpha$ 1,4-[Man- $\alpha$ 1,6]-Glc- $\beta$ N <sub>3</sub> | -343.39      | -67.43                   | -60.19                              | 4.94                                 | -9.22                             | -16.00                           | 38.54                               | -25.50                          | 14.303               |
| Man- $\alpha$ 1,4-Gal- $\beta$ N <sub>3</sub>                     | -341.24      | -54.14                   | -55.33                              | 5.97                                 | -6.79                             | -11.39                           | 34.33                               | -20.94                          | 11.363               |
| Man- $\alpha$ 1,6-Gal- $\beta$ N <sub>3</sub>                     | -340.52      | -61.34                   | -57.47                              | 3.74                                 | -7.05                             | -12.38                           | 34.50                               | -22.69                          | 8.196                |
| Man- $\alpha$ 1,4-[Glc- $\beta$ 1,6]-Gal- $\beta$ N <sub>3</sub>  | -343.13      | -58.13                   | -53.87                              | 3.98                                 | -8.72                             | -13.08                           | 44.04                               | -30.48                          | 14.209               |
| Glc- $\beta$ 1,4-[Man- $\alpha$ 1,6]-Gal- $\beta$ N <sub>3</sub>  | -342.35      | -72.76                   | -59.09                              | 0.17                                 | -8.71                             | -15.80                           | 41.72                               | -31.05                          | 11.684               |
| Man- $\alpha$ 1,4-[Man- $\alpha$ 1,6]-Gal- $\beta$ N <sub>3</sub> | -341.83      | -62.39                   | -48.41                              | 0.53                                 | -8.04                             | -16.72                           | 40.30                               | -30.04                          | 13.362               |
| Glc- $\alpha$ 1,4-[Man- $\alpha$ 1,6]-Glc- $\beta$ N <sub>3</sub> | -341.46      | -62.04                   | -53.30                              | 1.05                                 | -8.65                             | -12.29                           | 41.04                               | -29.89                          | 13.461               |
| Glc- $\beta$ 1,3-[Man- $\alpha$ 1,6]-Glc- $\beta$ N <sub>3</sub>  | -342.90      | -73.04                   | -66.97                              | 2.02                                 | -7.83                             | -17.90                           | 44.87                               | -27.23                          | 10.607               |
| Man- $\alpha$ 1,3-[Man- $\alpha$ 1,6]-Man- $\beta$ N <sub>3</sub> | -342.59      | -54.10                   | -45.53                              | 5.09                                 | -7.87                             | -14.30                           | 37.67                               | -29.17                          | 17.646               |
| Man- $\alpha$ 1,4-[Glc- $\beta$ 1,6]-Glc- $\beta$ Prop            | -343.06      | -64.56                   | -48.38                              | 6.54                                 | -7.23                             | -16.81                           | 33.83                               | -32.51                          | 20.396               |
| Glc- $\beta$ 1,4-[Man- $\alpha$ 1,6]-Glc- $\beta$ Prop            | -343.55      | -61.17                   | -53.13                              | 11.70                                | -8.08                             | -17.68                           | 37.73                               | -31.71                          | 21.685               |

**Figure S11.** FimH-glycan complexes as derived from induced fit docking (IFD) using the closed gate conformation of FimH (pdb: 1UWF). Top scoring poses from binding pose metadynamics simulation (Table S11) were selected. On the left side, Connolly surface representations are shown. Protein coloring represents the electrostatic potential of the surface (positive charges in purple, neutral in green, negative charges in red). Hydrogen bonds are indicated as dashed lines. On the right side, two-dimensional representations of the protein ligand interactions are shown. The hydrogen bond network is shown in magenta,  $\pi$ -cation interactions are shown in red. FimH amino acids are represented teardrop-shaped in feature-related colours: red: negatively charged; light blue: polar; green: hydrophobic. The polypeptide chain is indicated as black line and the mannose binding pocket as multi-coloured line (interruption indicates solvent exposure). Grey shades indicated solvent exposure. A) Man- $\alpha$ 1,4-Glc- $\beta$ N<sub>3</sub> **S6** B) Man- $\alpha$ 1,6-Glc- $\beta$ N<sub>3</sub> **S1** C) Man- $\alpha$ 1,4-[Glc- $\beta$ 1,6]-Glc- $\beta$ N<sub>3</sub> **11** D) Glc- $\beta$ 1,4-[Man- $\alpha$ 1,6]-Glc- $\beta$ N<sub>3</sub> **10** E) Man- $\alpha$ 1,4-[Man- $\alpha$ 1,6]-Glc- $\beta$ N<sub>3</sub> **26** F) Man- $\alpha$ 1,4-Gal- $\beta$ N<sub>3</sub> **S7** G) Man- $\alpha$ 1,6-Gal- $\beta$ N<sub>3</sub> **45** H) Man- $\alpha$ 1,4-[Glc- $\beta$ 1,6]-Gal- $\beta$ N<sub>3</sub> **21** I) Glc- $\beta$ 1,4-[Man- $\alpha$ 1,6]-Gal- $\beta$ N<sub>3</sub> **20** J) Man- $\alpha$ 1,4-[Man- $\alpha$ 1,6]-Gal- $\beta$ N<sub>3</sub> **27** K) Glc- $\alpha$ 1,4-[Man- $\alpha$ 1,6]-Glc- $\beta$ N<sub>3</sub> **32** L) Glc- $\beta$ 1,3-[Man- $\alpha$ 1,6]-Glc- $\beta$ N<sub>3</sub> **37** M) Man- $\alpha$ 1,3-[Man- $\alpha$ 1,6]-Man- $\beta$ N<sub>3</sub> **41** N) Man- $\alpha$ 1,4-[Glc- $\beta$ 1,6]-Glc- $\beta$ Prop **S2** O) Glc- $\beta$ 1,4-[Man- $\alpha$ 1,6]-Glc- $\beta$ Prop **S3**.

**A**

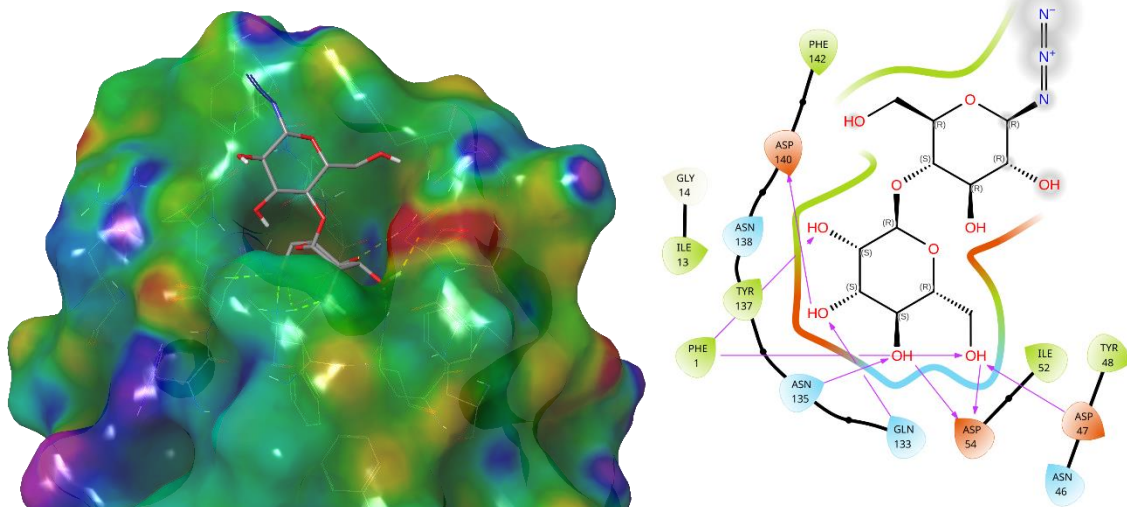

**B**

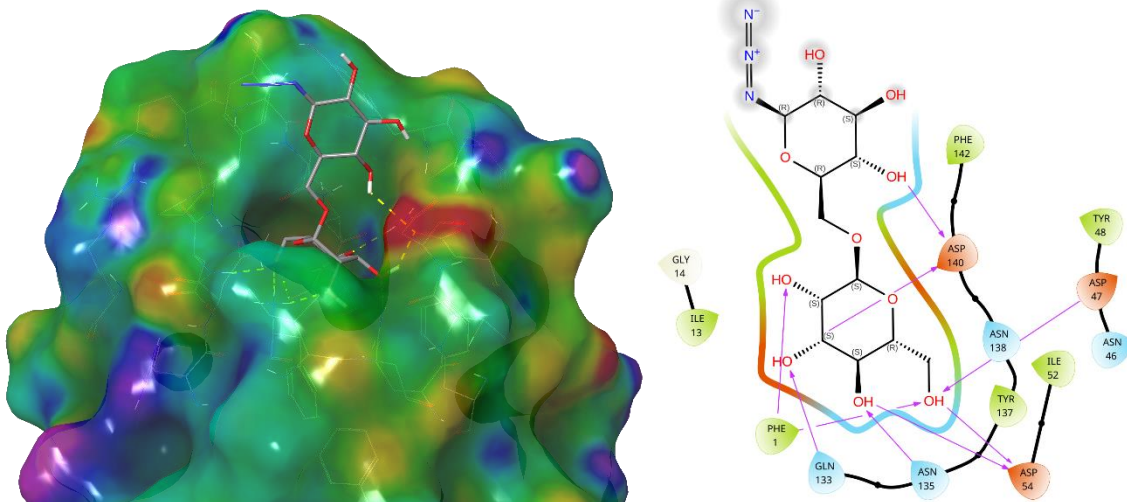



C

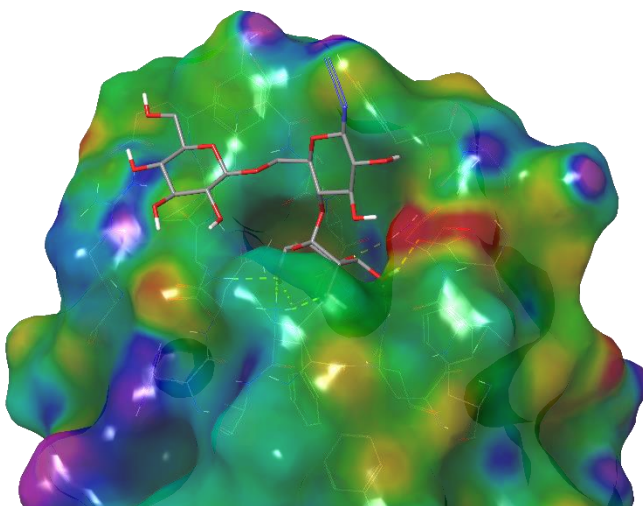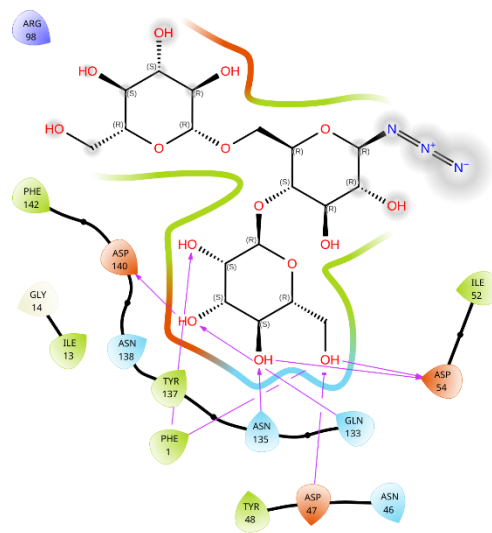

D

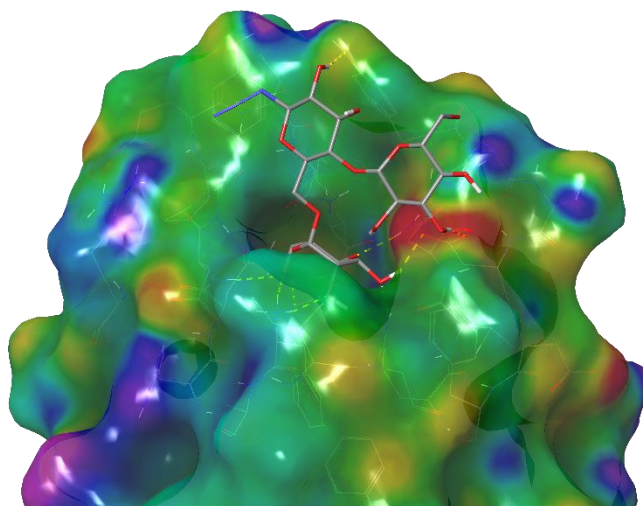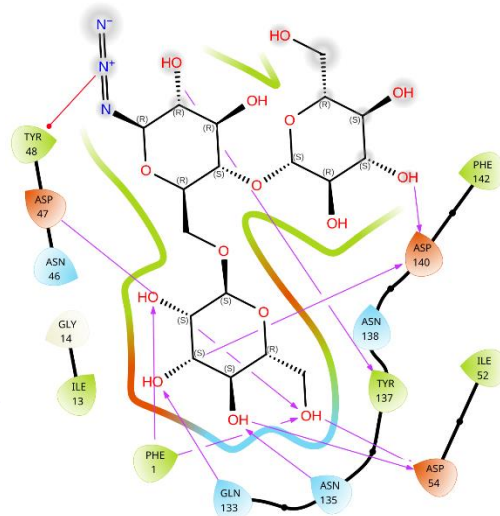

E

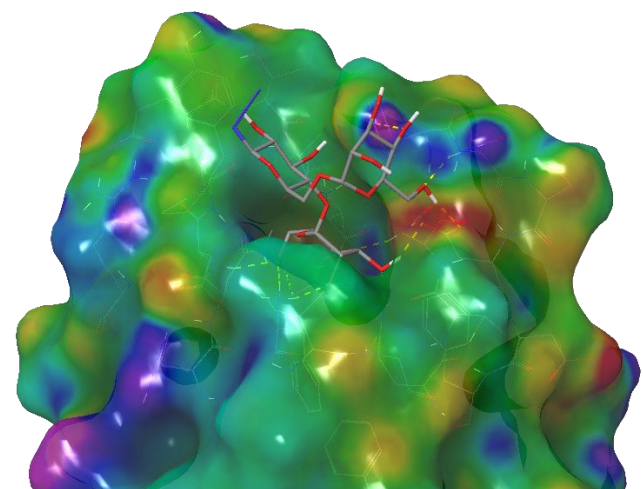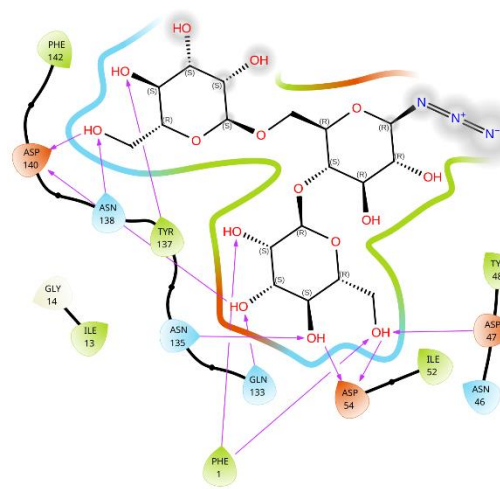

F

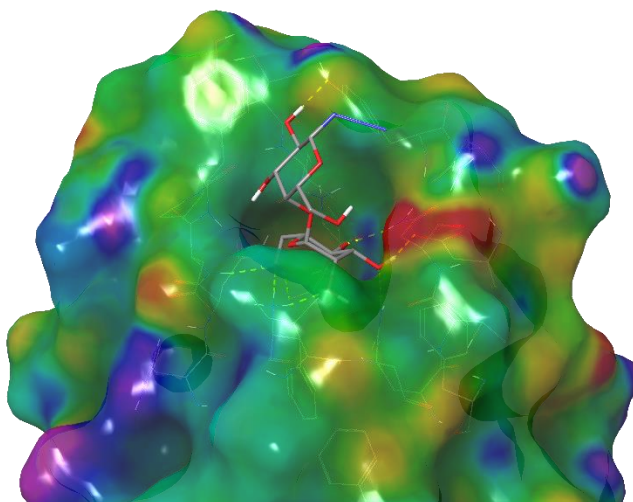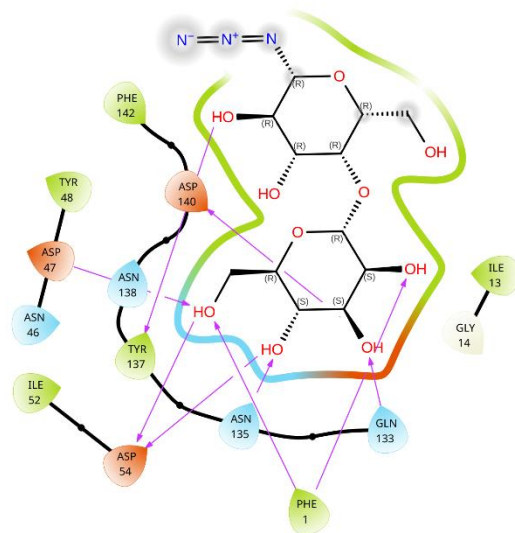

G

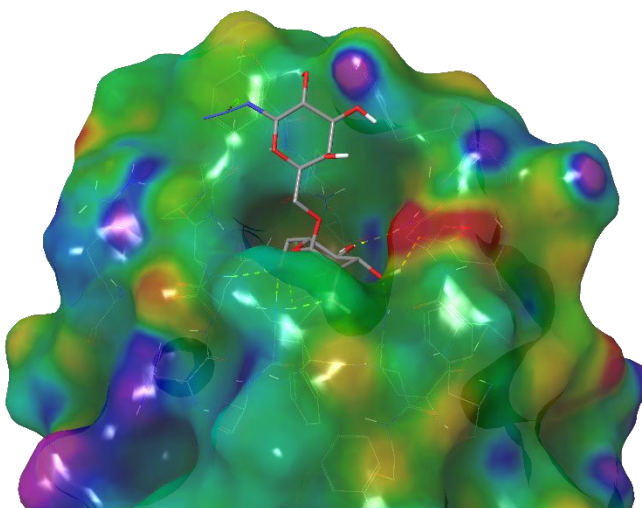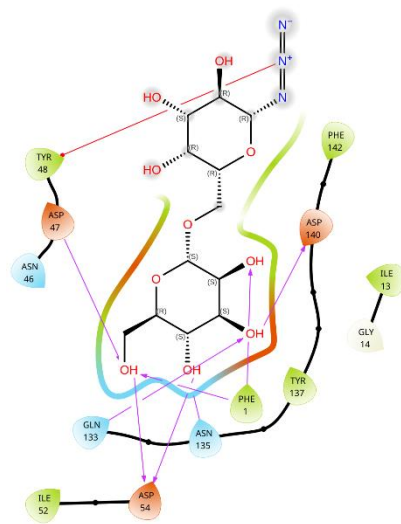

H

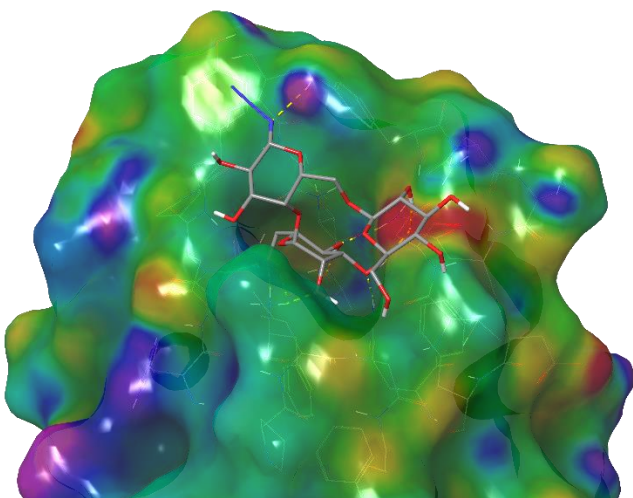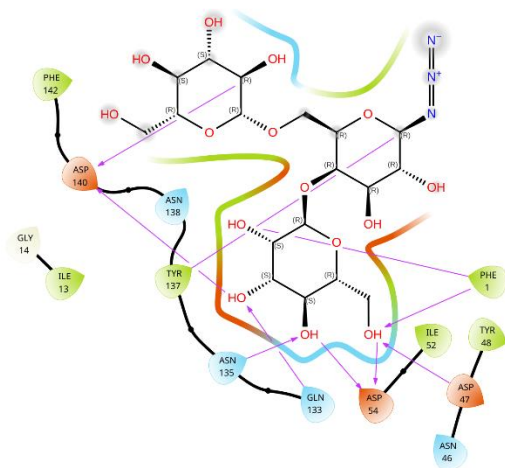



I

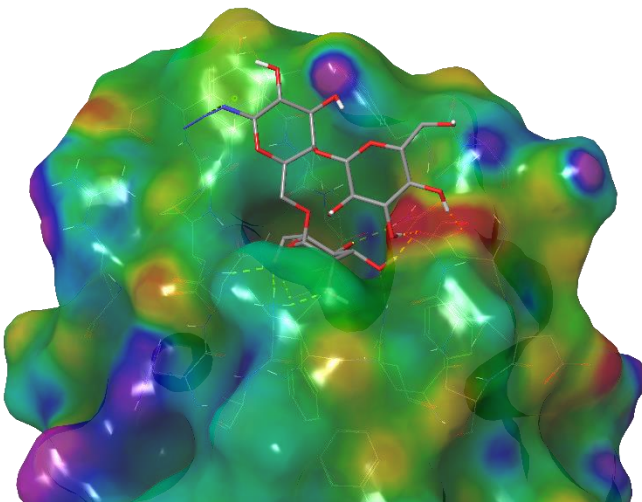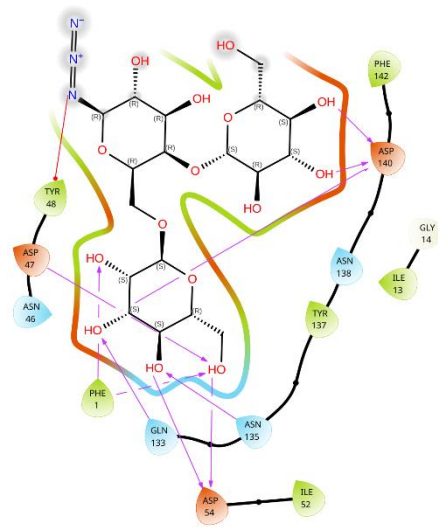

J

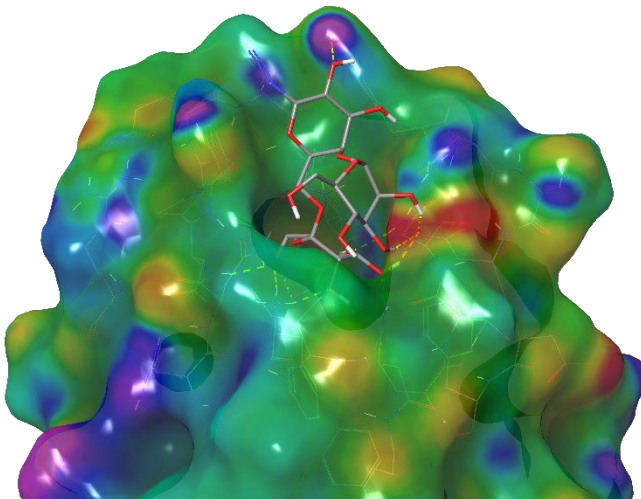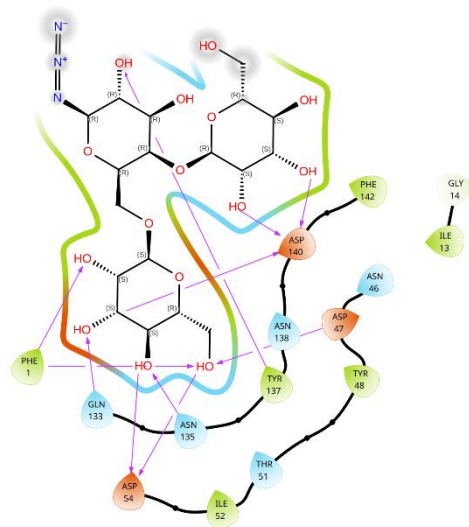

K

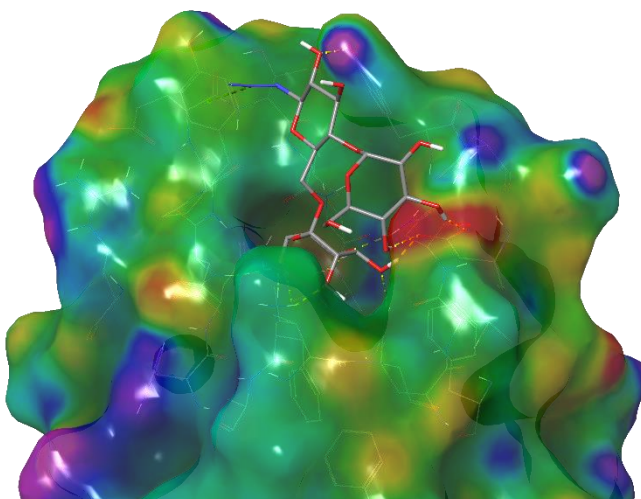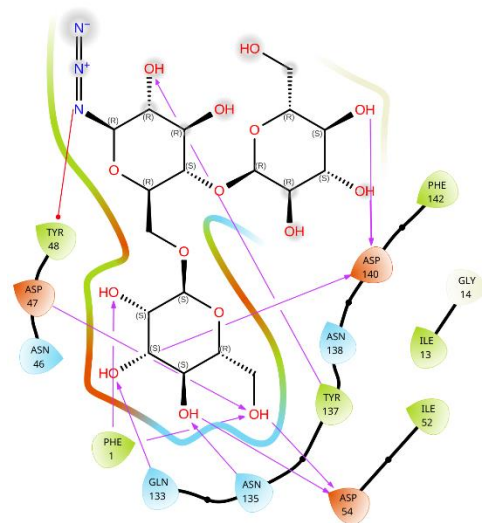

L

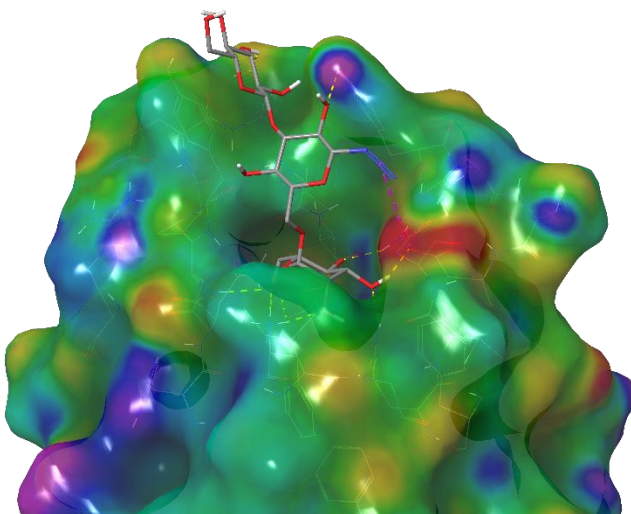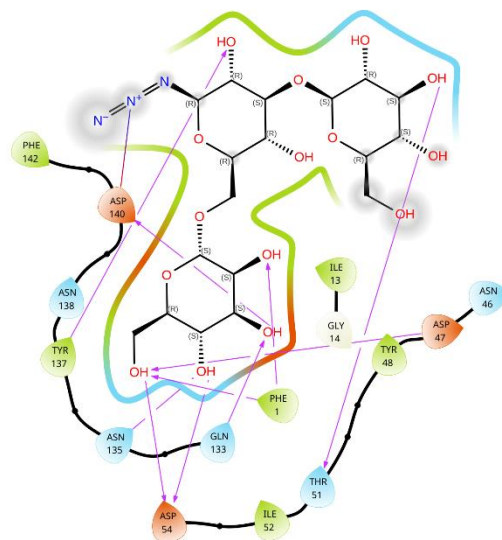

M

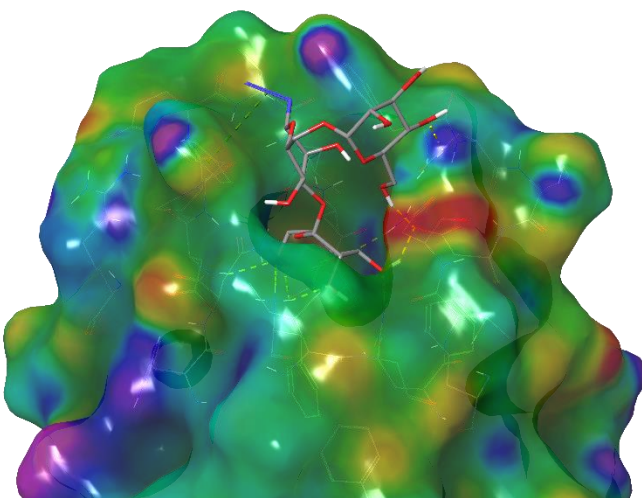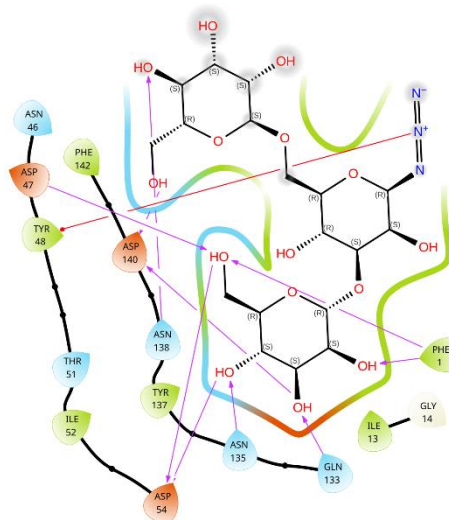

N

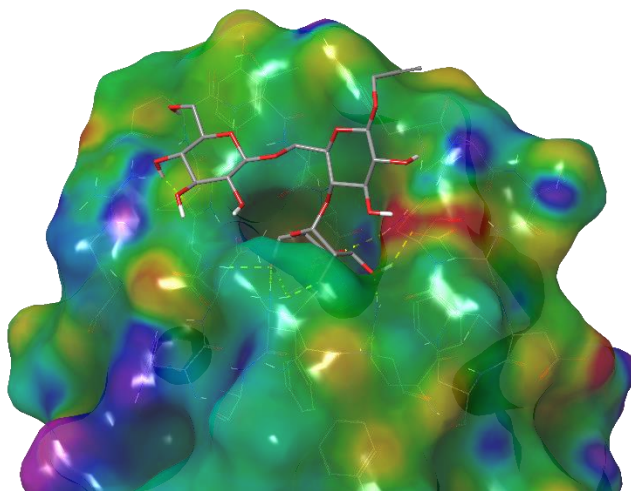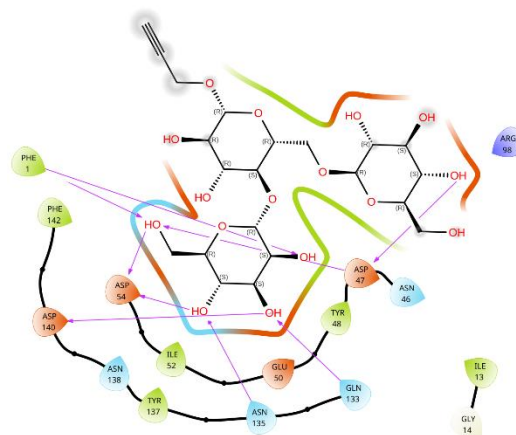



O

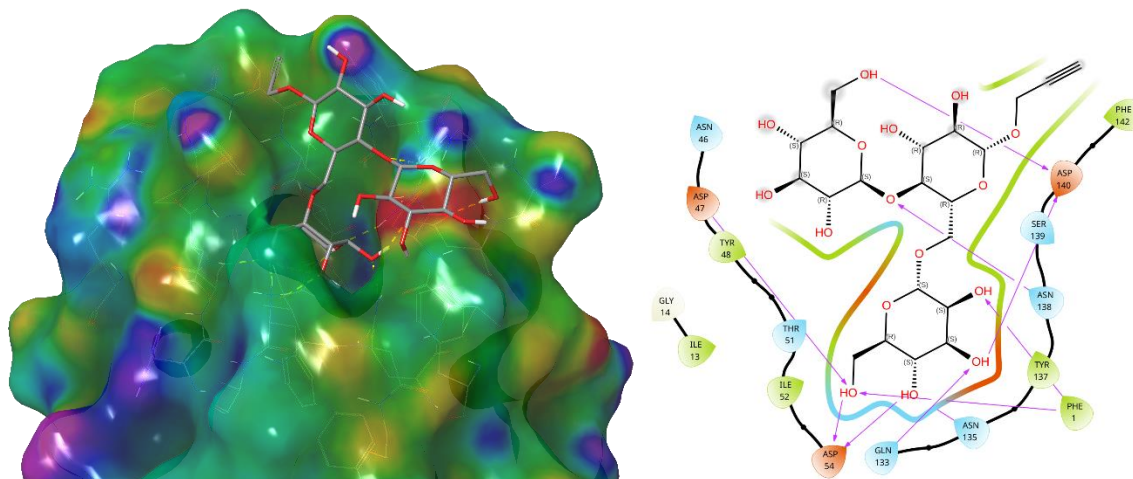

**Figure S12.** Plots from binding pose metadynamics simulation of averaged RMSD as collective variables (CV) in Å over the duration of the simulation. A) Man- $\alpha$ 1,4-Glc- $\beta$ N<sub>3</sub> **S6** B) Man- $\alpha$ 1,6-Glc- $\beta$ N<sub>3</sub> **S1** C) Man- $\alpha$ 1,4-[Glc- $\beta$ 1,6]-Glc- $\beta$ N<sub>3</sub> **11** D) Glc- $\beta$ 1,4-[Man- $\alpha$ 1,6]-Glc- $\beta$ N<sub>3</sub> **10** E) Man- $\alpha$ 1,4-[Man- $\alpha$ 1,6]-Glc- $\beta$ N<sub>3</sub> **26** F) Man- $\alpha$ 1,4-Gal- $\beta$ N<sub>3</sub> **S7** G) Man- $\alpha$ 1,6-Gal- $\beta$ N<sub>3</sub> **45** H) Man- $\alpha$ 1,4-[Glc- $\beta$ 1,6]-Gal- $\beta$ N<sub>3</sub> **21** I) Glc- $\beta$ 1,4-[Man- $\alpha$ 1,6]-Gal- $\beta$ N<sub>3</sub> **20** J) Man- $\alpha$ 1,4-[Man- $\alpha$ 1,6]-Gal- $\beta$ N<sub>3</sub> **27** K) Glc- $\alpha$ 1,4-[Man- $\alpha$ 1,6]-Glc- $\beta$ N<sub>3</sub> **32** L) Glc- $\beta$ 1,3-[Man- $\alpha$ 1,6]-Glc- $\beta$ N<sub>3</sub> **37** M) Man- $\alpha$ 1,3-[Man- $\alpha$ 1,6]-Man- $\beta$ N<sub>3</sub> **41** N) Man- $\alpha$ 1,4-[Glc- $\beta$ 1,6]-Glc- $\beta$ Prop **S2** O) Glc- $\beta$ 1,4-[Man- $\alpha$ 1,6]-Glc- $\beta$ Prop **S3**.

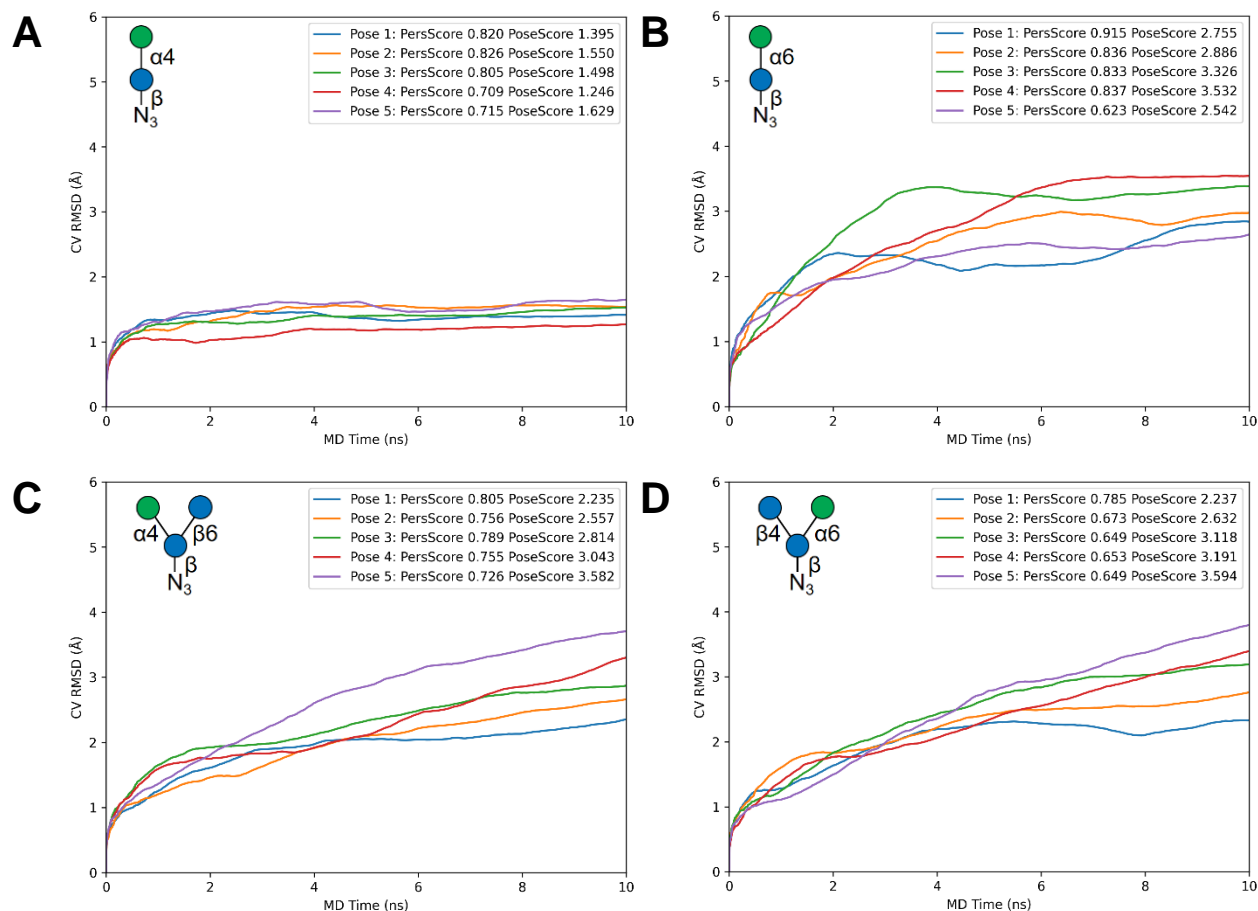

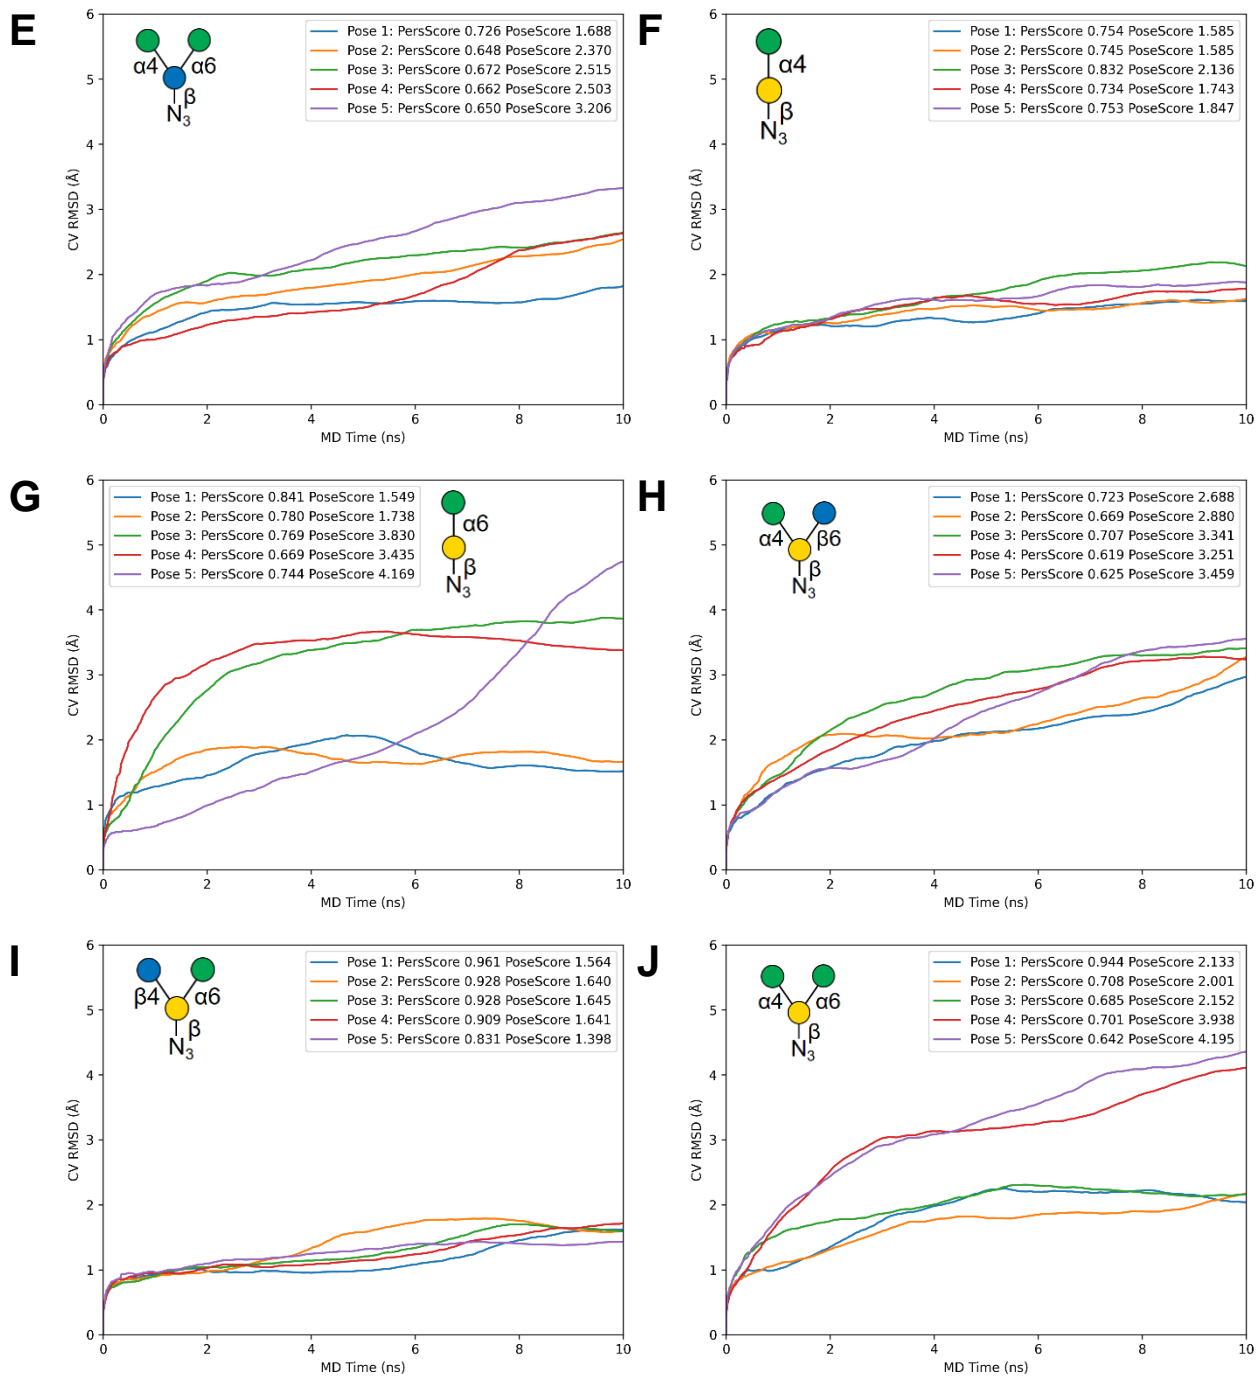

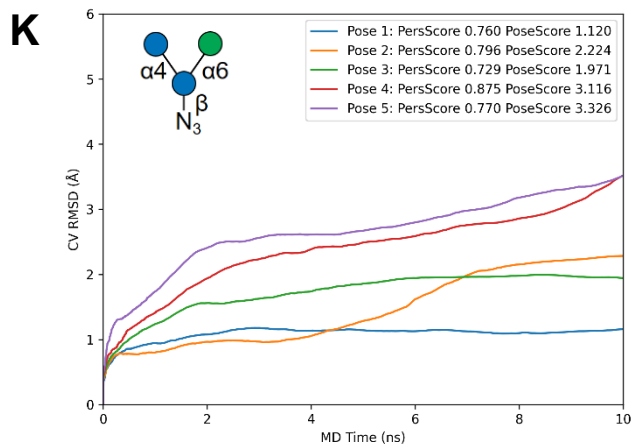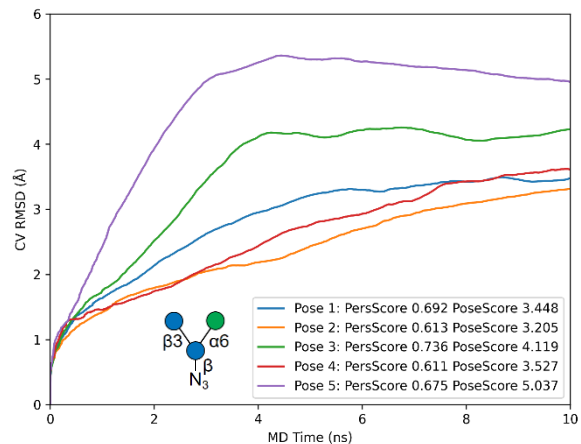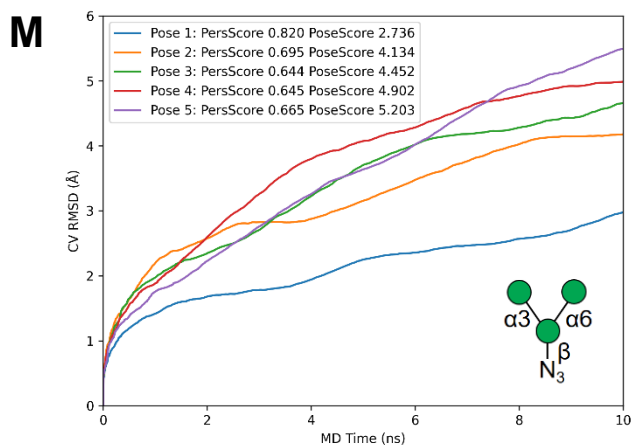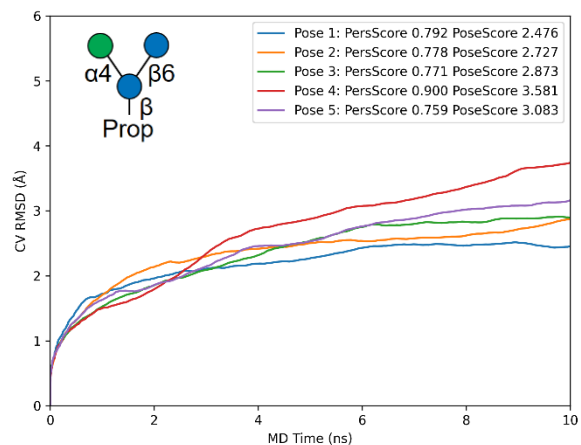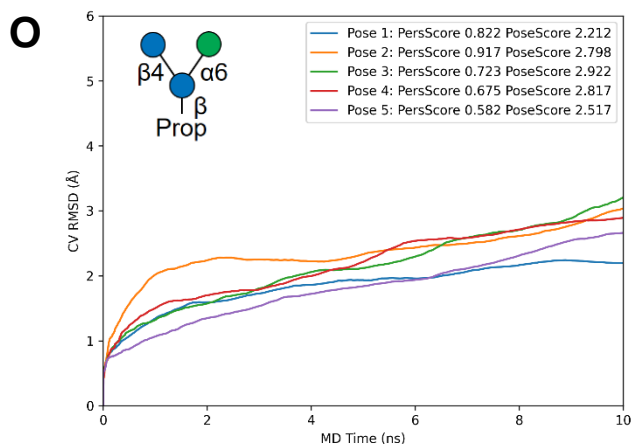

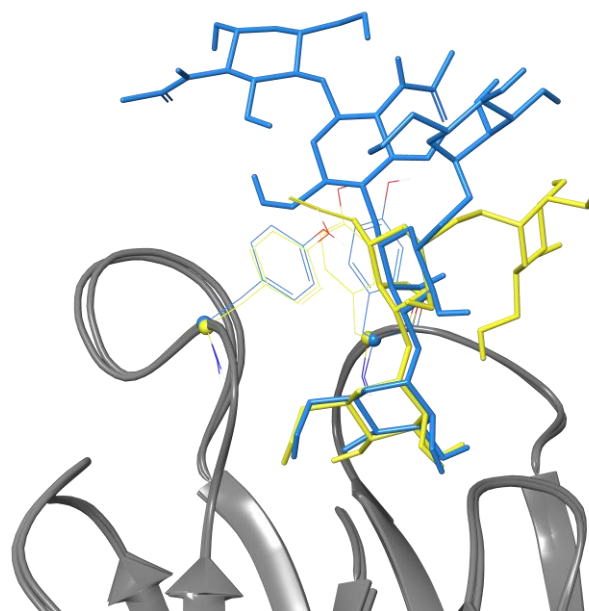

**Figure S13.** Comparison of the literature-known crystal structure of FimH in complex with oligomannose-3 (blue, pdb: 2VCO)<sup>[11]</sup> with the resulting binding pose from IFD of Man $\alpha$ 1-3[Man $\alpha$ 1-6]Man- $\beta$ N<sub>3</sub> **41** (yellow). The protein structure is represented as ribbons and only Tyr48 and Tyr137 are explicitly shown.



## 5. NMR Spectra of synthesized saccharides

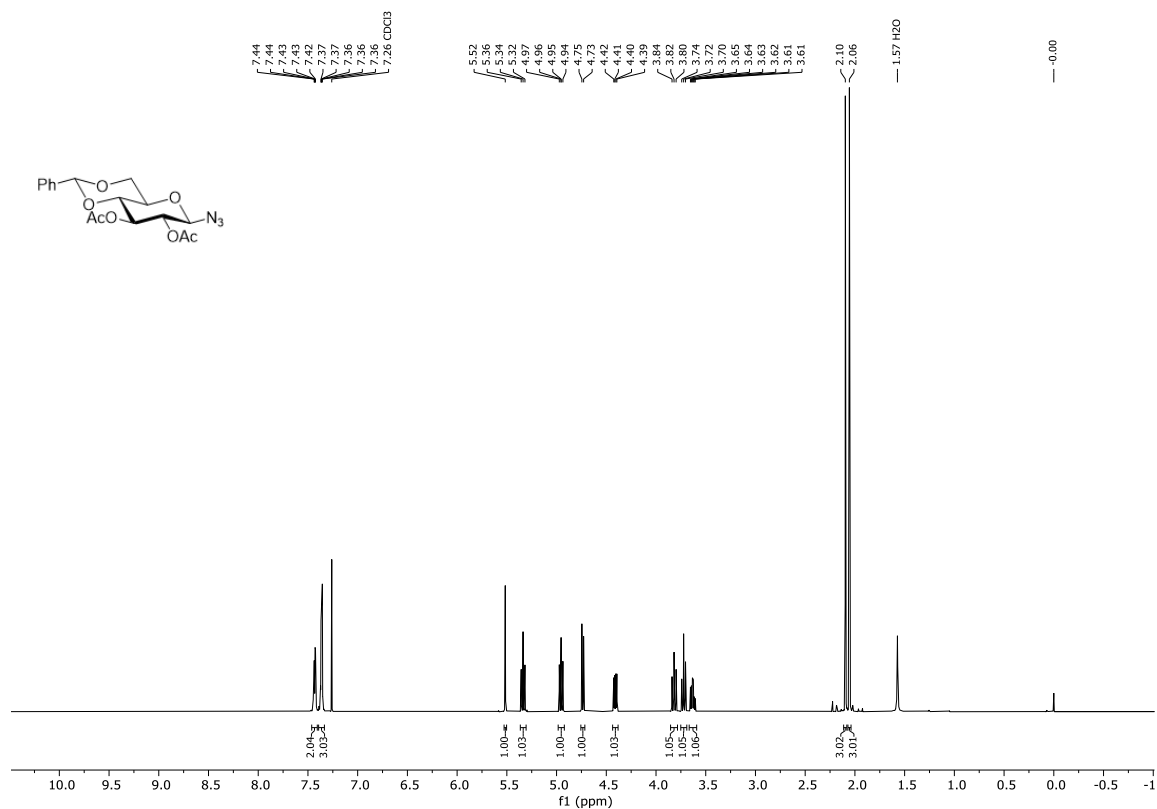

Figure S14. <sup>1</sup>H NMR spectrum of compound 2 (500 MHz, CDCl<sub>3</sub>, 298 K).

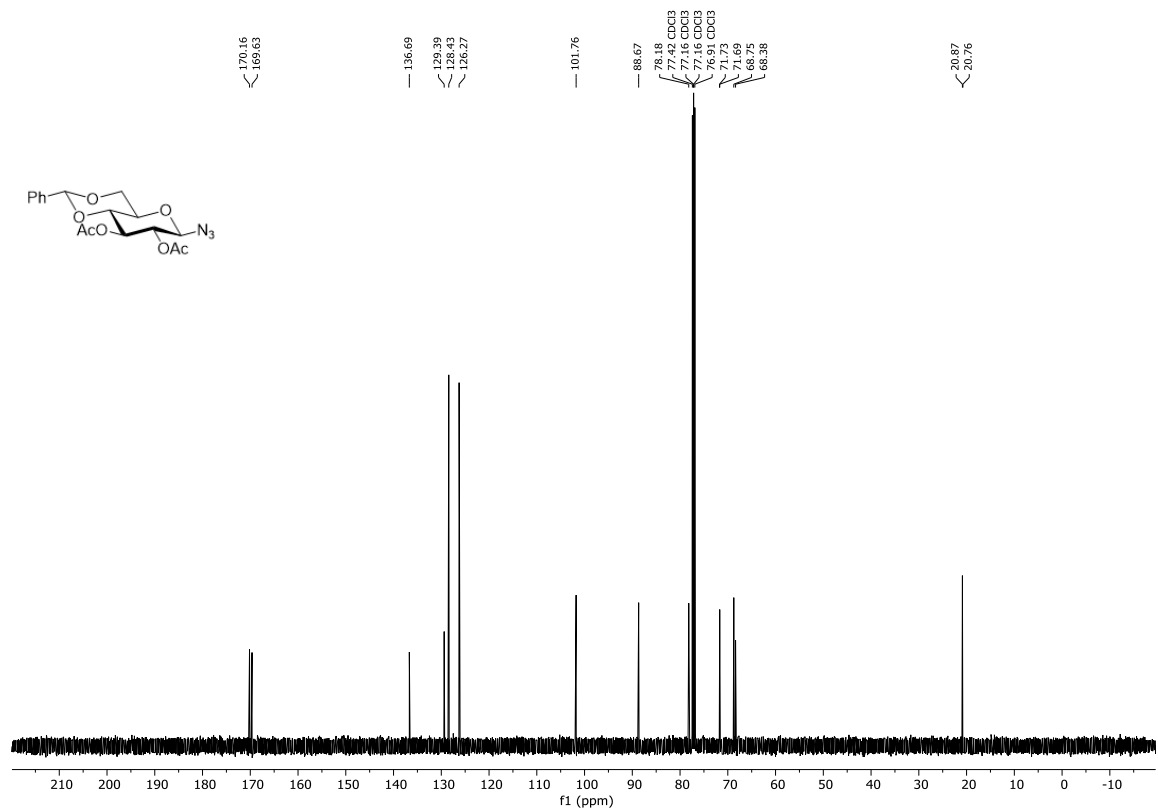

Figure S15. <sup>13</sup>C NMR spectrum of compound 2 (126 MHz, CDCl<sub>3</sub>, 298 K).

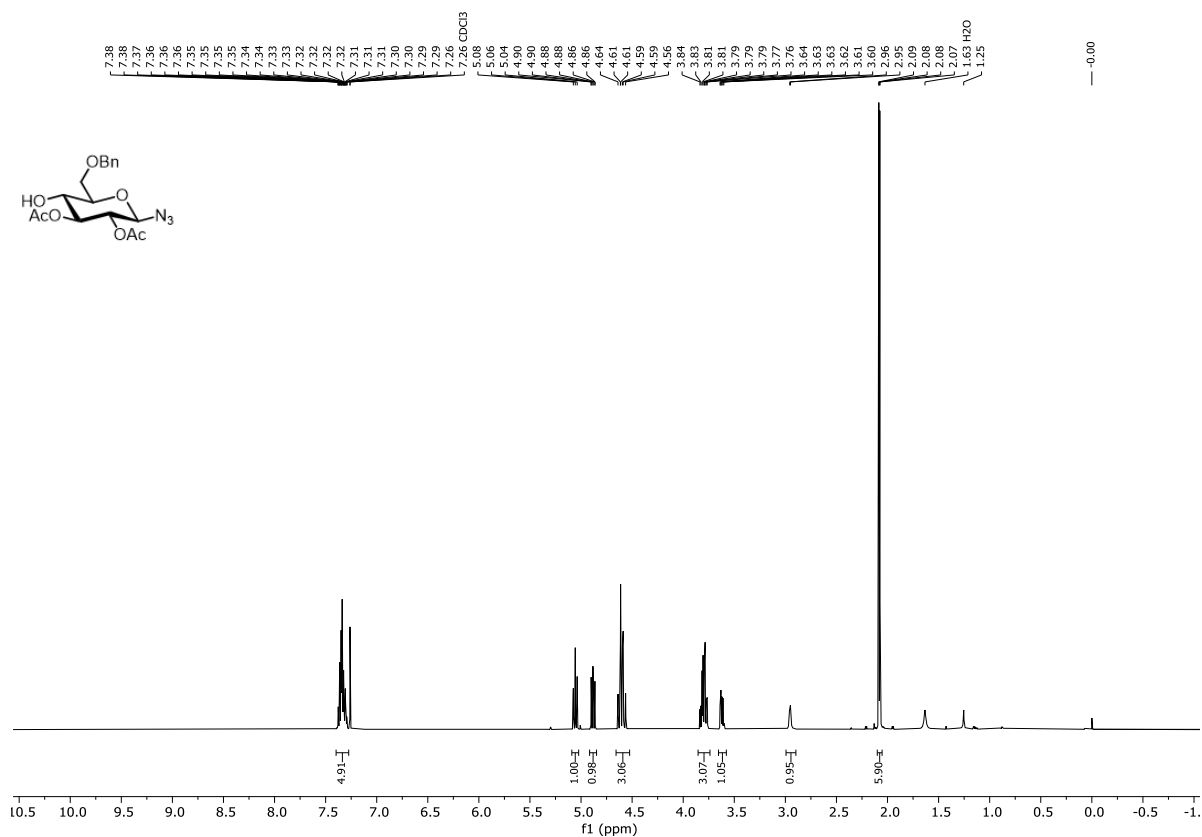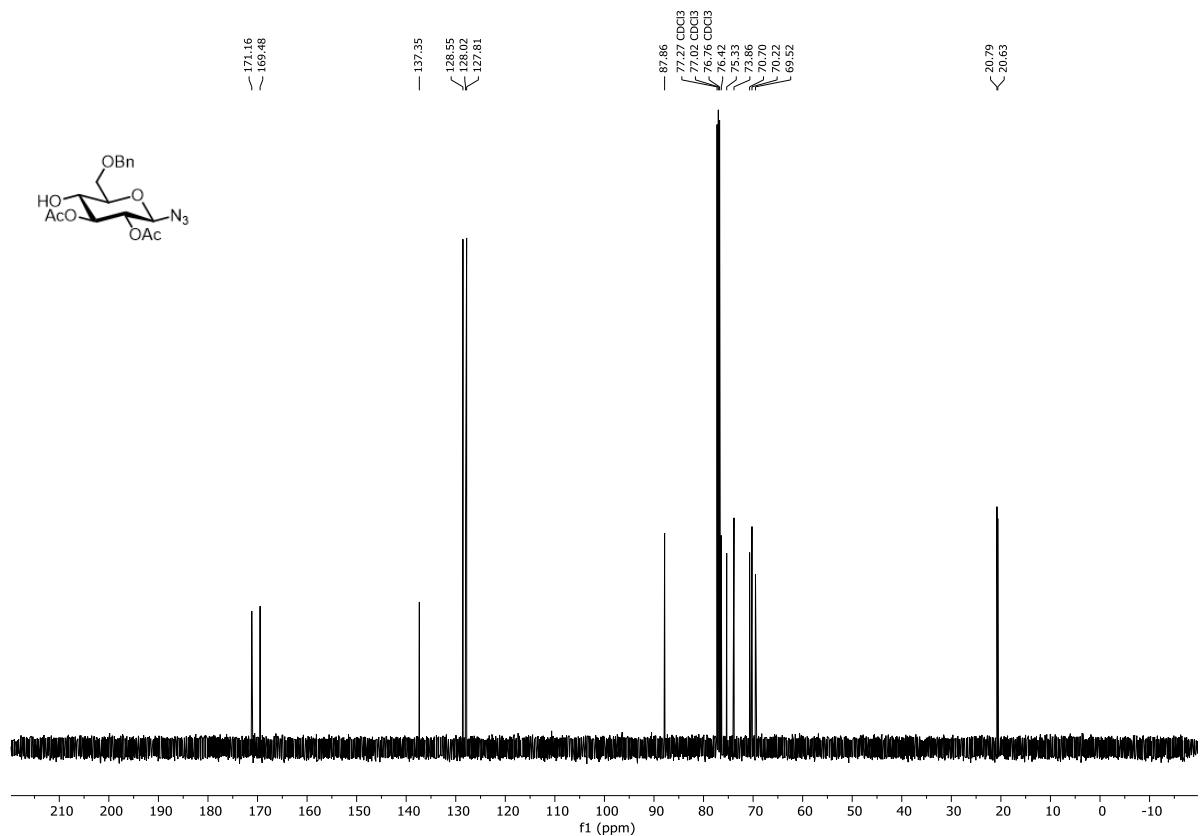

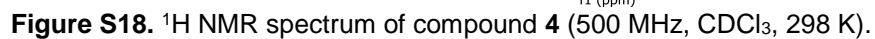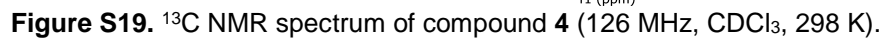

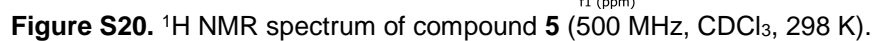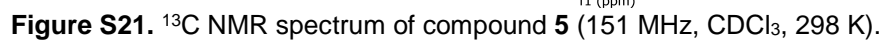

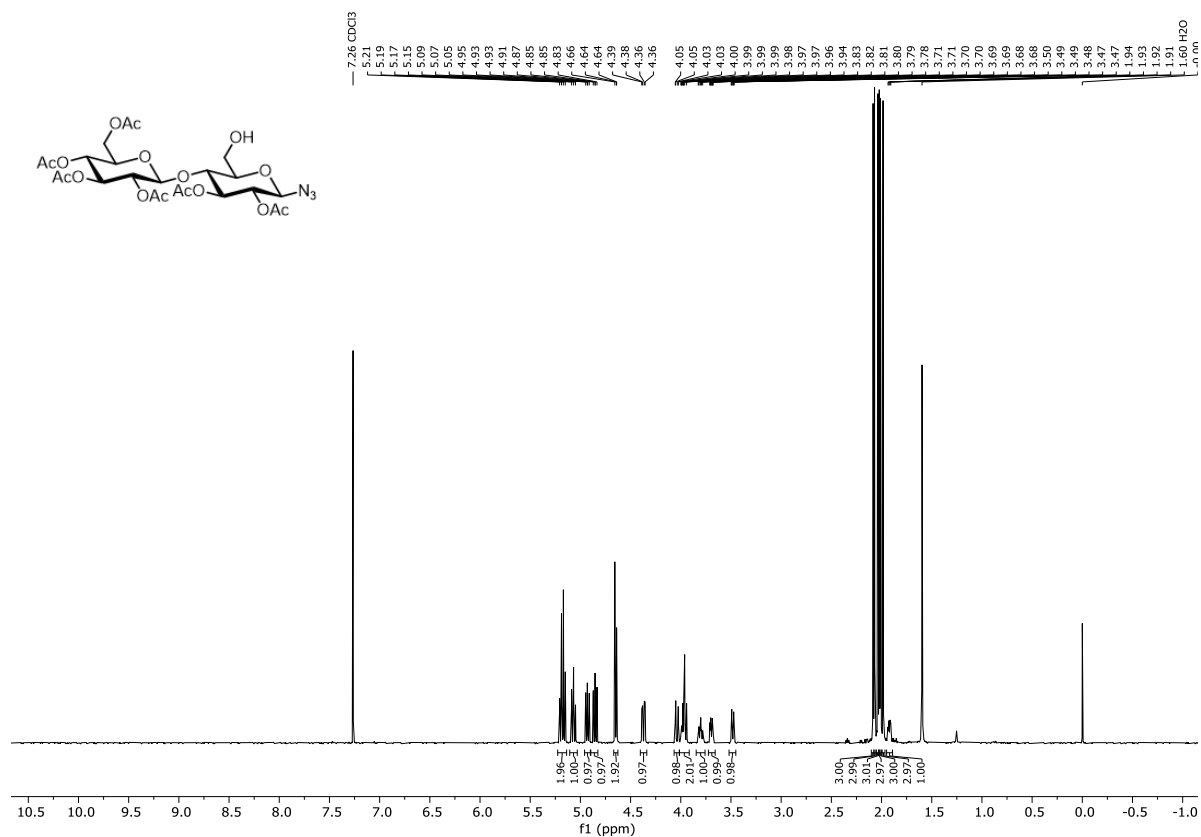

**Figure S22.** <sup>1</sup>H NMR spectrum of compound **6** (500 MHz, CDCl<sub>3</sub>, 298 K).

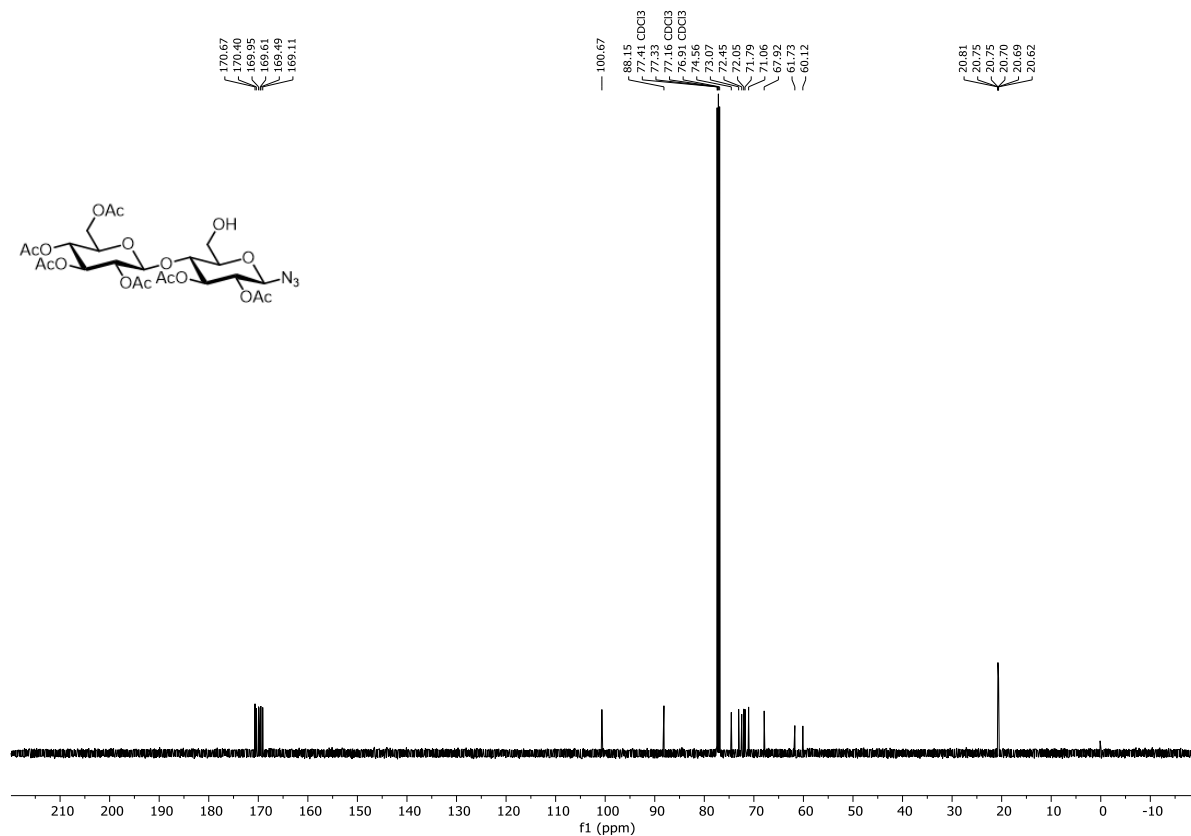

**Figure S23.** <sup>13</sup>C NMR spectrum of compound **6** (126 MHz, CDCl<sub>3</sub>, 298 K).

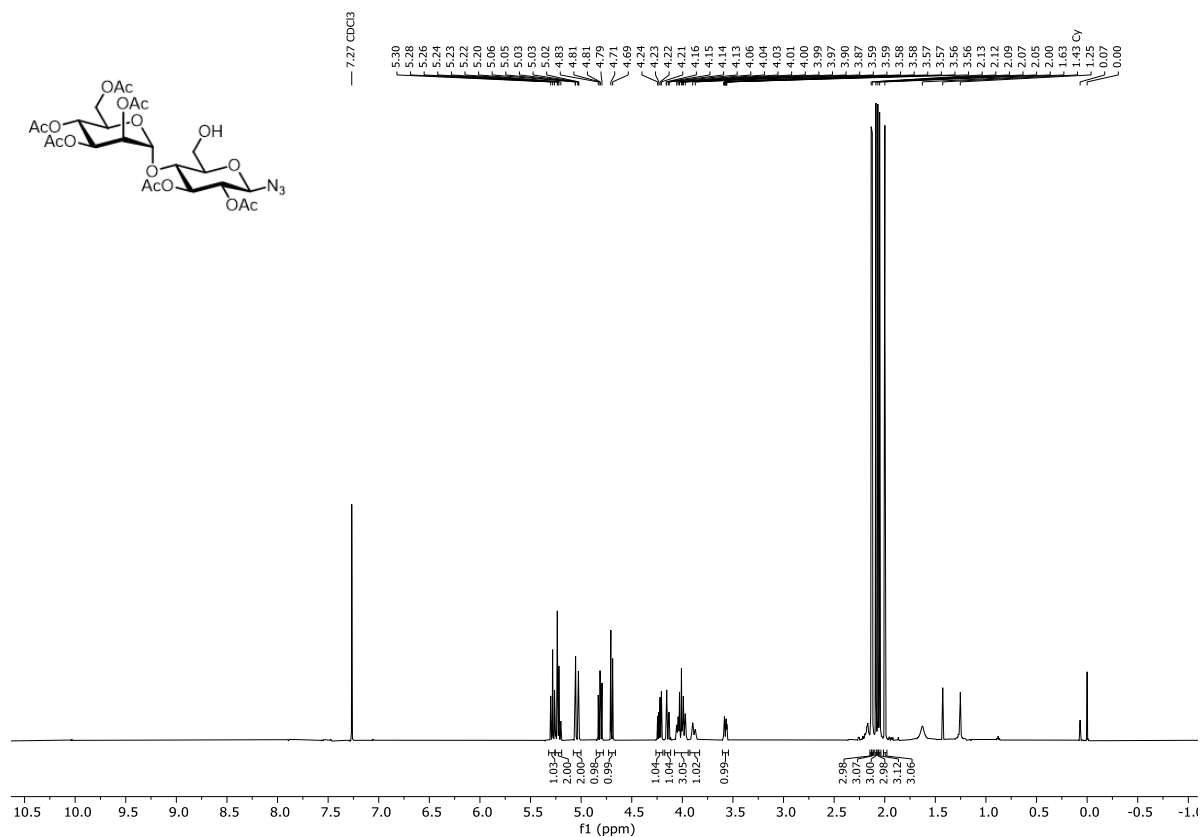

Figure S24. <sup>1</sup>H NMR spectrum of compound 7 (500 MHz, CDCl<sub>3</sub>, 298 K).

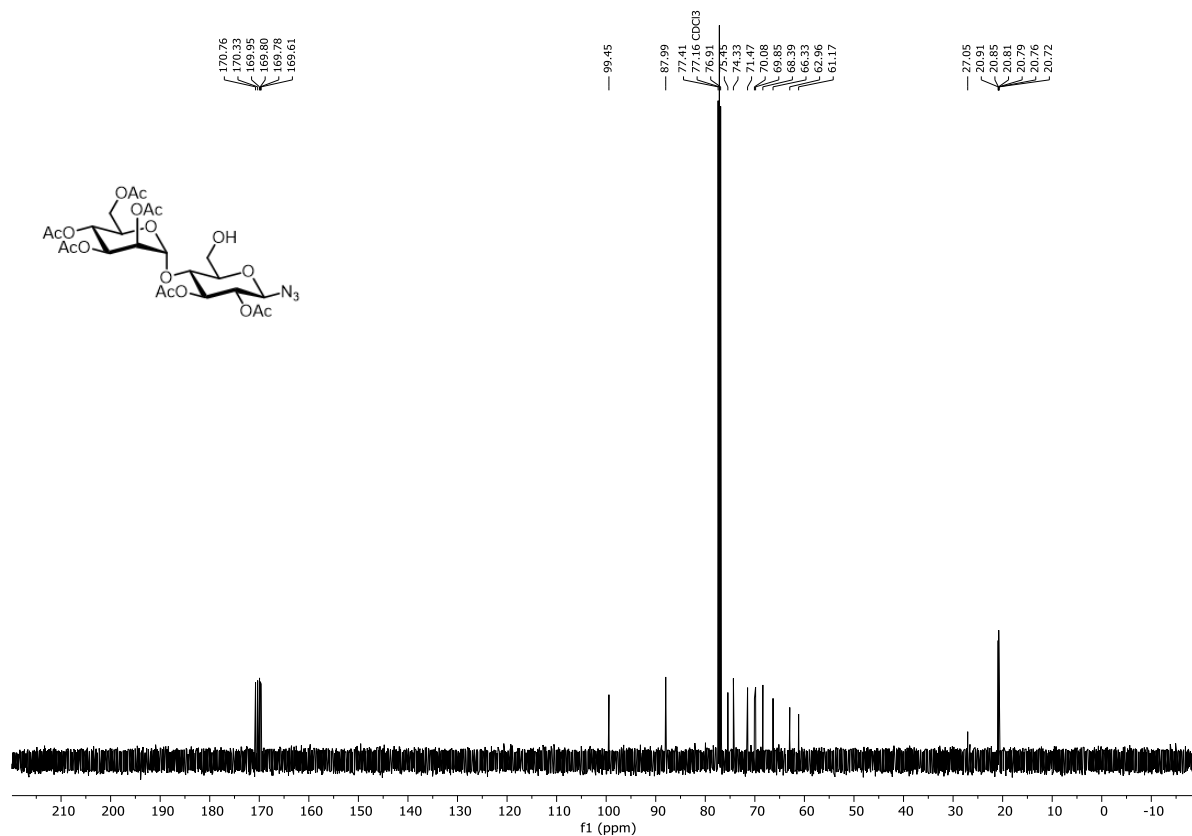

Figure S25. <sup>13</sup>C NMR spectrum of compound 7 (126 MHz, CDCl<sub>3</sub>, 298 K).

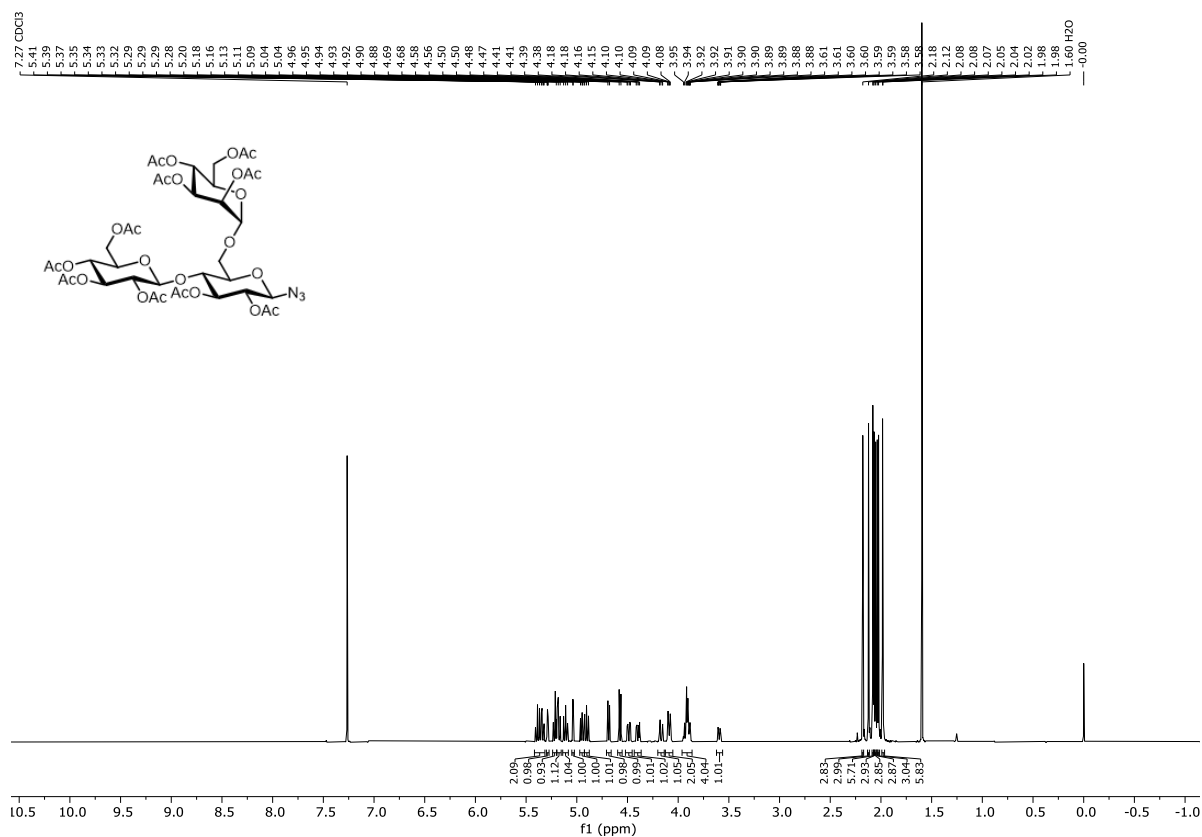

Figure S26. <sup>1</sup>H NMR spectrum of compound 8 (500 MHz, CDCl<sub>3</sub>, 298 K).

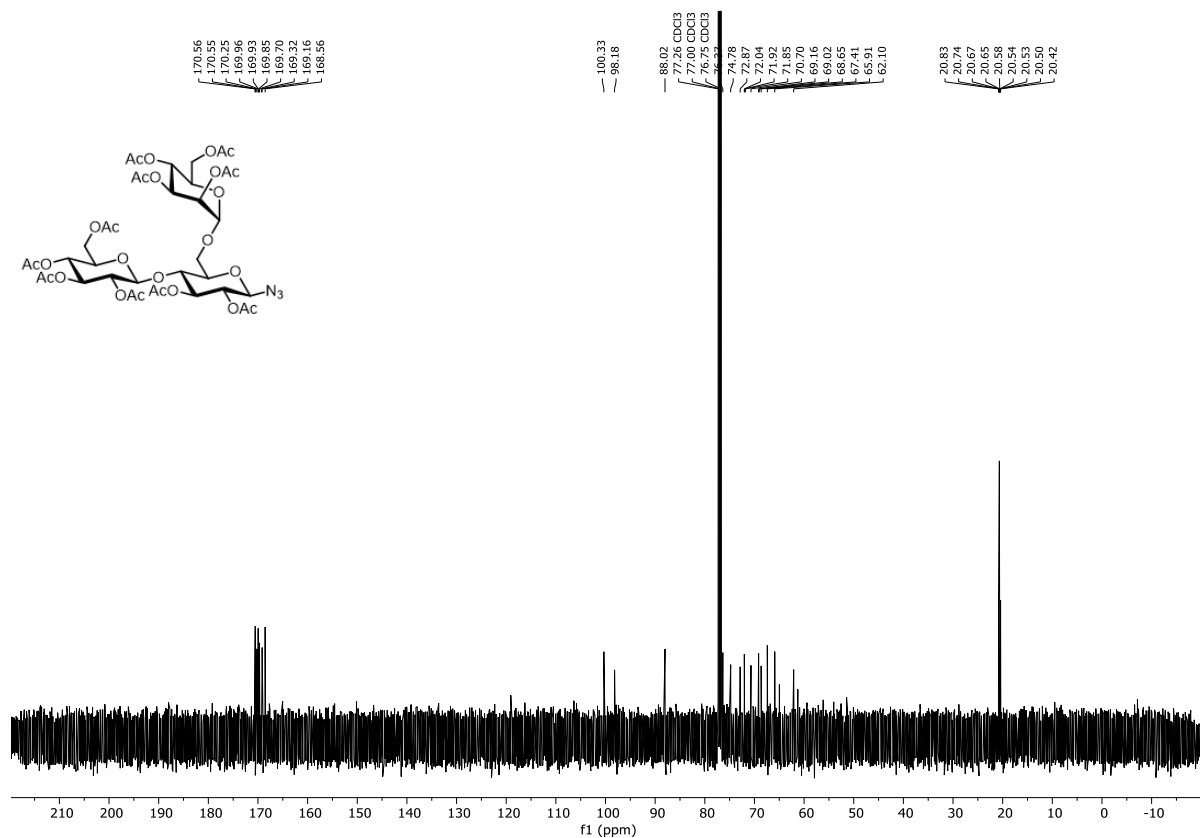

Figure S27. <sup>13</sup>C NMR spectrum of compound 8 (126 MHz, CDCl<sub>3</sub>, 298 K).

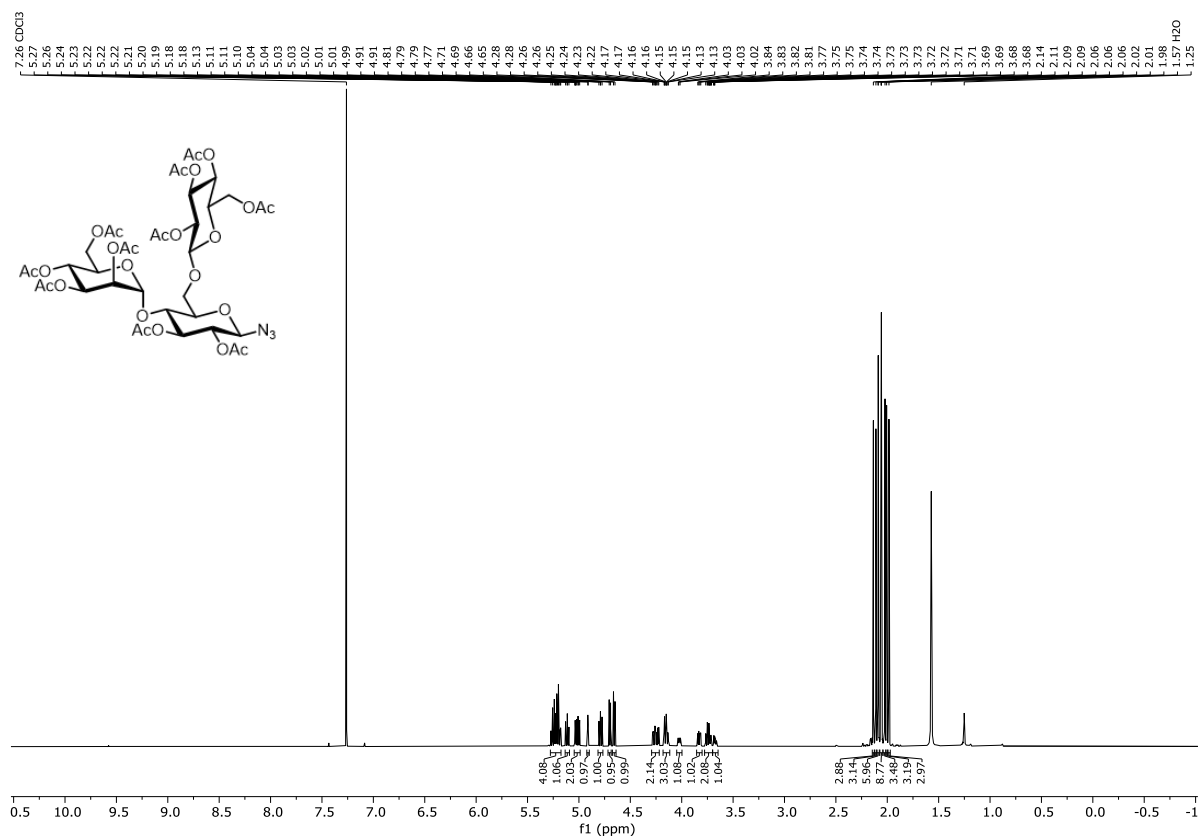

**Figure S28.** <sup>1</sup>H NMR spectrum of compound **9** (600 MHz, CDCl<sub>3</sub>, 298 K).

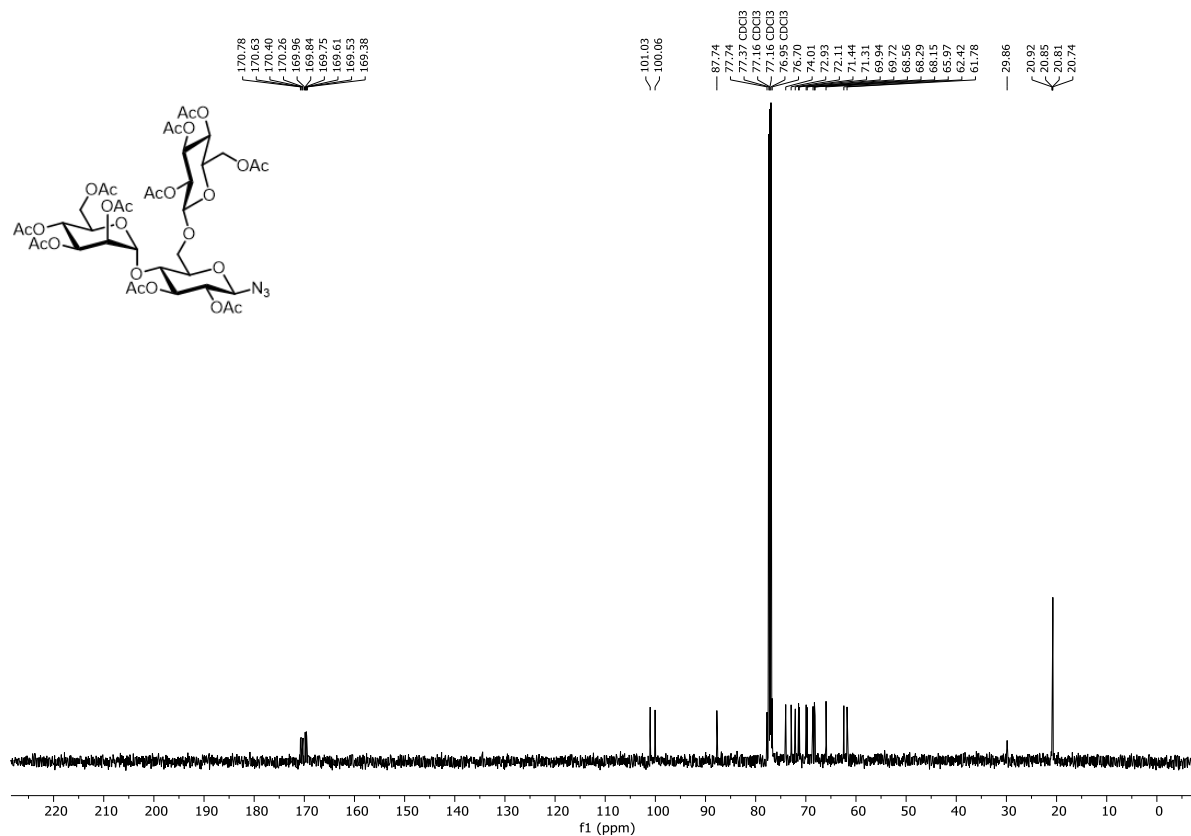

**Figure S29.** <sup>13</sup>C NMR spectrum of compound **9** (151 MHz, CDCl<sub>3</sub>, 298 K).



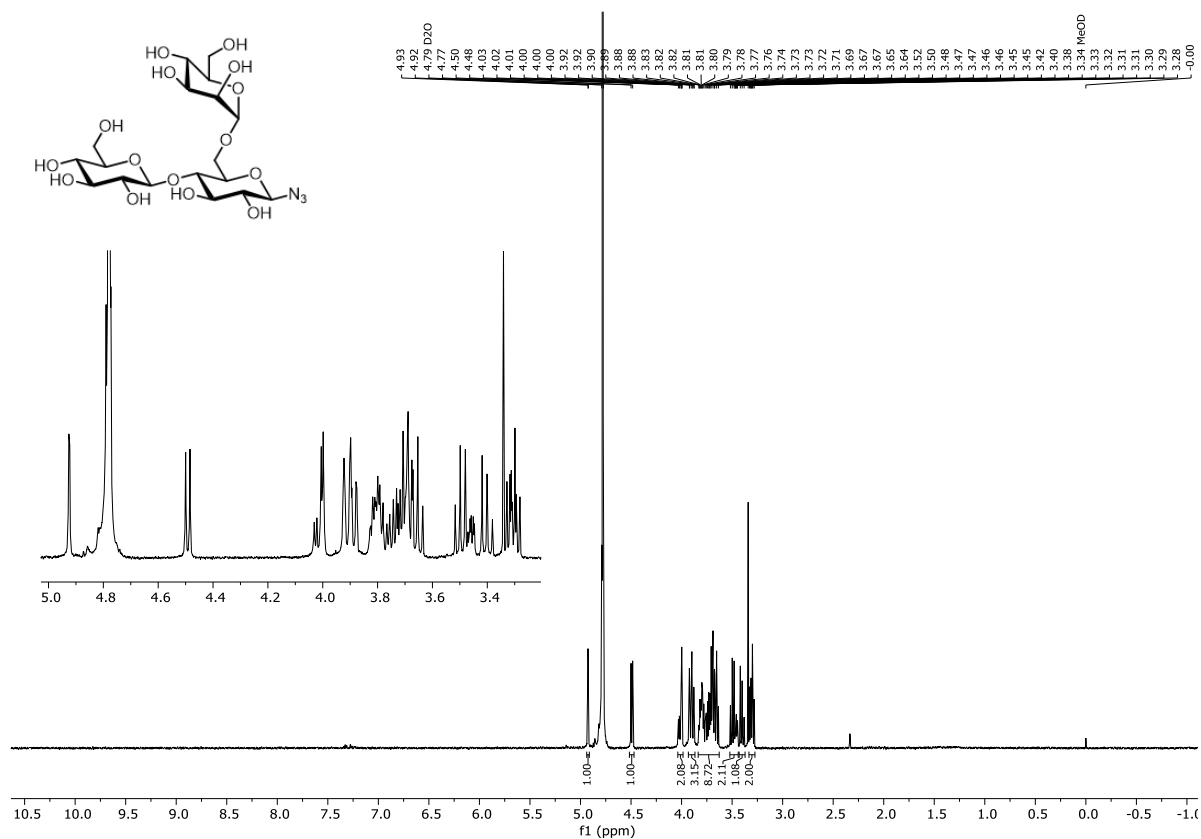

**Figure S30.** <sup>1</sup>H NMR spectrum of compound **10** (500 MHz, D<sub>2</sub>O, 298 K).

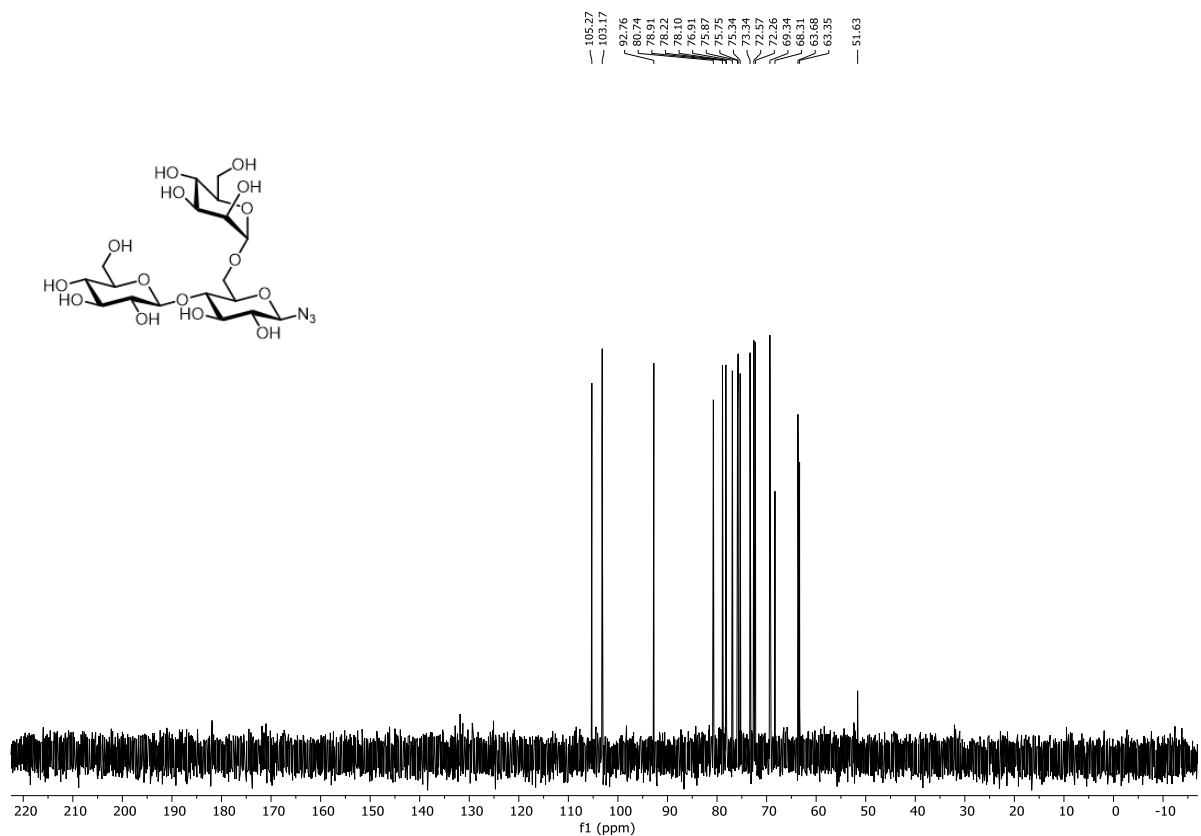

**Figure S31.** <sup>13</sup>C NMR spectrum of compound **10** (126 MHz, D<sub>2</sub>O, 298 K).

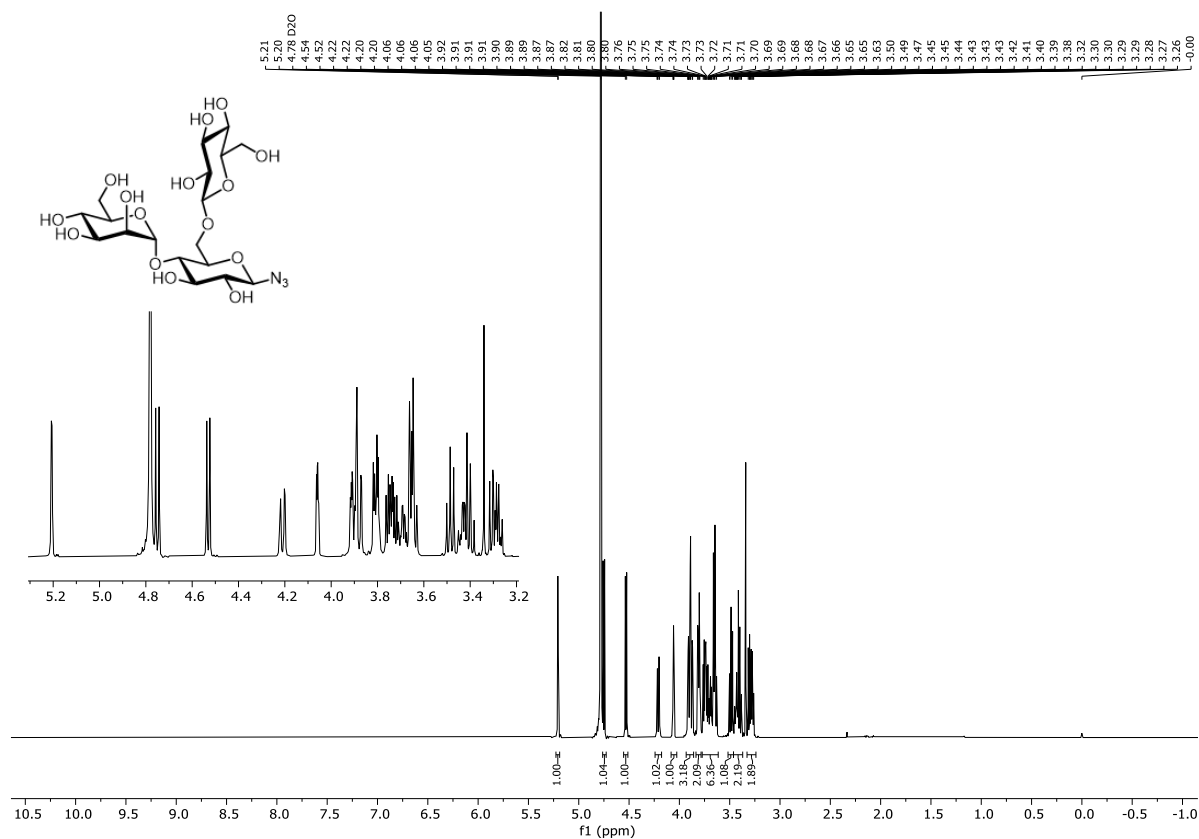

**Figure S32.** <sup>1</sup>H NMR spectrum of compound **11** (600 MHz, H<sub>2</sub>O, 298 K).

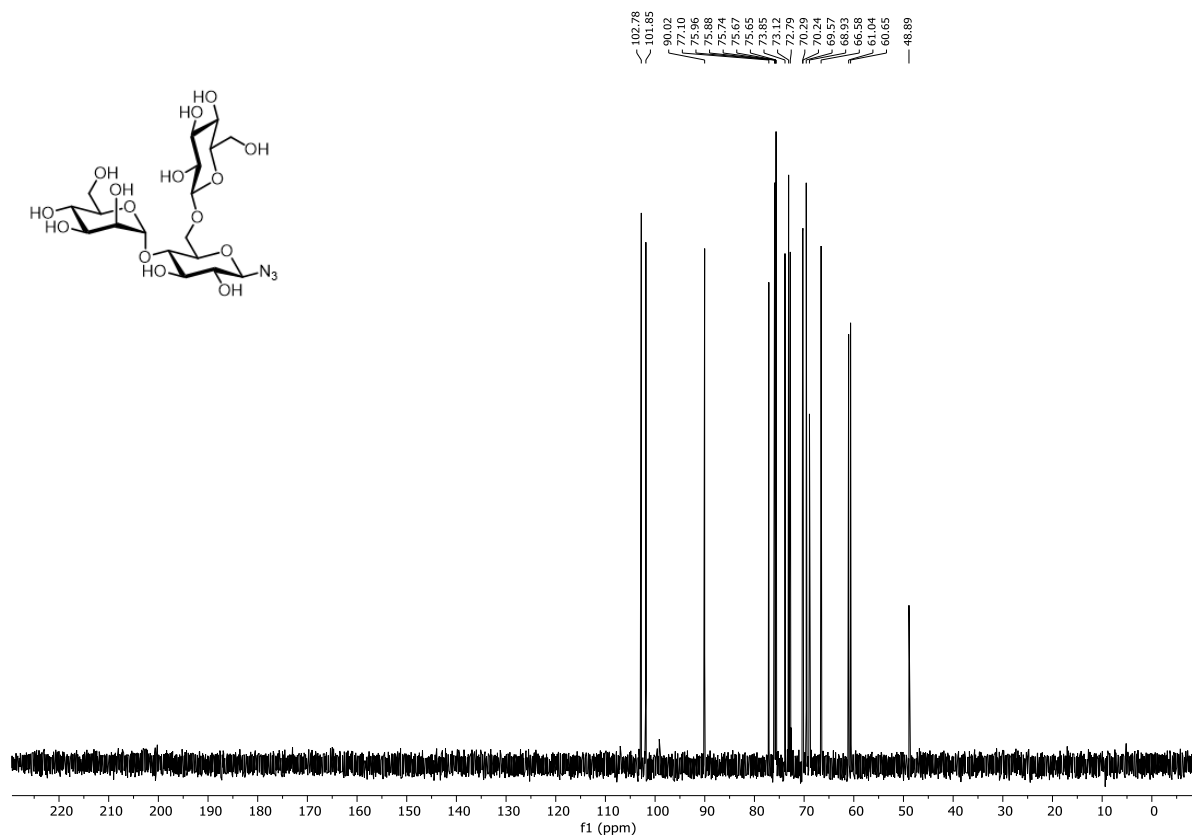

**Figure S33.** <sup>13</sup>C NMR spectrum of compound **11** (151 MHz, H<sub>2</sub>O, 298 K).

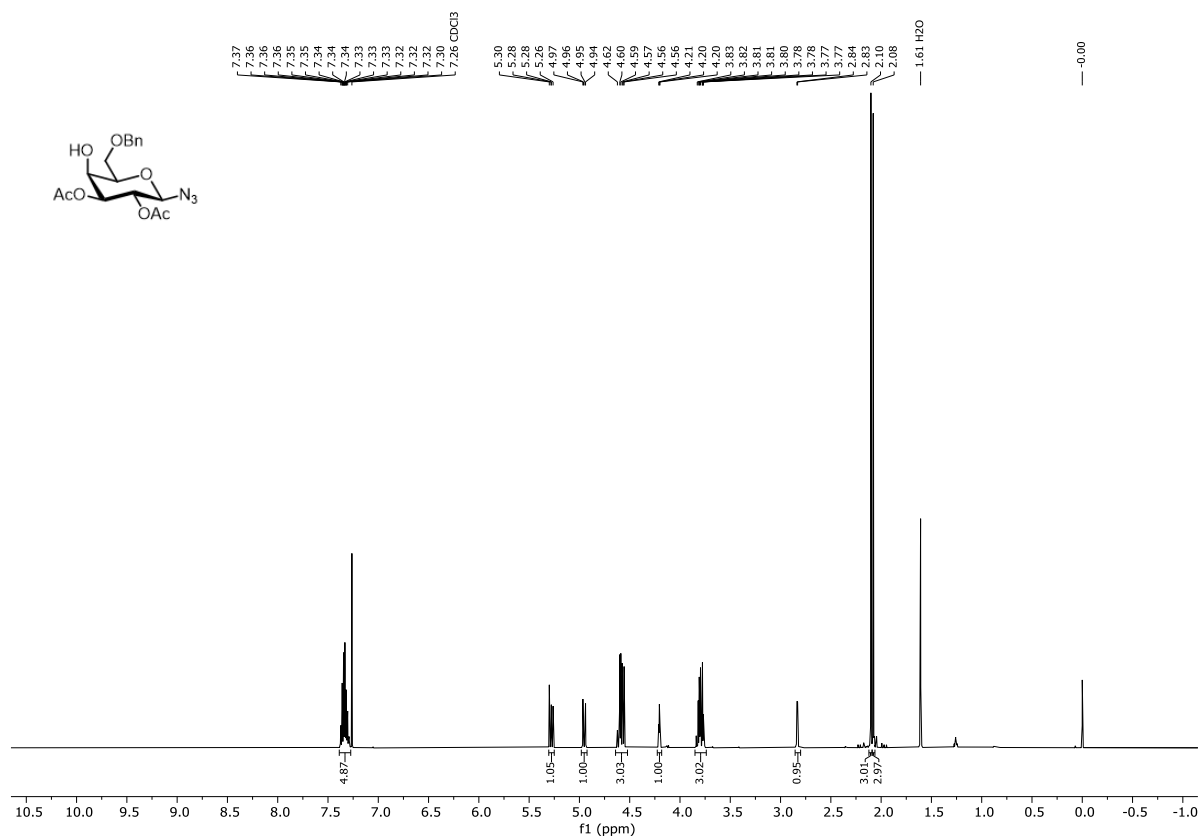

**Figure S34.** <sup>1</sup>H NMR spectrum of compound **13** (500 MHz, CDCl<sub>3</sub>, 298 K).

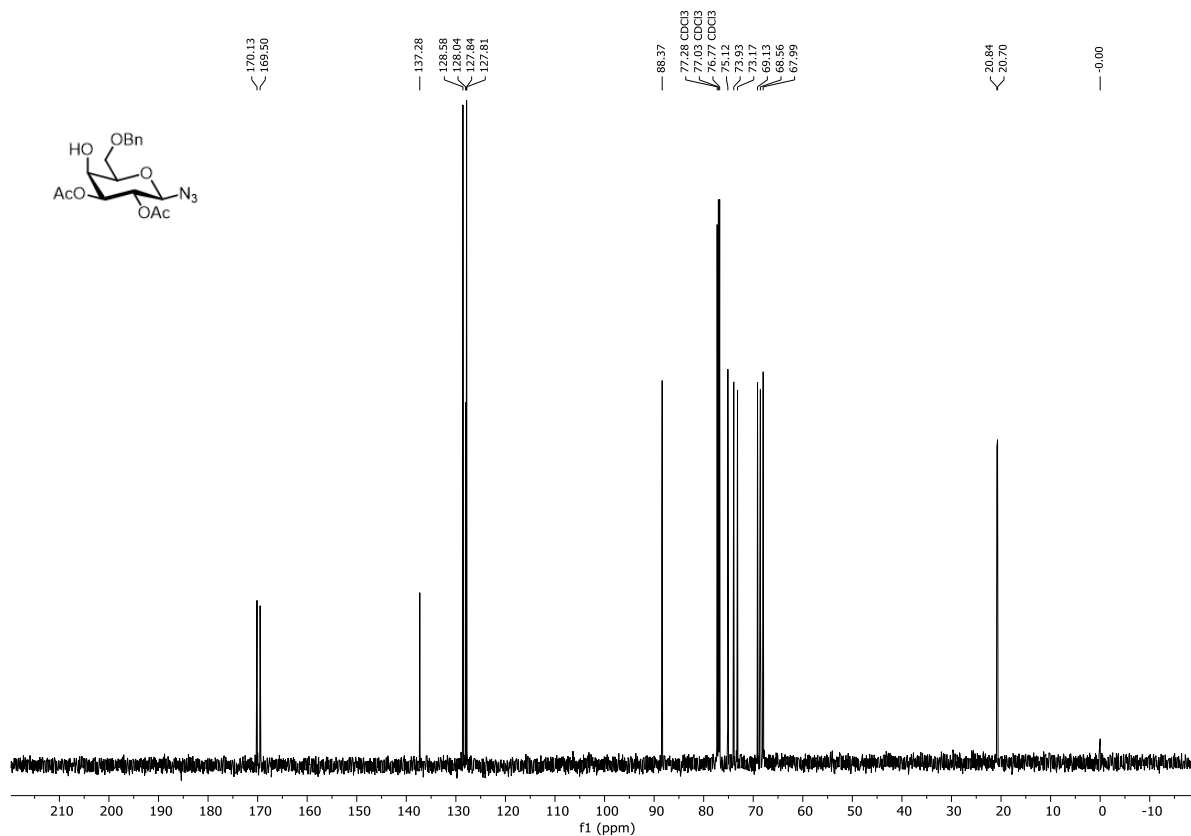

**Figure S35.** <sup>13</sup>C NMR spectrum of compound **13** (126 MHz, CDCl<sub>3</sub>, 298 K).

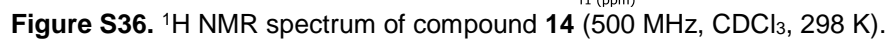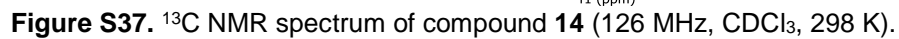

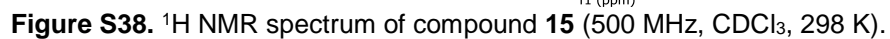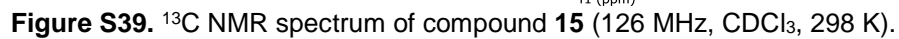



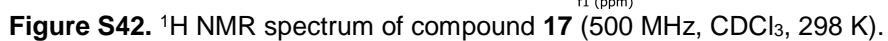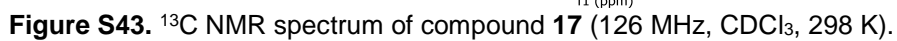

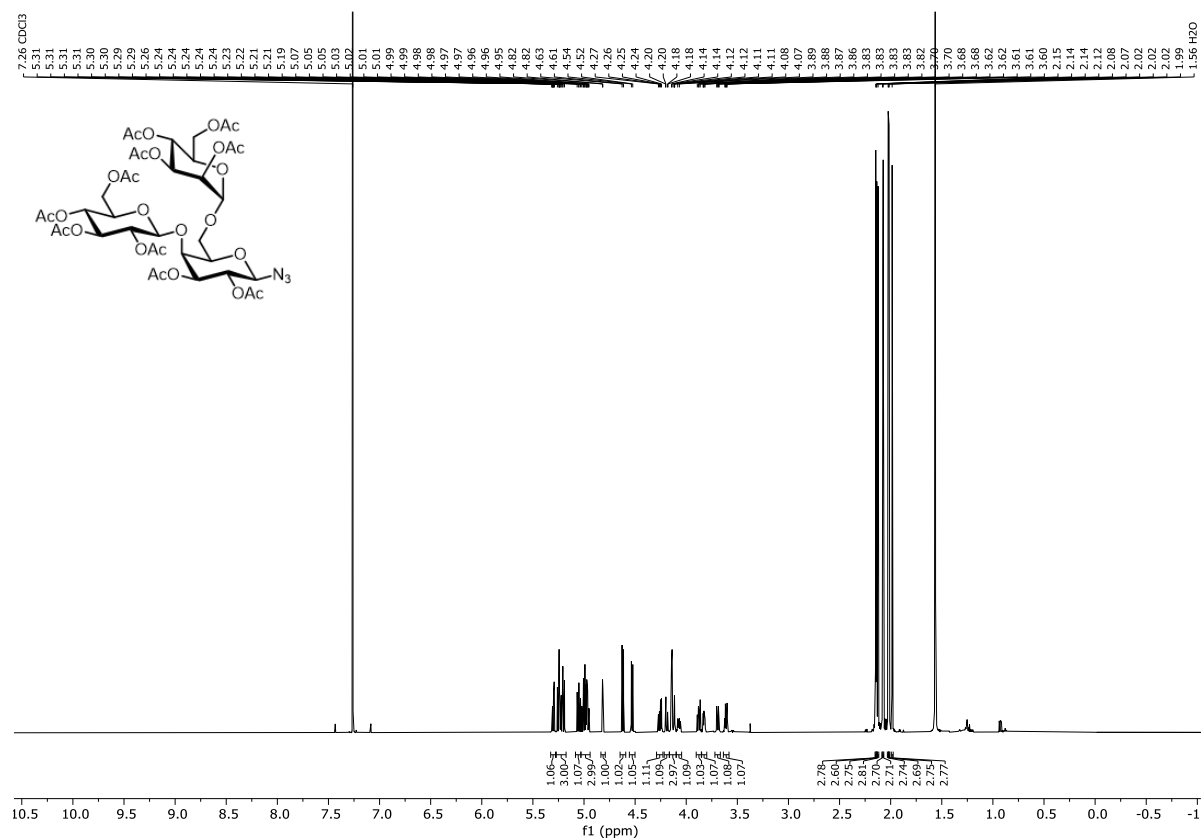

**Figure S44.** <sup>1</sup>H NMR spectrum of compound **18** (600 MHz, CDCl<sub>3</sub>, 298 K).

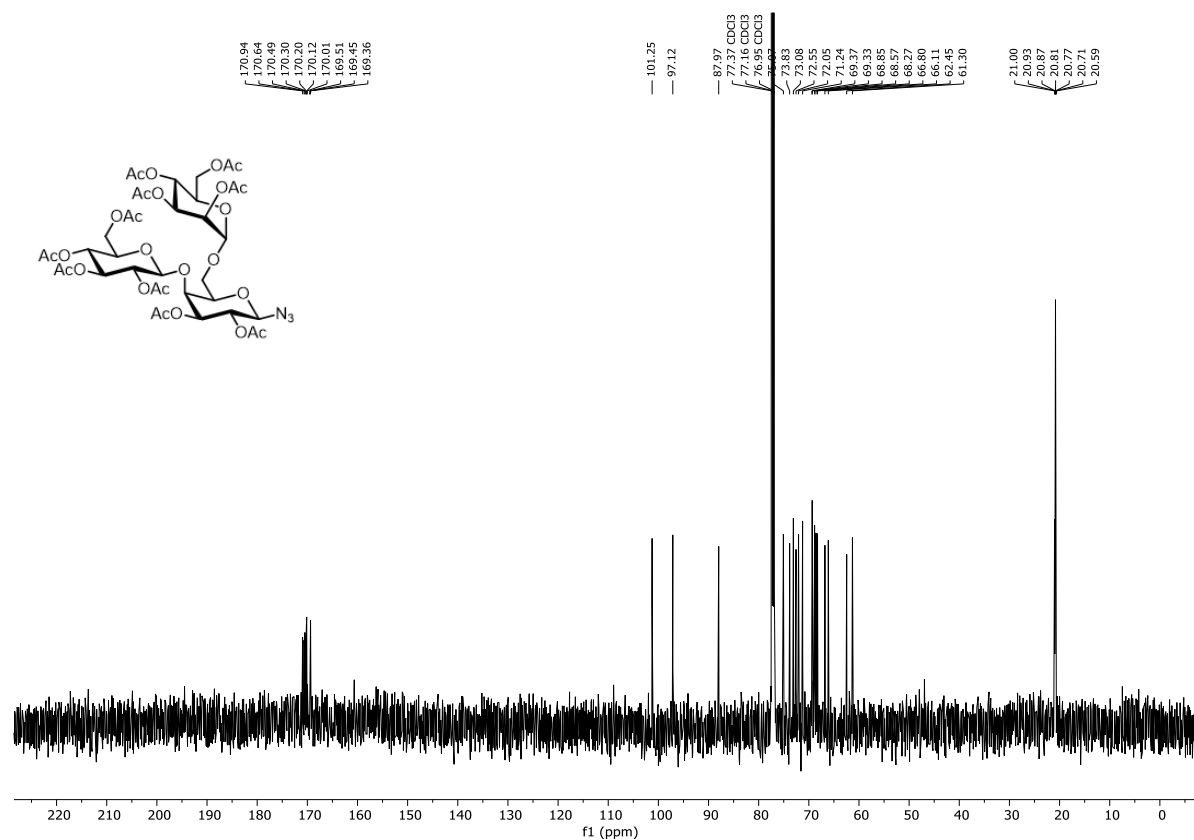

**Figure S45.** <sup>13</sup>C NMR spectrum of compound **18** (151 MHz, CDCl<sub>3</sub>, 298 K).



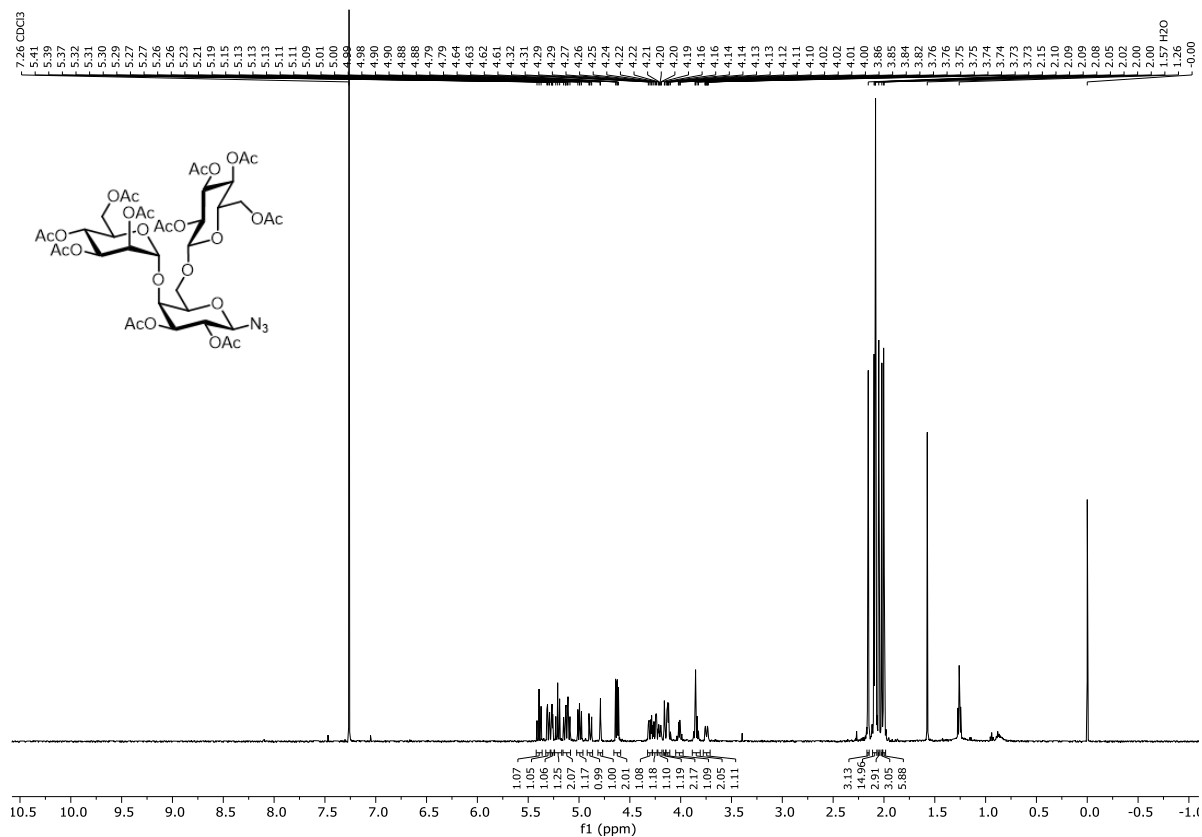

**Figure S46.**  $^1\text{H}$  NMR spectrum of compound **19** (500 MHz,  $\text{CDCl}_3$ , 298 K).

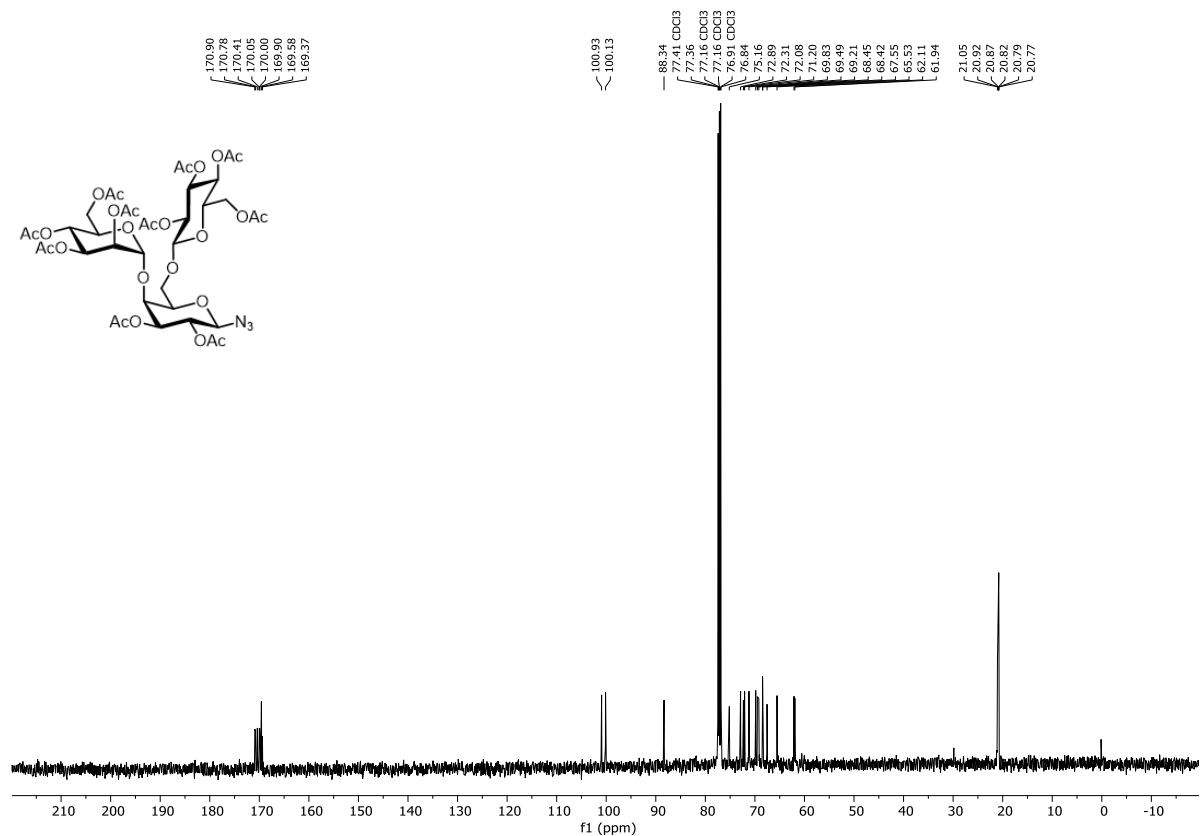

**Figure S47.**  $^{13}\text{C}$  NMR spectrum of compound **19** (126 MHz,  $\text{CDCl}_3$ , 298 K).

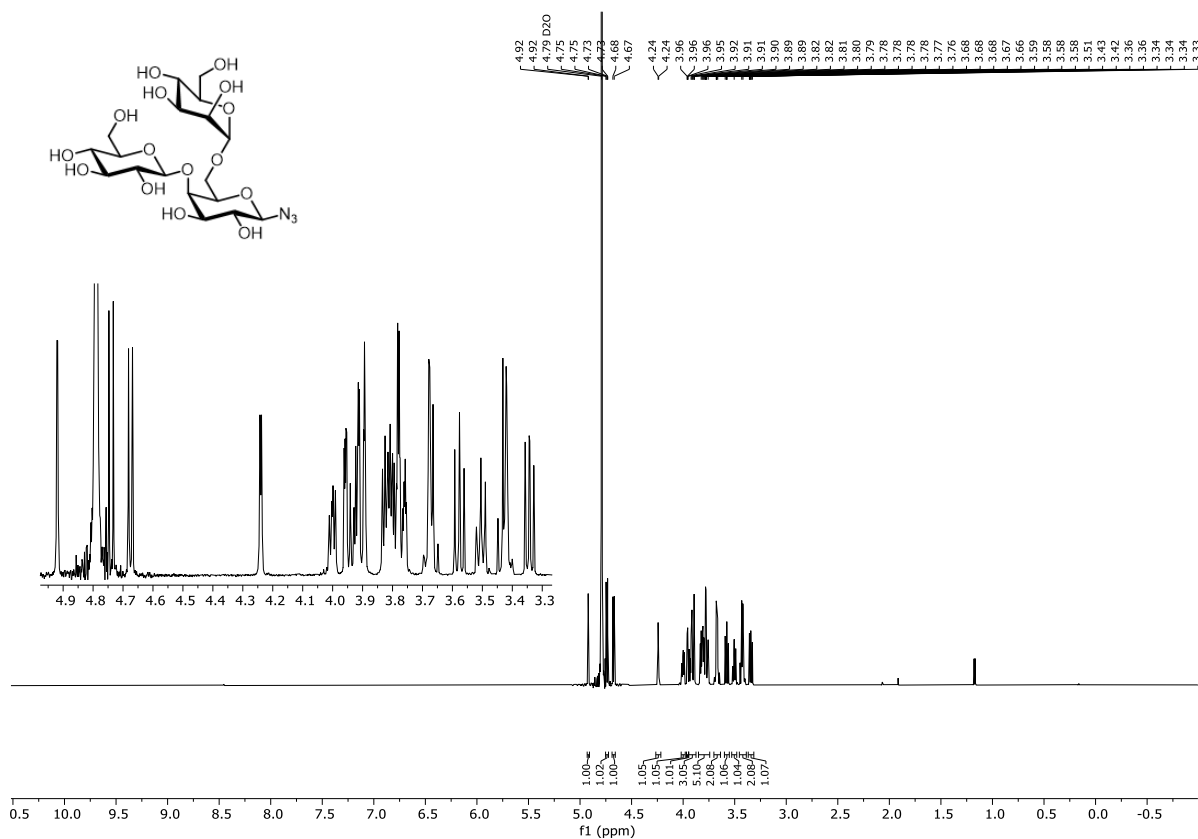

**Figure S48.** <sup>1</sup>H NMR spectrum of compound **20** (600 MHz, D<sub>2</sub>O, 298 K).

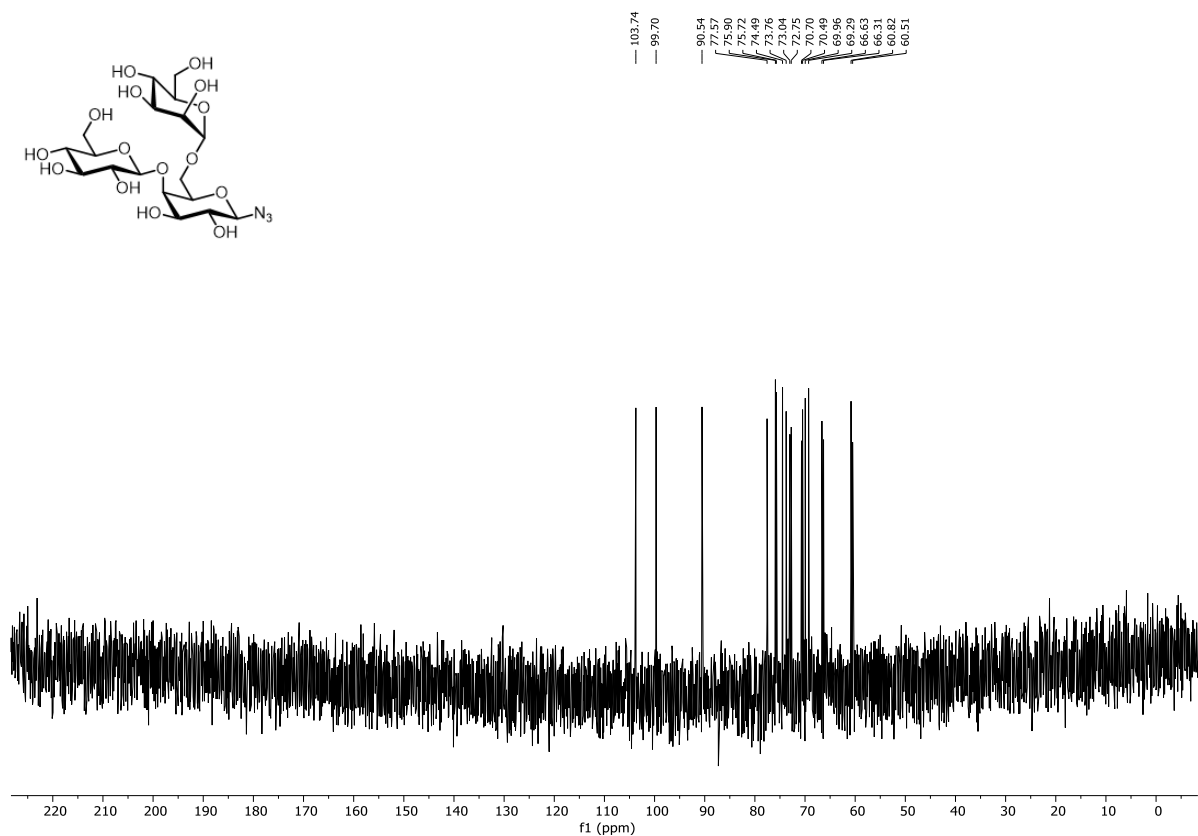

**Figure S49.** <sup>13</sup>C NMR spectrum of compound **20** (151 MHz, D<sub>2</sub>O, 298 K).

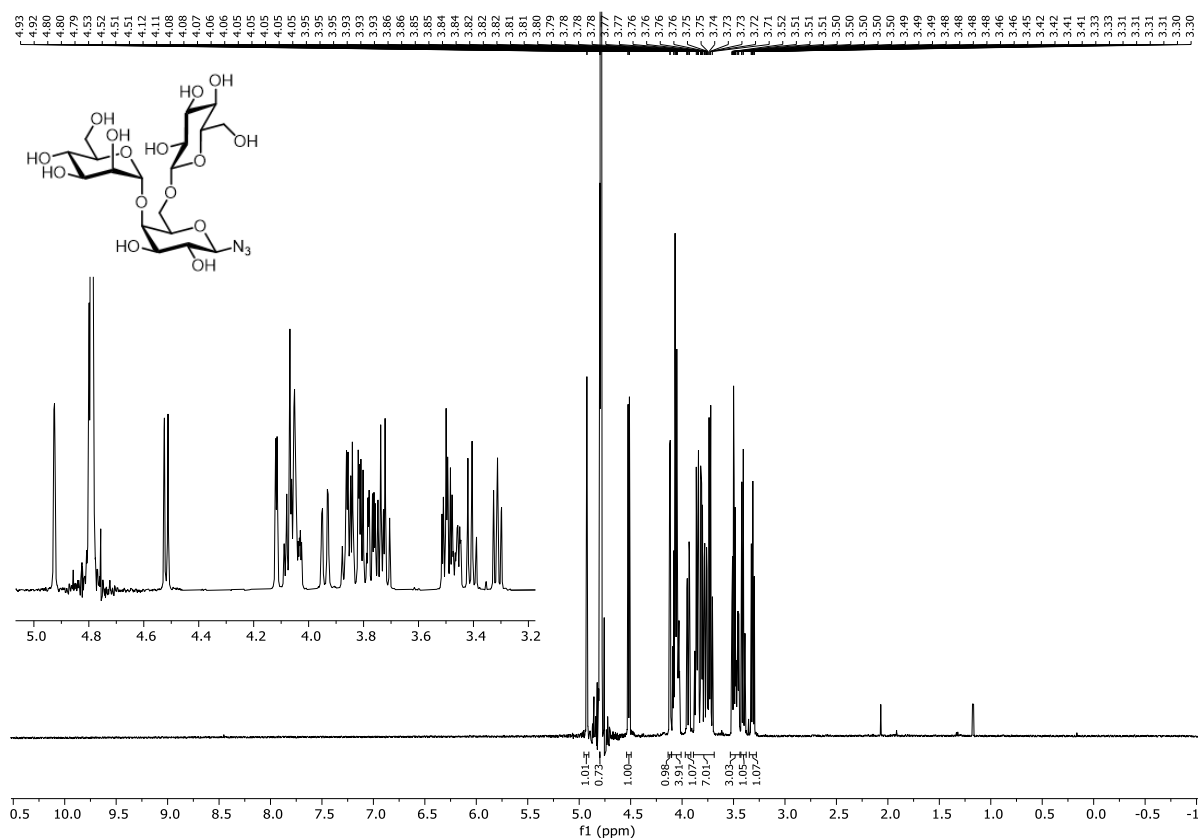

**Figure S50.** <sup>1</sup>H NMR spectrum of compound **21** (600 MHz, D<sub>2</sub>O, 298 K).

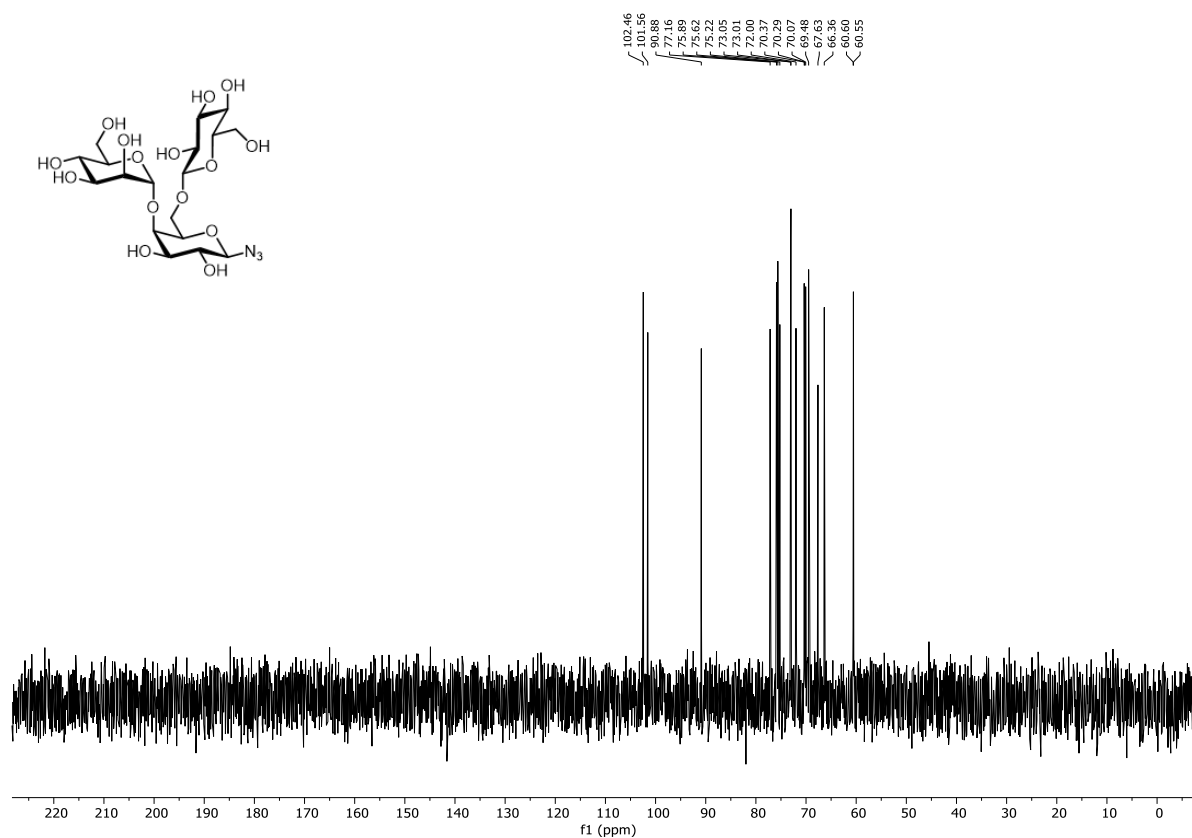

**Figure S51.** <sup>13</sup>C NMR spectrum of compound **21** (151 MHz, D<sub>2</sub>O, 298 K).

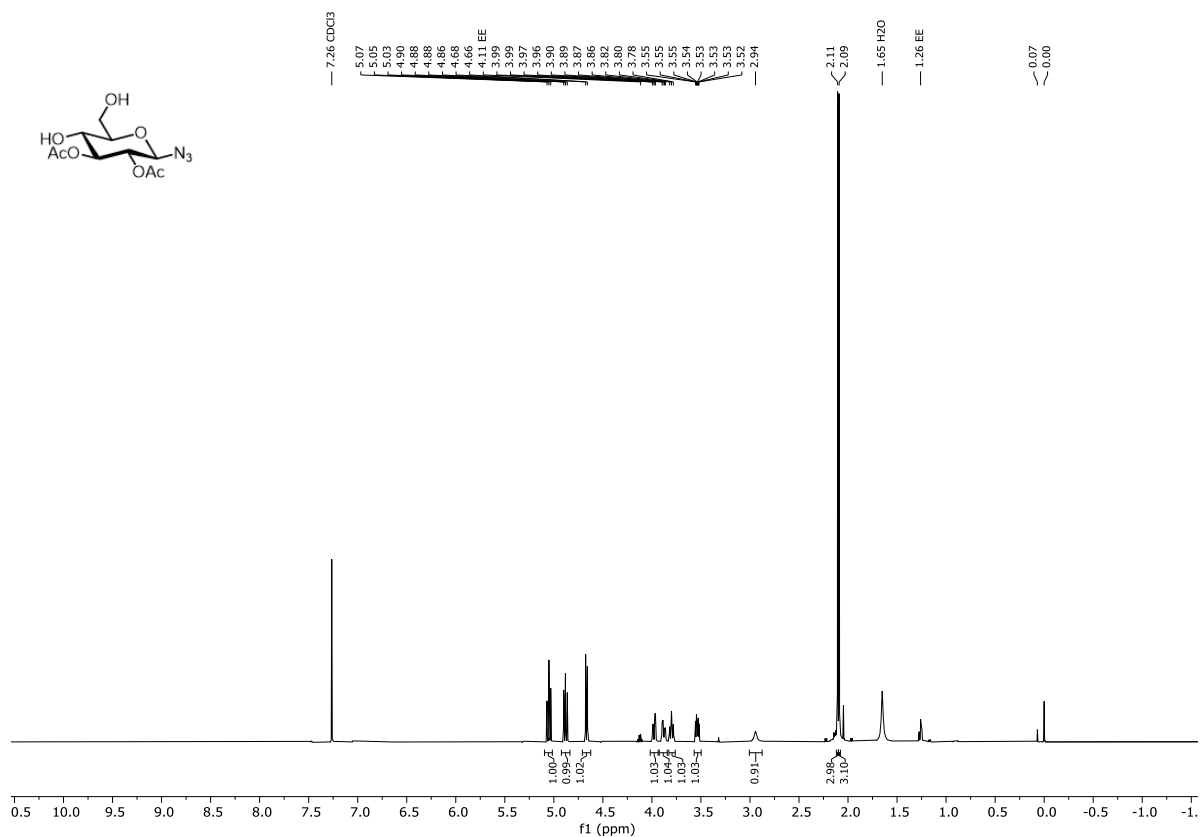

**Figure S52.** <sup>1</sup>H NMR spectrum of compound **22** (500 MHz, CDCl<sub>3</sub>, 298 K).

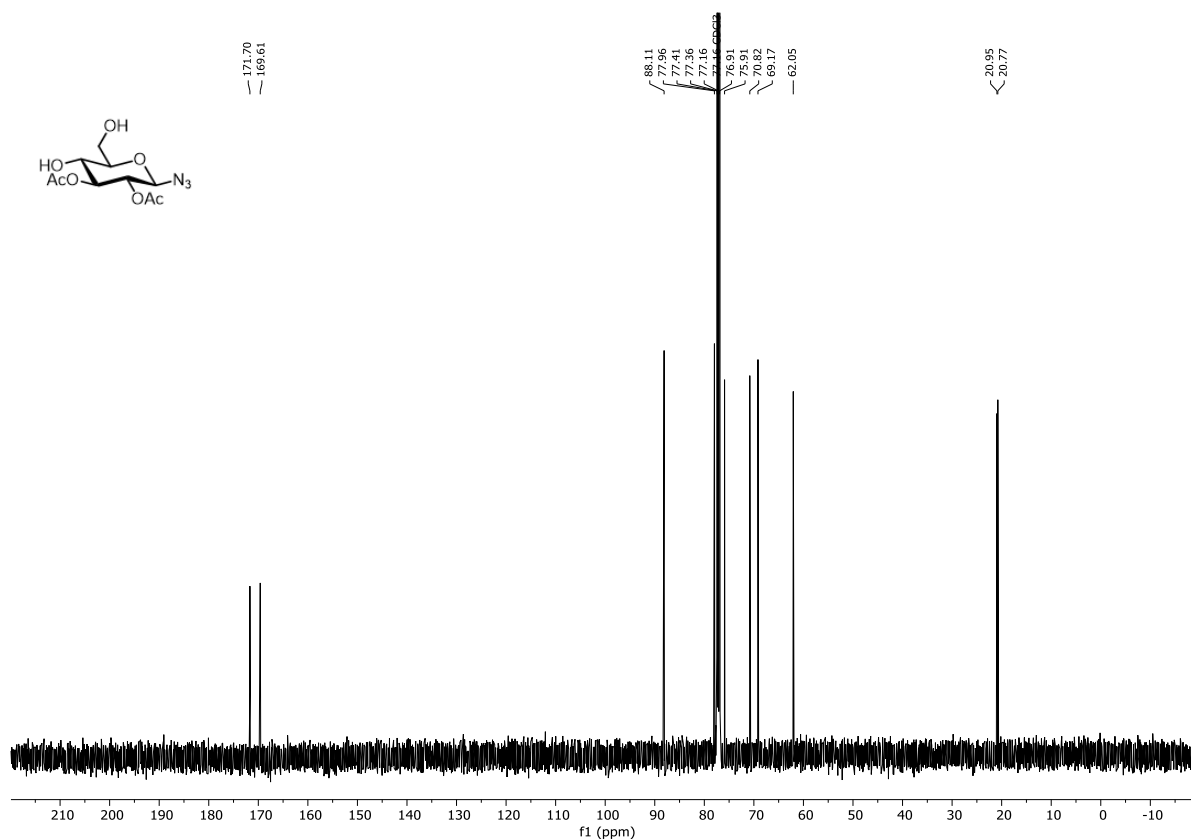

**Figure S53.** <sup>13</sup>C NMR spectrum of compound **22** (126 MHz, CDCl<sub>3</sub>, 298 K).

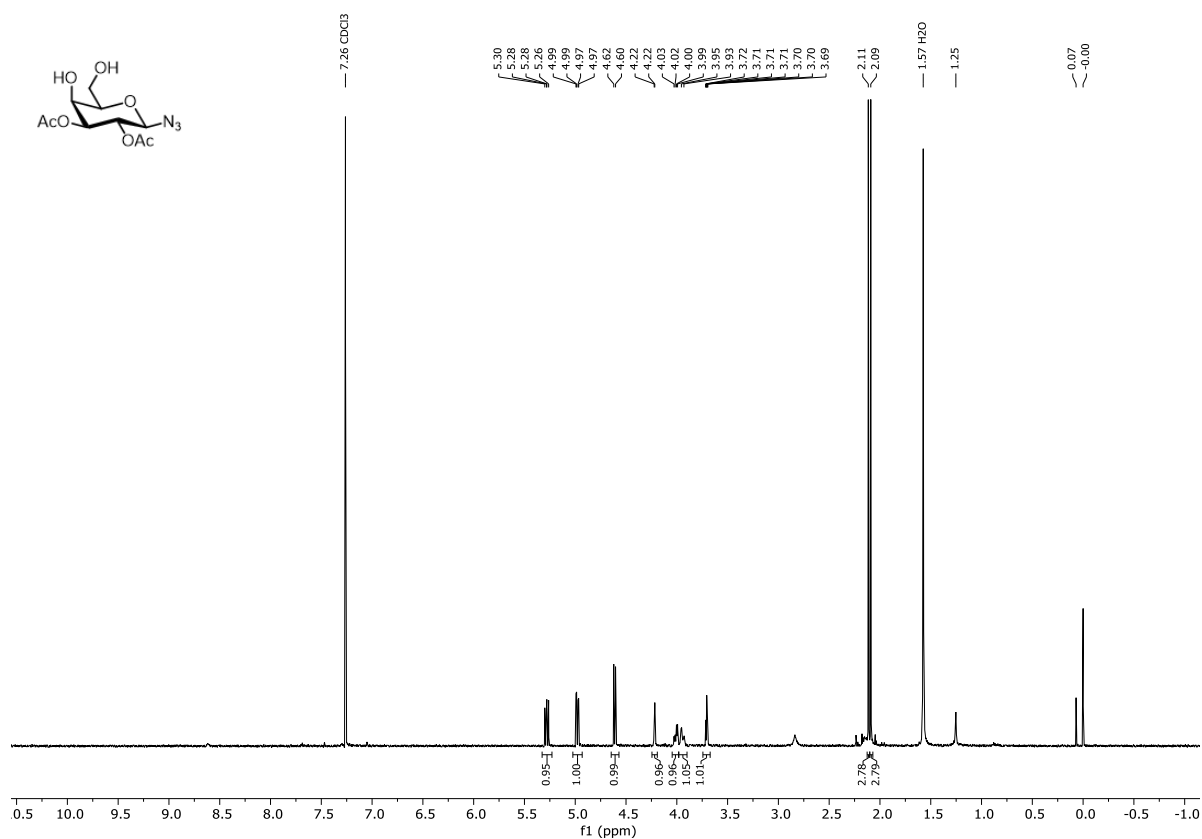

**Figure S54.** <sup>1</sup>H NMR spectrum of compound **23** (500 MHz, CDCl<sub>3</sub>, 298 K).

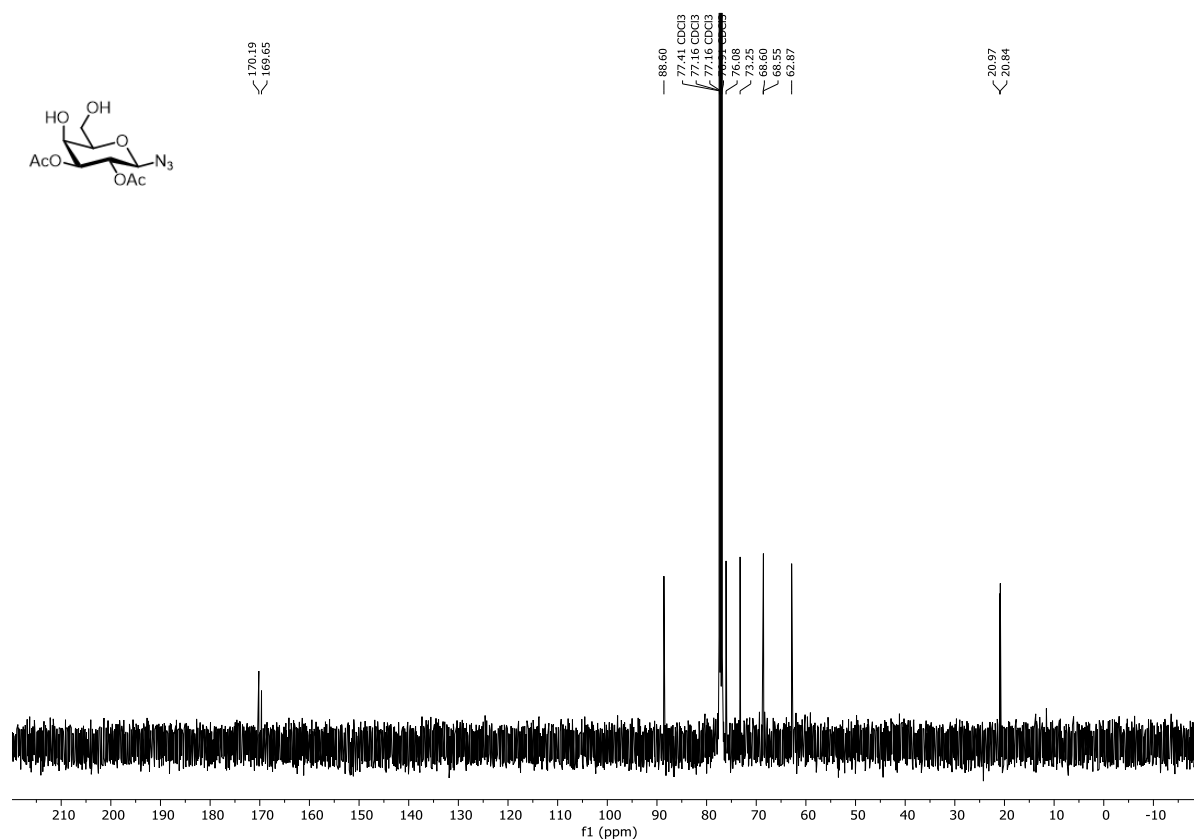

**Figure S55.** <sup>13</sup>C NMR spectrum of compound **23** (126 MHz, CDCl<sub>3</sub>, 298 K).

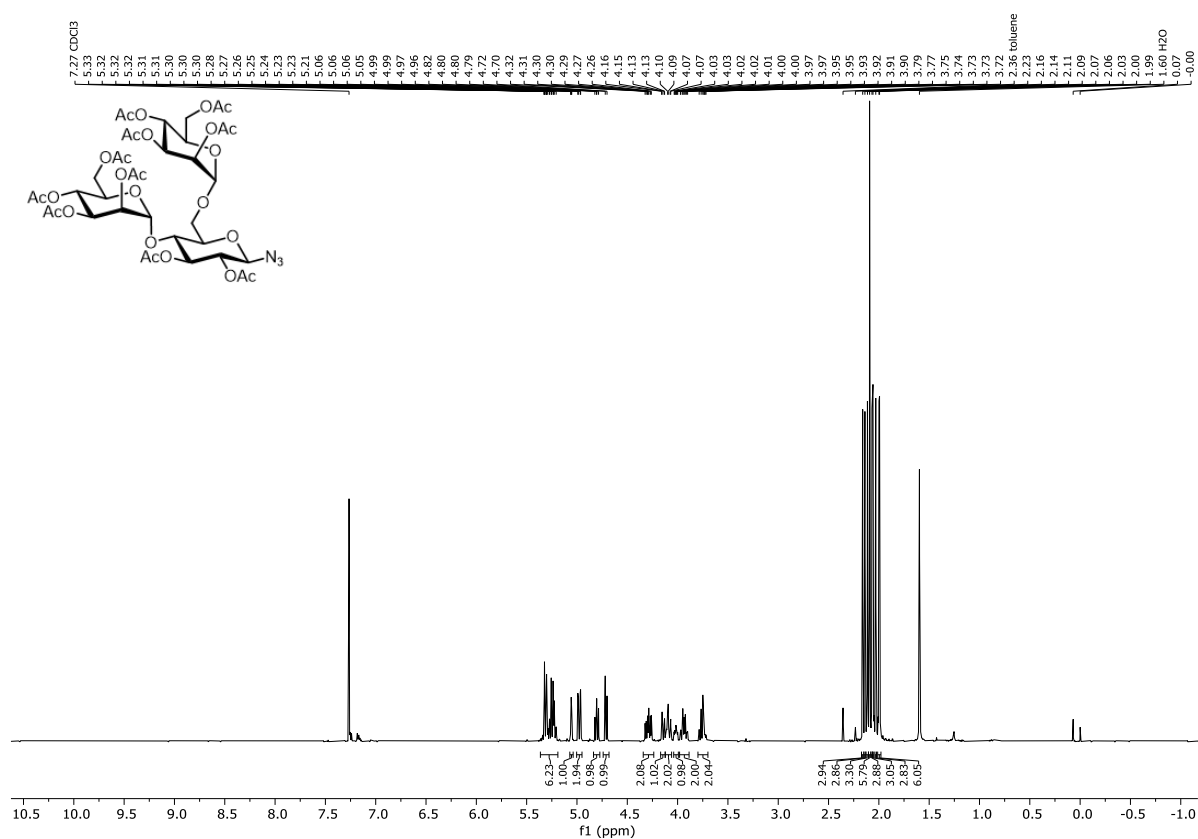

**Figure S56.** <sup>1</sup>H NMR spectrum of compound **24** (500 MHz, CDCl<sub>3</sub>, 298 K).

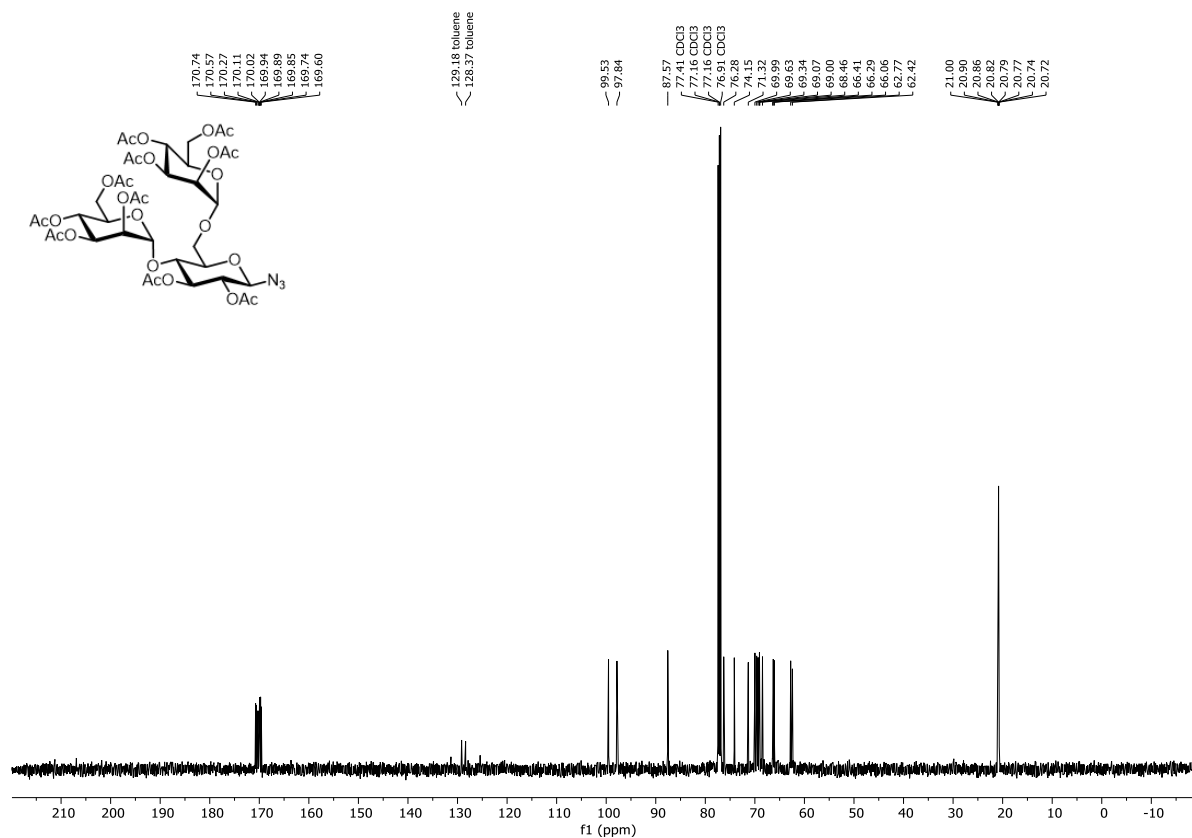

**Figure S57.** <sup>13</sup>C NMR spectrum of compound **24** (126 MHz, CDCl<sub>3</sub>, 298 K).

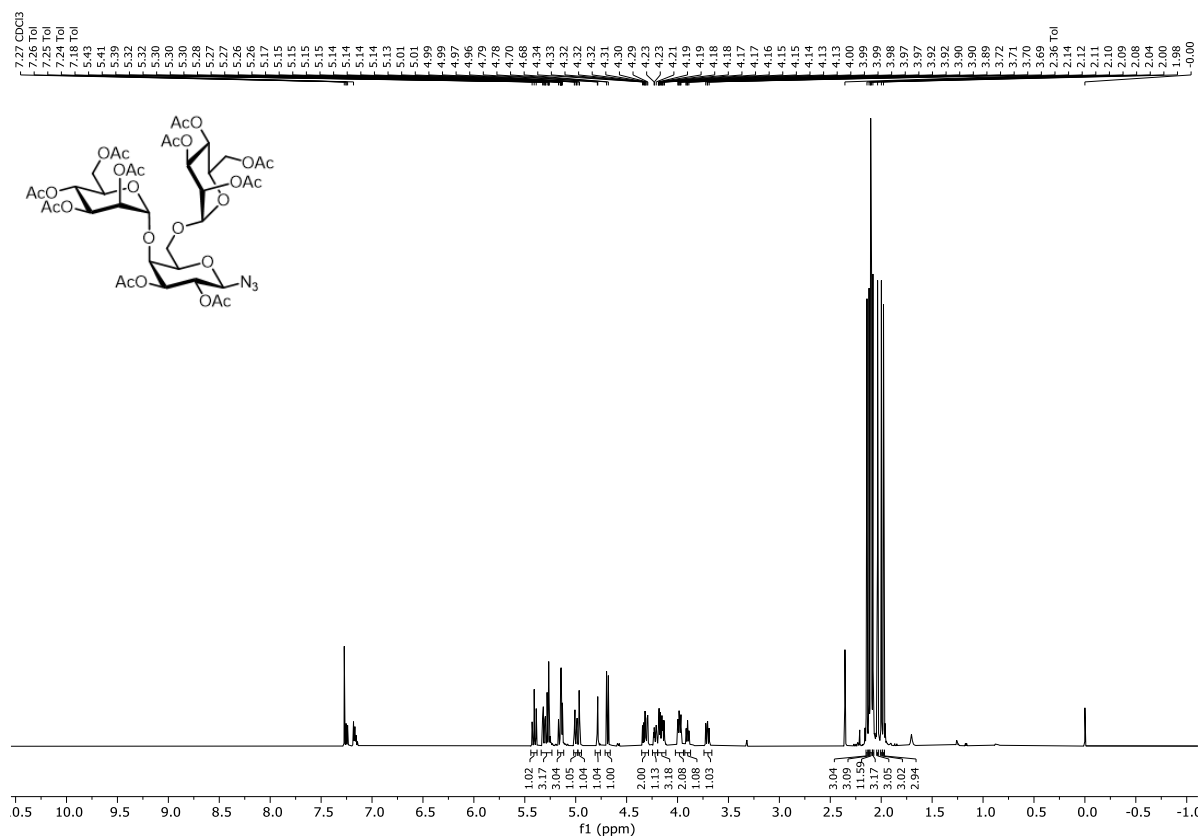

**Figure S58.** <sup>1</sup>H NMR spectrum of compound **25** (500 MHz, CDCl<sub>3</sub>, 298 K).

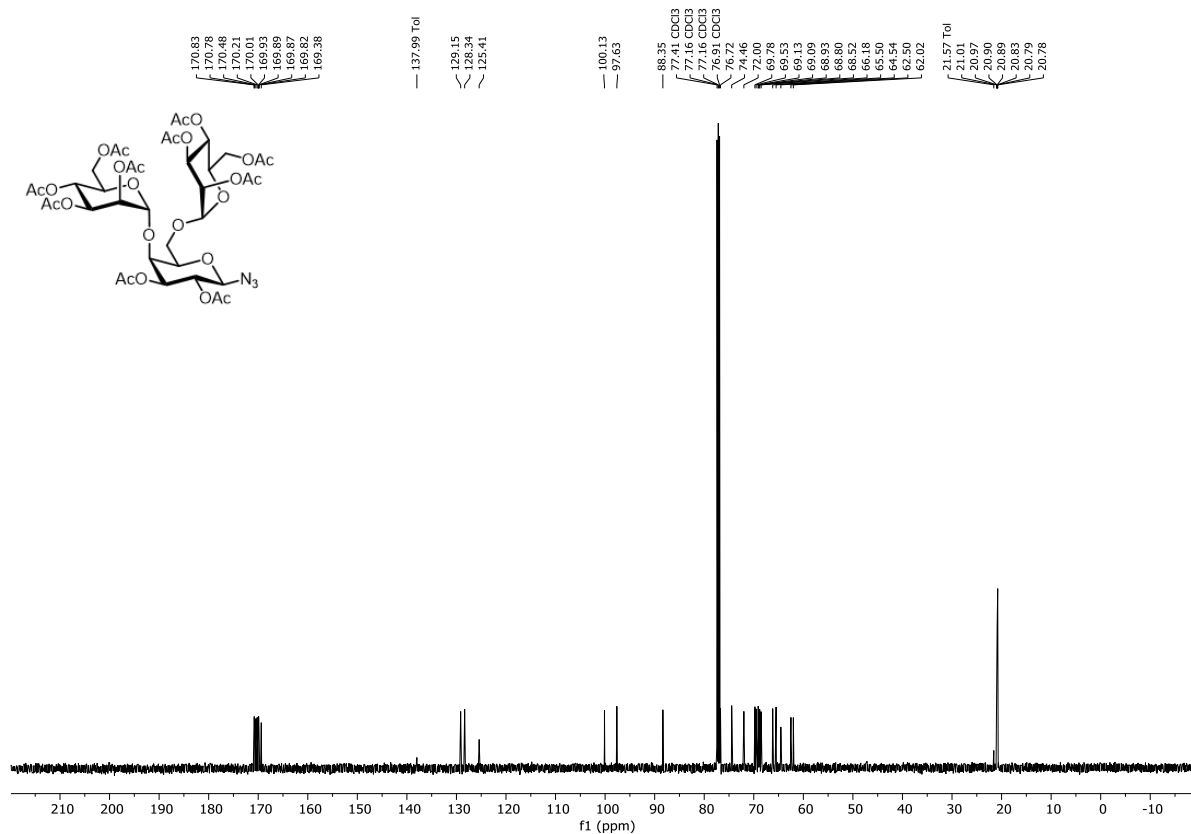

**Figure S59.** <sup>13</sup>C NMR spectrum of compound **25** (126 MHz, CDCl<sub>3</sub>, 298 K).

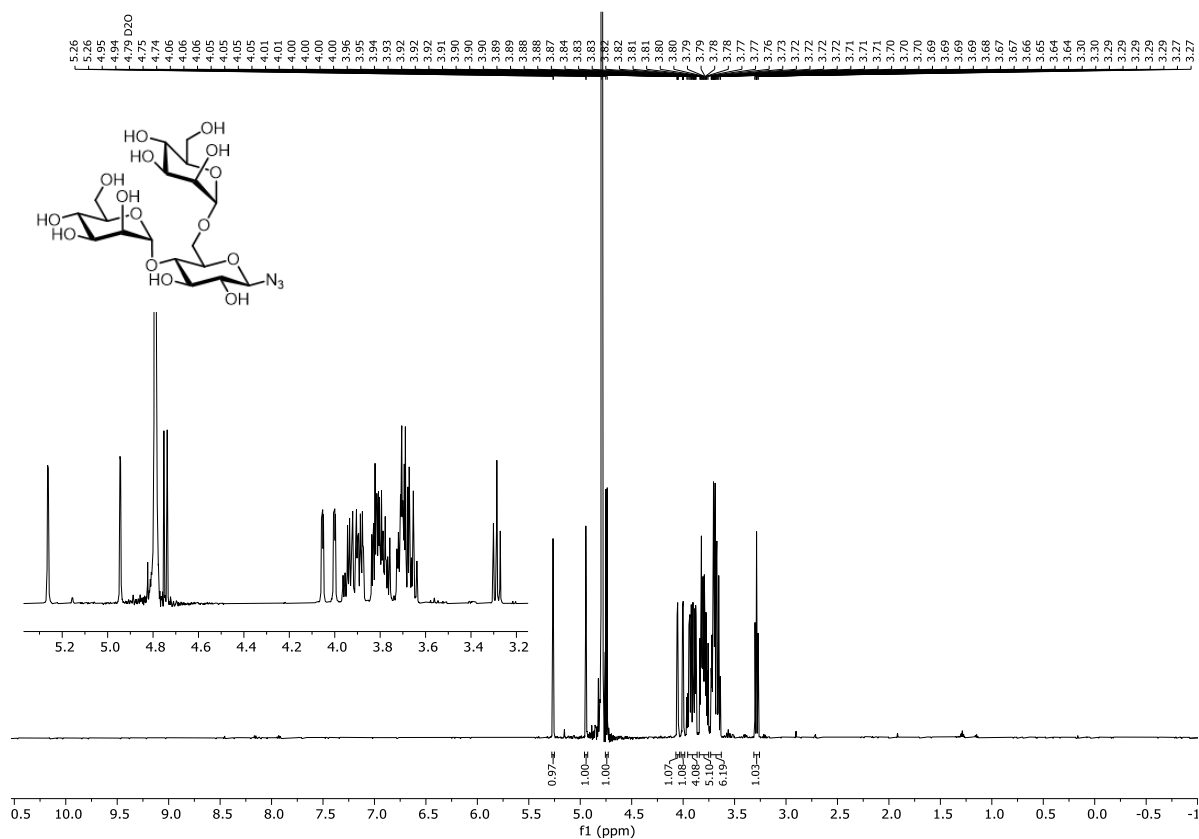

**Figure S60.** <sup>1</sup>H NMR spectrum of compound **26** (600 MHz, D<sub>2</sub>O, 298 K).

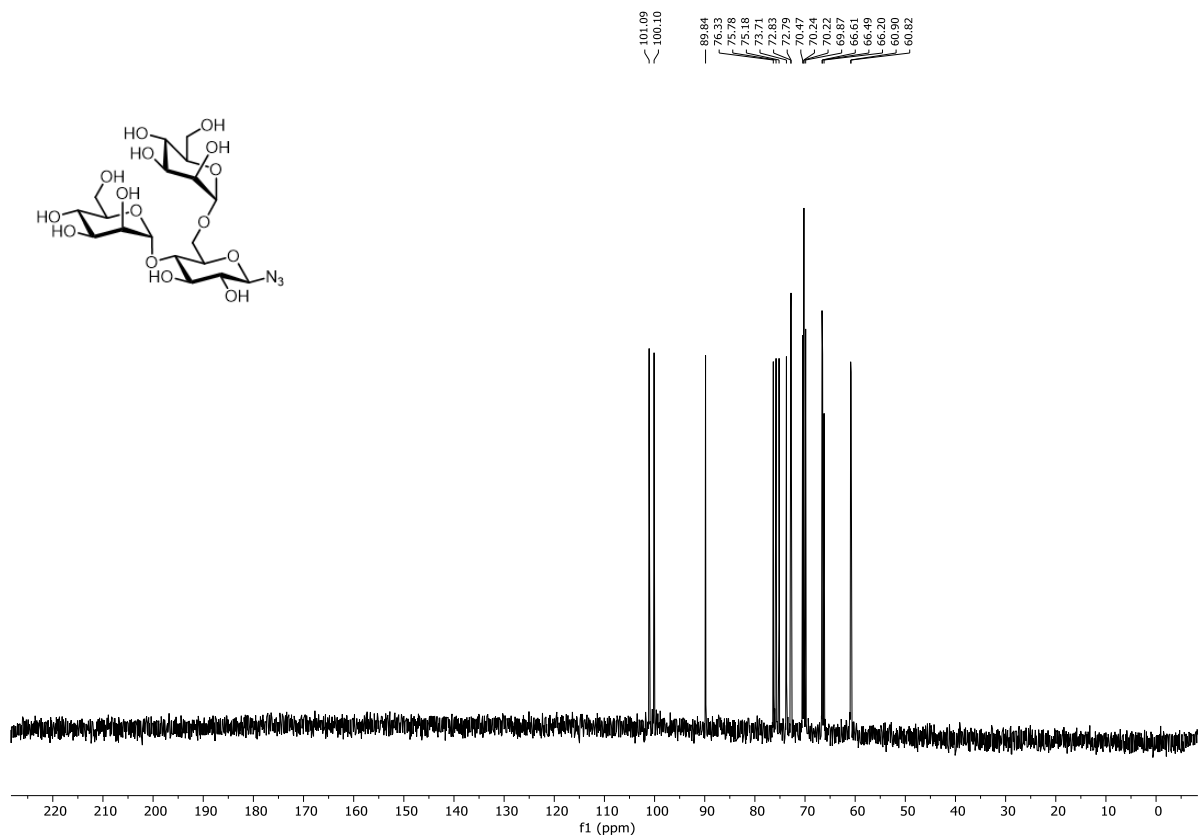

**Figure S61.** <sup>13</sup>C NMR spectrum of compound **26** (151 MHz, D<sub>2</sub>O, 298 K).



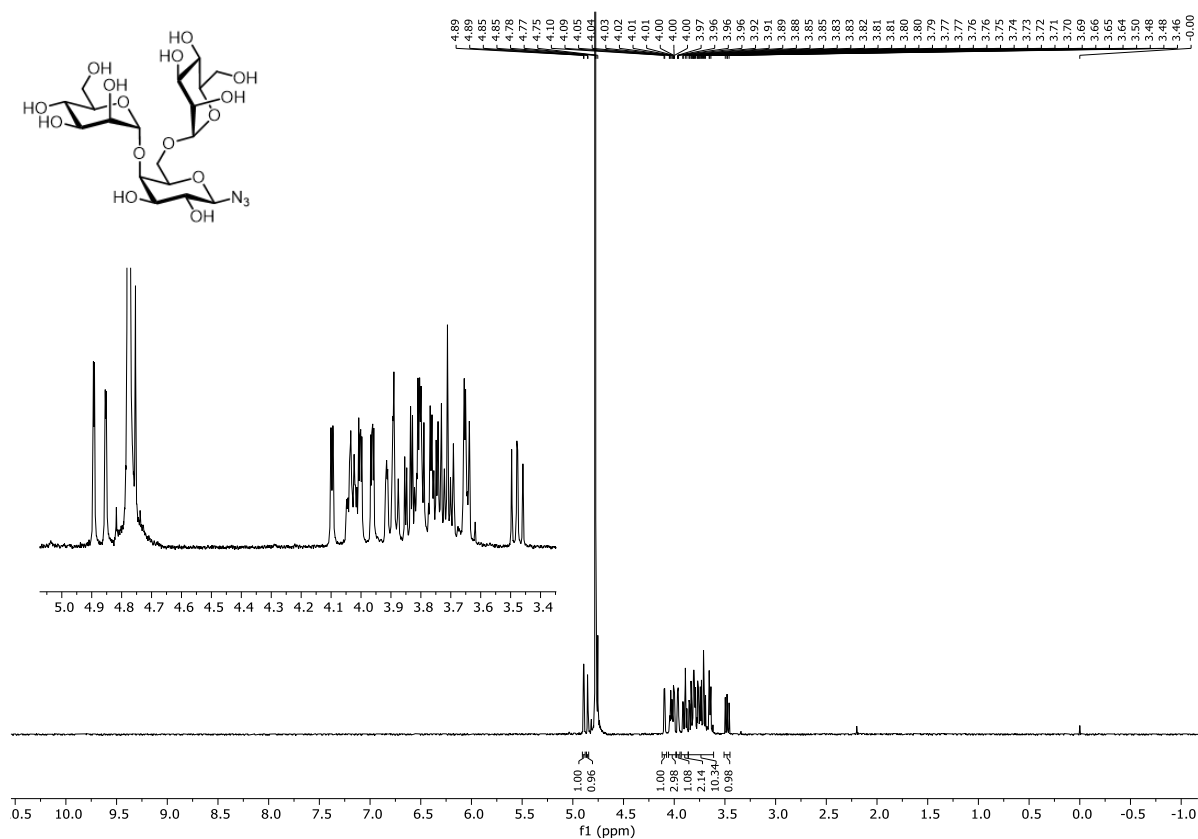

**Figure S62.**  $^1\text{H}$  NMR spectrum of compound **27** (500 MHz,  $\text{D}_2\text{O}$ , 298 K).

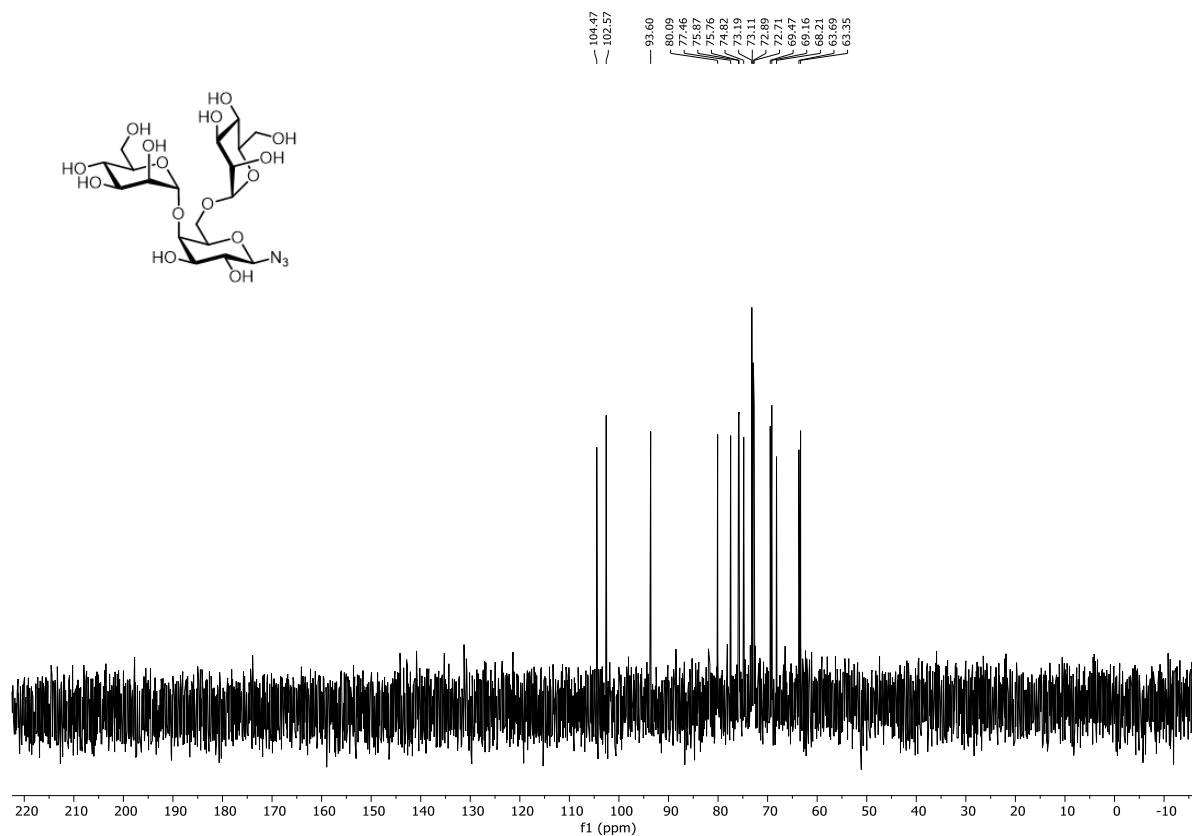

**Figure S63.**  $^{13}\text{C}$  NMR spectrum of compound **27** (126 MHz,  $\text{D}_2\text{O}$ , 298 K).

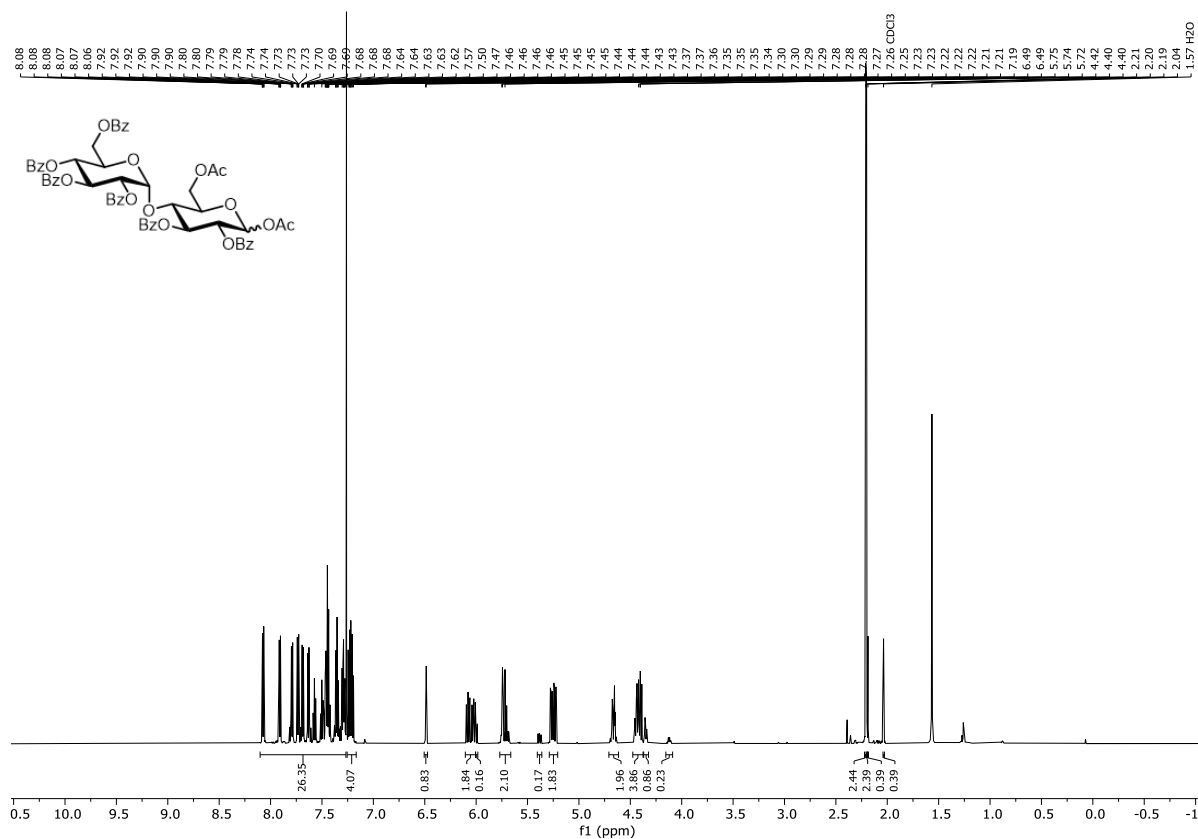

**Figure S64.**  $^1\text{H}$  NMR spectrum of compound **28** (600 MHz,  $\text{CDCl}_3$ , 298 K).

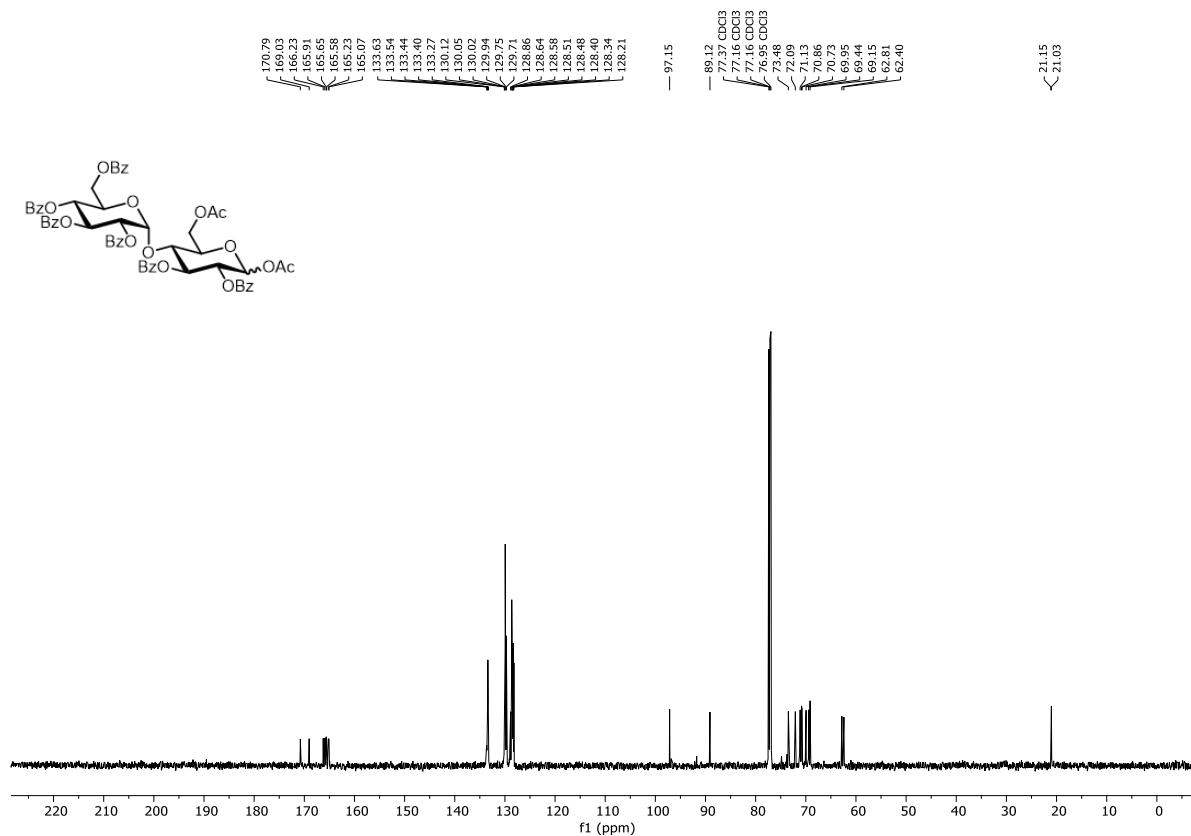

**Figure S65.**  $^{13}\text{C}$  NMR spectrum of compound **28** (151 MHz,  $\text{CDCl}_3$ , 298 K).

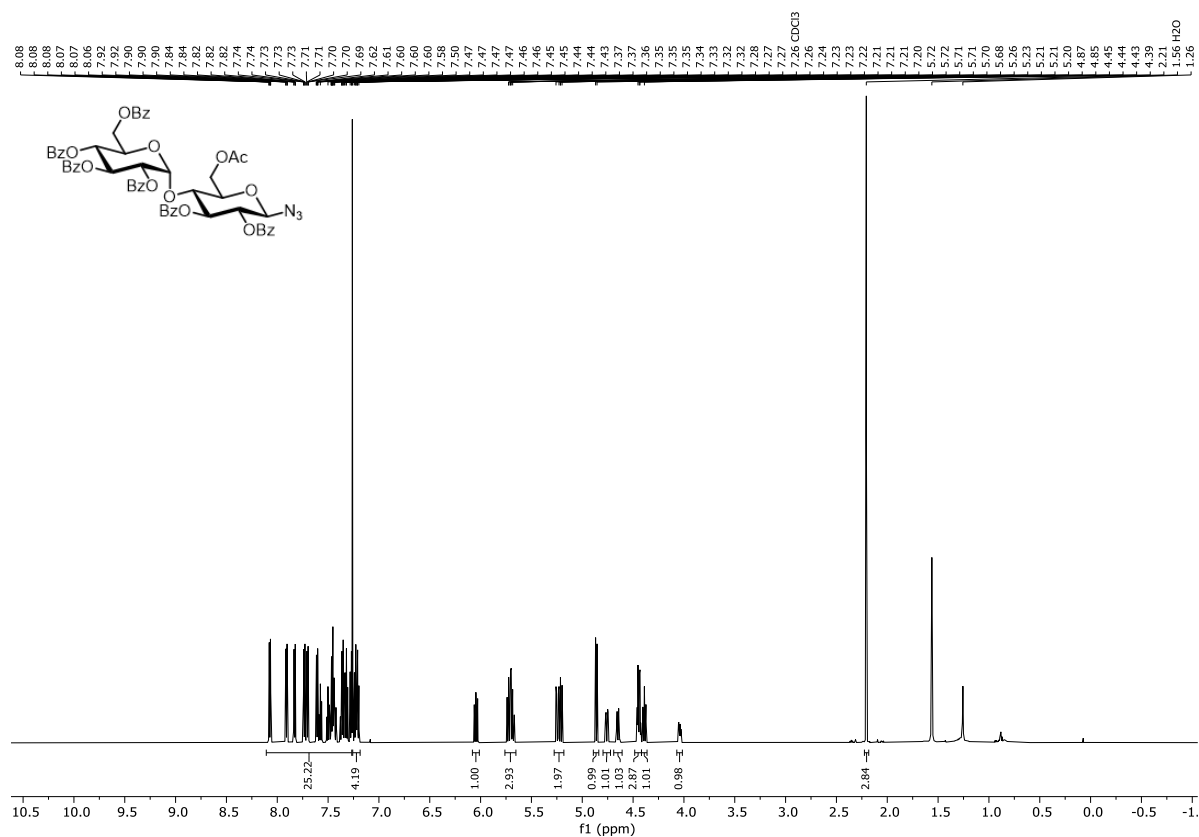

**Figure S66.** <sup>1</sup>H NMR spectrum of compound **29** (600 MHz, CDCl<sub>3</sub>, 298 K).

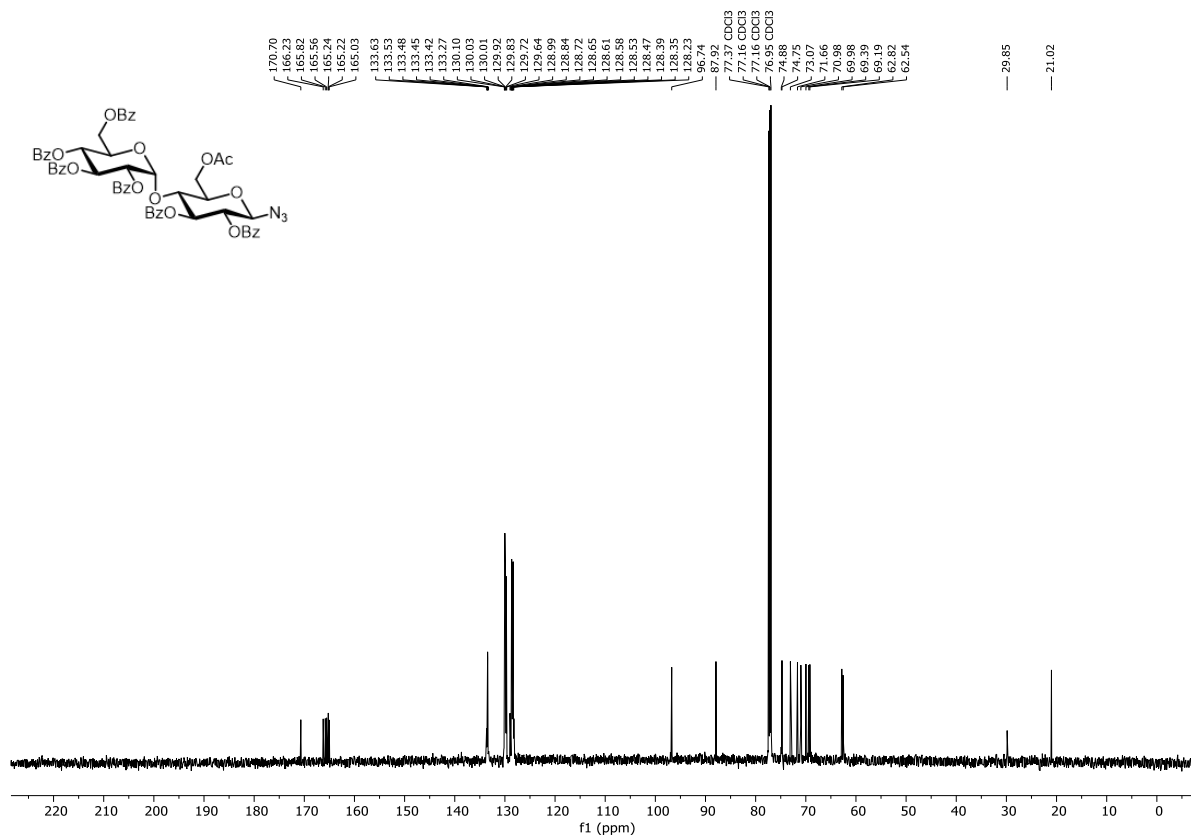

**Figure S67.** <sup>13</sup>C NMR spectrum of compound **29** (151 MHz, CDCl<sub>3</sub>, 298 K).

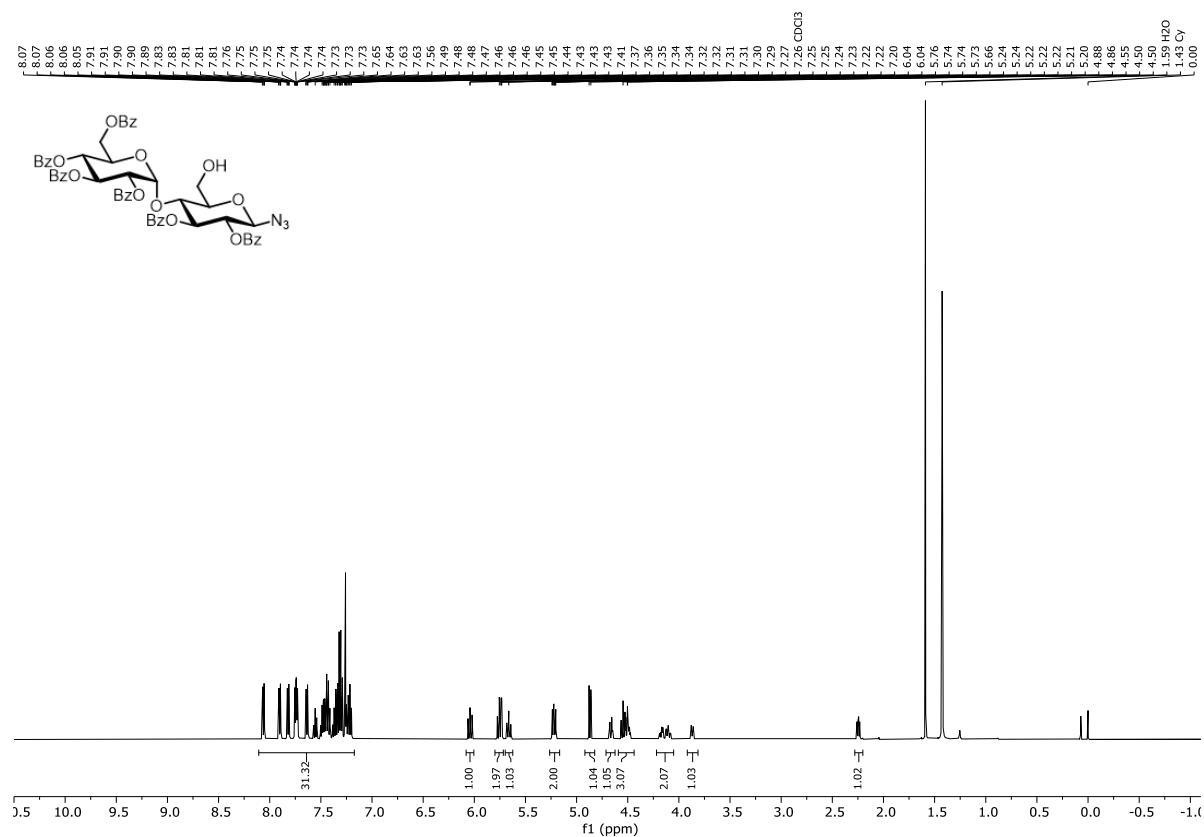

**Figure S68.** <sup>1</sup>H NMR spectrum of compound **30** (500 MHz, CDCl<sub>3</sub>, 298 K).

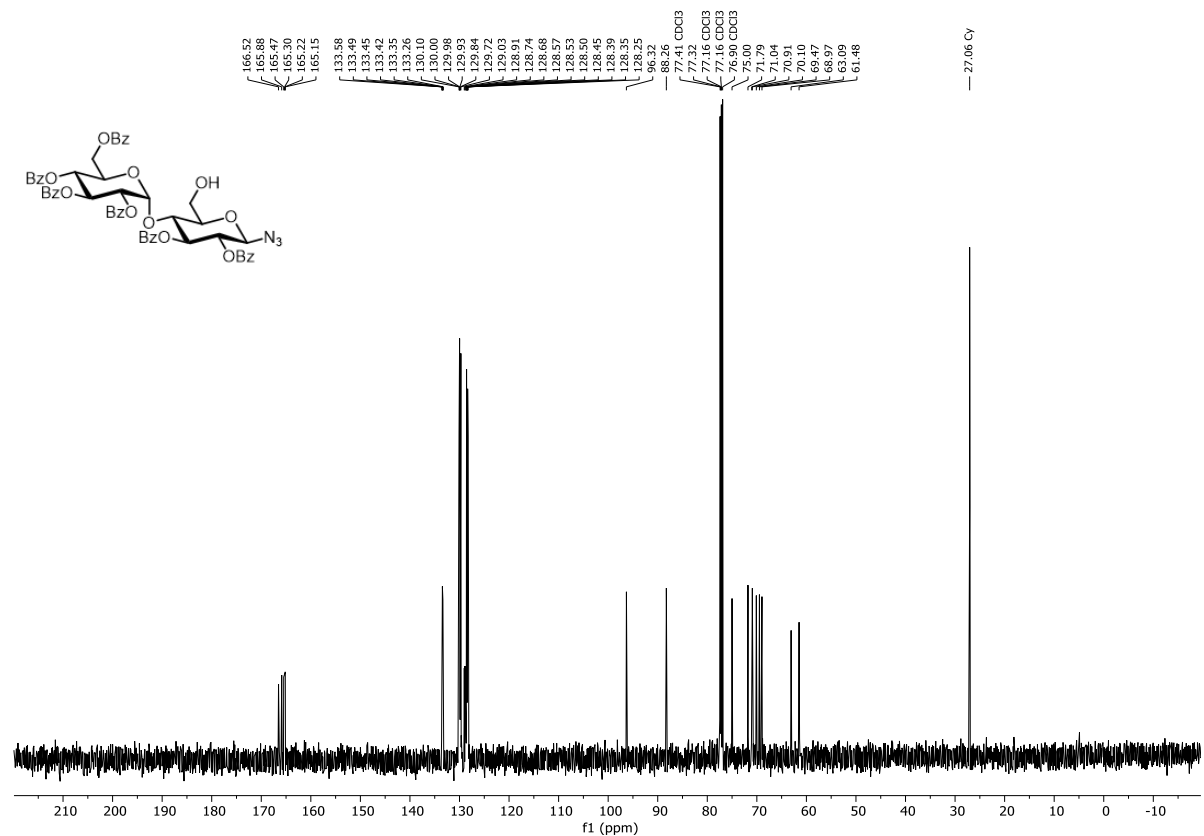

**Figure S69.** <sup>13</sup>C NMR spectrum of compound **30** (126 MHz, CDCl<sub>3</sub>, 298 K).

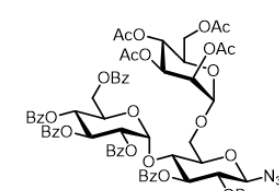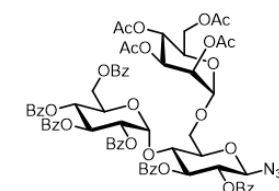

105

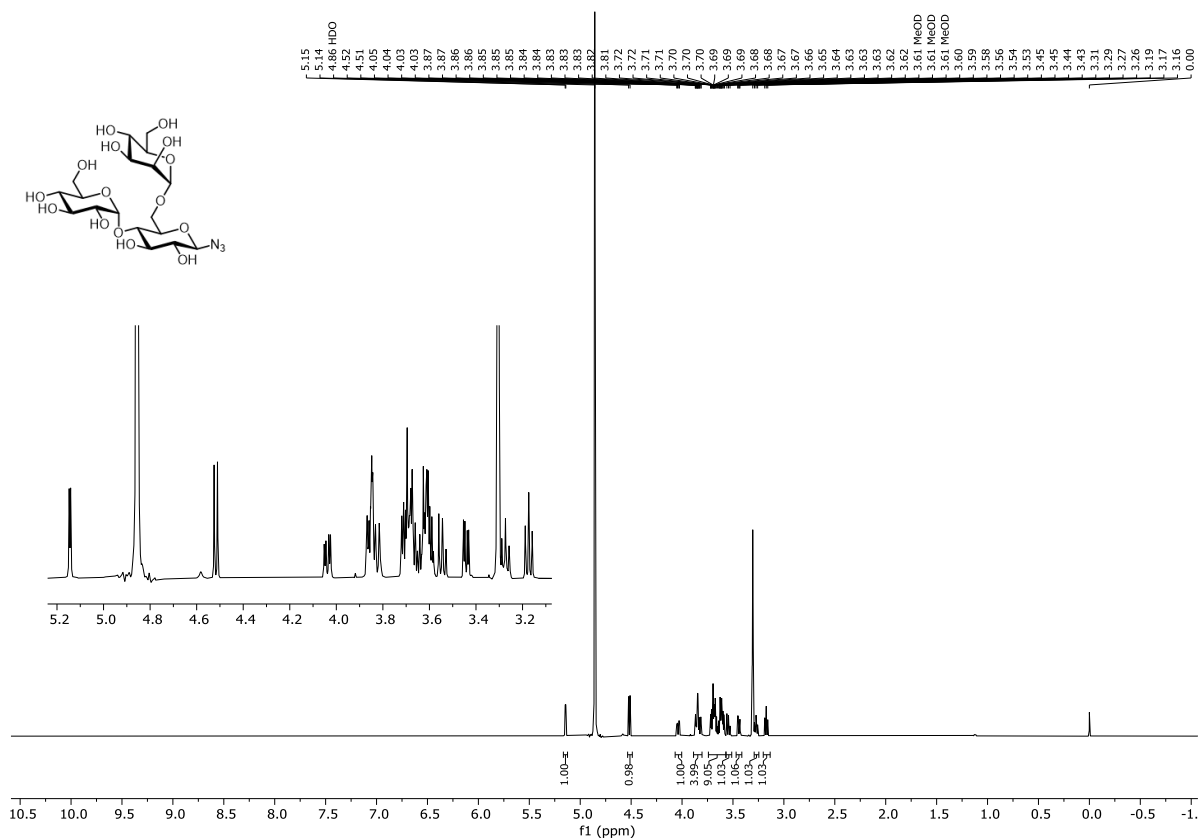

**Figure S72.** <sup>1</sup>H NMR spectrum of compound **32** (600 MHz, CD<sub>3</sub>OD, 298 K).

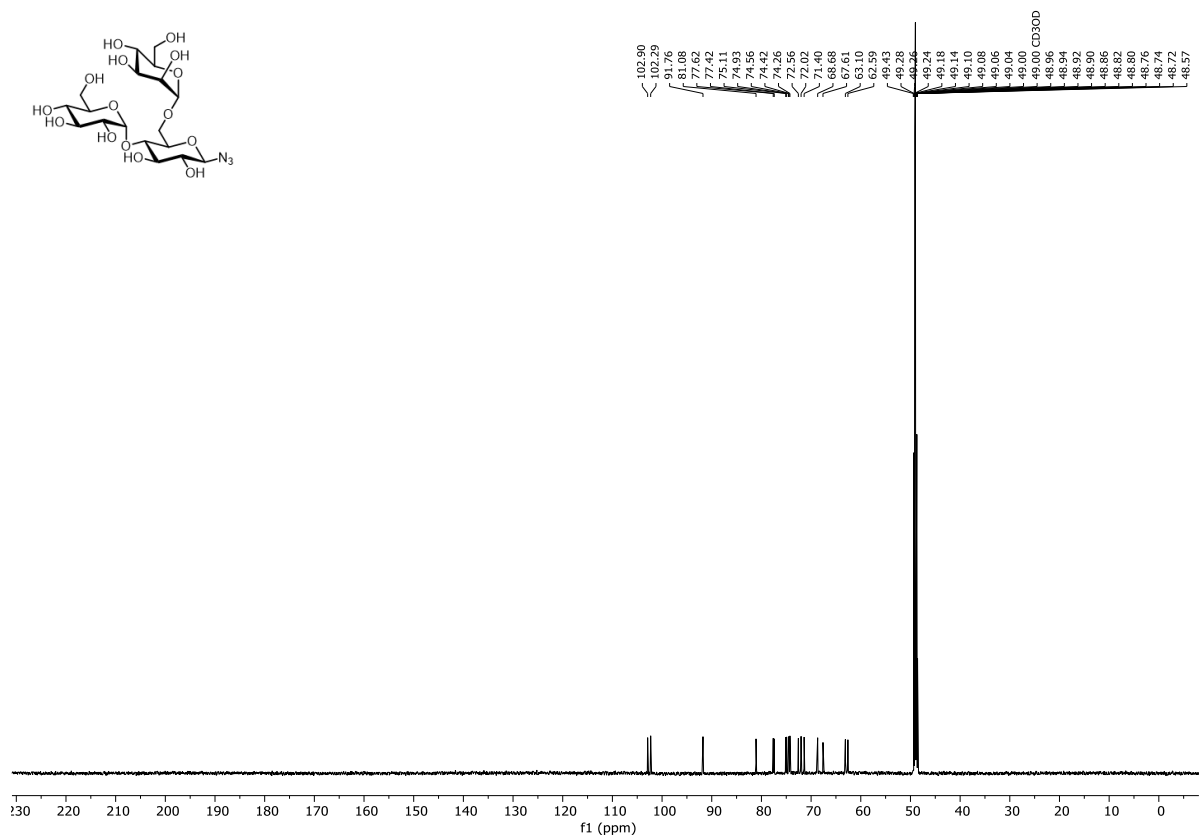

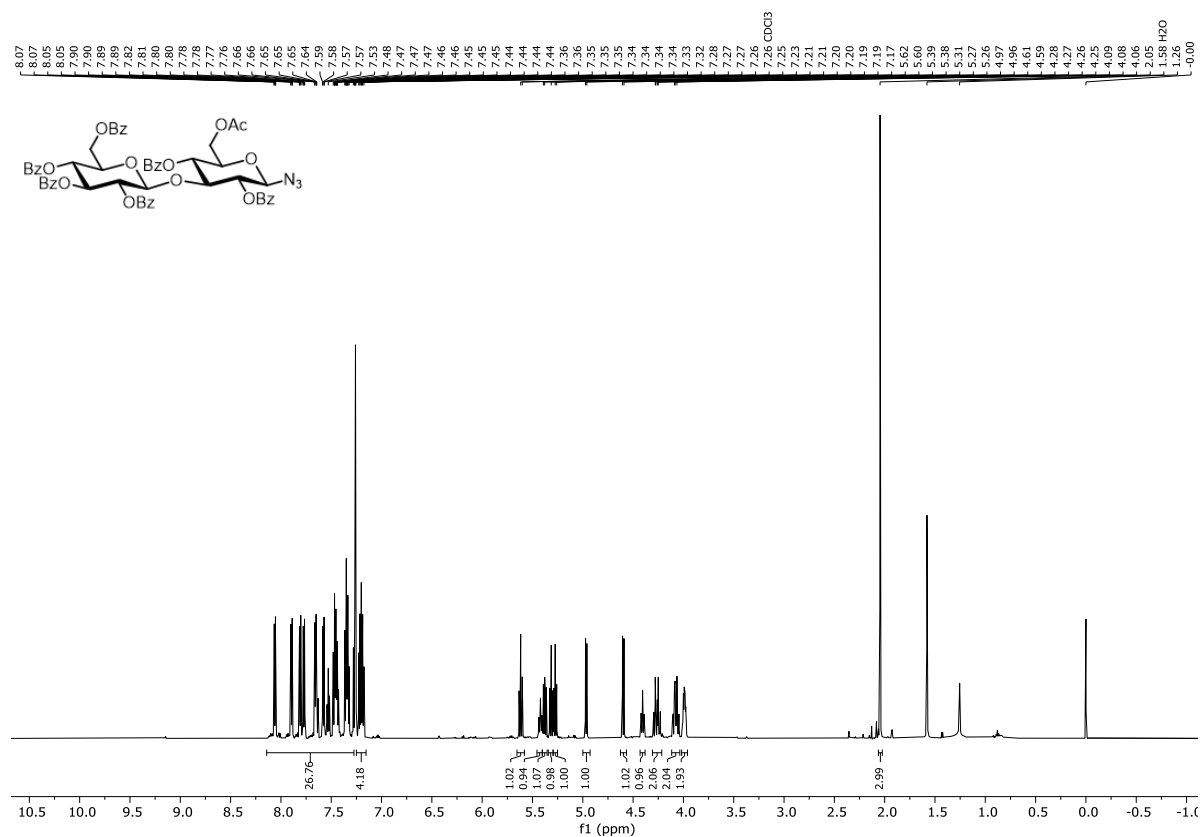

Figure S74. <sup>1</sup>H NMR spectrum of compound 34 (600 MHz, CDCl<sub>3</sub>, 298 K).

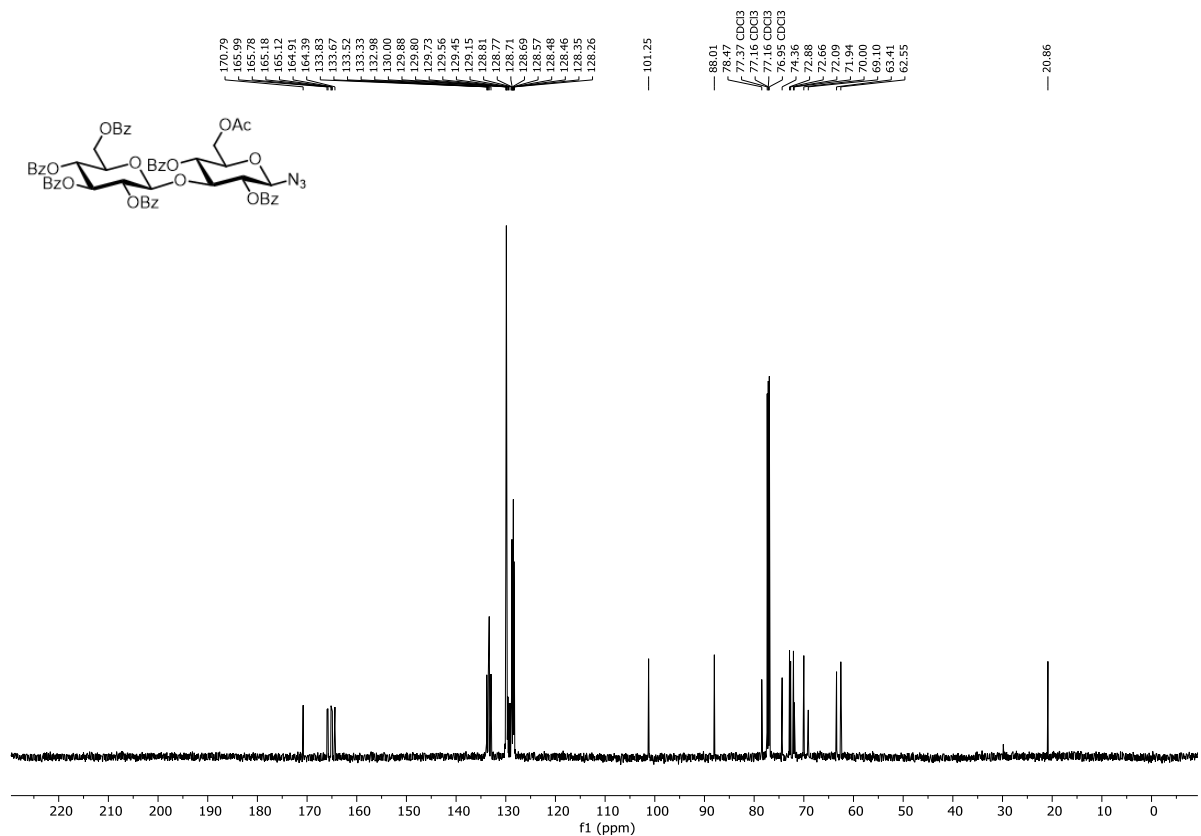

Figure S75. <sup>13</sup>C NMR spectrum of compound 34 (151 MHz, CDCl<sub>3</sub>, 298 K).

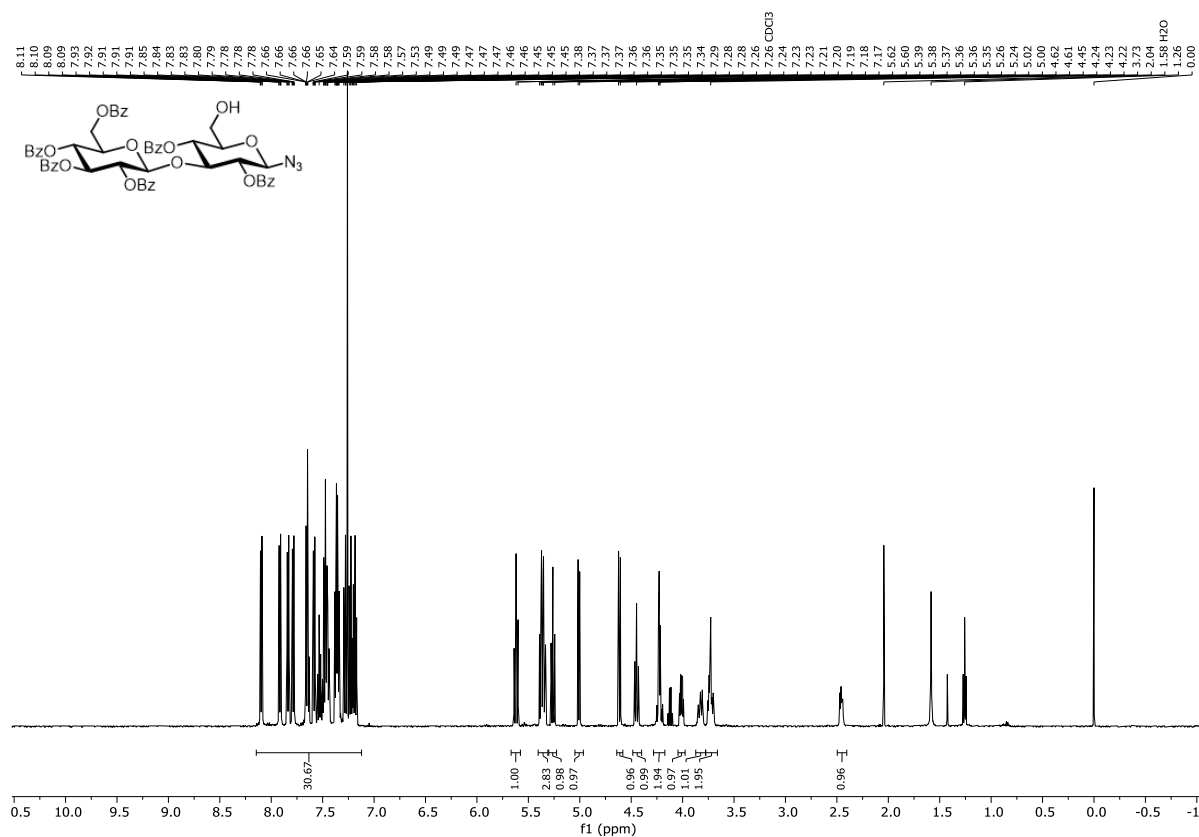

Figure S76. <sup>1</sup>H NMR spectrum of compound 35 (500 MHz, CDCl<sub>3</sub>, 298 K).

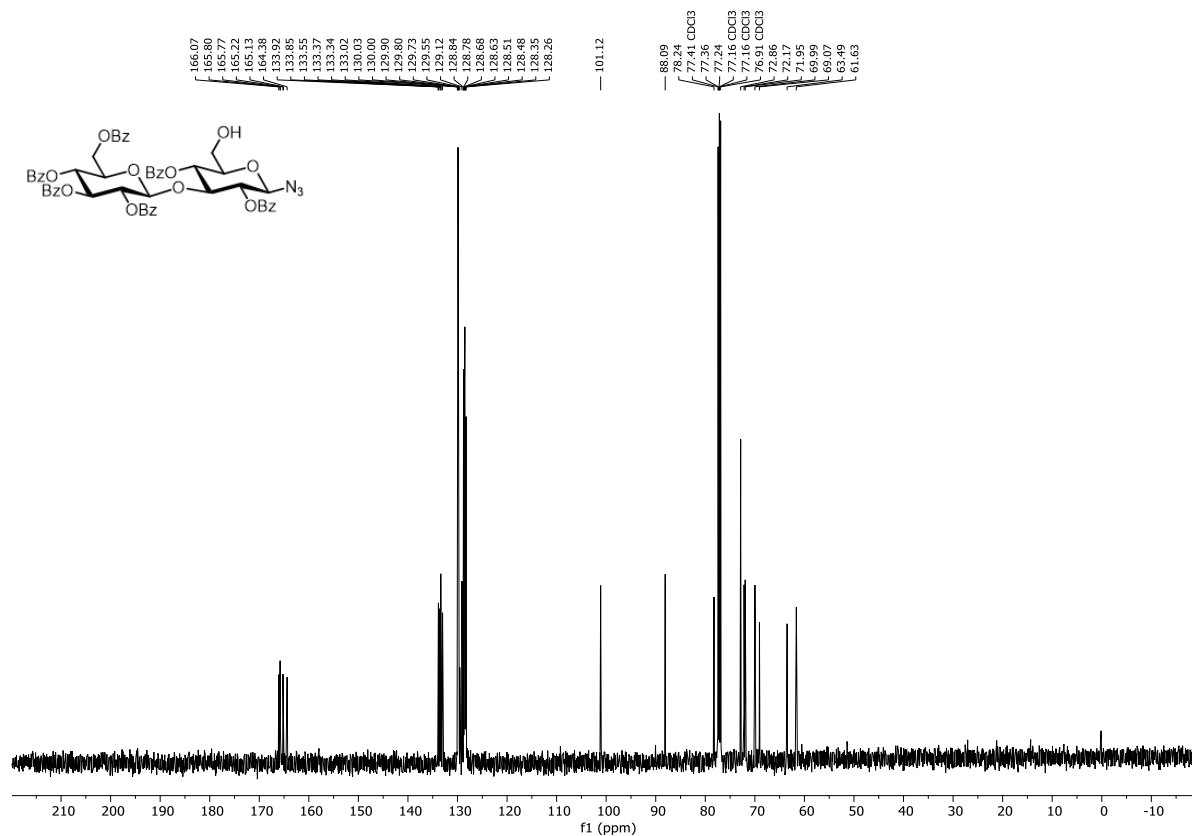

Figure S77. <sup>13</sup>C NMR spectrum of compound 35 (126 MHz, CDCl<sub>3</sub>, 298 K).



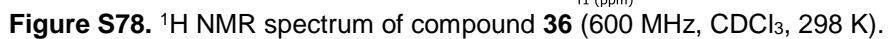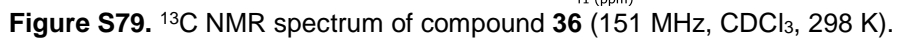

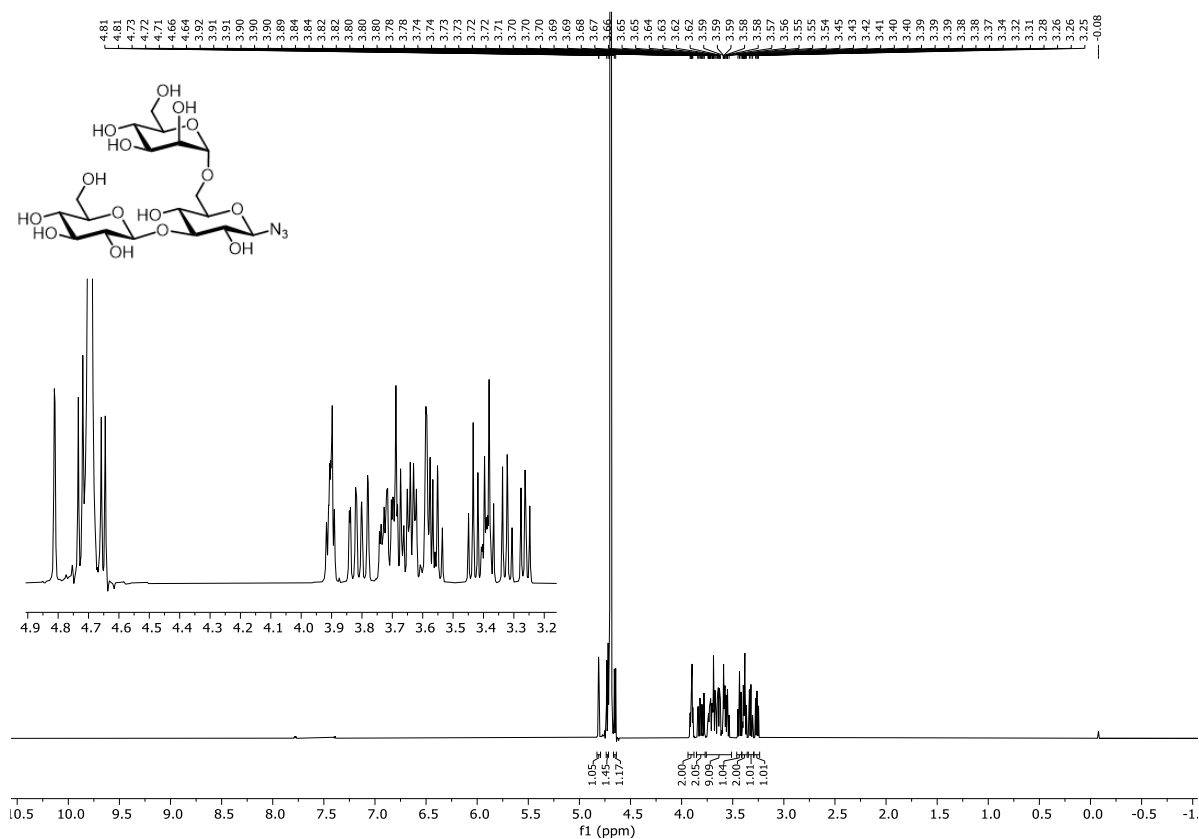

**Figure S80.** <sup>1</sup>H NMR spectrum of compound **37** (600 MHz, D<sub>2</sub>O, 298 K).

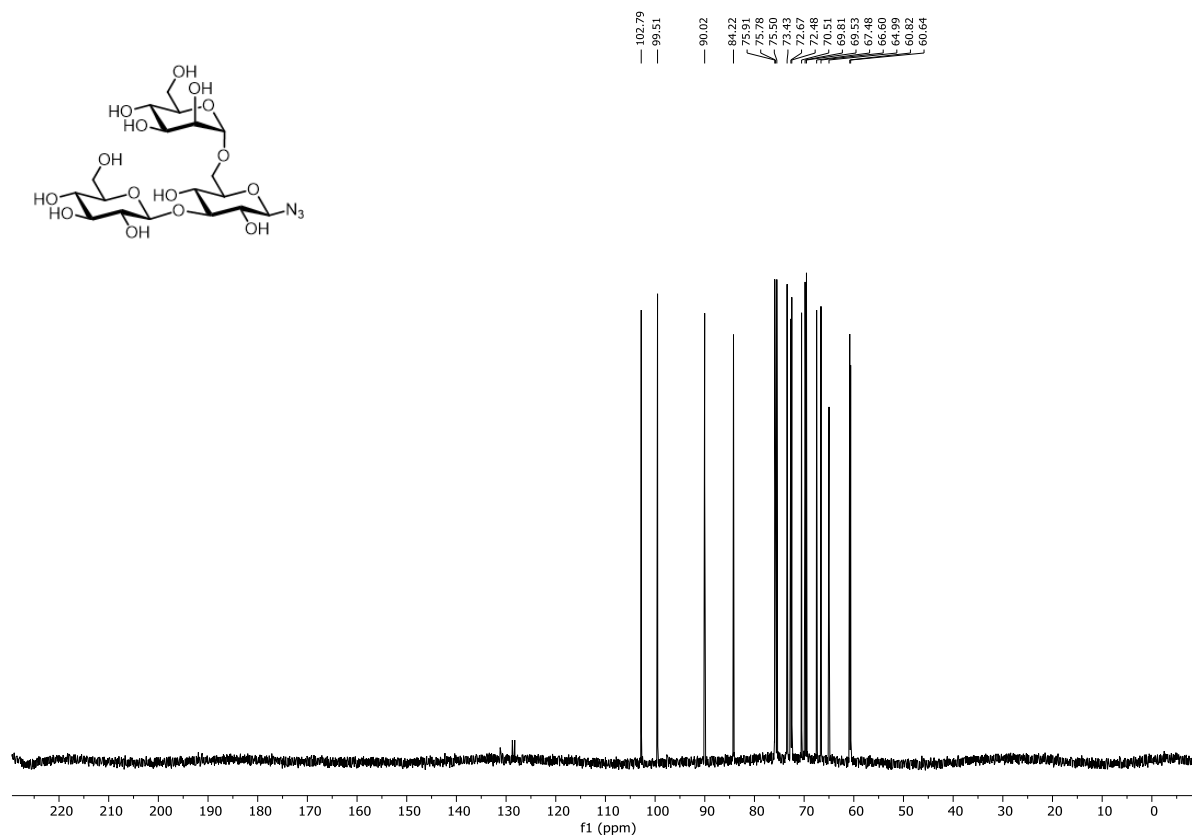

**Figure S81.** <sup>13</sup>C NMR spectrum of compound **37** (151 MHz, D<sub>2</sub>O, 298 K).

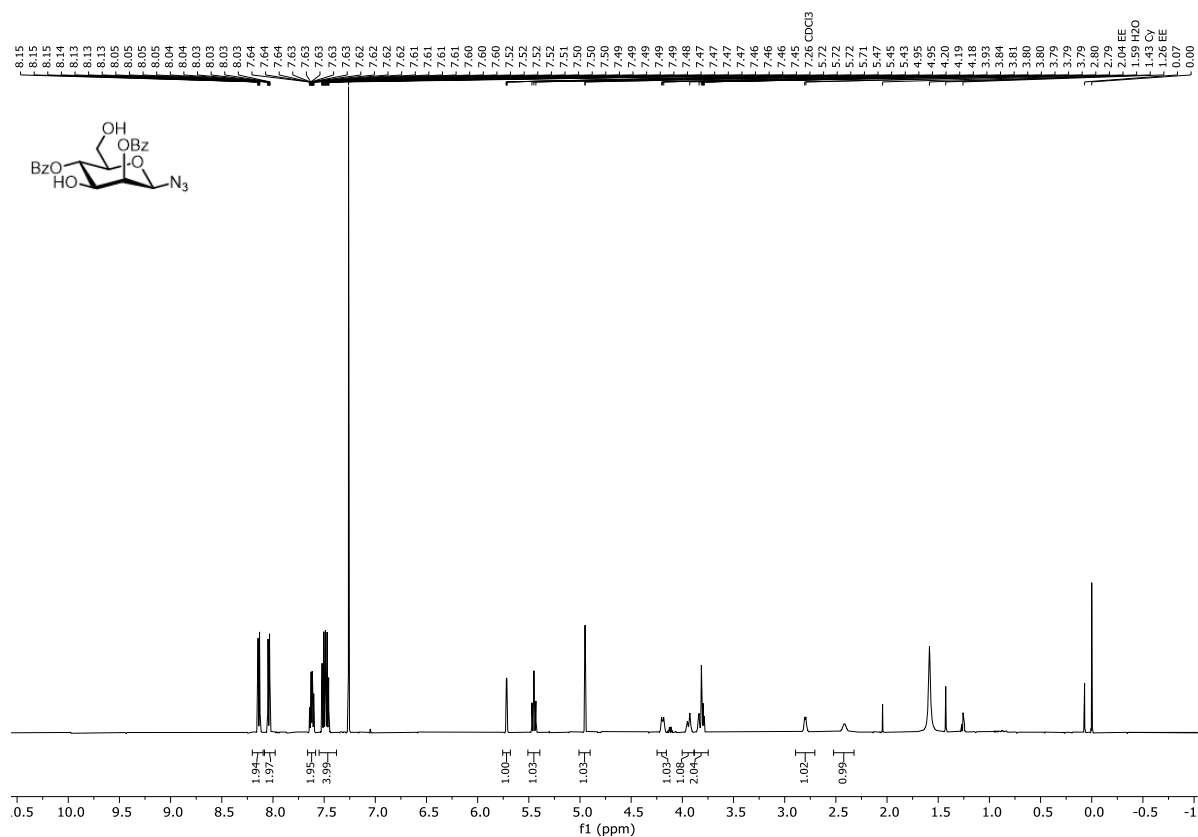

**Figure S82.** <sup>1</sup>H NMR spectrum of compound **39** (500 MHz, CDCl<sub>3</sub>, 298 K).

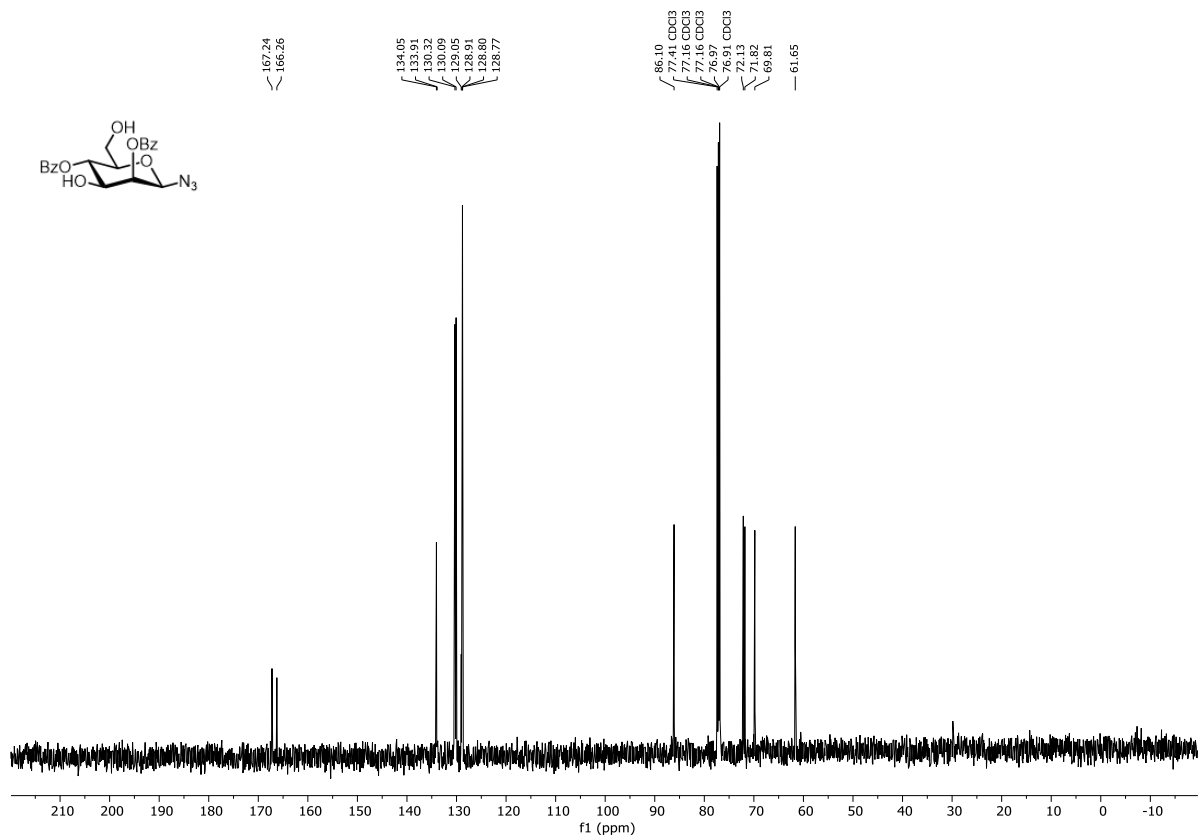

**Figure S83.** <sup>13</sup>C NMR spectrum of compound **39** (126 MHz, CDCl<sub>3</sub>, 298 K).

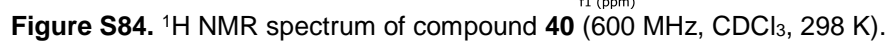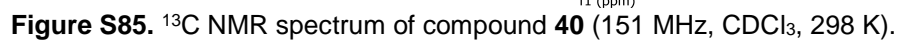

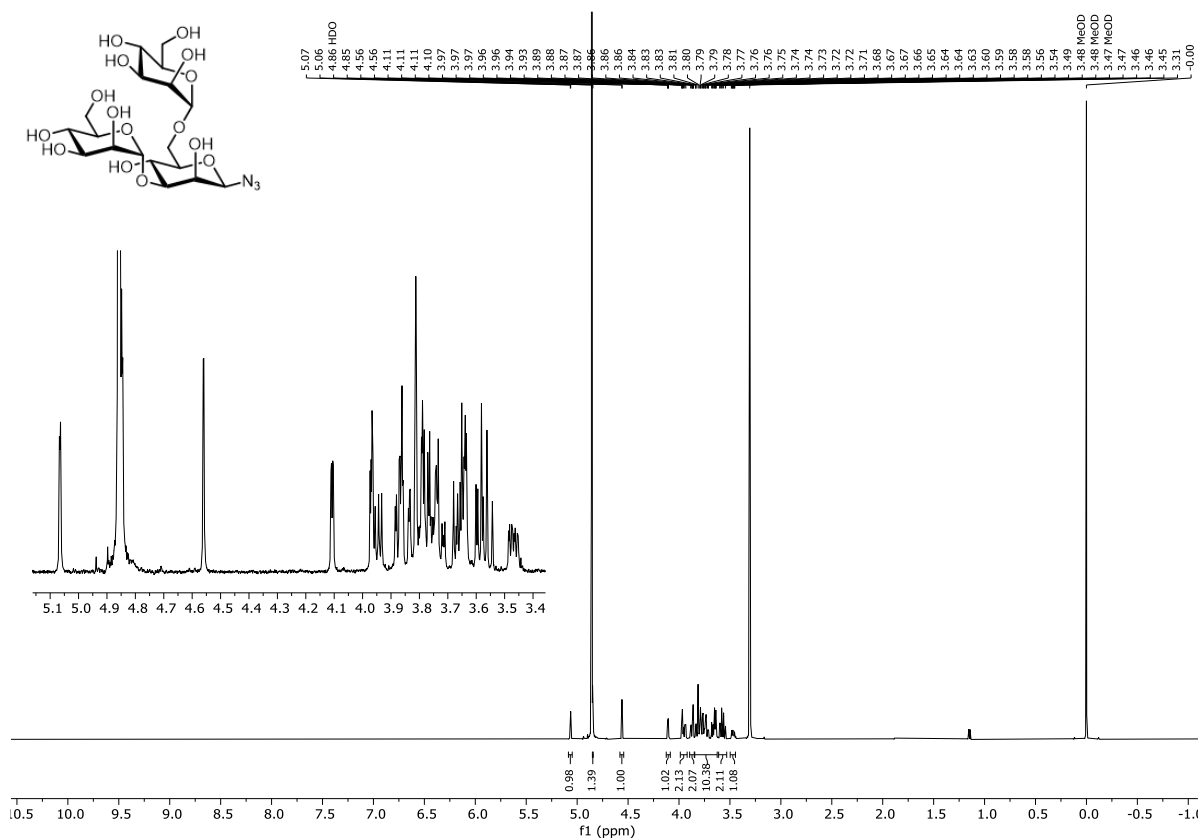

**Figure S86.** <sup>1</sup>H NMR spectrum of compound **41** (500 MHz, CD<sub>3</sub>OD, 298 K).

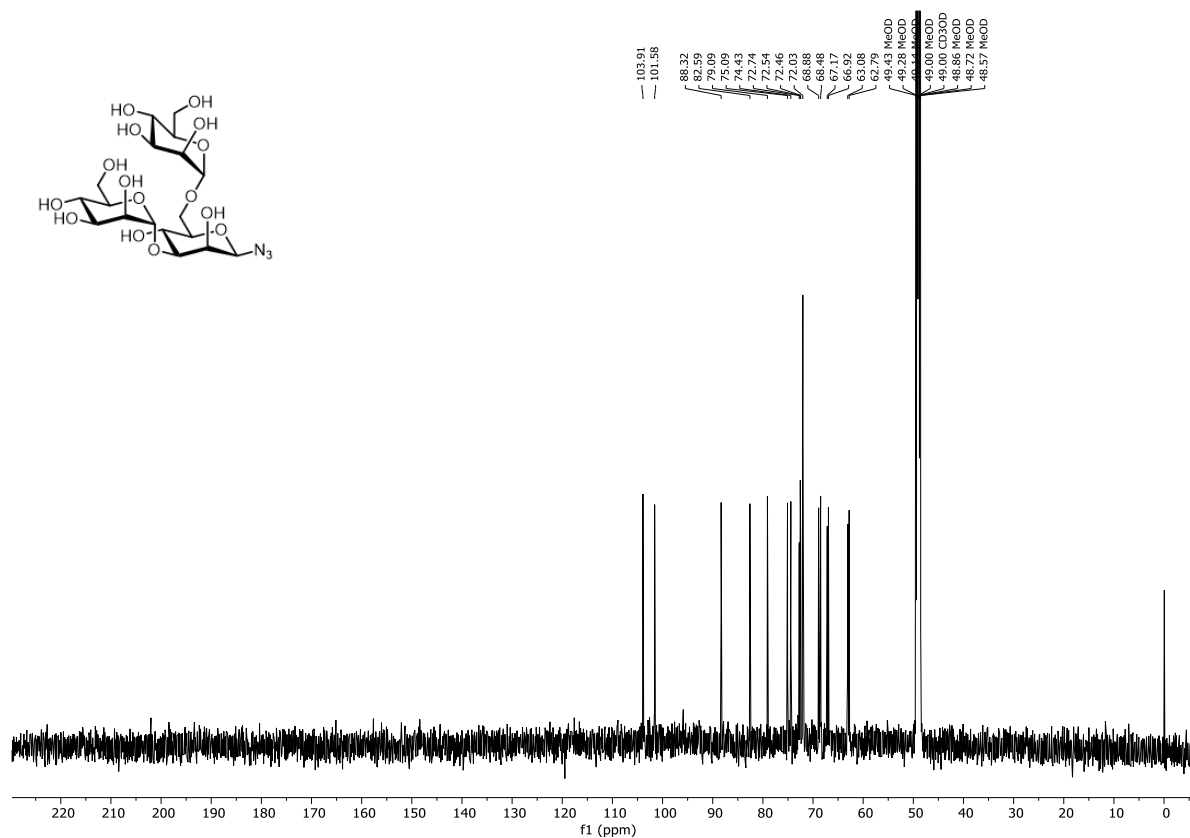

**Figure S87.** <sup>13</sup>C NMR spectrum of compound **41** (151 MHz, CD<sub>3</sub>OD, 298 K).



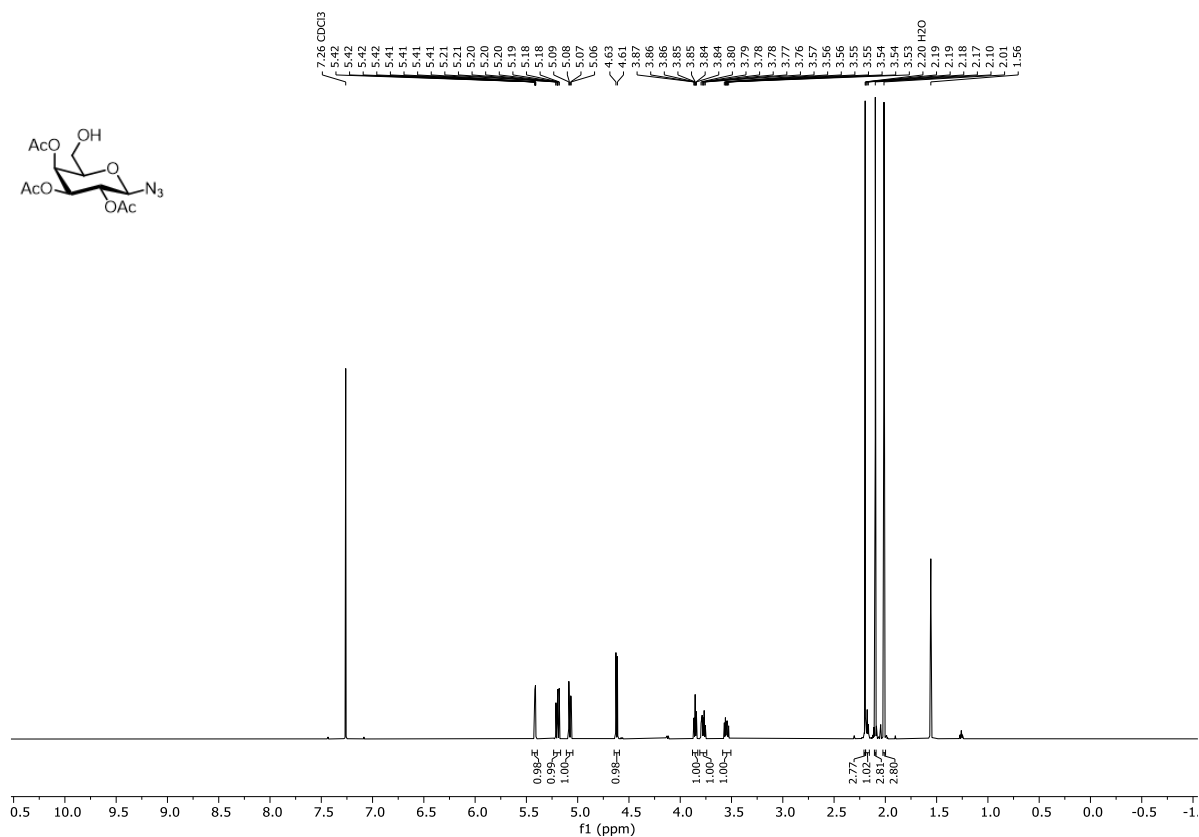

**Figure S90.** <sup>1</sup>H NMR spectrum of compound **43** (600 MHz, CDCl<sub>3</sub>, 298 K).

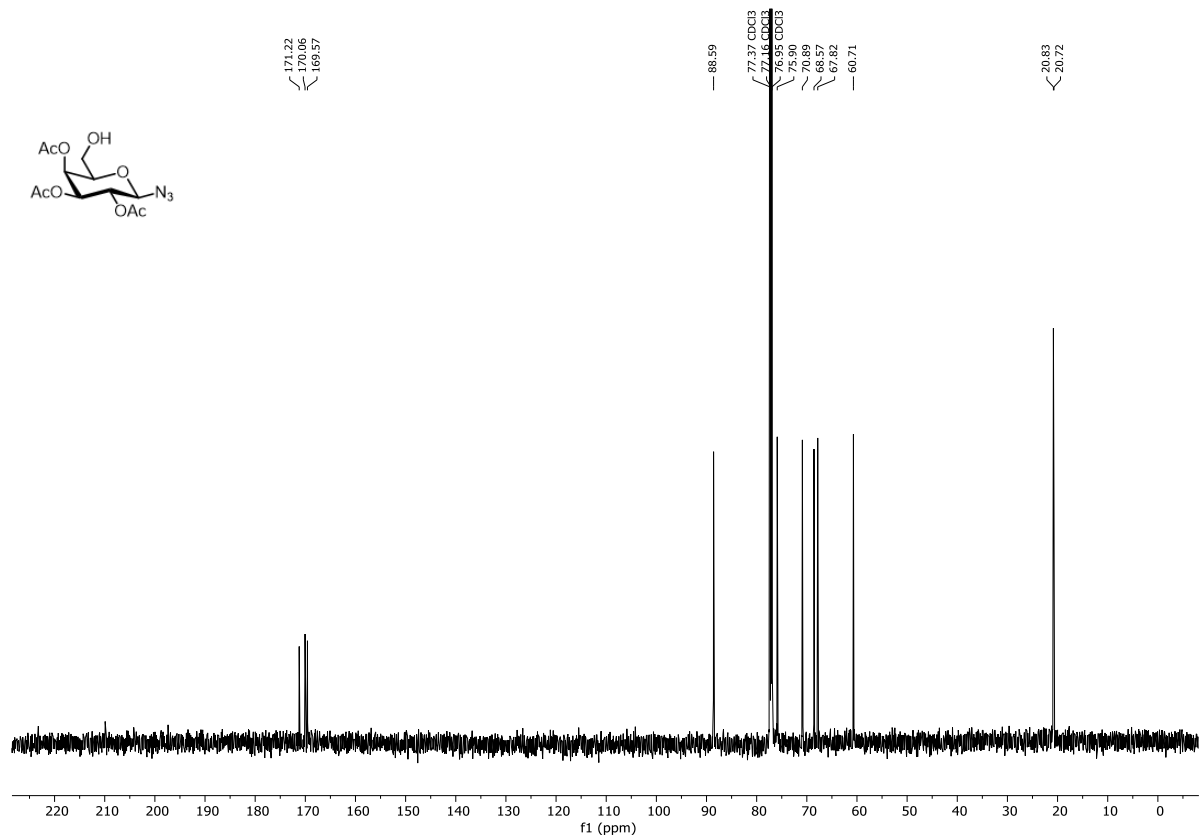

**Figure S91.** <sup>13</sup>C NMR spectrum of compound **43** (151 MHz, CDCl<sub>3</sub>, 298 K).

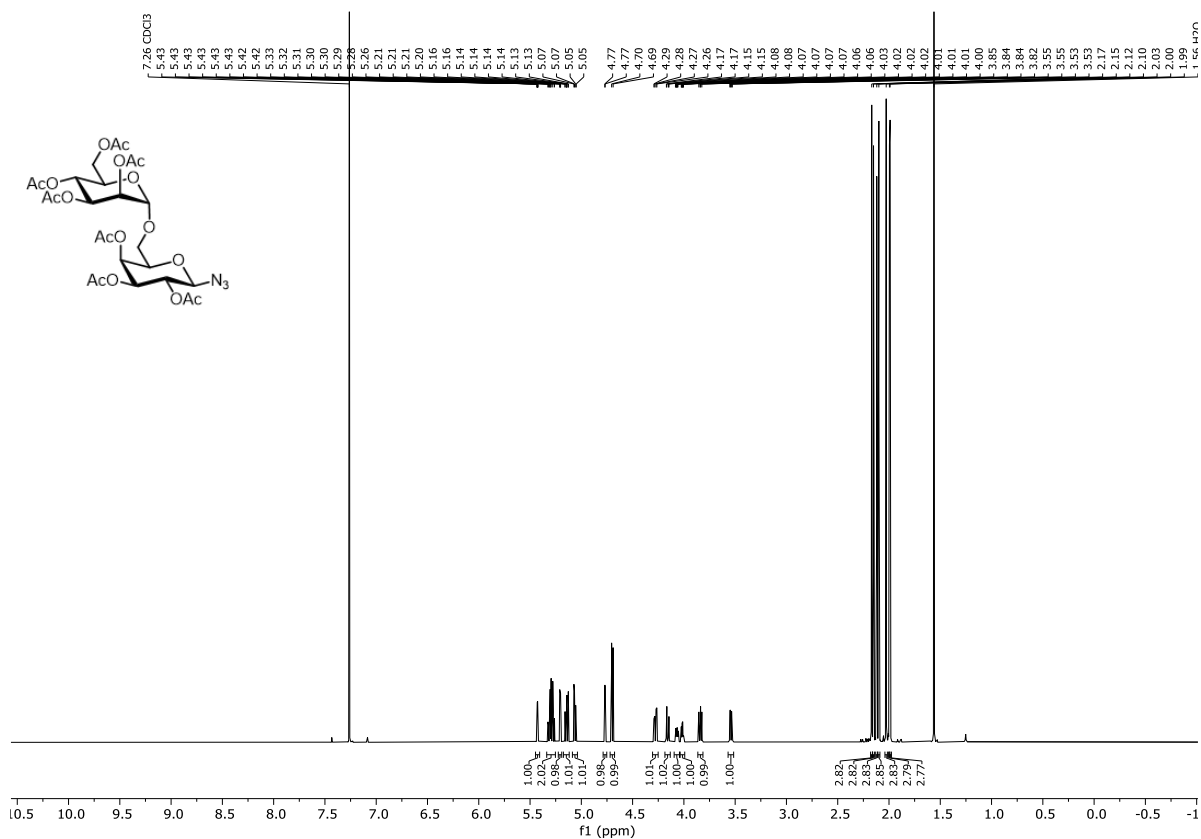



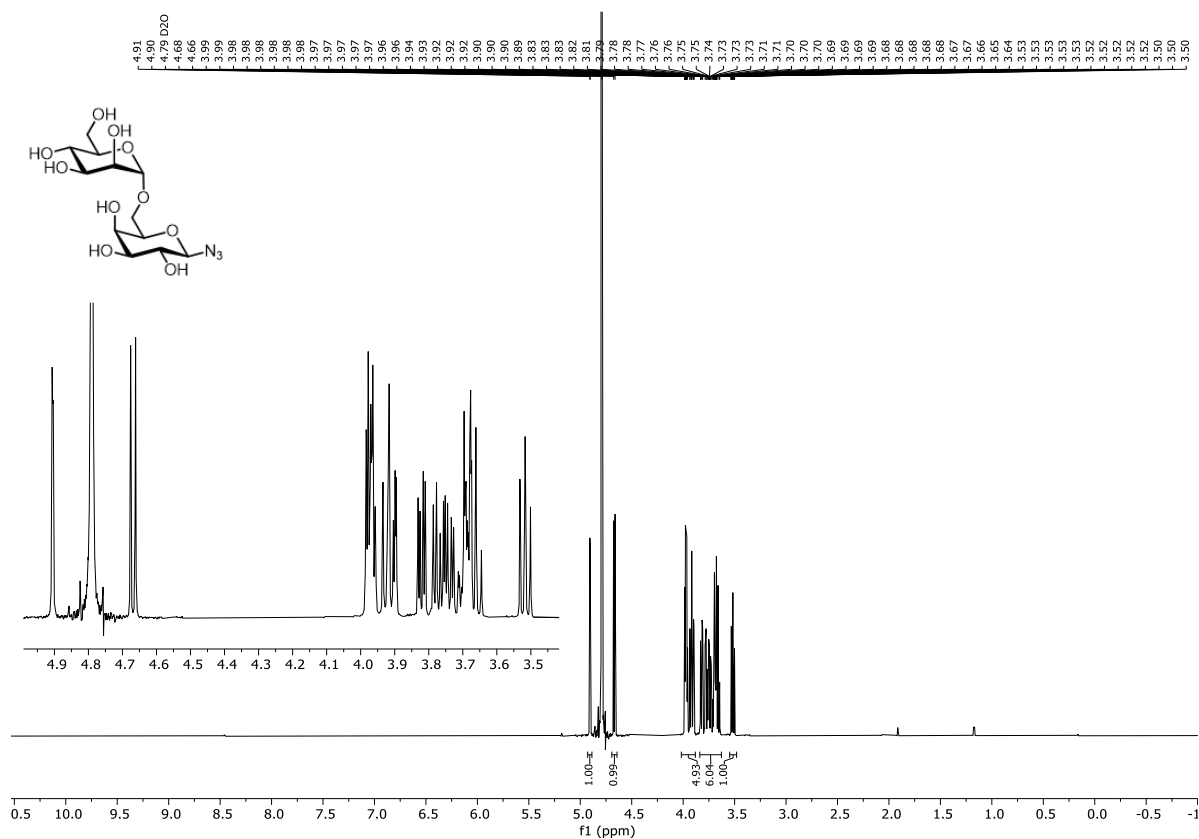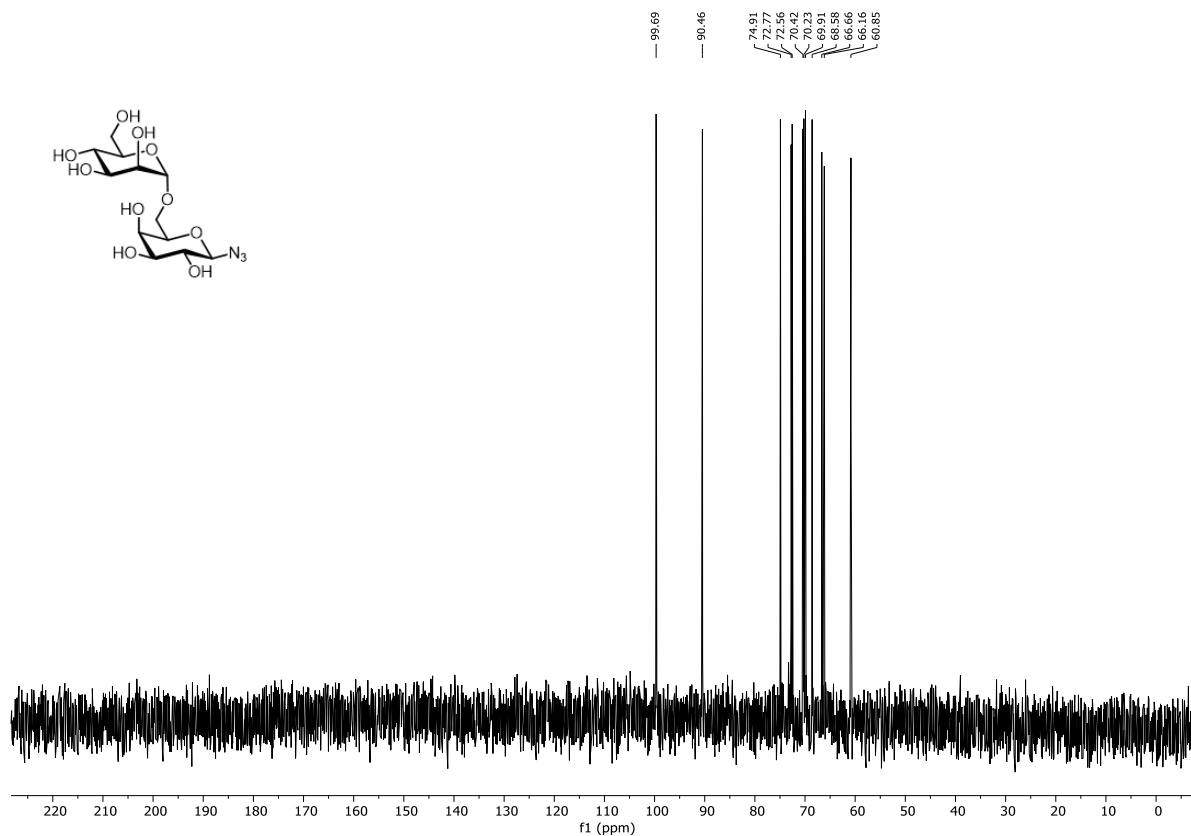

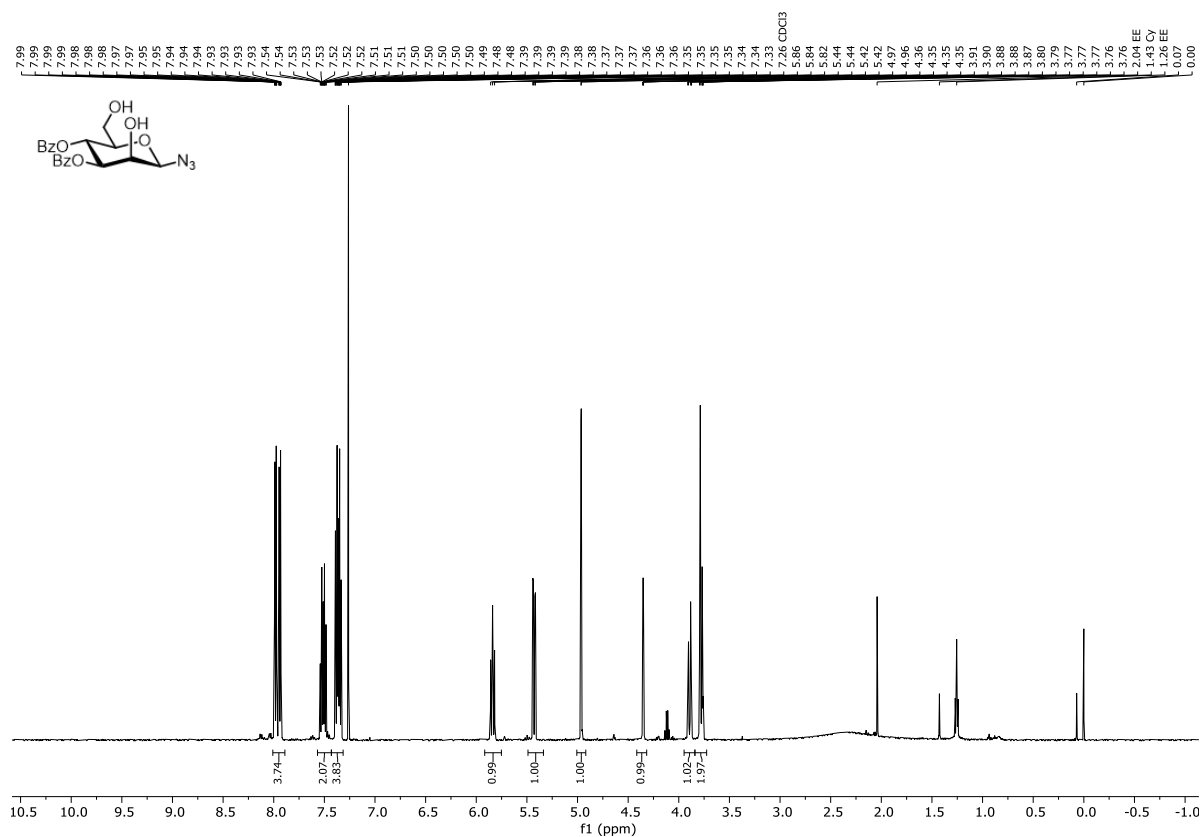

**Figure S96.** <sup>1</sup>H NMR spectrum of compound **S4** (500 MHz, CDCl<sub>3</sub>, 298 K).

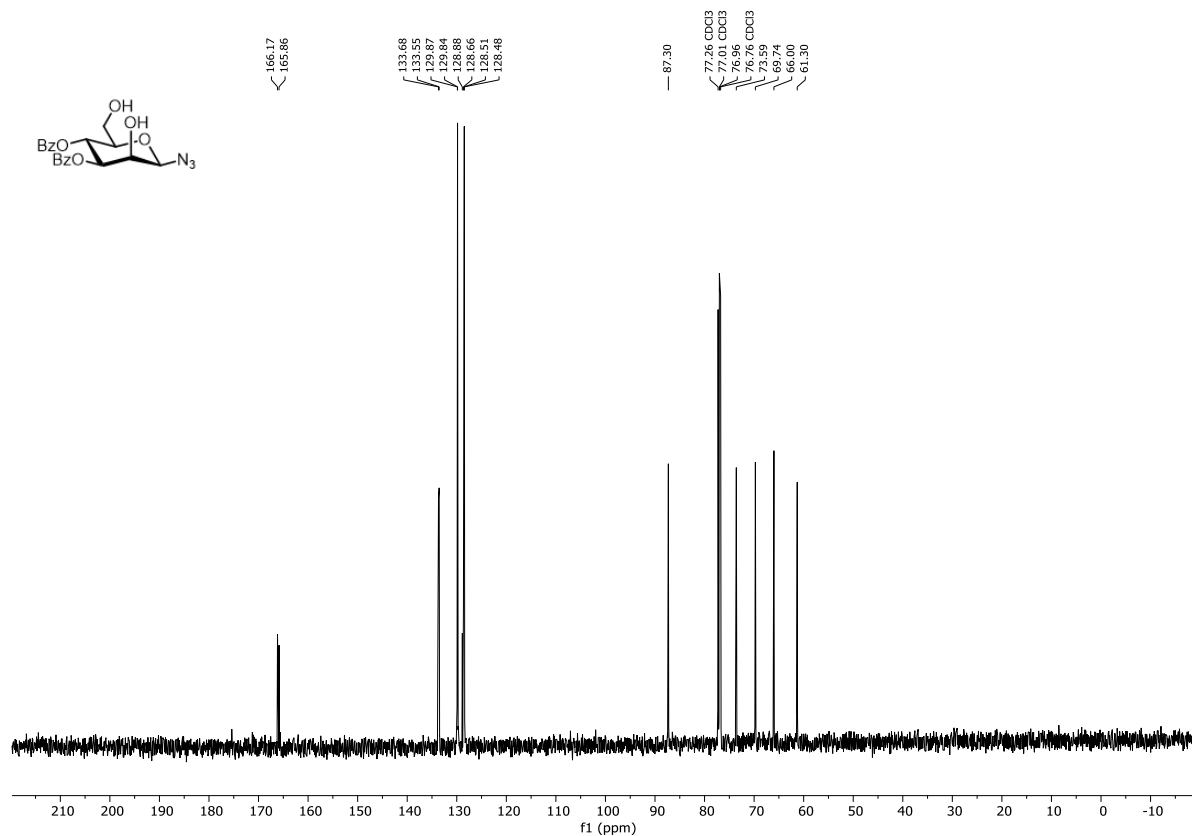

**Figure S97.** <sup>13</sup>C NMR spectrum of compound **S4** (126 MHz, CDCl<sub>3</sub>, 298 K).

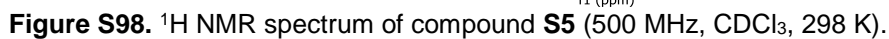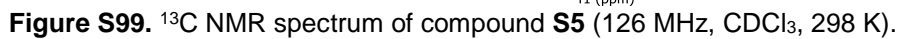

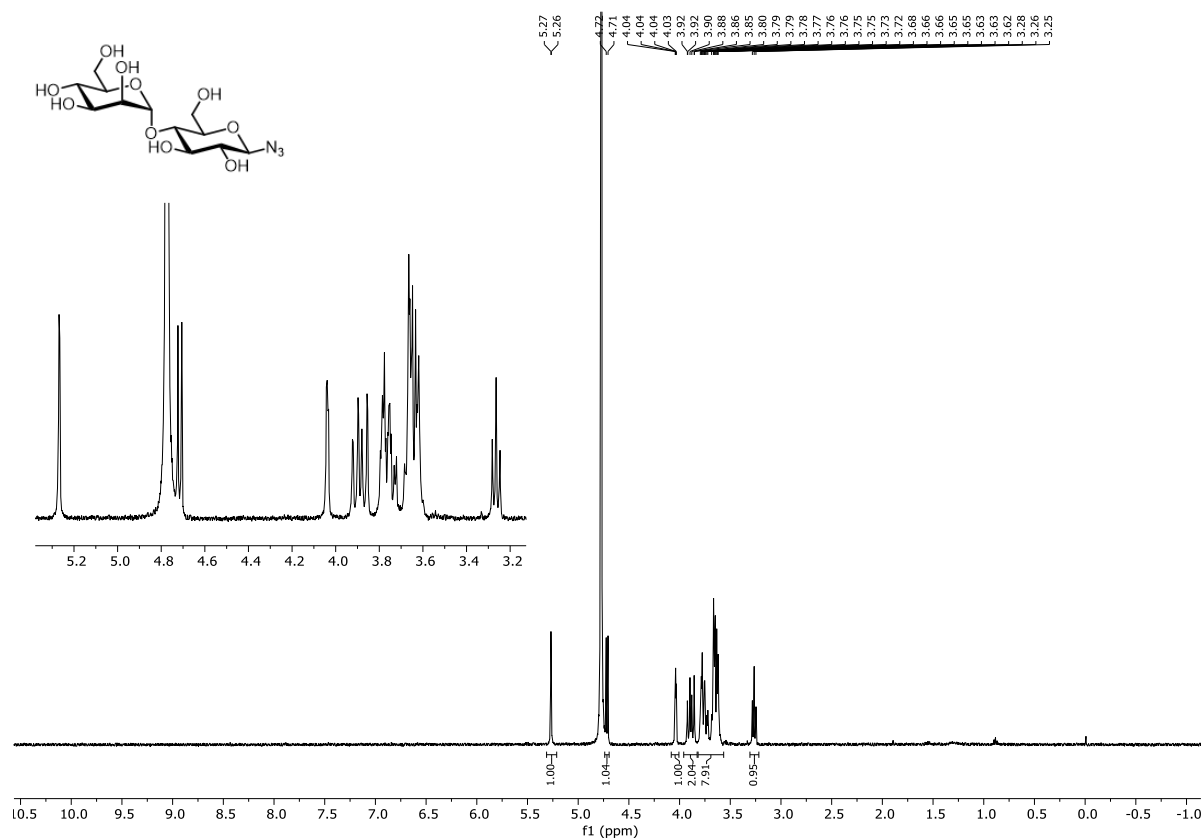

**Figure S100.**  $^1\text{H}$  NMR spectrum of compound **S6** (500 MHz,  $\text{D}_2\text{O}$ , 298 K).

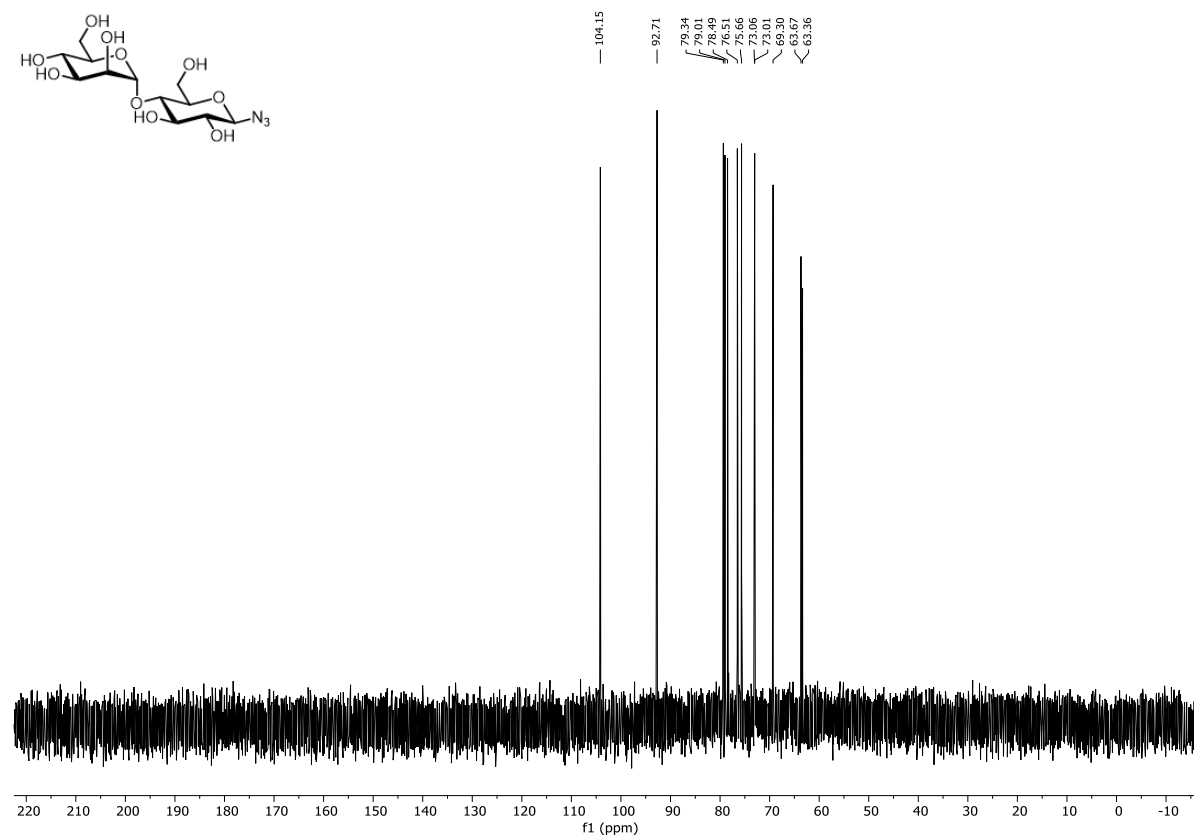

**Figure S101.**  $^{13}\text{C}$  NMR spectrum of compound **S6** (126 MHz,  $\text{D}_2\text{O}$ , 298 K).

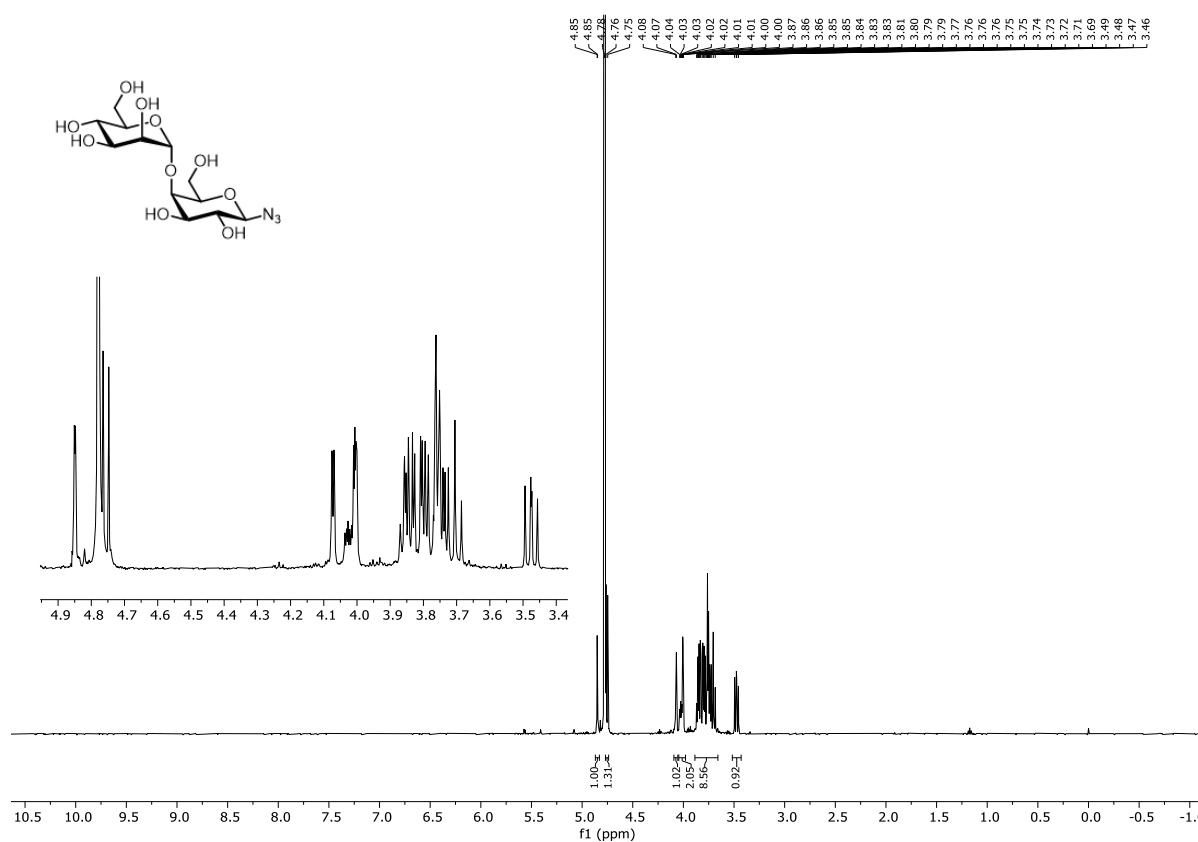

**Figure S102.** <sup>1</sup>H NMR spectrum of compound **S7** (500 MHz, D<sub>2</sub>O, 298 K).

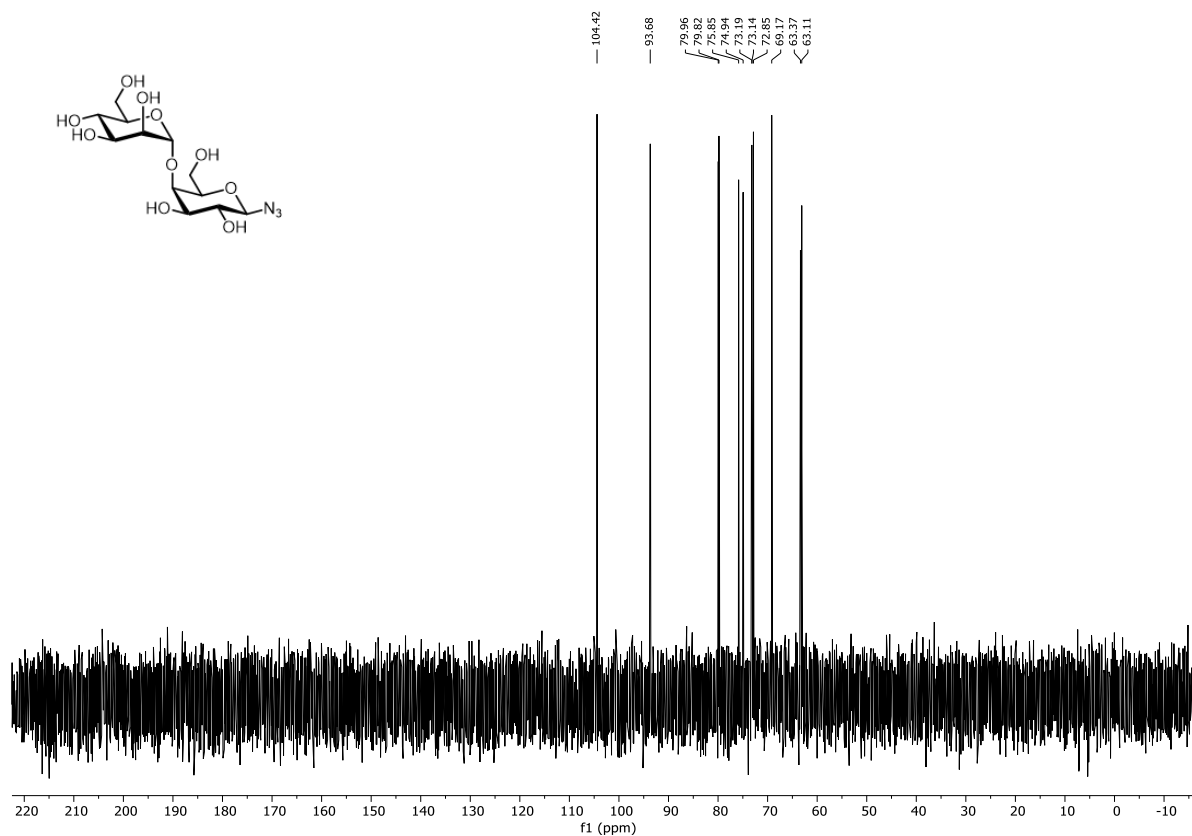

**Figure S103.** <sup>13</sup>C NMR spectrum of compound **S7** (126 MHz, D<sub>2</sub>O, 298 K).

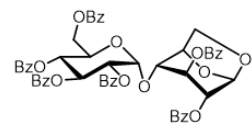

Chemical structure of compound 14 is shown in the top left. The structure is a dimer of two benzylidene-protected sugar units.

<sup>13</sup>C NMR spectrum (CDCl<sub>3</sub>) showing peaks (ppm):

- 166.26, 166.10, 165.78, 165.60, 165.47, 164.73, 133.72, 133.68, 133.60, 133.43, 133.31, 133.31, 130.41, 130.15, 130.05, 129.92, 128.88, 128.81, 128.81, 128.34, 128.19, 128.11, 128.84, 128.60, 128.70, 128.62, 128.55, 128.50, 128.49, 128.40, 99.10, 98.60, 77.56, 77.41, 77.16, 77.16, 77.16, 74.80, 74.63, 74.63, 71.50, 70.44, 69.52, 69.01, 68.97, 65.11, 65.02, 60.55, 14.34.

122

## 6. Literature

- [1] L. Wang, H. Kong, M. Jin, X. Li, R. Stoika, H. Lin, K. Liu, Synthesis of disaccharide modified berberine derivatives and their anti-diabetic investigation in zebrafish using a fluorescence-based technology, *Org. Biomol. Chem.* **2020**, *18*, 3563–3574.
- [2] C. M. Brunner, L. Pietsch, I. vom Sondern, M. Röhl, C. Popov, M. F. W. Trollmann, R. W. Taylor, M. Blessing, C. Holler, K. Almahayni, S. O. Jaeschke, V. Sandoghdar, R. A. Böckmann, T. K. Lindhorst, L. Möckl, Bottom-up investigation of spatiotemporal glycocalyx dynamics with interferometric scattering microscopy, *bioRxiv* **2025**, preprint, doi.org/10.1101/2025.05.09.653034.
- [3] M. Pinal, F. Charbonniere-Dumarcay, A. Marsura, S. Porwański, Synthesis of new saccharide azacrown cryptands, *Carbohydr. Res.* **2015**, *414*, 51–59.
- [4] C. Cavedon, E. T. Sletten, A. Madani, O. Niemeyer, P. H. Seeberger, B. Pieber, Visible-Light-Mediated Oxidative Debenzylation Enables the Use of Benzyl Ethers as Temporary Protecting Groups, *Org. Lett.* **2021**, *23*, 514–518.
- [5] J. Kraft, D. Schmollinger, J. Maudrich, T. Ziegler, Synthesis of Sugar-Derived Triazole- and Pyridine-Based Metal Complex Ligands, *Synthesis* **2015**, *47*, 199–208.
- [6] J. D'Onofrio, de Champdoré Marcella, L. De Napoli, D. Montesarchio, G. Di Fabio, Glycomimetics as Decorating Motifs for Oligonucleotides: Solid-Phase Synthesis, Stability, and Hybridization Properties of Carbopeptoid–Oligonucleotide Conjugates, *Bioconjug. Chem.* **2005**, *16*, 1299–1309.
- [7] J. P. Lorentzen, B. Helpap, O. Lockhoff, Synthesis of an Elicitor-Active Heptaglucan Saccharide for Investigation of Defense Mechanisms of Plants, *Angew. Chem. Int. Ed. Engl.* **1991**, *30*, 1681–1682.
- [8] Z. Györgydeák, H. Paulsen, Synthese von  $\beta$ -D-Mannopyranosylaziden; Untersuchung der anomeren Strukturen, *Justus Liebigs Ann. Chem.* **1977**, 1987–1991.
- [9] M. Hartmann, A. K. Horst, P. Klemm, T. K. Lindhorst, A kit for the investigation of live *Escherichia coli* cell adhesion to glycosylated surfaces, *Chem. Commun.* **2010**, *46*, 330–332.
- [10] A. Reisner, J. A. J. Haagensen, M. A. Schembri, E. L. Zechner, S. Molin, Development and maturation of *Escherichia coli* K-12 biofilms, *Mol. Microbiol.* **2003**, *48*, 933–946.
- [11] A. Wellens, C. Garofalo, H. Nguyen, N. V. Gerven, R. Slättegård, J.-P. Hernalsteens, L. Wyns, S. Oscarson, H. D. Greve, S. Hultgren, J. Bouckaert, Intervening with Urinary Tract Infections Using Anti-Adhesives Based on the Crystal Structure of the FimH–Oligomannose-3 Complex, *PloS One* **2008**, *3*, e2040.
